# Supplementary material for: Expression Profiling of Autism Candidate Genes during Human Brain Development Implicates Central Immune Signaling Pathways
Source: PLoS One. 2011 Sep 15;6(9):e24691. doi: 10.1371/journal.pone.0024691 (PMC3174192; doi:10.1371/journal.pone.0024691)
Supplement: Figure S3 — Expression profiles of 5 tissue-specific Intermediate Filament Genes. NEFL is specific to neurons (Neurofilament, Entrez ID 4747), GFAP is specific to Glia (Glial Fibriallary Acidic Protein, Entrez ID 2670), VIM is specific to mesoderm derivatives (Vimentin, Entrez ID 7431), DES is specific to muscle (Desmin, Entrez ID 1674), and KRT1 (Keratin, Entrez ID 3848) is specific to epithelium. (XLS) [file pone.0024691.s003.xls]

## Sheet: Sheet1
NEFL	21wg	24wg	4mo	6mo	4yr	11yr	15yr	23yr		GFAP	21wg	24wg	4mo	6mo	4yr	11yr	15yr	23yr
DLPC	44.2593	67.8301	387.694	14.1849	33.8605	268.976	505.456	156.79		DLPC	6.70046	8.22718	222.968	29.5893	80.5085	85.7957	113.957	521.173
VLPC	55.9941	119.55	412.6	19.0933	56.0888	232.812	449.537	273.645		VLPC	10.6587	15.3574	184.864	111.287	76.2773	98.9636	100.572	409.414
MPC	25.7002	20.2602	195.909	16.8961	84.012	183.139	265.427	348.005		MPC	8.58173	19.4829	186.268	120.604	203.171	151.555	188.249	332.406
OFC	40.3863	37.8259	248.913	11.1157	66.4208	170.937	394.743	229.503		OFC	6.77436	6.45992	338.138	18.7973	161.534	159.649	125.359	511.146
Motor	106.395	203.619	320.21	7.72996	95.5447	284.664	510.219	366.476		Motor	10.4432	41.1748	153.456	78.2077	154.707	121.207	196.996	341.167
Sensory	184.831	261.518	345.323	3.93603	81.8203	203.987	408.189	334.036		Sensory	12.3679	20.7432	110.394	15.1486	144.675	150.089	97.0651	295.886
PI Parietal	106.547	351.316	273.68	4.43456	117.423	213.311	384.806	393.677		PI Parietal	8.17935	17.9427	185.327	20.3733	71.7111	141.966	79.781	432.773
Auditory	50.2366	146.482	227.978	7.4179	89.5491	225.326	441.593	192.412		Auditory	6.61436	18.439	684.561	52.9916	77.9895	84.5574	157.236	387.139
PS Temp	92.7738	98.845	259.943	6.00716	28.9524	139.762	321.308	200.376		PS Temp	22.4088	15.8431	158.383	19.4743	92.0269	119.681	61.1975	317.754
IL Temp	79.273	146.137	199.736	8.31512	117.345	95.3216	294.247	115.745		IL Temp	37.5735	16.4031	140.464	13.108	79.176	129.134	78.2548	451.607
Visual	44.8085	52.3771	502.392	13.1096	33.2614	249.813	468.627	54.9752		Visual	92.4471	28.9319	236.823	14.5467	113.302	139.931	280.607	366.17
Hippo	81.0068	144.382	338.982	14.1009	83.4075	78.707		85.1898		Hippo	154.213	202.461	267.229	93.1993	1411.08	585.411		1462.87
Amygdala	23.77	6.53514	555.783	10.7411	35.4294	88.4673	241.092	36.2829		Amygdala	44.7032	85.6535	131.531	37.5041	466.762	356.048	595.434	1686.87
Striatum	4.18495	16.0983	552.159	6.43746	30.2966		103.45	26.2933		Striatum	37.3161	71.5006	269.237	11.0485	232.894		420.571	298.158
Thalamus	640.381	1169.26	216.866	28.2066	292.187		913.31	64.4758		Thalamus	105.313	38.4466	391.666	125.719	614.494		505.65	1436.22
Cerebellum	46.2674	138.323	35.6346	3.58764	26.5825	23.7543	64.8978	57.6298		Cerebellum	55.9521	65.1917	112.934	63.9498	161.914	54.4726	61.8306	738.847
VIM	21wg	24wg	4mo	6mo	4yr	11yr	15yr	23yr		DES	21wg	24wg	4mo	6mo	4yr	11yr	15yr	23yr
DLPC	43.1545	129.442	112.061	50.565	20.9655	40.6864	42.2137	63.3687		DLPC	0.059526	0.064879	2.34062	0.763268	1.20417	1.93629	1.08882	0.580454
VLPC	41.6378	193.039	69.953	74.2319	24.0826	39.6113	45.5591	56.3274		VLPC	0.033104	0.067978	1.91505	1.89541	0.694605	1.26448	2.40744	0.369125
MPC	50.0159	155.896	87.4405	72.7618	93.2055	43.6855	42.089	61.8633		MPC	0.040661	0	3.16791	0.773078	44.0524	0.777337	0.756358	0.827746
OFC	113.456	119.604	103.565	41.4324	58.1464	41.2332	46.9703	54.0156		OFC	0.040508	0.245161	1.39424	1.22483	2.86438	1.10902	1.39337	0.917136
Motor	38.3793	199.532	64.7552	53.7154	47.5339	53.1332	57.9418	61.3572		Motor	0	0	1.48394	0.367757	3.87578	0.452523	2.72862	0.483114
Sensory	42.802	122.77	89.3139	37.0467	42.4476	35.4928	35.5602	53.4471		Sensory	0	0.090273	3.74851	1.73504	3.55832	1.17609	0.956024	0.585037
PI Parietal	40.5779	106.547	73.5548	39.8015	40.2988	79.4003	29.298	81.4859		PI Parietal	0	0.061618	1.94929	0.410627	2.82634	5.46209	0.959617	7.69914
Auditory	29.026	121.201	228.957	47.1512	35.4022	52.5538	41.4615	92.4153		Auditory	0	0.176377	5.20043	2.06534	2.30449	0.578871	1.11435	3.59521
PS Temp	57.6682	152.3	70.6066	39.7829	27.8028	56.2083	33.8802	65.8846		PS Temp	0.047134	0.130452	1.38393	1.58162	2.72753	1.87152	1.02099	0.208524
IL Temp	106.174	135.264	54.614	39.2965	38.746	27.1129	41.4513	110.061		IL Temp	0.040608	0.104979	0.84911	0.592117	4.13025	0.450899	2.98874	0.740083
Visual	166.554	273.107	31.2609	21.3919	25.8855	48.1276	40.2858	89.7798		Visual	0	0.127459	0.596635	0.114611	2.08118	1.60651	0.31184	6.80461
Hippo	242.384	617.207	43.6251	55.579	95.658	43.9205		141.243		Hippo	0.052636	0.185702	1.42476	0.606265	0.13078	0.217148		8.48677
Amygdala	284.386	1109.84	27.3167	53.0217	56.0262	50.3596	89.5283	130.017		Amygdala	0.247676	0	1.60848	0.350258	0.863265	0.441042	0.469562	0.768377
Striatum	170.409	254.36	32.1194	27.4775	49.6968		119.527	119.966		Striatum	0	0.031511	0.957566	0.044148	2.23393		0.16574	0.211233
Thalamus	91.1179	133.838	70.7657	19.0006	23.5439		37.2911	47.0906		Thalamus	0.226833	0.090719	4.02457	0.382449	0.310993		0.192511	2.56245
Cerebellum	410.587	881.334	32.8432	43.5561	45.5836	18.3179	45.0458	26.531		Cerebellum	0.231663	0.478005	0.930733	0.289199	0.291696	0.242058	0.07628	0.466294
KRT1	21wg	24wg	4mo	6mo	4yr	11yr	15yr	23yr
DLPC	0.042929	0.159837	0.159779	0	0.100676	0.060265	0.098823	0.307288
VLPC	0.110518	0.186699	0.045185	0	0.031604	0	0.142889	0
MPC	0.074717	0.167523	0.105206	0.115532	0.089544	0	0.061724	0.06429
OFC	0.118456	0.098208	0.193835	0.057163	0.218408	0.132474	0	0
Motor	0	0.520942	0.21168	0.058076	0.151792	0.020555	0.110864	0.043072
Sensory	0	0.334734	0.241767	0	0	0.021685	0	0.022195
PI Parietal	0	0.022523	0	0.066557	0	0.023931	0	0.038973
Auditory	0.06772	0.101416	0.08563	0.018874	0.09349	0.021468	0	0.031869
PS Temp	0.306865	0.290633	0.052265	0.050695	0.043271	0.043407	0	0.04398
IL Temp	0.087857	0.055575	0.155377	0	0.060751	0.011959	0.023508	0.043378
Visual	0.067085	0.234702	0.034503	0	0	0.019579	0	0.039924
Hippo	0.245443	0.201024	0.002811	0	0	0.067422		0.042153
Amygdala	0.179844	0.153903	0.0233	0	0.239336	0.200158	0.050005	0
Striatum	0.025699	0.083941	0.038324	0	0.021685		0	0
Thalamus	0.220052	0.066322	0.04833	0	0		0	0
Cerebellum	0.05232	0.224001	0.052249	0	0	0	0.018589	0.021746
