# Supplementary material for: Expression Profiling of Autism Candidate Genes during Human Brain Development Implicates Central Immune Signaling Pathways
Source: PLoS One. 2011 Sep 15;6(9):e24691. doi: 10.1371/journal.pone.0024691 (PMC3174192; doi:10.1371/journal.pone.0024691)
Supplement: Figure S5 — Expression profile of the most highly expressed ASD-implicated genes. (XLS) [file pone.0024691.s005.xls]

## Sheet: Sheet1
FABP7	21wg	24wg	4mo	6mo	4yr	11yr	15yr	23yr		PDZD4	21wg	24wg	4mo	6mo	4yr	11yr	15yr	23yr
DLPC	768.631	501.437	109.457	186.958	74.057	40.8956	30.9531	84.1628		DLPC	203.206	169.879	321.056	12.6773	65.1429	161.85	238.858	192.517
VLPC	546.417	448.412	106.805	191.91	100.54	36.9145	45.4781	48.6811		VLPC	114.167	167.018	276.062	36.5706	85.9808	189.041	199.804	148.828
MPC	686.184	356.16	129.598	191.707	117.418	58.7937	68.7847	44.1545		MPC	121.998	182.697	213.03	12.3618	100.016	144.319	148.655	151.26
OFC	932.008	623.448	61.0023	164.983	86.3117	36.9346	40.4455	39.9119		OFC	153.969	133.312	244.61	8.71982	117.809	138.051	220.363	159.728
Motor	321.616	445.958	123.836	142.596	63.8265	35.7742	27.4007	40.0458		Motor	156.122	150.178	223.864	9.8433	122.692	138.461	204.06	160.572
PS Temp	1067.47	827.161	145.02	169.919	144.848	81.3634	33.9417	35.4204		PS Temp	287.967	155.34	213.613	8.43084	88.8288	184.918	131.446	134.323
IL Temp	634.771	561.527	198.754	177.717	59.1036	117.073	37.3239	70.3101		IL Temp	262.417	178.353	179.072	7.73039	104.274	101.107	165.707	157.588
Hippo	188.235	358.671	29.1938	102.679	120.423	188.622		47.3147		Hippo	130.491	85.771	241.06	9.54955	215.933	48.4032		68.472
Amygdala	315.491	1075.54	18.1956	88.324	125.074	72.4433	40.0548	70.8847		Amygdala	140.305	78.2523	193.601	7.74332	86.3698	91.5914	117.004	44.0734
Striatum	201.412	211.142	15.6313	57.4789	42.8588		23.1904	19.7075		Striatum	253.376	173.962	215.332	2.04503	122.426		206.007	68.5192
Cerebellum	326.037	523.823	70.178	171.036	199.09	72.9779	117.711	108.55		Cerebellum	136.216	114.099	64.0408	43.4161	99.3661	119.819	127.773	122.001
GNAS	21wg	24wg	4mo	6mo	4yr	11yr	15yr	23yr		RPL10	21wg	24wg	4mo	6mo	4yr	11yr	15yr	23yr
DLPC	159.286	252.743	208.306	35.3449	77.2107	124.933	181.109	162.483		DLPC	66.8165	302.496	20.4269	41.3247	85.4097	41.5991	12.9326	18.5288
VLPC	137.799	289.662	192.336	80.0852	83.175	113.244	174.188	185.13		VLPC	55.6717	335.815	16.0553	37.7838	33.6997	40.6512	15.0324	23.1832
MPC	170.258	251.678	203.763	52.5154	112.193	143.062	148.47	178.517		MPC	89.3403	287.556	40.0337	27.2412	94.9258	36.1109	17.5658	23.3487
OFC	174.605	270.911	148.26	33.7042	102.175	110.276	165.843	160.904		OFC	91.1535	371.55	20.7594	42.1073	75.6242	46.9965	8.61575	24.4949
Motor	135.649	268.577	193.361	42.4454	124.367	124.793	180.804	178.193		Motor	78.3805	361.651	29.0673	44.5741	62.9797	50.5897	19.7577	21.1761
PS Temp	297.779	286.81	186.424	36.1834	76.197	65.0129	162.138	159.263		PS Temp	162.129	424.579	33.9717	34.3972	92.7555	58.5983	22.616	22.7528
IL Temp	268.526	262.744	170.403	29.747	103.749	38.971	152.553	132.749		IL Temp	167.762	278.184	34.757	27.6503	40.5476	55.1599	23.4361	23.5531
Hippo	163.396	259.873	256.684	35.4924	121.424	32.7981		91.9404		Hippo	78.3861	302.247	59.8711	24.9565	25.6004	83.0631		29.5313
Amygdala	168.04	305.763	244.031	34.7974	106.965	167.603	136.416	88.6526		Amygdala	107.067	501.901	22.1074	25.6847	88.3043	30.8326	19.8011	29.5681
Striatum	164.852	256.696	259.519	11.9399	54.4804		59.656	49.7107		Striatum	97.6414	300.673	28.6496	29.4017	61.0986		21.6439	27.589
Cerebellum	125.838	208.131	94.5614	96.9388	179.951	167.515	181.018	206.718		Cerebellum	88.2365	272.763	80.6876	187.222	135.505	42.6984	53.1978	57.5367
GPX1	21wg	24wg	4mo	6mo	4yr	11yr	15yr	23yr		SEZ6L2	21wg	24wg	4mo	6mo	4yr	11yr	15yr	23yr
DLPC	25.7603	118.122	41.6915	71.2556	181.384	84.7673	45.0796	44.194		DLPC	38.989	80.0677	81.7968	2.0257	17.2516	82.8356	72.4499	28.4765
VLPC	18.261	137.036	31.5737	76.3144	69.4785	102.368	52.227	59.2597		VLPC	27.0037	96.8562	79.1652	6.1396	10.8991	75.9117	53.0922	45.2977
MPC	21.6264	104.663	49.1252	55.6954	205.257	49.8352	42.4151	56.9675		MPC	27.9821	81.6663	60.0157	2.16487	26.8541	49.5816	34.3807	47.6963
OFC	26.8265	130.599	66.7484	60.8584	251.232	66.0508	47.2329	50.2705		OFC	30.8715	78.5911	82.9893	1.2816	31.8279	54.6129	67.2132	40.1717
Motor	37.1184	148.802	31.8698	47.0993	153.816	70.6148	57.8715	55.6381		Motor	52.3049	82.1458	51.5682	1.91712	36.548	65.0764	56.4476	43.2189
PS Temp	46.8927	155.924	38.9264	56.2894	191.858	116.533	48.373	56.2882		PS Temp	71.0926	75.2494	40.403	3.14858	9.99596	32.3018	45.3405	39.9683
IL Temp	47.8704	99.7	31.1211	46.9735	149.951	116.207	47.1694	45.4453		IL Temp	58.6039	73.8451	24.8636	2.07902	56.542	22.0932	51.3965	28.5241
Hippo	27.5318	112.637	168.327	36.0912	59.4387	117.492		43.8213		Hippo	47.9457	64.8308	38.2995	2.33024	34.1845	17.7862		17.7834
Amygdala	31.3363	129.404	58.416	38.0141	147.46	40.8852	27.5402	38.7046		Amygdala	37.5373	30.0636	72.4312	1.51336	17.0191	30.295	48.9501	12.0335
Striatum	35.5803	80.8497	65.0003	59.4081	59.2697		45.8637	34.6743		Striatum	49.2455	57.5049	78.5621	0.182377	12.6521		35.077	14.8816
Cerebellum	30.3891	104.162	149.702	160.216	112.142	24.6797	46.9602	48.9387		Cerebellum	18.4395	37.552	8.2037	32.8064	49.5227	63.051	101.208	85.1599
HNRNPH2	21wg	24wg	4mo	6mo	4yr	11yr	15yr	23yr		TSPAN7	21wg	24wg	4mo	6mo	4yr	11yr	15yr	23yr
DLPC	39.9244	58.1219	63.9574	1.43613	8.13526	52.5577	57.0548	38.9447		DLPC	44.165	88.2341	164.036	17.2682	27.1202	190.628	189.04	158.182
VLPC	56.677	58.5855	69.1661	5.43775	22.0919	50.2258	50.7133	64.8434		VLPC	47.1927	98.7941	164.792	54.0993	65.7009	178.171	195.192	203.227
MPC	65.434	55.5463	60.3226	5.67409	10.4742	51.9432	47.3681	65.7269		MPC	59.5428	96.5092	155.943	34.4799	54.1626	175.053	175.891	219.694
OFC	60.0234	51.3012	29.9648	2.32442	6.49799	52.2982	54.1228	59.8475		OFC	54.4339	82.9883	144.476	20.2096	60.8054	165.616	185.206	191.648
Motor	40.6352	59.1175	63.9412	4.77184	12.1827	50.3399	49.2537	53.3184		Motor	56.7984	112.659	165.979	40.2276	88.7786	185.067	167.213	202.588
PS Temp	50.2753	41.768	71.4167	2.79788	7.49629	35.6247	57.4627	50.9021		PS Temp	78.8918	68.971	154.828	25.5269	41.3762	114.901	232.772	195.814
IL Temp	53.041	57.7396	65.9859	2.24631	14.6262	39.991	55.7572	46.1719		IL Temp	69.5007	76.1649	122.372	13.6584	98.0899	120.136	201.155	204.488
Hippo	46.6008	63.984	33.3694	3.39676	14.5653	35.5154		39.3063		Hippo	119.343	186.418	120.742	21.2639	70.3104	95.3566		119.382
Amygdala	30.3793	49.2839	83.9492	3.35037	9.96728	42.9161	55.143	35.3108		Amygdala	48.0955	83.2926	223.393	14.0679	45.6799	82.5915	181.569	88.7382
Striatum	28.644	51.8992	82.9076	1.1819	18.4815		27.853	35.2597		Striatum	85.4145	178.116	219.38	3.15727	116.232		175.871	145.223
Cerebellum	36.4859	51.1092	8.16155	5.79934	35.7027	60.409	63.2251	59.2711		Cerebellum	101.873	165.488	24.5974	28.1498	160.799	214.412	242.568	243.047
HRAS	21wg	24wg	4mo	6mo	4yr	11yr	15yr	23yr
DLPC	48.8474	67.4486	54.9402	21.847	75.6027	68.6465	55.7741	65.4779
VLPC	31.5875	76.9219	47.8989	37.5437	67.1727	64.3564	48.8522	49.5434
MPC	42.0178	63.5954	52.5434	21.6202	83.4509	60.3138	47.4987	46.6877
OFC	45.3624	71.4614	44.3887	16.2598	85.5871	56.5851	51.5211	49.8091
Motor	48.7465	73.7027	46.6747	16.8347	80.1228	64.5225	53.1665	49.1981
PS Temp	97.3735	76.2188	48.7304	18.3124	76.8157	73.1712	45.2438	43.9641
IL Temp	85.2779	53.3867	41.6449	11.614	64.3746	68.9371	44.5126	40.7254
Hippo	39.5269	56.2056	76.3807	14.9957	82.9909	81.3373		37.9857
Amygdala	39.077	39.1105	44.1578	13.4838	85.0996	47.6893	37.8277	27.5526
Striatum	48.232	55.6626	50.0401	11.5298	130.338		88.8977	51.14
Cerebellum	46.5913	73.6117	61.3265	63.2312	78.4675	46.6399	49.5435	46.2397
