# Supplementary material for: Expression Profiling of Autism Candidate Genes during Human Brain Development Implicates Central Immune Signaling Pathways
Source: PLoS One. 2011 Sep 15;6(9):e24691. doi: 10.1371/journal.pone.0024691 (PMC3174192; doi:10.1371/journal.pone.0024691)
Supplement: Table S1 — Genes from AutDB, SZGene, and CarpeDB. (XLSX) [file pone.0024691.s010.xlsx]

## Sheet: AutDB Database
Supplementary Table S1a. AutDB Database Gene List of all implicated genes in Autism Spectrum Disorders (accessed 2/16/11)
Gene Symbol	Entrez GeneID	Gene Name	Chromosomal Location	Evidence of Support	Number of gene association studies	Number of positive association studies	Number of negative association studies	Support for Autism	UniprotID	Gene Association Database	OMIM	Molecular Function	Alternate Names	Positive Reference	Primay Reference	Negative Reference	Most cited paper	Most Recent Papers
A2BP1	54715	ataxin 2-binding protein 1	16p13.3	Rare single gene mutation / Genetic association	2	1	0	De novo CNV	Q9NWB1			sequence-specific RNA recognition, splicing regulators	A2BP1, FOX1, HRNBP1	17503474	17363630	0	10814712	20724578, 19762510, 19190090, 18978772, 18794351, 18573872, 16362037, 17101796
ABAT	18	4-aminobutyrate aminotransferase	16p13.2	Association	1	1	0	Genetic association	P80404			The encoded protein mediates catabolism of GABA into succinic semialdehyde.	GABAT, NPD009, GABA-AT, GABA transaminase	15830322	15830322	0	3092125, 9554704	16793827
ADA	100	adenosine deaminase	20q12-q13.11	Association	3	3	0	Strong	P00813	115442	608958	The encoded protein catalyzes the hydrolysis of adenosine to inosine.	NA	17340203, 11354825, 11121182	11354825	0	4117384	16258000
ADORA2A	135	adenosine A2a receptor	22q11.23	Genetic association	1	1	0	Nominal association with the disorder was observed for rs2236624-CC, and phenotypic variability in ASD symptoms was influenced by rs3761422, rs5751876 and rs35320474	P29274			The encoded protein is a receptor subtypes for adenosine	RDC8; hA2aR; ADORA2	19565319	19565319	0	7953635, 9262401	19443488, 18184569, 18953346, 18832607
ADRB2	154	adrenergic, beta-2-, receptor, surface	5q31-q32	Association	2	2	0	Association	P07550			This gene encodes beta-2-adrenergic receptor which is a member of the G protein- coupled receptor superfamily.	BAR, B2AR, ADRBR, ADRB2R, BETA2AR	17199132, 16417856	17199132	0	8837779, 9363896	18485874, 17962520, 17952055,17175110, 17179741
ADSL	158	adenylosuccinate lyase	22q13.1, 22q13.2	Syndromic autism	4	0	0	Seconday autism in a subset of individuals with adenylosuccinate lyase deficienc y.	P30566		608222	The encoded protein mediates de novo synthesis of purines and formation of adeno sine monophosphate from inosine monophosphate.	NA	0	15471876	0	6150139, 1302001	16403972
AGTR2	186	angiotensin II receptor, type 2	Xq22-q23	Syndromic autism	1	0	0	Seconday autism in a subset of individuals with disruption in AGTR2.	P50052		300034	The encoded protein has angiotensin type II receptor activity.	AT2, ATGR2, MRX88	0	12089445	0	12089445	16769992
AHI1	54806	Abelson helper integration site 1	6q23.3	Syndromic / Association	2	1	0	Syndromic / Association	Q8N157			modular protein that contains one SH3 motif and seven WD40 repeats	ORF1; AHI-1; JBTS3; FLJ14023; FLJ20069; dJ71N10.1; DKFZp686J1653	18782849	18782849	0	15467982, 15322546	18950740, 18636121, 16244321
ALDH5A1	7915	aldehyde dehydrogenase 5 family, member A1 (succinate-semialdehyde dehydrogenase )	6p22.2-p22.3	Syndromic autism	1	0	0	Autism in some individuals with succinic semialdehyde dehydrogenase deficiency.	P51649		610045	The encoded protein is a mitochondrial NAD(+)-dependent succinic semialdehyde de hydrogenase.	SSDH, SSADH	0	12743223	0	8689400	1650448, 15341910
ALOX5AP	241	arachidonate 5-lipoxygenase-activating protein	13q12	Functional	1	0	0	Differential expression in lymphoid cell lines from individuals with autism spec trum disorders.	P20292			The encoded protein mediates leukotriene synthesis.	FLAP	0	16709250	0	2300173, 8522947	16698924
ANKRD11	29123	ankyrin repeat domain 11	16q24.3	Rare single gene mutation	1	0	0	CNV	Q6UB99			Transcription factor	T13; LZ16; ANCO-1	0	18252227	0	15184363	19920853, 18840648, 18377363, 17286281
APC	324	adenomatosis polyposis coli	5q21-q22	Association / Rare single gene mutation	2	1	0	Mixed	P25054	144332	175100	The encoded protein is a tumor supressor.	GS, DP2, DP3, FAP, FPC, DP2.5	17221838	8071957	0	9065402	16407829
AR	367	Androgen Receptor	Xq11.2-q12	Association	1	1	0		P10275			The protein functions as a steroid-hormone activated transcription factor.		19167832	19167832	0	2062380, 16272115	16603237, 18467440, 18799683
ARNT2	9915	aryl-hydrocarbon receptor nuclear translocator 2	15q24	Candidate gene assocaition	1	1	0	Nominal significance at P < 0.05 with both autistic traits and AS case-control studies	Q9HBZ2			A member of the basic-helix-loop-helix-Per-Arnt-Sim (bHLH-PAS) superfamily of transcription factors	bHLHe1; KIAA0307	19598235	19598235	0	9545558, 11381139, 11318878	19234064, 19074369
ARX	170302	aristaless related homeobox	Xp22.1-22.3	Syndromic autism	3	0	0	Autism in some individuals with	Q96QS3		300382	The encoded protein is a transcription factor.	aristaless related homeobox,ISSX, PRTS, MRX36, MRX43, MRX54, MRXS1	0	14631200	0	12142061, 12376946, 11971879	16650978
ASMT	438	acetylserotonin O-methyltransferase	Xp22.3 or Yp11.3	Genetic association	1	1	0	Association	P46597			melatonin biosynthesis	ASMTY, HIOMT, HIOMTY, Hydroxyindole-O-methyltransferase	17505466	17505466	0	487129, 14275158	17204557
ASS	445	argininosuccinate synthetase	9q34.1	Functional	1	0	0	Differential expression in lymphoid cell lines from individuals with autism spec trum disorders.	P00966			The encoded protein has argininosuccinate synthase activity.	ASS1, CTLN1	0	16709250	0	7507106	16580861
ASTN2	23245	astrotactin 2	Chromosome 9: 118,227,328-119,217,138	Rare Single Gene Mutation	1	0	0	CNV from GWAS study	O75129			neuronal - astroglial interaction	RP11-45A16.2, KIAA0634, bA67K19.1	0	19404257	0	3276720	18839057, 3276720
ATP10A	57194	Probable phospholipid-transporting ATPase VA	15q11.2	Yes/No Association	2	1	1	Genetic association	O60312		605855	The encoded protein is a member of the aminophospholipid-transporting ATPase fam ily.	ATP10C	12851639	12851639	11857573	11326269	16517145
AUTS2	26053	autism susceptibility candidate 2	7q11.22	Rare single gene mutation	1	0	0	Cytogenetic evidence	Q5D049			unknown	NA	0	12160723	0	12160723	19948250, 19567891, 19546859, 17211639, 16395125
AVPR1A	552	arginine vasopressin receptor 1A	12q14-q15	Association	3	3	0	Strong	P37288	123464		The encoded protein is a receptor for arginine vasopressin. It belongs to the G -protein coupled receptor family.	NA	16520824,15098001, 12082568	16520824	0	10466725	15947188, 16205790, 16504276
BZRAP1	9256	benzodiazapine receptor (peripheral) associated protein 1	17q22-q23	Rare single gene mutation	1	1	0	Rare variants in exonic deletion loci identified in both discovery and replication cohorts, but none of 2539 controls	O95153		Multi-domain adaptor protein		PRAX1; PRAX-1; RIMBP1; RIM-BP1; KIAA0612; DKFZp686F02123; BZRAP1	19557195	19557195	0	10748113, 9915832	19751509
C3orf58	205428	chromosome 3 open reading frame 58	3q24	Rare single gene mutation	1	0	0	CNV	Q8NDZ4			unknown	DIA1	0	18621663	0
C4B	721	complement component 4B	6p21.3	Association	3	3	0	Strong	P0C0L5	4133		The encoded protein is part of the classical pathway of the complement system.	CH, C4A, C4F, CO4, C4B1, C4B2, C4B3, C4B5, C4A13, C4A91, C4B12, CPAMD3	15694999, 7760985, 8118537	15694999	0	6401549, 7541036	6401549
CA6	765	carbonic anhydrase VI	1p36.2	Rare single gene mutation	1	1	0	Rare variants in exonic deletion loci identified in both discovery and replication cohorts, but none of 2539 controls	P23280			The protein encoded by this gene is one of several isozymes of carbonic anhydrase.	CA-VI; GUSTIN; MGC21256	19557195	19557195	0	10616163, 9784398,8761494, 6943587	18091364
CACNA1C	775	calcium channel, voltage-dependent, L type, alpha 1C subunit	12p13.3	Syndromic autism	1	0	0	Seconday autism in a subset of individuals with Timothy syndrome.	O95234		114205	The encoded protein has low voltage-gated calcium channel activity.	TS, CACH2, CACN2, CaV1.2, CCHL1A1, CACNL1A1	0	15454078	0	11441182, 8622942	19074970, 19065143, 18711365, 18458091,18250309, 18174367, 17640527, 17698014, 1 6289402
CACNA1D	776	calcium channel, voltage-dependent, L type, alpha 1D	3p14.3	Functional	1	0	0	Functional	Q01668		114206	The encoded protein has low voltage-gated calcium channel activity.	CACH3, CACN4, CCHL1A2, CACNL1A2	0	10611367	0	11285265	16172271
CACNA1F	778	calcium channel, voltage-dependent, alpha 1F	Xp11.23	Syndromic autism	1	0	0	Syndromic	O60840		300110	The encoded protein has low voltage-gated calcium channel activity.	JM8, JMC8, CSNB2, CSNBX2	0	11441182	0	9662399	16650384, 16155113
CACNA1G	8913	calcium channel, voltage-dependent, T type, alpha 1G subunit	17q22	Genetic association	1	1	0	Markers within an interval containing the gene were found to be associated at a locally significant level, P=1.9 x 10(-5).	O43497			Voltage-activated calcium channels	NBR13; Cav3.1; Ca(V)T.1; MGC117234	19455149	19455149	0	10493502, 11498049, 12853961	19520861, 19211869, 19003958
CACNA1H	8912	calcium channel, voltage-dependent, alpha 1H subunit	16p13.3	Rare single gene mutation	1	0	0	Missense mutations in ASD families	O95180	144937		The encoded protein has low voltage-gated calcium channel activity.	T-type Ca(V)3.2 channels, CACNA1HB	0	16754686	0	14729682	19144837, 19131331, 19052226, 18292205, 18230611, 18230611, 17215393, 17696120, 16759699
CADM1	23705	cell adhesion molecule 1	11q23.2	Rare single gene mutation	1	0	0	Two missense mutations, C739A(H246N) and A755C(Y251S),were identified in the CAD M1 gene of male Caucasian ASD patients and their family members	Q9BY67			The gene encodes a brain-specific, immunoglobulin domain-containing protein. It binds to intracellular PDZ-domain proteins and functions as a homophilic cell ad hesion molecule at the synapse.	BL2; ST17; IGSF4; NECL2; RA175; TSLC1; IGSF4A; Necl-2; SYNCAM; sgIGSF; sTSLC-1; synCAM1; MGC51880; MGC149785; DKFZp686F1789; CADM1	0	18957284	0	12202822	18606990, 18054859, 18615557
CADPS2	93664	Ca2+-dependent activator protein for secretion 2	7q31.3	Functional / No Association	2	0	1	Functional candidate; Positional candidate	Q658Q2			The encoded protein has Calcium binding acitivity and mediates vesicle exocytosi s.	FLJ40851, KIAA1591	0	17380209	12659812	12659812	19238500, 17428348, 17344385
CBS	875	cystathionine beta-synthase	21q22.3	Functional	1	0	1	Homocystinuria is linked to psychiatric disturbance, intelligence, other CNS p roblems, and responsiveness to vitamin B6.	P35520		236200	The encoded protein catalyzes conversion of homocysteine to cystathionine.	HIP4	0	12227460	12227460	3872065	16842141
CCDC64	92558	coiled-coil domain containing 64	Chromosome 12: 118,912,031-119,016,682	Genetic Association	1	1	0	Suggestive association signals (P < 1 X 10 -5) in the two discovery cohorts in GWA study	Q6ZP65				FLJ26450, H_267D11.1	19404256	19404256	0
CD44	960	CD44 molecule (Indian blood group)	11p13	Functional	1	0	0	Differential expression in lymphoid cell lines from individuals with autism spec trum disorders.	P16070			The encoded protein is a receptor for hyaluronic acid. It is a cell-surface gly coprotein involved in cell-cell interactions, cell adhesion and migration.	IN, LHR, MC56, MDU2, MDU3, MIC4, Pgp1, CDW44, HCELL, MUTCH-I, ECMR-III, MGC10468	0	16709250	0	1694723	16849507
CDH10	1008	cadherin 10, type 2 (T2-cadherin)	Chromosome 5: 24,522,967-24,680,668	Genetic Association	1	1	0	First GWA study. Six single nucleotide polymorphisms between CDH10 and CDH9 revealed strong association signals in GWAS study.	Q9Y6N8		604555	cell adhesion		19404256	19404256	0	10386616, 10861224	18084254, 16181616
CDH22	64405	cadherin-like 22	Chromosome 20: 44,235,783-44,313,741	Genetic Association	1	1	0	Suggestive association signals (P < 1 X 10 -5) in the two discovery cohorts in GWA study	Q9UJ99		609920	cell adhesion	C20orf25, MGC39564, dJ998H6.1	19404256	19404256	0	10727640	16896191
CDH9	1007	cadherin 9, type 2 (T1-cadherin)	Chromosome 5: 26,916,466-27,074,446	Genetic Association	1	1	0	First GWA study. Six single nucleotide polymorphisms between CDH10 and CDH9 revealed strong association signals in GWAS study.	Q9ULB4		609974	cell adhesion	MGC125386	19404256	19404256	0	10861224	7668045
CDKL5	6792	cyclin-dependent kinase-like 5	Xp22	Syndromic autism	3	0	0	Seconday autism in a subset of individuals with Rett syndrome.	O76039		300203	The encoded protein has serine/thronine kinase activity.	STK9	0	15492925	0	15492925	19241098, 16611748
CENTG2	116987	centaurin, gamma 2	2p24.3-p24.1	Rare single gene mutation / Association	1	1*	0	Rare polymorphisms; Contradictory results for association	Q4ZG22	142193		The encoded protein is a novel binding partner of nitric oxide-sensitive guanyly l cyclase	AGAP1, GGAP1, KIAA1099, MGC71657	15892143	15892143	0	12388557	16332543, 15381706
CNR1	1268	cannabinoid receptor 1 (brain)	6q14-q15	Functional	1	0	0	Interesting functional candidate	P21554			The encoded protein has cannabinoid receptor activity.	CB1, CNR, CB-R, CB1A, CANN6, CB1K5	0	16623851	0	9888857, 10341254	16819552, 16723537,
CNTN4	152330	contactin 4	3p26-p25	Rare single gene mutation	3	1	0	Recurrent copy number variations	Q8IWV2			Neuronal cell adhesion molecule	AXCAM; BIG-2; CNTN4A; MGC33615; CNTN4	19404257	18349135	0	8586965	18551756, 18367085
CNTNAP2	26047	contactin associated protein-like 2	7q35-q36	Genetic Association / Rare single gene mutation	3	2	0	Replication of genetic association	Q9UHC6.1			This gene encodes a member of the neurexin family which functions in the vertebr ate nervous system as cell adhesion molecules and receptors. This protein is loc alized at the juxtaparanodes of myelinated axons and associated with potassium c hannels.	CDFE; NRXN4; CASPR2; DKFZp781D1846	18179893, 18179894	18179894	0	10624965	20176116, 20164332, 18987363, 18179895, 19109503, 19166515
CNTNAP5	129684	contactin associated protein-like 5	2q14.3	Rare single gene mutation	1	0	0	Three nonsynonymous mutations were detected in Caucasian ASD probands; A 227 kb exonic deletion in CNTNAP2 identified in a proband	Q8WYK1			A multidomain transmembrane protein involved in cell adhesion and intercellular communication	caspr5	0	20346443	0	16845472	20451256, 19721433
CTNNA3	29119	catenin (cadherin-associated protein), alpha 3	Chromosome 10: 67,349,875-69,125,933	Genetic Association	1	1	0	Suggestive association signals (P < 1 X 10 -5) in the two discovery cohorts in GWA study	Q9UI47		607667	cell adhesion	RP11-433J16.1, MGC26194, MGC75041, VR22	19404256	19404256	0	15039120, 15075440	19187332, 17761686
CTTNBP2	83992	cortactin binding protein 2	7q31	No Association	1	0	1	Positional candidate	O43389		609772	A similar gene in rat interacts with a central regulator of the actin cytoskelet on.	Orf4, C7orf8, CORTBP2, FLJ34229, KIAA1758, MGC104579	0	11707066	11707066	15364959
CXCR3	2833	chemokine (C-X-C motif) receptor 3	Xq13	Rare single gene mutation	1	0	0	Missense mutations identified in ASD individulas.	P49682			A G protein-coupled receptor with selectivity for the chemokines IP10, Mig and I-TAC.	GPR9; MigR; CD182; CD183; Mig-R; CKR-L2; CMKAR3; IP10-R; CXCR3	0	20479760	0	9466968, 12782716, 15456824	19919575, 19115931
CYP11B1	1584	cytochrome P450, family 11, subfamily B, polypeptide 1	8q21	Candidate gene assocaition	1	1	0	Nominal significance at P < 0.05 with both autistic traits and AS case-control studies	P15538			This gene encodes a member of the cytochrome P450 superfamily of enzymes participating in the conversion of progesterone to cortisol in the adrenal cortex.	FHI; CPN1; CYP11B; P450C11; FLJ36771; DKFZp686B05283	19598235	19598235	0	8506298, 10828825	19029289
DAB1	1600	disabled homolog 1 (Drosophila)	1p32-p31	Functional	1	0	0	Significant reduction of Dab-1 mRNA in superior frontal and cerebellar areas of autistic brains compared to control brains.	O75553			DAB1 serves as an intracellular adaptor for reelin signaling pathway	disabled-1	0	15820235	0	9338785, 10571241	19796633, 19272360
DAPK1	1612	death-associated protein kinase 1	9q34.1	Functional	1	0	0	Differential expression in lymphoid cell lines from individuals with autism spec trum disorders.	P53355			The encoded prtein binds ATP and it has calcium- and calmodulin-dependent protei n kinase activity.	DAPK, DKFZp781I035	0	16709250	0	10995806	16847012
DCUN1D1	54165	DCN1, defective in cullin neddylation 1, domain containing 1 (S. cerevisiae)	3q26.3	Functional	1	0	0	Positional candidate	Q96GG9		605905	The encoded protein plays a role in the neddylation pathway.	RP42, SCRO, Tes3, DCUN1L1	0	10777668	0	12796399	15988528
DCX	1641	doublecortex, lissencephaly, X-linked (doublecortin)	Xq22.3-q23	No Association	1	0	1	Positional and functional candidate	O43602		300121	The encoded protein binds to micrtubule and participates in neuronal migration.	DC, DBCN, LISX, SCLH, XLIS	0	11857568	11857568	9817918	16835924, 16869982
DDX11	1663	DEAD/H (Asp-Glu-Ala-Asp/His) box polypeptide 11 (CHL1-like helicase homolog, S. cerevisiae)	12p11	Functional	1	0	0	Differential expression in lymphoid cell lines from individuals with autism spec trum disorders.	Q96FC9			The encoded protein has ATP-dependent DNA helicase activity.	CHL1, KRG2, CHLR1, MGC9335, MGC133249	0	16709250	0	10882484	1662384
DHCR7	1717	7-dehydrocholesterol reductase	11q13.2-q13.5	Syndromic	4	0	0	Smith-Lemli-Opitz Syndrome	Q9UBM7			Delta7-sterol reductase is the ultimate enzyme of cholesterol biosynthesis in ve rtebrates	SLOS; delta-7-dehydrocholesterol reductase, delta7-sterol reductase	0	16761297	0	9653161, 9465114	16687448, 17197219
DIAPH3	81624	DIAPH3 diaphanous homolog 3 (Drosophila)	13q21.2	Rare single gene mutation	1	0	0	Compound heterozygocity with paternally inherited nonsynonymous substitution Pro614Thr in DIAPH3 and maternally inherited 10 Mb deletion at 13q21.2	Q9NSV4			Actin-nucelating protein involved in the process of neurite outgrowth	DRF3; diap3; mDia2	0	20308993	0	15668168, 16439214	19457867, 19380880, 18516090, 18044991
DISC1	27185	disrupted in schizophrenia 1	1q42.1	Genetic Association	1	1	0	Association	Q9NRI5				SCZD9, KIAA0457	17579608	17579608	0	12812986, 16293762	20139976, 20002455, 19778507,19191256, 19188535, 19077115, 18317464, 18762802, 17481393, 17825401
DLGAP2	9228	discs, large (Drosophila) homolog-associated protein 2	8p23	Rare single gene mutation	1	0	0	CNV	Q9P1A6			The encoded protein is a membrane-associated guanylate kinases localized at post synaptic density in neuronal cells	DAP2; SAPAP2	0	18252227	0	15207911	18055845
DLX1	1745	distal-less homeobox 1	2q32	Association	1	1	0	Genetic Association	P56177			The encoded protein is a homeobox transcription factor.		18728693	18728693	0	9247261, 9334308, 12050665	19026749, 19386638, 17678855, 16007083
DLX2	1746	distal-less homeobox 2	2q32	Association	1	1	0	Genetic Association	Q07687			The encoded protein is a homeobox transcription factor.	DLX-2, TES1, TES-1	18728693	18728693	0	7590232, 9247261, 9334308, 12050665	19026749, 19386638, 19212323, 18706405, 18697905,18562615, 17678855
DMD	1756	dystrophin (muscular dystrophy, Duchenne and Becker types)	Xp21.2	Syndromic autism	6	1	0	Duchenne muscular dystrophy	P11532			The dystrophin gene is highly complex, containing at least eight independent, tissue-specific promoters and two polyA-addition sites.	BMD; CMD3B; DXS142; DXS164; DXS206; DXS230; DXS239; DXS268; DXS269; DXS270; DXS2 72	19404256	16417872	0	3282674, 3319190, 8349731	19818935, 18056690, 18354150, 17108972, 17450125
DMPK	1760	dystrophia myotonica-protein kinase	19q13.3	Syndromic	1	0	0	Syndromic	Q09013			Serine/threonine kinase	DM; DM1; DMK; MDPK; DM1PK; MT-PK	0	18228241	0	14657503, 10976074, 9563950	18272483
DPP10	57628	Dipeptidyl-peptidase 10	2q14.1	Rare single gene mutation	1	0	0	rAut	Q8N608.1			Binds specific voltage-gated potassium channels and alters their expression and biophysical properties	DPL2; DPPY; DPRP3	0	18252227	0	15454437	18845608, 18276729, 16738002
DPP6	1804	dipeptidyl-peptidase 6	7q36.2	Rare single gene mutation	1	0	0	Single gene CNV	P42658.1			modulate the kinetics of transient A-type currents	DPPX; MGC46605	0	18252227	0	9811881	19372736, 18978958, 18667548, 18536731,18364354, 18276729, 16899223, 18084291
DPYD	1806	dihydropyrimidine dehydrogenase	1p22	Rare single gene mutation	1	0	0	CNV			274270	The encoded protein is a pyrimidine catabolic enzyme and participates in the ini tial and rate-limiting factor in the pathway of uracil and thymidine catabolism.	DHP; DPD; MGC70799; MGC132008	0	18252227	0	3335642	17065071
DRD3	1814	dopamine receptor D3	3q13.3	Genetic Association	1	1	0	Significant association of SNP rs167771 located in the DRD3 gene	P35462			This gene encodes the D3 subtype of dopamine receptor	D3DR; ETM1; FET1; MGC149204; MGC149205; DRD3	19058789	19058789	0	9354330, 11333982, 1362221	19017537, 17332411
EGR2	1959	early growth response 2 (Krox-20 homolog, Drosophila)	10q21.1	Functional	2	0	0	Differential expression in lymphoid cell lines from individuals with autism spec trum disorders.	P11161			The encoded protein is a Zn binding transcription factor.	CMT1D, CMT4E, KROX20, FLJ14547, DKFZp686J1957	0	16709250	0	8224839	19000991, 16702976
EIF4E	1977	eukaryotic translation initiation factor 4E	4q21-q25	Rare single gene mutation	1	0	0	In two unrelated families, autistic siblings and one of the parents harboured the same single nucleotide insertion at position -25 in the basal element of the EIF4E promoter.	P06730			Translation initiation factor involved in directing ribosomes to the cap structure of mRNAs	CBP; EIF4F; EIF4E1; EIF4EL1; MGC111573; EIF4E	0	19556253	0	7935836, 9561852, 9603962, 15541314, 11778052	18832563, 17277769
EN2	2020	engrailed homolog 2	7q36	Association/No Association	6	5	1	Replication of association	P19622	122089	131310	The encoded protein is a transcription factor.	AUTS1, engrailed 2, engrailed-2	18424904, 17948901, 17948868, 16252243, 15024396	15024396	12525552	7909289, 2907320	18562208,17320162, 16935268, 16267555
ESR1	2099	estrogen receptor 1	6q25.1	Candidate gene assocaition	1	1	0	Nominal significance at P < 0.05 with both autistic traits and AS case-control studies	P03372			Estrogen and its receptors are essential for sexual development and reproductive function, but also play a role in other tissues.	ER; ESR; Era; ESRA; NR3A1	19598235	19598235	0	10600740	19710308, 19707539, 19539635,18187655, 17046690
ESR2	2100	estrogen receptor 2 (ER beta)	14q23.2	Candidate gene assocaition	1	1	0	Nominal significance at P < 0.05 with both autistic traits and AS case-control studies	Q92731			This gene encodes a member of the family of estrogen receptors	Erb; ESRB; ESTRB; NR3A2; ER-BETA; ESR-BETA	19598235	19598235	0	12774124, 11799247, 10600740	19559077, 18187655
ESRRB	2103	estrogen-related receptor beta	Chromosome 14: 75,907,479-76,036,961	Genetic Association	1	1	0	Suggestive association signals (P < 1 X 10 -5) in the two discovery cohorts in GWA study	O95718		602167	steroid hormone receptor, transcription factor	DFNB35, ERR2, ERRb, ERRbeta, ERRbeta-2, ESRL2, NR3B2	19404256	19404256	0	9344655	18957414, 18555785, 18179891
F13A1	2162	coagulation factor XIII, A1 polypeptide	6p25.3-p24.3	Functional	1	0	0	Differential expression in lymphoid cell lines from individuals with autism spec trum disorders.	P00488			The encoded protein has protein-glutamine gamma-glutamyltransferase activity. I t participates in blood coagulation cascade.	F13A	0	16709250	0	8922891	1652556
FABP5	2171	fatty acid binding protein 5 (psoriasis-associated)	8q21.13	Rare single gene mutation / Genetic association	1	0	0	A mutation involving 340G>C (Gly114Arg) identified in FABP5	Q01469			The encoded protein binds long-chain fatty acids and other hydrophobic ligands	EFABP; E-FABP; PAFABP; PA-FABP; FABP5	0	20057506	0	10856918, 1512466	20014382, 19307565
FABP7	2173	fatty acid binding protein 7, brain	6q22-q23	Rare single gene mutation / Genetic association	1	0	0	A missense mutation, 376G>C (Val126Leu), identified in FABP7	O15540			The encoded protein binds long-chain fatty acids and other hydrophobic ligands	MRG; BLBP; FABPB; B-FABP	0	20057506	0	8161459, 11133151	19554614, 19540848, 19307565
FBXO33	254170	F-box protein 33	Chromosome 14: 38,936,718-38,971,371	Genetic Association	1	1	0	Suggestive association signals (P < 1 X 10 -5) in the two discovery cohorts in GWA study	Q7Z6M2		609103		BMND12, Fbx33, c14_5247	19404256	19404256	0	0	0
FBXO40	51725	F-box protein 40	Chromosome 3: 122,794,656-122,831,829	Rare Single Gene Mutation	1	0	0	CNV from GWA study	Q9UH90		609107	Ubiquitin-protein ligase	FBX40, KIAA1195, MGC129902, MGC129903	0	19404257	0	0	17928169
FEZF2	55079	FEZ family zinc finger 2	Chromosome 3: 62,330,387-62,334,230	Genetic Association	1	1	0	Suggestive association signals (P < 1 X 10 -5) in the two discovery cohorts in GWA study	Q8TBJ5		607414	Regulation of transcription	FEZ, FEZL, FKSG36, FLJ10142, TOF, ZFP312, ZNF312	19404256	19404256	0	12469125, 16157277	18678899, 18840685
FHIT	2272	fragile histidine triad gene	3p14.2	Rare single gene mutation	1	0	0	Single-gene CNV	P49789			encodes a diadenosine 5',5'''-P1,P3-triphosphate hydrolase involved in purine me tabolism.	FRA3B, AP3Aase	0	17363630	0	8598045, 8794732	17142325, 16187332
FLT1	2321	fms-related tyrosine kinase 1 (vascular endothelial growth factor/vascular perme ability factor receptor)	13q12	Functional	1	0	0	Differential expression in lymphoid cell lines from individuals with autism spec trum disorders.	P17948			The encoded protein is a receptor for vascular endothelial growth factor.	FLT, VEGFR1	0	16709250	0	10803575	16432214
FMR1	2332	fragile X mental retardation 1	Xq27.3	Syndromic autism	> 10	1	2	Autism in some individuals with fragile X syndrome.	Q06787	123464	309550	The encoded protein has RNA binding ability.	FMRP, FRAXA, MGC87458	9118347	9813775	14755444, 9358013	7688265	20799337, 20417602, 20439717, 20434996, 20159451, 20071534, 19166269, 18787232, 18760699, 16700053, 16780889, 16707258
FOXP2	93986	forkhead box P2	7q31	Genetic Association	6	2	4	Mixed	O15409	123519	605317	The encoded protein is a Zn binding transcription factor.	SPCH1, CAGH44, TNRC10, DKFZp686H1726	15108192, 15737702	15108192	15998549, 12655497, 12116195, 11894222	12192408	19907493, 19490899, 18972576, 18461604, 18328704, 18987363, 18052609,15877281
FRK	2444	fyn-related kinase	Chromosome 6: 116,369,389-116,488,614	Genetic Association	1	1	0	Suggestive association signals (P < 1 X 10 -5) in the two discovery cohorts in GWA study	P42685		606573	cytoplasmic tyrosine kinase	GTK, PTK5, RAK	19404256	19404256	0	10878015	19345329
FRMPD4	9758	FERM and PDZ domain containing 4	Xp22.2	Rare single gene mutation	1	0	0	Missense variants identified in ASD patients	Q14CM0			A multi-domain (WW, PDZ, FERM) containing protein that functions as a positive regulator of dendritic spine morphogenesis and density.	PDZD10; PDZK10; KIAA0316; MGC142260; MGC142262; FRMPD4, Preso	0	20479760	0		19118189
GABRA4	2557	gamma-aminobutyric acid (GABA) A receptor, alpha 4	4p12	Association	2	2	0	Strong	P48169	123677	137141	The encoded protein is a subunit of GABA-A receptor. Neurotransmission is predo minantly mediated by a gated chloride channel activity intrinsic to the receptor .	NA	16080114, 16770606	16080114	0	9582073	16091474
GABRB1	2560	gamma-aminobutyric acid (GABA) A receptor, beta	4p12	Association	2	2	0	Strong	P18505			The encoded protein is a subunit of GABA-A receptor. Neurotransmission is predo minantly mediated by a gated chloride channel activity intrinsic to the receptor .	NA	16080114, 16770606	16080114	0	2479580	16770606
GABRB3	2562	gamma-aminobutyric acid (GABA) A receptor, beta 3	15q11.2-q12	Association/No Association	10	8	2	Strong positional and functional candidate	P28472	147894	137192	The encoded protein is a subunit of GABA-A receptor. Neurotransmission is predo minantly mediated by a gated chloride channel activity intrinsic to the receptor .	MGC9051	19935738, 9545402, 11920158, 12092907, 12819446, 15389768, 15952184, 16674551	9545402	10490705, 10490715,	8557845	16835263
GALNT13	114805	UDP-N-acetyl-alpha-D-galactosamine:polypeptide N-acetylgalactosaminyltransferase 13 (GalNAc-T13)	2q23.3-q24.1	Rare single gene mutation	1	1	0	Rare variants in exonic deletion loci identified in both discovery and replication cohorts, but none of 2539 controls	Q8IUC8			A member of the UDP-N-acetyl-alpha-D-galactosamine:polypeptide N-acetylgalactosaminyltransferase family, which initiate O-linked glycosylation of mucins by the initial transfer of N-acetylgalactosamine (GalNAc) with an alpha-linkage to a serine or threonine residue.	GalNAc-T13; GalNAcT; GalNAc TRANSFERASE 13; pp-GalNAc-T13	19557195	19557195	0	12407114	18269347
GLO1	2739	glyoxalase I	6p21.3-p21.1	Association	3	1	2	Strong	Q04760		138750	The encoded protein mediates catalysis and formation of S-lactoyl-glutathione fr om methylglyoxal and reduced glutatione.	GLYI	15386471	15386471	17722011, 17346350	10807791	16244648, 16352396
GLRA2	2742	glycine receptor, alpha 2	Xp22.1-p21.3	Rare single gene mutation	1	0	0	Missense variants identified in ASD patients	P23416			A ligand-gated channel mediating a chloride-dependent inhibitory neurotransmission		0	20479760	0	9030628, 1703526	20106969, 19995593, 19924257
GNAS	2778	GNAS complex locus	20q13.3	No Association	1	0	1	Functional candidate	O60726			The encoded protein has GTPase activity.	NESP55 (OLD symbol), XL, AHO, GSA, GSP, POH, XL2, GPSA, NESP, SCG6, GNAS1, PHP1A , PHP1B, GNASXL, NESP55, C20orf45, MGC33735, XLalphas, dJ309F20.1.1, dJ806M20.3. 3	0	10860717	10860717	10716699	16831926
GPX1	2876	glutathione peroxidase 1	3p21.3	Genetic Association	1	1	0	Significant transmission disequilibrium (p=0.044) was found in the overall trans mission of the polyalanine repeat (ALA5, ALA6 and ALA7) in 103 trios of AD	P07203			It functions in the detoxification of hydrogen peroxide	GSHPX1; MGC14399; MGC88245; GPX1	19195803	19195803	0	9712879, 11545230	18853169, 18602426
GRIK2	2898	glutamate receptor, ionotropic, kainate 2	6q16.3-q21	Association/ No Association	3	2	1	Strong	Q13002	124223		The encoded protein is a subunit of kainate glutamate receptors.	EAA4, GLR6, GLUR6, MGC74427	11920157, 15389769,	11920157	17712621	9580260, 9108071	16855092, 16498632
GRIN2A	2903	glutamate receptor, ionotropic, N-methyl D-aspartate 2A	16p13.2	Association	1	1	0	Strong	Q12879			The encoded protein is a subunit of N-methyl-D-aspartate (NMDA) selective glutam ate receptors.	NR2A, NMDAR2A	15830322	15830322	0	2904125, 7512349	16862427, 16822975, 16814755, 16630839
GRM8	2918	glutamate receptor, metabotropic 8	7q31.3-q32.	Association/No Association	2	1	1	Genetic association	O00222	124298		The encoded protein has glutamate, GABA-B-like receptor activity.	GLUR8, mGlu8, GPRC1H, MGLUR8, FLJ41058, MGC126724	12676915	12676915	17955477	9016353	16280590
GRPR	2925	Gastrin-releasing peptide receptor	Xp22.2-p22.13	Rare single gene mutation	2	0	2	Cytogenetic evidence	P30550		305670	The encoded protein has G-protein coupled receptor activity.	NA	0	9259269	14729406, 9674911	1671171	16735043, 15670577
GSTM1	2944	glutathione S-transferase M1	1p13.3	Association	1	1	0	Association	P09488			The encoded protein has glutathione transferase activity.	MU, H-B, GST1, GTH4, GTM1, MU-1, GSTM1-1, MGC26563, GSTM1a-1a, GSTM1b-1b	16472391	16472391	0	9298582	16829689
HLA-A	3105	major histocompatibility complex, class I, A	6p21.3	Association	2	2	0	Association	P30443			The encoded protein belongs to the MHC class I receptor and plays a central role in the immune response.	HLA A	16720216, 14568232	16720216	0	3309677	16860448
HLA-DRB1	3123	major histocompatibility complex, class II, DR beta 1	6p21.3	Association	1	1	0	Strong Association	O00430	142490		The encoded protein belongs to the MHC class II receptor and plays a central rol e in the immune response.	DRB1, HLA DRB1, HLA-DR1B	8765331	8765331	0	1416553	16826237
HNRNPH2	3188	heterogeneous nuclear ribonucleoprotein H2 (H')	Xq22	Rare single gene mutation	1	0	0	Missense variants identified in ASD patients	U01923			Involved in pre-mRNA processing and other aspects of mRNA metabolism and transport.	FTP3; HNRPH'; HNRPH2; hnRNPH'	0	20479760	0	7499401	19734144
HOXA1	3198	homeobox A1	7p15.3	Association/No Association	8	2	6	Contradictory results	P49639	11125	142955	The encoded protein is a transcription factor that plays a major role in brainst em and cranial morphogenesis.	BSAS, HOX1, HOX1F, MGC45232	14960295, 11091361	11091361	14681917, 12908836, 12888798, 12414832, 11840501, 12210285	9463349	16549775, 16168961, 16155570
HOXB1	3211	homeobox B1	17q21.3	No Association	5	0	5	Functional candidate	P14653	126361		The encoded protein is a transcription factor.	HOX2, HOX2I, Hox-2.9, MGC116843, MGC116844, MGC116845	0	14681917	11091361, 14681917, 12888798, 12414832, 11840501,	9463349	16675951
HRAS	3265	v-Ha-ras Harvey rat sarcoma viral oncogene homolog	11p15.5	Association	3	3	0	Interesting functional candidate	P01112	142619		The encoded protein binds GTP and has GTPase activity.	HRAS1, K-ras, N-ras, RASH1, c-bas/has	8832771, 7485261, 8098541	8098541	0	11017143	16568090, 16835863
HS3ST5	222537	heparan sulfate (glucosamine) 3-O-sulfotransferase 5	Chromosome 6: 114,485,071-114,490,735	Genetic Association	1	1	0	Suggestive association signals (P < 1 X 10 -5) in the two discovery cohorts in GWA study	Q8IZT8		609407	sulfotransferases	3-OST-5, 3OST5, HS3OST5, NBLA04021	19404256	19404256	0	12740361	17482450, 17588944
HSD11B1	3290	hydroxysteroid (11-beta) dehydrogenase 1	1q32-q41	candidate gene assocaition	1	1	0	Nominal significance at P < 0.05 with AS case-control studies	P28845			The encoded protein is a microsomal enzyme that catalyzes the conversion of the stress hormone cortisol to the inactive metabolite cortisone. It can also catalyze the reverse reaction, the conversion of cortisone to cortisol.	HDL; 11-DH; HSD11; HSD11B; HSD11L; SDR26C1; MGC13539; 11-beta-HSD1; HSD11B1	19598235	19598235	0	7670488, 11739957, 12858176	19690925, 19651257, 19546565, 15717863
HTR1B	3351	5-hydroxytryptamine (serotonin) receptor 1B	6q13	Genetic Association	1	1		Undertransmission of the HTR1B haplotypes containing alleles -161G and -261A at HTR1B gene to ASD in Brazilian male patients of European ancestry.	P28222			The encoded protein belongs to G-protein coupled receptor 1 family.	S12; 5-HT1B; HTR1D2; HTR1DB; 5-HT1DB; HTR1B	19038234	19038234		8091214, 9603521	19055689, 16400147
HTR2A	3356	5-hydroxytryptamine (serotonin) receptor 2A	13q14-q21	No Association	1	0	1	Functional candidate	P28223			The encoded protein is a seretonin receptor.	HTR2, 5-HT2A	0	11920848	11920848	7630250	16648340
HTR3A	3359	5-hydroxytryptamine (serotonin) receptor 3A	11q23.1	Genetic association	1	1	0	Most significant association was found at rs1150220 (HTR3A)	P46098			ligand-gated ion channel receptor	HTR3; 5HT3R; 5-HT-3; 5-HT3A; 5-HT3R; HTR3A	19184136	19184136	0	12867984, 1718042	19232378, 19095802, 18622264
HTR3C	170572	5-hydroxytryptamine (serotonin) receptor 3, family member C	3q27.1	Genetic Association	1	1	0	family-based association analysis	Q8WXA8			Ligand-gated ion channel receptor		19035560	19035560	0	12801637	18466097, 18761359
HTR7	3363	5-hydroxytryptamine (serotonin) receptor 7 (adenylate cyclase-coupled)	10q21-q24	No Association	1	0	1	Functional candidate	P34969		182137	The encoded protein is a seretonin receptor.		0	10490701	10490701	9892311	16192982
IL1RAPL1	11141	interleukin 1 receptor accessory protein-like 1	Xp22.1-p21.3	Rare single gene mutation	1	0	0	Rare single gene mutation	Q9NZN1			may regulate calcium-dependent exocytosis	IL1R8; MRX21; MRX34; OPHN4; IL1RAPL; TIGIRR-2	0	18005360	0	12783849	20096586, 18801879, 18467032, 17502602
IMMP2L	83943	IMP2 inner mitochondrial membrane peptidase-like (S. cerevisiae)	7q31	Rare single gene mutation / Genetic association	1	0	0	Cytogenetic evidence	Q96HJ2			The encoded protein has serine-like peptidase activity.	IMP2	0	11254443	0	11254443	16239145
INPP1	3628	inositol polyphosphate-1-phosphatase	2q32	Association	1	1	0	Nominal association	P49441			The encoded protein belongs to the phosphatidylinositol signaling pathways.		14627686	14627686	0	9682271	16787706
ITGA4	3676	integrin, alpha 4 (antigen CD49D, alpha 4 subunit of VLA-4 receptor)	2q31.3	Association	3	3	0	Replication of association	P13612			Cell adhesion molecules	IA4; CD49D; MGC90518; ITGA4	18348195, 18846500, 19259978	18348195	0		17689671, 18697840
ITGB3	3690	integrin, beta 3 (platelet glycoprotein IIIa, antigen CD61)	17q21.32	Association	1	1	0	Strong	P05106	150377		The encoded protein is the integrin beta chain beta 3 that participates in cell adhesions and cell-surface mediated signalling.	CD61, GP3A,GPIIIa	16724005	16724005	0	10195947	16721604
ITGB7	3695	integrin, beta 7	12q13.13	Functional	1	0	0	Differential expression in lymphoid cell lines from individuals with autism spec trum disorders.	P26010			The encoded protein is a receptor for fibronectin.	NA	0	16709250	0	7687523	15699171
JMJD1C	221037	jumonji domain containing 1C	10q21.2	Rare single gene mutation	1	0	0	Cytogenetic	Q15652			histone demethylase, tumor suppressor	TRIP8, FLJ14374, KIAA1380, RP11-10C13.2, DKFZp761F0118	0	17290275	0	14533015	17353003
KCNMA1	3778	potassium large conductance calcium-activated channel, subfamily M, alpha member 1	10q22.3	Rare single gene mutation	1	0	0	Cytogenetic evidence	Q12791			The encoded protein is the pore forming alpha subunit of large conductance, volt age and calcium-sensitive potassium channels. These channels are fundamental to the control of smooth muscle tone and neuronal excitability.	SLO; BKTM; MaxiK; SAKCA; KCa1.1; MGC71881; SLO-ALPHA; DKFZp686K1437	0	16946189	0	9284303, 11090555	18345016, 18316727, 18250327, 17635926, 17209047, 16738211, 17040919, 17068255
KIAA1586	57691	KIAA1586	6p12.1	Rare single gene mutation	1	1	0	Rare variants in exonic deletion loci identified in both discovery and replication cohorts, but none of 2539 controls	Q8N303			Unknown	FLJ30162	19557195	19557195	0
LAMB1	3912	laminin, beta 1	7q22	Association	1	1	0	Suggestive association	P07942			The encoded protein belongs to the family of extracellular matrix glycoproteins. It is a subunit of laminin 1, laminin 2 and laminin 6.	CLM	15128462	15128462	0
LRFN5	145581	leucine rich repeat and fibronectin type III domain containing 5	Chromosome 14: 41,146,523-41,443,498	Genetic Association	1	1	0	Suggestive association signals (P < 1 X 10 -5) in the two discovery cohorts in GWA study	Q96NI6				C14orf146, DKFZp686G0210, FIGLER8, FLJ30803, SALM5	19404256	19404256	0	0	0
LRRC1	55227	leucine rich repeat containing 1	Chromosome 6: 53,767,737-53,896,878	Genetic Association	1	1	0	Suggestive association signals (P < 1 X 10 -5) in the two discovery cohorts in GWA study	Q9BTT6		608195	cell adhesion	LANO; FLJ10775; FLJ11834; dJ523E19.1; LRRC1	19404256	19404256	0	11440998	18498353
LZTS2	84445	leucine zipper, putative tumor suppressor 2	Chromosome 10: 102,746,955-102,757,583	Genetic Association	1	1	0	Suggestive association signals (P < 1 X 10 -5) in the two discovery cohorts in GWA study	Q9BRK4		610454	tumor suppressor	RP11-108L7.8, KIAA1813, LAPSER1	19404256	19404256	0	17000760	18490357
MACROD2	140733	MACRO domain containing 2	20p12.1	Genetic Association	1	1	0	The marker rs4141463, located within MACROD2, crossed the genome-wide association significance threshold of P < 5 x 10(-8)					C20orf133	20663923	20663923	0	17586838	20195527, 18593871
MAOA	4128	monoamine oxidase A	Xp11.3	Functional	1	0	0	Interesting functional candidate	P21397		309850	The encoded protein degrades amine neurotransmitters.	NA	0	12919132	0	7792602	16856146, 16801953
MAP2	4133	microtubule-associated protein 2	2q34-q35	Functional	1	0	0	Reduce neuronal expression of MAP2 in dorsolateral prefrontal cortex in adult au tistic individuals	P11137		157130	The encoded protein is a member of microtubule-associated protein family.	MAP2A, MAP2B, MAP2C, DKFZp686I2148	0	15541002	0	1465130	18572149, 17984326
MARK1	4139	MAP/microtubule affinity-regulating kinase 1	1q41	Genetic association	1	1	0	Haplotype rs12740310*C-rs3737296*G-rs12410279*A was overtransmitted (P(corrected)= 0.0016), with a relative risk for autism of 1.8 in homozygous carriers.	Q9P0L2			The encoded protein is Ser/Thr kinase that phosphorylates the microtubule-associated proteins tau, MAP2, and MAP4 on their microtubule-binding domain, causing their dissociation from microtubules and increased microtubule dynamics.	MARK; KIAA1477; MGC126512; MGC126513; MARK1	18492799	18492799	0	7706316, 9108484,	19536824, 17507984, 17924967, 16803889
MBD1	4152	methyl-CpG binding domain protein 1	18q21	Rare single gene mutation	1	0	0	Missense mutations in the coding region of MBD1	Q9UIS9			The encoded protein binds specifically to methylated DNA and can repress transcription	RFT; PCM1; CXXC3	0	19921286	0	2004419, 11371345	18385101
MBD3	53615	ethyl-CpG binding domain protein 3	19p13.3	Rare single gene mutation	1	0	0	Several variations including a missense mutation, R23M, within the methyl- CpG-binding domain identified in two affected half brothers in an African-American family.	O95983			The encoded protein is is a subunit of the NuRD, a multisubunit complex containing nucleosome remodeling and histone deacetylase activities	MBD3	0	19921286	0	11274056, 10947852	19888462
MBD4	8930	methyl-CpG binding domain protein 4	3q21-q22	Rare single gene mutation	1	0	0	Multiple missense mutations	O95243			The encoded protein forms a complex with MLH1, binds to methyl-CpG-containing DNA, has homology to bacterial DNA repair glycosylases/lyases, and displays endonuclease activity.	MED1	0	19921286	0	10499592, 12130785	19829383, 19109892
MCPH1	79648	microcephalin 1	8p23.1	Rare single gene mutation	1	0	0	Recurrent copy number variations	Q8NEM0				MCT; BRIT1; FLJ12847	0	19793310	0	12046007, 16151009	19925808, 19546241, 18716609
MDGA2	161357	MAM domain containing glycosylphosphatidylinositol anchor 2	14q21.3	Rare single gene mutation	1	1	0	Rare variants in exonic deletion loci identified in both discovery and replication cohorts, but none of 2539 controls	Q7Z553			The encoded protein is a member of the immunoglobulin domain cell adhesion molecule subfamily and and is proposed to be involved in regulating neuronal migration and axonal guidance	MAMDC1; c14_5286	19557195	19557195	0	15019943	18762592
MECP2	4204	Methyl CpG binding protein 2	Xq28	Syndromic autism	>10	1	1	Seconday autism in a subset of individuals with Rett syndrome.	P51608	130376	300005	The encoded protein has methylation-dependent transcriptional repressor activity . It is also involved in regulation of RNA splicing.	RTS, RTT, PPMX, MRX16, MRX79, AUTSX3, DKFZp686A24160	15211631	10508514	11464249	9620804, 9038338	21118894, 21085180, 21068835, 21118894, 19628041, 19000991, 18820302, 18817733, 18773074, 18678449, 17464364, 16682435, 16199017
MED12	9968	mediator complex subunit 12	Xq13	No Association	2	0	2	Mixed	Q93074	130388	300188	The encoded protein is believed to be a co-activator of the thyroid hormone rece ptor and involved in thyroid hormone signal transduction.	HOPA, OPA1, CAGH45, TNRC11, TRAP230, KIAA0192	0	11840515	11039861, 11840515	10480376	16712834, 16538184
MEF2C	4208	myocyte enhancer factor 2C	5q14	Rare single gene mutation	1	0	0	Missence mutations and small deletions identified in ASD	Q06413			The encoded protein is a transcription factor involved in diverse developmental processes including hematopoiesis, cardiogenesis and neurogenesis.		0	20412115	0	9162005, 9069290	20513142, 20434996, 19109909, 18278031, 18599437
MET	4233	met proto-oncogene (hepatocyte growth factor receptor)	7q31	Candidate Gene Association	5	5	0	Genetic association of a common C allele in the promoter region of MET	P08581	138055	164860	The encoded protein is the hepatocyte growth factor receptor with tyrosine-kinas e activity.	HGFR; RCCP2, Oncogene MET; met proto-oncogene	19681062, 19548256, 19255034, 19002214, 17053076	17053076	0	8898205, 8906793, 11114738, 11430831	20080979, 19732764, 19595710, 19226509, 18664491, 17696172, 17065554, 16201992
MTF1	4520	metal-regulatory transcription factor 1	1p33	Association	1	1	0	Interesting functional candidate	O14945			The encoded protein is Zn binding transcription factor that mediates regulation of metallothionein genes.	MTF-1	15446388	15446388	0	11306562	16612977
MYO16	23026	myosin XVI	Chromosome 13: 108,046,501-108,658,356	Genetic Association	1	1	0	Suggestive association signals (P < 1 X 10 -5) in the two discovery cohorts in GWA study	Q9Y6X6			motor protein, actin binding	RP11-54H7.1, KIAA0865, MYR8, Myo16b	19404256	19404256	0	11588169	17029291
NBEA	26960	neurobeachin	13q13	Rare single gene mutation	1	0	0	Cytogenetic evidence	Q5W0E6		604889	The encoded protein has protein kinase A binding activity.	BCL8B, LYST2	0	12746398	0	11102458	17215302, 16244873
NDNL2	56160	necdin-like 2	15q13.1	Positional	1	0	0	Positional	Q96MG7		608243	The encoded protein plays a role in regulation of cell growth.	HCA4, MAGEG1, MAGEL3	0	11782285	0	10347180	16707790
NF1	4763	neurofibromin 1 (neurofibromatosis, von Recklinghausen disease, Watson disease)	17q11.2	Syndromic autism	3	1	2	Seconday autism in a subset of individuals with Neurofibromatosis type I.	P21359	131566		The encoded protein has Ras GTPase activity and appears to be a negative regulat or of cell proliferation.	Neurofibromin, WSS, NFNS, VRNF, DKFZp686J1293	15389774	15389774	11449390, 10581497	2121371, 11793011	20106617, 19475561, 18984165, 16644864
NLGN1	22871	neuroligin 1	Chromosome 3: 174,805,083-175,483,810	Rare Single Gene Mutation	1	1	0	CNV from GWA study	Q8N2Q7		600568	Cell adhesion	KIAA1070, MGC45115	19404257	19404257	0	9278515, 8576240, 7736595	19323994, 18579781
NLGN3	54413	neuroligin 3	Xq13.1	Rare single gene mutation	6	1	4	Mutations in ASD siblings	Q9NZ94	131609	300336	Neuroligins are cell-adhesion molecules at the postsynaptic side of the synapse .	HNL3, ASPGX1, AUTSX1, KIAA1480	16077734	12669065	18189281, 15274046, 15389766, 16508939	12669065	17823315, 16434405, 16300891, 16298368
NLGN4X	57502	neuroligin 4, X-linked	Xp22.32-p22.31	Single gene mutation	8	3	3	Strong	Q8N0W4	131611	300427	Neuroligins are cell-adhesion molecules at the postsynaptic side of the synapse .	HLNX, HNLX, NLGN, NLGN4, ASPGX2, AUTSX2, KIAA1260, MGC22376	19726642, 16077734, 19598235, 19645625	12669065	15274046, 15389766, 16508939	12669065	18434543, 18231125, 18227507, 16624946
NLGN4Y	22829	neuroligin 4, Y-linked	Yq11.221	No Association	1	0	1	No evidence	Q8NFZ3		400028	Neuroligins are cell-adhesion molecules at the postsynaptic side of the synapse .	KIAA0951	0	16077734	16077734	12815422
NOS1AP	9722	nitric oxide synthase 1 (neuronal) adaptor protein	1q23.3	Rare single gene mutation	1	0	0	A non-synonymous variation, D423N, segregated with the presence of ASD	O75052			An adaptor protein serving as regulator of neuronal nitric oxide synthase	CAPON	0	20602773	0	16648850, 11086993, 9459447	20357130, 18337493
NOS2A	4843	nitric oxide synthase 2A (inducible, hepatocytes)	17q11.2-q12	Genetic Association	1	1	0	Transmission disequilibrium test (TDT) and haplotype analysis in 151 Korean ASD trios.	P35228			This gene encodes a nitric oxide synthase which is inducible by a combination o f lipopolysaccharide and certain cytokines.	NOS; INOS; NOS2; HEP-NOS	18563708	18563708	0	6373578, 8577713	18650379, 18639532
NPAS2	4862	neuronal PAS domain protein 2	2q11.2	Association	1	1	0	Genetic association	Q99743	152091		The protein encoded by this gene is a member of the basic helix-loop-helix (bHLH )-PAS family of transcription factors.		17264841	17264841	0	11439184	17457720, 17417633
NRCAM	4897	neuronal cell adhesion molecule	7q31.1-q31.2	Association	2	1	1	A case-control study of 18 single nucleotide polymorphisms	Q6QRP2	152204		The encoded protein is a cell-cell adhesion molecule that participates in neuro nal outgrowth and guidance processes.	KIAA0343, NgCAM-related cell adhesion molecule, NrCAM protein, NrCAM-short, brav o	18664314	18664314	15128462	8947556	16357171
NRP2	8828	neuropilin 2	2q33.3	Association	1	1	0	Genetic Association	O60462			High affinity receptor for semaphorins 3C, 3F, VEGF-165 and VEGF-145 isoforms of VEGF, and the PLGF-2 isoform of PGF	NP2, NPN2, PRO2714, MGC126574, VEGF165R2	17427189	17427189	0	9288754, 10707971	17259176, 17329436, 17443771
NRXN1	9378	neurexin 1	2p16.3	Rare single gene mutation	1	1	0	CNV; Single-gene mutation; association	P58400		600565	Neuronal celll adhesion molecule		17034946	17322880	0	9325340, 12796785	19822762, 19567877, 18945720, 18179900, 17360903, 17237775, 16846852
NTNG1	22854	netrin G1	1p13.3	Syndromic autism	1	0	0	Rett syndrome	Q9Y2I2			Netrin G1 (NTNG1) belongs to a conserved family of proteins that act as axon gui dance cues during vertebrate nervous system development	Lmnt1; KIAA0976	0	15870826	0	14595443	18384956, 17785411, 16980967, 17973922
NTRK1	4914	neurotrophic tyrosine kinase, receptor, type 1	1q21-q22	Candidate gene assocaition	1	1	0	Nominal significance at P < 0.05 with both autistic traits and AS case-control studies	P04629			A membrane-bound receptor that, upon neurotrophin binding, phosphorylates itself and members of the MAPK pathway.	MTC; TRK; TRK1; TRKA; p140-TrkA; DKFZp781I14186	19598235	19598235	0	8145823, 8878481, 10330344	19755105, 19755102, 18323418
NTRK3	4916	neurotrophic tyrosine kinase, receptor, type 3	15q25	Candidate gene assocaition	1	1	0	Nominal significance at P < 0.05 with both autistic traits and AS case-control studies	Q16288			A membrane-bound receptor that, upon neurotrophin binding, phosphorylates itself and members of the MAPK pathway	TRKC; gp145(trkC); NTRK3	19598235	19598235	0	1653651, 8145824,8208292, 12424382	19370765, 18428117, 18363858
ODF3L2	284451	outer dense fiber of sperm tails 3-like 2	19p13.3	Rare single gene mutation	1	1	0	Rare variants in exonic deletion loci identified in both discovery and replication cohorts, but none of 2539 controls	Q3SX64			Unknown	C19orf19; FLJ40059; MGC129962; MGC129963	19557195	19557195	0
OPHN1	4983	oligophrenin 1	Xq12	Rare single gene mutation	1	0	0	Missense variants identified in ASD patients	Q7Z2H1			A Rho-GTPase-activating protein involved in cell migration and outgrowth of axons and dendrites.	OPN1; MRX60; ARHGAP41	0	20479760	0	12807966	20528889, 19487570, 19481455, 17728457
OPRM1	4988	opioid receptor, mu 1	6q24-q25	Functional	1	0	0	Weak, Functional	P35372		600018	The encoded protein has mu-opioid receptor activity.	MOR1, OPRM, KIAA0403	0	15218152	0	9087409	16806307
OR1C1	26188	olfactory receptor, family 1, subfamily C, member 1	1q44	Rare single gene mutation	1	1	0	Rare variants in exonic deletion loci identified in both discovery and replication cohorts, but none of 2539 controls	Q15619			odorant receptor	OR1-42; ORL211; TPCR27; HSTPCR27; OR1.5.10	19557195	19557195	0		18989455
OXTR	5021	oxytocin receptor	3p25	Genetic Association	5	5	0	Replication of association	P30559	132219		The encoded protien has oxytocin receptor activity.	OT-R	19777562, 18207134, 15992526, 17383819, 17893705	15992526	0	9548257, 1313946, 7577971	19845972, 18356275, 17890818, 16439458, 16807802, 17287729
PARK2	5071	Parkinson disease (autosomal recessive, juvenile) 2, parkin	Chromosome 6: 161,688,442-163,068,793	Rare Single Gene Mutation	1	0	0	CNV from GWA study	O60260		602544	Ubiquitin-protein ligase	AR-JP, LPRS2, PDJ, PRKN	0	19404257	0	11439185, 11431533, 10888878, 9560156	19228951, 19339245
PCDH10	57575	protocadherin 10	4q28.3	Rare single gene mutation	1	0	0	Rare single gene mutation	Q9P2E7			encodes a cadherin-related neuronal receptor thought to play a role in the estab lishment and function of specific cell-cell connections in the brain.	PCDH19; OL-PCDH; KIAA1400; MGC133344; DKFZP761O2023	0	18621663	0	9920663	18644894, 17721516
PCDH19	57526	protocadherin 19	Xq13.3	Rare single gene mutation	1	0	0	Missense variants identified in ASD patients	Q8TAB3			A calcium-dependent cell-adhesion protein that is primarily expressed in the brain	EFMR	0	20479760	0	18469813	19752159, 19615992
PCDH9	5101	protocadherin 9	13q14.3-q21.1	Rare single gene mutation	1	0	0	CNV	Q9HC56			encodes a cadherin-related neuronal receptor that localizes to synaptic junction s		0	18252227	0	9787079	17614211
PDZD4	57595	PDZ domain containing 4	Xq28	Rare single gene mutation				Missense mutations identified in ASD individulas.	Q76G19			Expressed inthe brain	LU1; PDZK4; PDZRN4L		20479760		15138636, 15077175
PER1	5187	period homolog 1 (Drosophila)	17p13.1-p12	Genetic association	1	1	0	Genetic association	O15534	152502		This gene is a member of the Period family of genes and is expressed in a circad ian pattern in the suprachiasmatic nucleus, the primary circadian pacemaker in t he mammalian brain.	PER, hPER, RIGUI, MGC88021	17264841	17264841	0	10613504	17535553, 17482552
PIK3CG	5294	phosphoinositide-3-kinase, catalytic, gamma polypeptide	7q22.3	Association	1	1	0	Nominal association	P48736			The encoded protein has phosphatidylinositol 3-kinase activity.	PI3K, PIK3, PI3CG, PI3Kgamma	14627686	14627686	0	10669418	16840732, 16339142
PITX1	5307	paired-like homeodomain 1	5q31	Association	1	1	0	Genetic association	P78337.2			Transcription factoe	BFT; POTX; PTX1	18053270	18053270	0	10049363	17710856, 15960973
PLN	5350	phospholamban	6q22.1	Rare single gene mutation	1	0	0	CNV	P26678			The encoded protein is an inhibitor of cardiac muscle sarcoplasmic reticulum Ca (2+)-ATPase in the unphosphorylated state, but inhibition is relieved upon phosp horylation of the protein.		0	18252227	0	10555147, 12610310	18355039
PON1	5444	paraoxonase 1	7q21.3	Association	1	1	0	Strong Association	P27169			The encoded protein hydrolyzes a broad spectrum of organophosphate substrates and a number of aromatic carboxylic acid esters.	ESA, PON	16027737	16027737	0	10831526	16297937
PPP1R3F	89801	protein phosphatase 1, regulatory (inhibitor) subunit 3F	Xp11.23	Rare single gene mutation	1	0	0	Missense mutations identified in ASD individulas.	Q6ZSY5			Regulatory subunit of type-1 protein phosphatase	HB2E	0	20479760	0	11948623
PRKCB1	5579	protein kinase C, beta 1	16p11.2	Association/No Association	2	1	1	Genetic Association	P05771	152829		The encoded protein is one of the PKC family members.	PKCB, PRKCB, PRKCB2, MGC41878, PKC-beta	16027742	16027742	17167344	9202063	16567829
PSMD10	5716	proteasome (prosome, macropain) 26S subunit, non-ATPase, 10	Xq22.3	Rare single gene mutation	1	0	0	Missense variants identified in ASD patients	O75832			This gene encodes a non-ATPase proteasome subunit of the 19S regulator involved in protein degradation	gankyrin, p28	0	20479760	0	10613832, 12525503, 16023600	19446323, 19412159
PTCHD1	139411	patched domain containing 1	Xp22.11	Rare single gene mutation	1	0	0	Single gene CNV	Q96NR3			hedgehog receptor activity	LJ30296; MGC149798; PTCHD1	0	18252227	0	0	0
PTEN	5728	phosphatase and tensin homolog (mutated in multiple advanced cancers 1)	10q23.3	Syndromic autism	2	1	0	Autism in some individuals with extreme macrocephaly. Autistic features in some individuals with germline PTEN mutations.	P60484		601728	The encoded protein has phosphatidylinositol-3,4,5-trisphosphate 3-phosphatase a ctivity.	BZS, MHAM, TEP1, MMAC1, PTEN1, MGC11227	15805158	11496368	0	9778245, 9593664, 9072974	17427195, 16873694, 16871217, 16871217
PTGS2	5743	prostaglandin-endoperoxide synthase 2 (prostaglandin G/H synthase and cyclooxyge nase)	1q25.2-q25.3	Genetic Association	1	1	0	Association study in 151 Korean family trios	P35354			The encoded protein is a key enzyme for prostaglandin synthesis. It has prostagl andin-endoperoxide synthase activity.	COX2, COX-2, PHS-2, PGG/HS, PGHS-2, hCox-2	18579107	18579107	0	8945508, 8637870	16442500, 16484297
RAB39B	116442	RAB39B, member RAS oncogene family	Xq28	Rare single gene mutation / Genetic association	1	0	0	Mutations segregate with the disease in two families	Q96DA2			A member of small GTPases involved in vesicular trafficking		0	20159109	0	12438742	17970049
RAI1	10743	retinoic acid induced 1	17p11.2	Functional & Positional	1	0	0	Increased expression of RAI1 in a male child with autism containg a duplication of approximately 3.3 Mb on chromosome 17p11.2	Q7Z5J4			Mutations in RAI1 causes Smith-Magenis Syndrome	SMS; SMCR; KIAA1820; MGC12824	0	17334992	0	12652298	20188345, 19492091, 19752160, 19319603, 18285828
RAPGEF4	11069	Rap guanine nucleotide exchange factor (GEF) 4	2q31-q32	Rare single gene mutation; No Association	1	0	0	Rare nonsynonymous variants segregate with the autistic phenotype	Q53QY2			The encoded protein acts as a cAMP sensor and mediates cAMP-dependent, protein k inase A-independent exocytosis.	CGEF2, EPAC2, Nbla00496, CAMP-GEFII	0	14593429	0	9856955	19734897, 18660803, 18824540, 18565730, 16412482, 15598877
RB1CC1	9821	RB1-inducible coiled-coil 1	8q11	Rare single gene mutation	1	0	0	CNV	Q8TDY2			FIP200 as a crucial signaling component to coordinately regulate different cellu lar events by its interaction with multiple signaling pathways.	CC1; FIP200; DRAGOU14	0	18252227	0	12068296	18036779
REEP3	221035	receptor accessory protein 3	10q21.3	Rare single gene mutation	1	0	0	Cytogenetic				one of the six human homologs of yeast Yop1p, a probable regulator of cellular v esicle trafficking between the endoplasmatic reticulum and the Golgi network.	C10orf74	0	17290275	0	11278413, 16469703	17290275
RELN	5649	Reelin	7q22	Association/No Association	8	4	4	Strong positional and functional candidate	P78509	153122		The encoded protein is a large extracellular matrix protein that plays a pivotal role in the neuronal cell migration and in the development of neural connection s.	RL	16311013, 15558079, 11317216, 17955477	11317216	15048648, 15048647, 14515139, 12192627	10612399, 9651544, 7715726	19952965, 18547243, 18448255, 17881522, 16858396, 16807322, 16807322,
RFWD2	64326	ring finger and WD repeat domain 2	Chromosome 1: 174,180,590-174,442,993	Rare Single Gene Mutation	1	0	0	CNV from GWA study	Q8NHY2		608067	Ubiquitin-protein ligase	RP11-318C24.3, COP1, FLJ10416, RNF200	0	19404257	0	11509693, 9659918, 8001131, 1423630	19165148, 19061637, 18815134
RHOXF1	158800	Rhox homeobox family, member 1	Chromosome X: 119,127,053-119,133,875	Genetic Association	1	1	0	Suggestive association signals (P < 1 X 10 -5) in the two discovery cohorts in GWA study	Q8NHV9		300446	Transcription factor	MGC119030, MGC119033, OTEX, PEPP1	19404256	19404256	0	11980563
RIMS3	9783	regulating synaptic membrane exocytosis 3	1pter-p22.2	Rare Single Gene Mutation	1	0	0	Mutation screening identified five inherited coding variants from ASD probands (n=512) that were absent in controls (n=1,161)	Q9UJD0			Synaptic protein essential for vesicle fusion and normal neurotransmitter release	NIM3; RIM3; KIAA0237; RIMS3	0	19546099	0	10748113	18490030
ROBO1	6091	roundabout, axon guidance receptor, homolog 1 (Drosophila)	3p12	Functional	1	0	0	Differential expression in lymphoid cell lines from individuals with autism spec trum disorders.	Q9Y6N7			The encoded protein is an axon guidance receptor and a cell adhesion receptor.	SAX3, DUTT1, FLJ21882, MGC131599, MGC133277	0	16709250	0	11734623	16690755, 16700909
RPL10	6134	ribosomal protein L10	Xq28	Rare single gene mutation	1	0	0	Single gene mutation	P27635			This gene encodes a ribosomal protein that is a component of the 60S subunit. Th e protein belongs to the L10E family of ribosomal proteins.	QM; NOV; DXS648; DXS648E; FLJ23544; FLJ27072; DKFZp686J1851	0	16940977	0	12138090	18187511, 17761675, 16741966, 16627977
RPS6KA2	6196	ribosomal protein S6 kinase, 90kDa, polypeptide 2	6q27	Rare single gene mutation	1	0	0	CNV	Q15349			This gene encodes a member of the RSK (ribosomal S6 kinase) family of serine/thr eonine kinases.	SK; HU-2; RSK3; p90-RSK3; pp90RSK3; MAPKAPK1C; S6K-alpha; S6K-alpha2	0	18252227	0	7623830	16878154
SCN1A	6323	sodium channel, voltage-gated, type I, alpha subunit	2q24.3	Rare single gene mutation	1	0	0	Rare single-gene mutation	P35498			voltage-gated ion channel essential for the generation and propagation of action potentials, chiefly in nerve and muscle.	Na(v)1.1, FEB3; NAC1; SCN1; SMEI; HBSCI; GEFSP2; Nav1.1	0	12610651	0	10742094, 11359211	17105460, 17537961, 17507202
SCN2A	6326	sodium channel, voltage-gated, type II, alpha subunit	2q23-q24	Rare single gene mutation	1	0	0	single-gene mutation	Q99250			voltage-gated ion channel essential for the generation and propagation of action potentials, chiefly in nerve and muscle.	HBA; NAC2; HBSCI; HBSCII; Nav1.2; SCN2A1; SCN2A2; Na(v)1.2	0	12610651	0	12829783, 11371648, 11343648	17544618, 17468742
SDC2	6383	syndecan 2 (heparan sulfate proteoglycan 1, cell surface-associated, fibroglycan )	8q22-q23	Functional	1	0	0	Functional candidate	P34741		142460	The encoded protein is s a transmembrane (type I) heparan sulfate proteoglycan a nd is a member of the syndecan proteoglycan family.	HSPG, HSPG1, SYND2	0	9259269	0	9660868	16574663
SEMA5A	9037	sema domain, seven thrombospondin repeats (type 1 and type 1-like), transmembran e domain (TM) and short cytoplasmic domain, (semaphorin) 5A	5p15.2	Functional	1	0	0	Expression profiling	Q13591			The encoded protein is a member of semaphorin protein family that plays role in axonal guidance during neural development.	Semaphorin 5A, semF, SEMAF	0	17028446	0	15743826	15603739, 15218527
SEZ6L2	26470	SEZ6L2 seizure related 6 homolog (mouse)-like 2	16p11.2	Rare single gene mutation	1	0	0	Autism-specific R386H amino acid substitution in exon 7 of the seizure-related gene SEZ6L2 in the initial screen; no replication	Q6UXD5			transmembrane receptor	PSK-1; FLJ90517; SEZ6L2	0	19242545	0	16814779	19260139, 18184952, 18156158
SH3KBP1	30011	SH3-domain kinase binding protein 1	Xp22.1-p21.3	Rare single gene mutation	1	0	0	Missense variants identified in ASD inividuals	Q96B97			An adaptor protein that facilitates protein-protein interactions	HSB1; CIN85; GIG10; HSB-1; MIG18; CD2BP3; SH3KBP1	0	20479760	0	11894095	20551902, 20451383
SHANK2	22941	SH3 and multiple ankyrin repeat domains 2	11q13.3-q13.4	Rare single gene mutation	1	0	0	Microdeletion and missence mutations were identified in ASD cases but not in controls	Q9UPX8			Shank proteins contain multiple domains for protein-protein interactions and function as molecular scaffolds in the postsynaptic density (PSD).	CORTBP1; CTTNBP1; ProSAP1; SPANK-3; SHANK2	0	20473310	0	10806096, 15632121	20347015, 20080968, 19805144
SHANK3	85358	SH3 and multiple ankyrin repeat domains 3	22q13.3	Rare single gene mutation	4	0	2	Haploinsufficiency of SHANK3 can cause a monogenic form of autism	Q9BYB0			The gene encodes a synaptic adaptor protein.	PSAP2, PROSAP2, SPANK-2, KIAA1650	0	17173049	19566951, 19384346	10527873	20385823, 20186804, 19635471, 19703901, 19481056, 19454329, 19481056, 18615476, 18563458, 18272690, 17999366, 16439662
SLC1A1	6505	solute carrier family 1 (neuronal/epithelial high affinity glutamate transporter, system Xag), member 1	9p24	Candidate gene association	1	0	0	FBAT revealed nominally significant association	P43005			High-affinity glutamate transporter	EAAC1; EAAT3	0	19360657	0	9542890, 8785064, 1280334, 11242046	20155310
SLC25A12	8604	solute carrier family 25 (mitochondrial carrier, Aralar), member 12	2q24	Association/No Association	6	2	4	Replication of association	O75746	153567	603667	The encoded protein has solute:cation symporter activity.	ARALAR, ARALAR1	16263864, 15056512	15056512	19913066, 16648338, 16205742, 17151801	9722566	18180767, 17894412, 17497669, 16269409
SLC4A10	57282	solute carrier family 4, sodium bicarbonate transporter-like, member 10	2q23-q24	Rare single gene mutation	1	0	0	Single gene CNV	Q6U841			inorganic anion exchanger activity		0	17363630	0	14592810	15283764
SLC6A4	6532	solute carrier family 6 (neurotransmitter transporter, serotonin), member 4	17q11.1-q12	Association/No Association	9	6	3	Strong functional candidate	P31645	153781	182138	The encoded protein has serotonin transporter activity, serotonin:sodium symport er activity.	HTT, 5HTT, OCD1, SERT, 5-HTT, hSERT	9152989, 15995945, 15635668, 15094787, 12232775, 11920155	9152989	16616719, 15882779, 15108191	12130784	16534505
SLC6A8	6535	solute carrier family 6 (neurotransmitter transporter, creatine), member 8	Xq28	Syndromic autism	1	0	0	Autism in some individuals with creatine deficiency syndrome.	P48029			The encoded protein has creatine:sodium symporter activity.	CT1, CRTR, MGC87396	0	16601898	0	11326334	16763899, 16601898
SLC9A6	10479	solute carrier family 9 (sodium/hydrogen exchanger), member 6	Xq26.3	Syndromic autism	1	0	0	A 9-bp deletion within exon 8 segragates with severe mental retardation and autism in a large family	Q92581			Regulation of endosomal pH and volume	MRSA; NHE6; KIAA0267	0	20395263	0	18342287	20130086, 19471312
SLC9A9	285195	solute carrier family 9 (sodium/hydrogen exchanger), member 9	3q24	Rare single gene mutation	1	0	0	Rare single gene mutation	Q8IVB4		608396	enzyme involved in pH regulation	NHE9	0	18621663	0	14569117	18937294, 18057008, 17005858
ST7	7982	suppression of tumorigenicity 7	7q31.1-q31.3	Rare single gene mutation	1	0	0	Cytogenetic evidence	Q5CZ72		600833	The encoded protein is a tumor supressor.	HELG, RAY1, SEN4, TSG7, ETS7q, FAM4A1, DKFZp762O2113	0	10889047	0	11279520	11279520
STK39	27347	serine threonine kinase 39 (STE20/SPS1 homolog, yeast)	2q24.3	Association	1	1	0	Genetic association	Q9UEW8.2			This gene encodes a serine/threonine kinase implicated in the cellular stress re sponse pathway	DCHT; PASK; SPAK; DKFZp686K05124	18348195	18348195	0	12386165	19114657, 18843116, 18270262
SUCLG2	8801	succinate-CoA ligase, GDP-forming, beta subunit	3p14.1	Rare single gene mutation	1	1	0	Rare variants in exonic deletion loci identified in both discovery and replication cohorts, but none of 2539 controls	Q96I99			A mitochondrial matrix enzyme	G-BETA	19557195	19557195	0	19631775	18452512
SYT17	51760	synaptotagmin XVII	Chromosome 16: 19,074,715-19,186,055	Genetic Association	1	1	0	Suggestive association signals (P < 1 X 10 -5) in the two discovery cohorts in GWA study	Q9BSW7				B/K protein	19404256	19404256	0	0	0
TDO2	6999	tryptophan 2,3-dioxygenase	4q31-q32	Association	1	1	0	Medium	P48775			The encoded protein plays an essential role in tryptophan metabolism.	TDO, TPH2, TRPO	14755447	14755447	0	10580097	16448631, 15780178
TH	7054	tyrosine hydroxylase	11p15.5	No Association	2	0	3	Functional	O43816	136176	191290	The encoded protein has tyrosine 3-monooxygenase activity.	TYH	0	7786965	7786965, 11857571, 8098541	14216443, 6152036	16854387
TMEM195	392636	hypothetical protein LOC392636	7p21.1	Rare single gene mutation	1	0	0	Single-gene CNV	Q6ZNB7			putative sterol desaturase	FLJ16237 (name in primary reference); MGC131748	0	17363630	0	17363630	17363630
TPH2	121278	tryptophan hydroxylase 2	12q21.1	Association/No Association	2	1	1	Mixed	Q8IWU9			The encoded protein has tryptophan 5-monooxygenase activity	NTPH, FLJ37295	15768392	15768392	16581035	15247473, 15629698	16864580, 16847459 , 16801378
TSC1	7248	tuberous sclerosis 1	9q34	Syndromic autism	> 10	0	0	Seconday autism in a subset of individuals with tuberous sclerosis. Inactivatin g mutations in either TSC1 or TSC2 are responsible for this syndrome.	Q59IT9		605284	The encoded protein is a tumor supressor.	LAM, TSC, KIAA0243, MGC86987	0	9813776	0	9580671, 12172555	18794346, 18067135, 17376623,16286931, 15362169
TSC2	7249	tuberous sclerosis 2	16p13.3	Syndromic autism	>10	1	0	Seconday autism in a subset of individuals with tuberous sclerosis. Inactivatin g mutations in either TSC1 or TSC2 are responsible for this syndrome.	P49815		191092	The encoded protein is a tumor supressor.	LAM, TSC4, FLJ43106	14627686	9813776	0	9580671, 12172555	18794346, 18568033, 18568033, 16286931, 15362169
TSN	7247	translin	2q21.1	Functional	1	0	0	Interesting functional candidate	Q15631			The encoded protein has RNA binding activity.	TRSLN, BCLF-1, REHF-1	0	16495445	0	7663511	16707626
TSPAN7	7102	tetraspanin 7	Xp11.4	Rare single gene mutation	1	0	0	Missense variants identified in ASD probands	P41732			A cell surface glycoprotein with a role in the control of neurite outgrowth	A15; MXS1; CD231; MRX58; CCG-B7; TM4SF2; TALLA-1; TM4SF2b; DXS1692E	0	20479760	0	10655063, 12070254	19339915
UBE2H	7328	ubiquitin-conjugating enzyme E2H (UBC8 homolog, yeast)	7q32	Association	1	1	0	Strong	P62256			The encoded protein has ubiquitin-protein ligase activity.	ubiquitin carrier protein H, ubiquitin-conjugating enzyme E2H, ubiquitin-conjuga ting enzyme E2H (homologous to yeast UBC8), ubiquitin-protein ligase HUBC8, UBCH , UBCH2, E2-20K	14639049	14639049	0
UBE3A	7337	ubiquitin protein ligase E3A (human papilloma virus E6-associated protein, Angel man syndrome)	15q11-q13	Association /Rare single gene mutation	2	1	0	Positional and functional candidate	Q05086			The encoded protein has ubiquitin-protein ligase activity.	AS, ANCR, E6-AP, HPVE6A, EPVE6AP, FLJ26981	11543639	11543639	0	8988171	20211139, 20212164, 19430469, 19404257, 18846633, 16754645, 16575182
VASH1	22846	vasohibin 1	Chromosome 14: 76,298,285-76,319,107	Genetic Association	1	1	0	Suggestive association signals (P < 1 X 10 -5) in the two discovery cohorts in GWA study	Q7L8A9		609011		KIAA1036	19404256	19404256	0	0	19179360, 19204325
WNK3	65267	WNK lysine deficient protein kinase 3	Xp11.23-p11.21	Rare single gene mutation	1	0	0	Missense mutations identified in ASD individulas.	Q9BYP7			The encoed protein belongs to the family of serine-threonine kinases that functions as modulator of diverse ion transport pathways.	PRKWNK3; FLJ30437; FLJ42662; KIAA1566; WNK3	0	20479760	0	16275911	19932740 , 18550832, 18498374
WNT2	7472	wingless-type MMTV integration site family member 2	7q31	Association/No association	4	2	2	Weak	P09544	138055	147870	The encoded protein is a constituent of the extracellular matrix and plays a rol e in signal transduction.	IRP, INT1L1	19895723, 11449391	11449391	15048648, 11840514	8951051	16621466, 16554359
XPC	7508	xeroderma pigmentosum, complementation group C	3p25	Syndromic autism	2	0	0	Autism associated with xeroderma pigmentosum.	Q01831		278720	The encoded protein plays a role in DNA excision repair.	XP3, XPCC	0	9804340	0	16860562, 15964983, 15882621,10604143	7675084, 8756644, 9372924

## Sheet: SZGene Database
Supplementary Table S1b. SZGene Database Gene list of all genes implicated in Schizophrenia (received from database curators 3/3/11)
HUGO Symbol	Entrez Gene Name
AANAT	aralkylamine N-acetyltransferase
ABAT	4-aminobutyrate aminotransferase
ABCA13	ATP-binding cassette, sub-family A (ABC1), member 13
ABCB1	ATP-binding cassette, sub-family B (MDR/TAP), member 1
ACE	angiotensin I converting enzyme (peptidyl-dipeptidase A) 1
ACOX1	acyl-CoA oxidase 1, palmitoyl
ACP1	acid phosphatase 1, soluble
ACSL4	acyl-CoA synthetase long-chain family member 4
ACSL6	acyl-CoA synthetase long-chain family member 6
ACSM1	acyl-CoA synthetase medium-chain family member 1
ADA	adenosine deaminase
ADAM12	ADAM metallopeptidase domain 12
ADCYAP1	adenylate cyclase activating polypeptide 1 (pituitary)
ADH1B	alcohol dehydrogenase 1B (class I), beta polypeptide
ADORA2A	adenosine A2a receptor
ADRA1A	adrenergic, alpha-1A-, receptor
ADRA2A	adrenergic, alpha-2A-, receptor
ADRBK2	adrenergic, beta, receptor kinase 2
ADSL	adenylosuccinate lyase
ADSS	adenylosuccinate synthase
AGAP1	ArfGAP with GTPase domain, ankyrin repeat and PH domain 1
AGER	advanced glycosylation end product-specific receptor
AGPAT1	1-acylglycerol-3-phosphate O-acyltransferase 1 (lysophosphatidic acid acyltransferase, alpha)
AGT	angiotensinogen (serpin peptidase inhibitor, clade A, member 8)
AHCY	adenosylhomocysteinase
AHI1	Abelson helper integration site 1
AIF1	allograft inflammatory factor 1
AK1	adenylate kinase 1
AKR1D1	aldo-keto reductase family 1, member D1 (delta 4-3-ketosteroid-5-beta-reductase)
AKT1	v-akt murine thymoma viral oncogene homolog 1
ALDH1A1	aldehyde dehydrogenase 1 family, member A1
ALDH1A2	aldehyde dehydrogenase 1 family, member A2
ALDH1A3	aldehyde dehydrogenase 1 family, member A3
ALDH3B1	aldehyde dehydrogenase 3 family, member B1
ALDH5A1	aldehyde dehydrogenase 5 family, member A1
ALK	anaplastic lymphoma receptor tyrosine kinase
ALOX12	arachidonate 12-lipoxygenase
AMACR	alpha-methylacyl-CoA racemase
ANK3	ankyrin 3, node of Ranvier (ankyrin G)
ANKK1 (includes EG:255239)	ankyrin repeat and kinase domain containing 1
ANKRD12	ankyrin repeat domain 12
AP3B1	adaptor-related protein complex 3, beta 1 subunit
AP3B2	adaptor-related protein complex 3, beta 2 subunit
AP3D1	adaptor-related protein complex 3, delta 1 subunit
AP3M1	adaptor-related protein complex 3, mu 1 subunit
AP3M2	adaptor-related protein complex 3, mu 2 subunit
APC	adenomatous polyposis coli
APOD	apolipoprotein D
APOE	apolipoprotein E
APOL1	apolipoprotein L, 1
APOL2	apolipoprotein L, 2
APOL3 (includes EG:80833)	apolipoprotein L, 3
APOL4	apolipoprotein L, 4
APOL5	apolipoprotein L, 5
APOL6	apolipoprotein L, 6
APP	amyloid beta (A4) precursor protein
AQP4	aquaporin 4
AR	androgen receptor
ARHGAP18	Rho GTPase activating protein 18
ARHGAP21	Rho GTPase activating protein 21
ARHGEF10	Rho guanine nucleotide exchange factor (GEF) 10
ARMC3	armadillo repeat containing 3
ARNTL	aryl hydrocarbon receptor nuclear translocator-like
ARNTL2	aryl hydrocarbon receptor nuclear translocator-like 2
ARRB2	arrestin, beta 2
ARSA	arylsulfatase A
ARVCF	armadillo repeat gene deleted in velocardiofacial syndrome
ASCL1	achaete-scute complex homolog 1 (Drosophila)
ASPM	asp (abnormal spindle) homolog, microcephaly associated (Drosophila)
ASTN1	astrotactin 1
ATE1	arginyltransferase 1
ATF4	activating transcription factor 4 (tax-responsive enhancer element B67)
ATF5	activating transcription factor 5
ATF6B	activating transcription factor 6 beta
ATG9B	ATG9 autophagy related 9 homolog B (S. cerevisiae)
ATM	ataxia telangiectasia mutated
ATN1	atrophin 1
ATP2B2	ATPase, Ca++ transporting, plasma membrane 2
ATP6V1G2	ATPase, H+ transporting, lysosomal 13kDa, V1 subunit G2
ATXN1	ataxin 1
ATXN3	ataxin 3
AZIN1	antizyme inhibitor 1
BAG3	BCL2-associated athanogene 3
BAK1	BCL2-antagonist/killer 1
BASP1	brain abundant, membrane attached signal protein 1
BAT1	HLA-B associated transcript 1
BAT2	HLA-B associated transcript 2
BCL2L11	BCL2-like 11 (apoptosis facilitator)
BCL2L13	BCL2-like 13 (apoptosis facilitator)
BDNF	brain-derived neurotrophic factor
BHLHE41	basic helix-loop-helix family, member e41
BIK	BCL2-interacting killer (apoptosis-inducing)
BIN3	bridging integrator 3
BLOC1S1	biogenesis of lysosomal organelles complex-1, subunit 1
BLOC1S2	biogenesis of lysosomal organelles complex-1, subunit 2
BLOC1S3	biogenesis of lysosomal organelles complex-1, subunit 3
BMP6	bone morphogenetic protein 6
BRCA2	breast cancer 2, early onset
BRD1	bromodomain containing 1
BSG	basigin (Ok blood group)
BTBD9	BTB (POZ) domain containing 9
C10ORF120	chromosome 10 open reading frame 120
C18ORF1	chromosome 18 open reading frame 1
C1ORF198	chromosome 1 open reading frame 198
C1QTNF3	C1q and tumor necrosis factor related protein 3
C1QTNF6	C1q and tumor necrosis factor related protein 6
C2ORF86	chromosome 2 open reading frame 86
C4A	complement component 4A (Rodgers blood group)
CABIN1	calcineurin binding protein 1
CACNA1A	calcium channel, voltage-dependent, P/Q type, alpha 1A subunit
CACNA1C	calcium channel, voltage-dependent, L type, alpha 1C subunit
CACNA1F	calcium channel, voltage-dependent, L type, alpha 1F subunit
CALCA	calcitonin-related polypeptide alpha
CALM1	calmodulin 1 (phosphorylase kinase, delta)
CALY	calcyon neuron-specific vesicular protein
CANX	calnexin
CAP2	CAP, adenylate cyclase-associated protein, 2 (yeast)
CAPZA2	capping protein (actin filament) muscle Z-line, alpha 2
CARTPT	CART prepropeptide
CASP10	caspase 10, apoptosis-related cysteine peptidase
CBS	cystathionine-beta-synthase
CCDC60	coiled-coil domain containing 60
CCK	cholecystokinin
CCKAR	cholecystokinin A receptor
CCKBR	cholecystokinin B receptor
CCL2	chemokine (C-C motif) ligand 2
CCR3	chemokine (C-C motif) receptor 3
CCR5	chemokine (C-C motif) receptor 5
CD14	CD14 molecule
CD38	CD38 molecule
CD3D	CD3d molecule, delta (CD3-TCR complex)
CD4	CD4 molecule
CD48	CD48 molecule
CDC42SE2	CDC42 small effector 2
CDC45	cell division cycle 45 homolog (S. cerevisiae)
CDK5	cyclin-dependent kinase 5
CECR2	cat eye syndrome chromosome region, candidate 2
CELF5	CUGBP, Elav-like family member 5
CELSR1	cadherin, EGF LAG seven-pass G-type receptor 1 (flamingo homolog, Drosophila)
CFB	complement factor B
CFLAR	CASP8 and FADD-like apoptosis regulator
CHAT	choline O-acetyltransferase
CHGA	chromogranin A (parathyroid secretory protein 1)
CHGB	chromogranin B (secretogranin 1)
CHI3L1	chitinase 3-like 1 (cartilage glycoprotein-39)
CHL1	cell adhesion molecule with homology to L1CAM (close homolog of L1)
CHN2	chimerin (chimaerin) 2
CHODL	chondrolectin
CHRFAM7A	CHRNA7 (cholinergic receptor, nicotinic, alpha 7, exons 5-10) and FAM7A (family with sequence similarity 7A, exons A-E) fusion
CHRM1	cholinergic receptor, muscarinic 1
CHRM5	cholinergic receptor, muscarinic 5
CHRNA2	cholinergic receptor, nicotinic, alpha 2 (neuronal)
CHRNA3	cholinergic receptor, nicotinic, alpha 3
CHRNA4	cholinergic receptor, nicotinic, alpha 4
CHRNA5	cholinergic receptor, nicotinic, alpha 5
CHRNA7	cholinergic receptor, nicotinic, alpha 7
CHRNB2	cholinergic receptor, nicotinic, beta 2 (neuronal)
CHRNB3	cholinergic receptor, nicotinic, beta 3
CIT	citron (rho-interacting, serine/threonine kinase 21)
CLDN10	claudin 10
CLDN11	claudin 11
CLDN14	claudin 14
CLDN5	claudin 5
CLINT1	clathrin interactor 1
CLOCK	clock homolog (mouse)
CLTCL1	clathrin, heavy chain-like 1
CLU	clusterin
CMYA5 (includes EG:202333)	cardiomyopathy associated 5
CNO	cappuccino homolog (mouse)
CNP	2',3'-cyclic nucleotide 3' phosphodiesterase
CNR1	cannabinoid receptor 1 (brain)
CNTF	ciliary neurotrophic factor
CNTN1	contactin 1
CNTN2	contactin 2 (axonal)
COG2	component of oligomeric golgi complex 2
COMT	catechol-O-methyltransferase
COX6A1	cytochrome c oxidase subunit VIa polypeptide 1
CPLX1	complexin 1
CPLX2	complexin 2
CPXM2	carboxypeptidase X (M14 family), member 2
CRP	C-reactive protein, pentraxin-related
CRY2	cryptochrome 2 (photolyase-like)
CSF2RA (includes EG:1438)	colony stimulating factor 2 receptor, alpha, low-affinity (granulocyte-macrophage)
CSF2RA (includes EG:1438)	colony stimulating factor 2 receptor, alpha, low-affinity (granulocyte-macrophage)
CSF2RB	colony stimulating factor 2 receptor, beta, low-affinity (granulocyte-macrophage)
CSNK1D	casein kinase 1, delta
CSNK1E	casein kinase 1, epsilon
CSNK2A1	casein kinase 2, alpha 1 polypeptide
CSPG5	chondroitin sulfate proteoglycan 5 (neuroglycan C)
CTLA4	cytotoxic T-lymphocyte-associated protein 4
CTNNA1	catenin (cadherin-associated protein), alpha 1, 102kDa
CTNNA2	catenin (cadherin-associated protein), alpha 2
CYP1A2	cytochrome P450, family 1, subfamily A, polypeptide 2
CYP21A2	cytochrome P450, family 21, subfamily A, polypeptide 2
CYP26B1	cytochrome P450, family 26, subfamily B, polypeptide 1
CYP26C1	cytochrome P450, family 26, subfamily C, polypeptide 1
CYP2C18	cytochrome P450, family 2, subfamily C, polypeptide 18
CYP2D6	cytochrome P450, family 2, subfamily D, polypeptide 6
CYP2E1	cytochrome P450, family 2, subfamily E, polypeptide 1
CYP3A4	cytochrome P450, family 3, subfamily A, polypeptide 4
CYP3A5	cytochrome P450, family 3, subfamily A, polypeptide 5
CYP4F8	cytochrome P450, family 4, subfamily F, polypeptide 8
DAAM1	dishevelled associated activator of morphogenesis 1
DAAM2	dishevelled associated activator of morphogenesis 2
DAO	D-amino-acid oxidase
DAOA	D-amino acid oxidase activator
DBH	dopamine beta-hydroxylase (dopamine beta-monooxygenase)
DBI	diazepam binding inhibitor (GABA receptor modulator, acyl-CoA binding protein)
DBP	D site of albumin promoter (albumin D-box) binding protein
DCDC2	doublecortin domain containing 2
DDC	dopa decarboxylase (aromatic L-amino acid decarboxylase)
DDO	D-aspartate oxidase
DDR1	discoidin domain receptor tyrosine kinase 1
DGCR14	DiGeorge syndrome critical region gene 14
DGCR2	DiGeorge syndrome critical region gene 2
DGCR6	DiGeorge syndrome critical region gene 6
DGCR6L	DiGeorge syndrome critical region gene 6-like
DGCR8	DiGeorge syndrome critical region gene 8
DGKH	diacylglycerol kinase, eta
DISC1	disrupted in schizophrenia 1
DKK1	dickkopf homolog 1 (Xenopus laevis)
DKK4	dickkopf homolog 4 (Xenopus laevis)
DLG1	discs, large homolog 1 (Drosophila)
DLG4	discs, large homolog 4 (Drosophila)
DLGAP1	discs, large (Drosophila) homolog-associated protein 1
DLX1	distal-less homeobox 1
DNMT3B	DNA (cytosine-5-)-methyltransferase 3 beta
DPM1	dolichyl-phosphate mannosyltransferase polypeptide 1, catalytic subunit
DPYSL2	dihydropyrimidinase-like 2
DRD1	dopamine receptor D1
DRD2	dopamine receptor D2
DRD3	dopamine receptor D3
DRD4	dopamine receptor D4
DRD5	dopamine receptor D5
DTNBP1 (includes EG:84062)	dystrobrevin binding protein 1
DUSP6	dual specificity phosphatase 6
DYM	dymeclin
DYNC1I2	dynein, cytoplasmic 1, intermediate chain 2
DYNLL1	dynein, light chain, LC8-type 1
EBF3	early B-cell factor 3
EEF1E1	eukaryotic translation elongation factor 1 epsilon 1
EFNB2	ephrin-B2
EGF	epidermal growth factor
EGFR	epidermal growth factor receptor
EGLN1	egl nine homolog 1 (C. elegans)
EGR1	early growth response 1
EGR2	early growth response 2
EGR3	early growth response 3
EGR4	early growth response 4
EHMT2	euchromatic histone-lysine N-methyltransferase 2
EIF2B1	eukaryotic translation initiation factor 2B, subunit 1 alpha, 26kDa
EIF2B2	eukaryotic translation initiation factor 2B, subunit 2 beta, 39kDa
EIF2B3	eukaryotic translation initiation factor 2B, subunit 3 gamma, 58kDa
EIF2B4	eukaryotic translation initiation factor 2B, subunit 4 delta, 67kDa
EIF2B5	eukaryotic translation initiation factor 2B, subunit 5 epsilon, 82kDa
ENKUR	enkurin, TRPC channel interacting protein
ENO1	enolase 1, (alpha)
ENO2	enolase 2 (gamma, neuronal)
ENTPD4	ectonucleoside triphosphate diphosphohydrolase 4
EPHA6	EPH receptor A6
ERBB2	v-erb-b2 erythroblastic leukemia viral oncogene homolog 2, neuro/glioblastoma derived oncogene homolog (avian)
ERBB3	v-erb-b2 erythroblastic leukemia viral oncogene homolog 3 (avian)
ERBB4	v-erb-a erythroblastic leukemia viral oncogene homolog 4 (avian)
ESD	esterase D
ESR1	estrogen receptor 1
ESR2	estrogen receptor 2 (ER beta)
FAAH	fatty acid amide hydrolase
FABP3	fatty acid binding protein 3, muscle and heart (mammary-derived growth inhibitor)
FABP7	fatty acid binding protein 7, brain
FAM126B	family with sequence similarity 126, member B
FAM19A5	family with sequence similarity 19 (chemokine (C-C motif)-like), member A5
FAM3B	family with sequence similarity 3, member B
FAM83F	family with sequence similarity 83, member F
FAM8A1	family with sequence similarity 8, member A1
FBP1	fructose-1,6-bisphosphatase 1
FCRL3	Fc receptor-like 3
FEZ1	fasciculation and elongation protein zeta 1 (zygin I)
FGA	fibrinogen alpha chain
FGF1	fibroblast growth factor 1 (acidic)
FGF14	fibroblast growth factor 14
FGF18	fibroblast growth factor 18
FGF2	fibroblast growth factor 2 (basic)
FGF20	fibroblast growth factor 20
FGF22	fibroblast growth factor 22
FGFBP1	fibroblast growth factor binding protein 1
FGFR1	fibroblast growth factor receptor 1
FGFR2	fibroblast growth factor receptor 2
FGFR3	fibroblast growth factor receptor 3
FGFR4	fibroblast growth factor receptor 4
FKBP1A	FK506 binding protein 1A, 12kDa
FKBP5	FK506 binding protein 5
FLNB	filamin B, beta
FMO3	flavin containing monooxygenase 3
FN1	fibronectin 1
FOXP2	forkhead box P2
FXN	frataxin
FXYD1	FXYD domain containing ion transport regulator 1
FXYD2	FXYD domain containing ion transport regulator 2
FXYD5	FXYD domain containing ion transport regulator 5
FXYD6	FXYD domain containing ion transport regulator 6
FYN	FYN oncogene related to SRC, FGR, YES
FZD3	frizzled homolog 3 (Drosophila)
FZD4	frizzled homolog 4 (Drosophila)
GABBR1	gamma-aminobutyric acid (GABA) B receptor, 1
GABRA1	gamma-aminobutyric acid (GABA) A receptor, alpha 1
GABRA2	gamma-aminobutyric acid (GABA) A receptor, alpha 2
GABRA5	gamma-aminobutyric acid (GABA) A receptor, alpha 5
GABRA6	gamma-aminobutyric acid (GABA) A receptor, alpha 6
GABRB2	gamma-aminobutyric acid (GABA) A receptor, beta 2
GABRE	gamma-aminobutyric acid (GABA) A receptor, epsilon
GABRG2	gamma-aminobutyric acid (GABA) A receptor, gamma 2
GABRP	gamma-aminobutyric acid (GABA) A receptor, pi
GAD1	glutamate decarboxylase 1 (brain, 67kDa)
GAD2	glutamate decarboxylase 2 (pancreatic islets and brain, 65kDa)
GAL3ST1	galactose-3-O-sulfotransferase 1
GALC	galactosylceramidase
GAP43	growth associated protein 43
GAPDH (includes EG:2597)	glyceraldehyde-3-phosphate dehydrogenase
GAS2L1	growth arrest-specific 2 like 1
GATC	glutamyl-tRNA(Gln) amidotransferase, subunit C homolog (bacterial)
GC	group-specific component (vitamin D binding protein)
GCLM	glutamate-cysteine ligase, modifier subunit
GDNF	glial cell derived neurotrophic factor
GFAP	glial fibrillary acidic protein
GFRA1	GDNF family receptor alpha 1
GFRA2	GDNF family receptor alpha 2
GFRA3	GDNF family receptor alpha 3
GFRA4	GDNF family receptor alpha 4
GH1	growth hormone 1
GJA5	gap junction protein, alpha 5, 40kDa
GJA8	gap junction protein, alpha 8, 50kDa
GJA9	gap junction protein, alpha 9, 59kDa
GJC2	gap junction protein, gamma 2, 47kDa
GLS	glutaminase
GLUL	glutamate-ammonia ligase
GMPR	guanosine monophosphate reductase
GNAL	guanine nucleotide binding protein (G protein), alpha activating activity polypeptide, olfactory type
GNAO1	guanine nucleotide binding protein (G protein), alpha activating activity polypeptide O
GNAS	GNAS complex locus
GNAZ	guanine nucleotide binding protein (G protein), alpha z polypeptide
GNB1L	guanine nucleotide binding protein (G protein), beta polypeptide 1-like
GNB3	guanine nucleotide binding protein (G protein), beta polypeptide 3
GNPAT	glyceronephosphate O-acyltransferase
GNRH1	gonadotropin-releasing hormone 1 (luteinizing-releasing hormone)
GOT2	glutamic-oxaloacetic transaminase 2, mitochondrial (aspartate aminotransferase 2)
GP6	glycoprotein VI (platelet)
GPC6	glypican 6
GPM6A	glycoprotein M6A
GPR109A	G protein-coupled receptor 109A
GPR158	G protein-coupled receptor 158
GPR78	G protein-coupled receptor 78
GPX1	glutathione peroxidase 1
GRB2	growth factor receptor-bound protein 2
GRIA1	glutamate receptor, ionotropic, AMPA 1
GRIA2	glutamate receptor, ionotropic, AMPA 2
GRIA3	glutamate receptor, ionotrophic, AMPA 3
GRIA4	glutamate receptor, ionotrophic, AMPA 4
GRID1	glutamate receptor, ionotropic, delta 1
GRIK1	glutamate receptor, ionotropic, kainate 1
GRIK2	glutamate receptor, ionotropic, kainate 2
GRIK3	glutamate receptor, ionotropic, kainate 3
GRIK4	glutamate receptor, ionotropic, kainate 4
GRIK5	glutamate receptor, ionotropic, kainate 5
GRIN1	glutamate receptor, ionotropic, N-methyl D-aspartate 1
GRIN2A	glutamate receptor, ionotropic, N-methyl D-aspartate 2A
GRIN2B	glutamate receptor, ionotropic, N-methyl D-aspartate 2B
GRIN2C	glutamate receptor, ionotropic, N-methyl D-aspartate 2C
GRIN2D	glutamate receptor, ionotropic, N-methyl D-aspartate 2D
GRIN3A	glutamate receptor, ionotropic, N-methyl-D-aspartate 3A
GRIP1	glutamate receptor interacting protein 1
GRM2	glutamate receptor, metabotropic 2
GRM3	glutamate receptor, metabotropic 3
GRM4	glutamate receptor, metabotropic 4
GRM5	glutamate receptor, metabotropic 5
GRM7	glutamate receptor, metabotropic 7
GRM8	glutamate receptor, metabotropic 8
GSC2	goosecoid homeobox 2
GSK3B	glycogen synthase kinase 3 beta
GSN	gelsolin
GSS	glutathione synthetase
GSTM1	glutathione S-transferase mu 1
GSTO1	glutathione S-transferase omega 1
GSTP1	glutathione S-transferase pi 1
GSTT1	glutathione S-transferase theta 1
GSTT2	glutathione S-transferase theta 2
GTF2H4	general transcription factor IIH, polypeptide 4, 52kDa
HAL	histidine ammonia-lyase
HAT1	histone acetyltransferase 1
HDAC10	histone deacetylase 10
HDAC3	histone deacetylase 3
HDAC4	histone deacetylase 4
HIRA	HIR histone cell cycle regulation defective homolog A (S. cerevisiae)
HIST1H2AH	histone cluster 1, H2ah
HIST1H2BJ (includes EG:8970)	histone cluster 1, H2bj
HK1	hexokinase 1
HMBS	hydroxymethylbilane synthase
HMX3	H6 family homeobox 3
HNMT	histamine N-methyltransferase
HOMER1	homer homolog 1 (Drosophila)
HOMER2	homer homolog 2 (Drosophila)
HOMER3	homer homolog 3 (Drosophila)
HORMAD2	HORMA domain containing 2
HP	haptoglobin
HRH1	histamine receptor H1
HRH2	histamine receptor H2
HS3ST2	heparan sulfate (glucosamine) 3-O-sulfotransferase 2
HS6ST3 (includes EG:266722)	heparan sulfate 6-O-sulfotransferase 3
HSD17B7	hydroxysteroid (17-beta) dehydrogenase 7
HSPA12A	heat shock 70kDa protein 12A
HSPA1A	heat shock 70kDa protein 1A
HSPA1B	heat shock 70kDa protein 1B
HSPA1L	heat shock 70kDa protein 1-like
HSPA5	heat shock 70kDa protein 5 (glucose-regulated protein, 78kDa)
HTR1A	5-hydroxytryptamine (serotonin) receptor 1A
HTR1B	5-hydroxytryptamine (serotonin) receptor 1B
HTR1D	5-hydroxytryptamine (serotonin) receptor 1D
HTR2A	5-hydroxytryptamine (serotonin) receptor 2A
HTR2C	5-hydroxytryptamine (serotonin) receptor 2C
HTR3A	5-hydroxytryptamine (serotonin) receptor 3A
HTR3B	5-hydroxytryptamine (serotonin) receptor 3B
HTR3C	5-hydroxytryptamine (serotonin) receptor 3, family member C
HTR3D	5-hydroxytryptamine (serotonin) receptor 3 family member D
HTR3E	5-hydroxytryptamine (serotonin) receptor 3, family member E
HTR4	5-hydroxytryptamine (serotonin) receptor 4
HTR5A	5-hydroxytryptamine (serotonin) receptor 5A
HTR6	5-hydroxytryptamine (serotonin) receptor 6
HTR7	5-hydroxytryptamine (serotonin) receptor 7 (adenylate cyclase-coupled)
HTT	huntingtin
ICAM1	intercellular adhesion molecule 1
IFNG	interferon, gamma
IGF1	insulin-like growth factor 1 (somatomedin C)
IGF1R	insulin-like growth factor 1 receptor
IGF2	insulin-like growth factor 2 (somatomedin A)
IGFBP3	insulin-like growth factor binding protein 3
IL10	interleukin 10
IL10RA	interleukin 10 receptor, alpha
IL12A	interleukin 12A (natural killer cell stimulatory factor 1, cytotoxic lymphocyte maturation factor 1, p35)
IL12B	interleukin 12B (natural killer cell stimulatory factor 2, cytotoxic lymphocyte maturation factor 2, p40)
IL17RA	interleukin 17 receptor A
IL18	interleukin 18 (interferon-gamma-inducing factor)
IL18BP	interleukin 18 binding protein
IL18R1	interleukin 18 receptor 1
IL18RAP	interleukin 18 receptor accessory protein
IL1A	interleukin 1, alpha
IL1B	interleukin 1, beta
IL1RN	interleukin 1 receptor antagonist
IL2	interleukin 2
IL2RB	interleukin 2 receptor, beta
IL3	interleukin 3 (colony-stimulating factor, multiple)
IL3RA	interleukin 3 receptor, alpha (low affinity)
IL3RA	interleukin 3 receptor, alpha (low affinity)
IL4	interleukin 4
IL4R	interleukin 4 receptor
IL6	interleukin 6 (interferon, beta 2)
IL6R	interleukin 6 receptor
IL9	interleukin 9
IMPA2	inositol(myo)-1(or 4)-monophosphatase 2
INA	internexin neuronal intermediate filament protein, alpha
INPP1	inositol polyphosphate-1-phosphatase
INPP4A	inositol polyphosphate-4-phosphatase, type I, 107kDa
INPP4B	inositol polyphosphate-4-phosphatase, type II, 105kDa
INPP5A	inositol polyphosphate-5-phosphatase, 40kDa
INPP5D	inositol polyphosphate-5-phosphatase, 145kDa
INPP5J	inositol polyphosphate-5-phosphatase J
INPPL1	inositol polyphosphate phosphatase-like 1
INS	insulin
IPO5	importin 5
IRS1	insulin receptor substrate 1
ITGA3	integrin, alpha 3 (antigen CD49C, alpha 3 subunit of VLA-3 receptor)
JAG1	jagged 1
JAG2	jagged 2
JARID2	jumonji, AT rich interactive domain 2
KCNH1	potassium voltage-gated channel, subfamily H (eag-related), member 1
KCNH2	potassium voltage-gated channel, subfamily H (eag-related), member 2
KCNH5	potassium voltage-gated channel, subfamily H (eag-related), member 5
KCNJ10	potassium inwardly-rectifying channel, subfamily J, member 10
KCNN3	potassium intermediate/small conductance calcium-activated channel, subfamily N, member 3
KIAA1217	KIAA1217
KIF13A	kinesin family member 13A
KIF17	kinesin family member 17
KIF2A	kinesin heavy chain member 2A
KIF5A	kinesin family member 5A
KLF5	Kruppel-like factor 5 (intestinal)
KLF6	Kruppel-like factor 6
KLK8	kallikrein-related peptidase 8
KMO	kynurenine 3-monooxygenase (kynurenine 3-hydroxylase)
KPNA3	karyopherin alpha 3 (importin alpha 4)
KREMEN1	kringle containing transmembrane protein 1
L1CAM	L1 cell adhesion molecule
LGI1	leucine-rich, glioma inactivated 1
LHPP	phospholysine phosphohistidine inorganic pyrophosphate phosphatase
LIF	leukemia inhibitory factor (cholinergic differentiation factor)
LMOD1	leiomodin 1 (smooth muscle)
LMX1A	LIM homeobox transcription factor 1, alpha
LMX1B	LIM homeobox transcription factor 1, beta
LSAMP	limbic system-associated membrane protein
LSM2	LSM2 homolog, U6 small nuclear RNA associated (S. cerevisiae)
LST1	leukocyte specific transcript 1
LTA	lymphotoxin alpha (TNF superfamily, member 1)
LTB	lymphotoxin beta (TNF superfamily, member 3)
MAG	myelin associated glycoprotein
MAGI1	membrane associated guanylate kinase, WW and PDZ domain containing 1
MAGI2	membrane associated guanylate kinase, WW and PDZ domain containing 2
MAGI3	membrane associated guanylate kinase, WW and PDZ domain containing 3
MAL	mal, T-cell differentiation protein
MANBA	mannosidase, beta A, lysosomal
MAOA	monoamine oxidase A
MAOB	monoamine oxidase B
MAP1A	microtubule-associated protein 1A
MAP4	microtubule-associated protein 4
MAP6	microtubule-associated protein 6
MAPK14	mitogen-activated protein kinase 14
MAPK8IP2	mitogen-activated protein kinase 8 interacting protein 2
MAPT	microtubule-associated protein tau
MAT1A	methionine adenosyltransferase I, alpha
MBP	myelin basic protein
MC5R	melanocortin 5 receptor
MCHR1	melanin-concentrating hormone receptor 1
MCHR2	melanin-concentrating hormone receptor 2
MCTP2	multiple C2 domains, transmembrane 2
MDGA1	MAM domain containing glycosylphosphatidylinositol anchor 1
MDH1	malate dehydrogenase 1, NAD (soluble)
MED12	mediator complex subunit 12
MED15	mediator complex subunit 15
MEGF10	multiple EGF-like-domains 10
MET	met proto-oncogene (hepatocyte growth factor receptor)
MFRP	membrane frizzled-related protein
MICB	MHC class I polypeptide-related sequence B
MIF	macrophage migration inhibitory factor (glycosylation-inhibiting factor)
MITF	microphthalmia-associated transcription factor
MLC1	megalencephalic leukoencephalopathy with subcortical cysts 1
MLLT10	myeloid/lymphoid or mixed-lineage leukemia (trithorax homolog, Drosophila); translocated to, 10
MMP3	matrix metallopeptidase 3 (stromelysin 1, progelatinase)
MMP9	matrix metallopeptidase 9 (gelatinase B, 92kDa gelatinase, 92kDa type IV collagenase)
MOBP	myelin-associated oligodendrocyte basic protein
MOG	myelin oligodendrocyte glycoprotein
MOV10L1	Mov10l1, Moloney leukemia virus 10-like 1, homolog (mouse)
MPPED1	metallophosphoesterase domain containing 1
MPZ	myelin protein zero
MPZL1	myelin protein zero-like 1
MRPL38	mitochondrial ribosomal protein L38
MSRA	methionine sulfoxide reductase A
MSRB2	methionine sulfoxide reductase B2
MT-ATP8	ATP synthase F0 subunit 8
MT-CYB	cytochrome b
MTHFD1	methylenetetrahydrofolate dehydrogenase (NADP+ dependent) 1, methenyltetrahydrofolate cyclohydrolase, formyltetrahydrofolate synthetase
MTHFR	methylenetetrahydrofolate reductase (NAD(P)H)
MTR	5-methyltetrahydrofolate-homocysteine methyltransferase
MUTED	muted homolog (mouse)
MYB (includes EG:4602)	v-myb myeloblastosis viral oncogene homolog (avian)
MYH9	myosin, heavy chain 9, non-muscle
MYLIP	myosin regulatory light chain interacting protein
MYO18B	myosin XVIIIB
MYO9B	myosin IXB
MYOZ1	myozenin 1
MYT1	myelin transcription factor 1
NAD+
NADP
NAGS	N-acetylglutamate synthase
NALCN	sodium leak channel, non-selective
NAT1	N-acetyltransferase 1 (arylamine N-acetyltransferase)
NCAM1	neural cell adhesion molecule 1
NCOA7	nuclear receptor coactivator 7
NCR3	natural cytotoxicity triggering receptor 3
NCSTN	nicastrin
NDE1	nudE nuclear distribution gene E homolog 1 (A. nidulans)
NDEL1	nudE nuclear distribution gene E homolog (A. nidulans)-like 1
NDRG1	N-myc downstream regulated 1
NDUFV2	NADH dehydrogenase (ubiquinone) flavoprotein 2, 24kDa
NEFL	neurofilament, light polypeptide
NEFM	neurofilament, medium polypeptide
NEU4	sialidase 4
NEUROG1	neurogenin 1
NFIL3	nuclear factor, interleukin 3 regulated
NFKBIL1	nuclear factor of kappa light polypeptide gene enhancer in B-cells inhibitor-like 1
NGF	nerve growth factor (beta polypeptide)
NGFR	nerve growth factor receptor
NOS1	nitric oxide synthase 1 (neuronal)
NOS1AP	nitric oxide synthase 1 (neuronal) adaptor protein
NOS3	nitric oxide synthase 3 (endothelial cell)
NOTCH1	notch 1
NOTCH2	notch 2
NOTCH3	notch 3
NOTCH4	notch 4
NPAS2	neuronal PAS domain protein 2
NPAS3	neuronal PAS domain protein 3
NPSR1	neuropeptide S receptor 1
NPTN	neuroplastin
NPY	neuropeptide Y
NQO1	NAD(P)H dehydrogenase, quinone 1
NQO2	NAD(P)H dehydrogenase, quinone 2
NR1D1	nuclear receptor subfamily 1, group D, member 1
NR2E1 (includes EG:7101)	nuclear receptor subfamily 2, group E, member 1
NR3C1	nuclear receptor subfamily 3, group C, member 1 (glucocorticoid receptor)
NR3C2	nuclear receptor subfamily 3, group C, member 2
NR4A1	nuclear receptor subfamily 4, group A, member 1
NR4A2	nuclear receptor subfamily 4, group A, member 2
NR4A3	nuclear receptor subfamily 4, group A, member 3
NRG1	neuregulin 1
NRG2	neuregulin 2
NRG3	neuregulin 3
NRG4	neuregulin 4
NRGN	neurogranin (protein kinase C substrate, RC3)
NRN1	neuritin 1
NRXN1	neurexin 1
NRXN3	neurexin 3
NTF3	neurotrophin 3
NTNG1	netrin G1
NTNG2	netrin G2
NTRK2	neurotrophic tyrosine kinase, receptor, type 2
NTRK3	neurotrophic tyrosine kinase, receptor, type 3
NTS	neurotensin
NTSR1	neurotensin receptor 1 (high affinity)
NUMBL	numb homolog (Drosophila)-like
NUP153	nucleoporin 153kDa
OGG1	8-oxoguanine DNA glycosylase
OLIG2	oligodendrocyte lineage transcription factor 2
OMG	oligodendrocyte myelin glycoprotein
OPCML	opioid binding protein/cell adhesion molecule-like
OPRM1	opioid receptor, mu 1
OXT	oxytocin, prepropeptide
OXTR	oxytocin receptor
P2RX7	purinergic receptor P2X, ligand-gated ion channel, 7
PADI2	peptidyl arginine deiminase, type II
PADI4	peptidyl arginine deiminase, type IV
PAFAH1B1	platelet-activating factor acetylhydrolase 1b, regulatory subunit 1 (45kDa)
PAH	phenylalanine hydroxylase
PAICS	phosphoribosylaminoimidazole carboxylase, phosphoribosylaminoimidazole succinocarboxamide synthetase
PALB2	partner and localizer of BRCA2
PANX2	pannexin 2
PAWR	PRKC, apoptosis, WT1, regulator
PAX3	paired box 3
PAX6	paired box 6
PCDH11X	protocadherin 11 X-linked
PCDH11Y	protocadherin 11 Y-linked
PCDH8	protocadherin 8
PCDHGC3	protocadherin gamma subfamily C, 3
PCK1	phosphoenolpyruvate carboxykinase 1 (soluble)
PCK2	phosphoenolpyruvate carboxykinase 2 (mitochondrial)
PCM1	pericentriolar material 1
PCNT	pericentrin
PDE4B	phosphodiesterase 4B, cAMP-specific
PDE4D	phosphodiesterase 4D, cAMP-specific
PDE7B	phosphodiesterase 7B
PDGFB	platelet-derived growth factor beta polypeptide (simian sarcoma viral (v-sis) oncogene homolog)
PDGFRA	platelet-derived growth factor receptor, alpha polypeptide
PDGFRB	platelet-derived growth factor receptor, beta polypeptide
PDLIM2	PDZ and LIM domain 2 (mystique)
PDLIM5	PDZ and LIM domain 5
PDYN	prodynorphin
PEA15	phosphoprotein enriched in astrocytes 15
PEBP4	phosphatidylethanolamine-binding protein 4
PEMT	phosphatidylethanolamine N-methyltransferase
PENK	proenkephalin
PER1	period homolog 1 (Drosophila)
PER2	period homolog 2 (Drosophila)
PER3	period homolog 3 (Drosophila)
PGAM1	phosphoglycerate mutase 1 (brain)
PGBD1	piggyBac transposable element derived 1
PGD	phosphogluconate dehydrogenase
PHF21B	PHD finger protein 21B
PHGDH	phosphoglycerate dehydrogenase
PHOX2B	paired-like homeobox 2b
PI4K2B	phosphatidylinositol 4-kinase type 2 beta
PI4KA	phosphatidylinositol 4-kinase, catalytic, alpha
PI4KB	phosphatidylinositol 4-kinase, catalytic, beta
PICALM	phosphatidylinositol binding clathrin assembly protein
PICK1	protein interacting with PRKCA 1
PIK3C2A	phosphoinositide-3-kinase, class 2, alpha polypeptide
PIK3C2B	phosphoinositide-3-kinase, class 2, beta polypeptide
PIK3C2G	phosphoinositide-3-kinase, class 2, gamma polypeptide
PIK3C3	phosphoinositide-3-kinase, class 3
PIK3CB	phosphoinositide-3-kinase, catalytic, beta polypeptide
PIK3CD	phosphoinositide-3-kinase, catalytic, delta polypeptide
PIK3CG	phosphoinositide-3-kinase, catalytic, gamma polypeptide
PIK3R1	phosphoinositide-3-kinase, regulatory subunit 1 (alpha)
PIK3R2	phosphoinositide-3-kinase, regulatory subunit 2 (beta)
PIK3R3	phosphoinositide-3-kinase, regulatory subunit 3 (gamma)
PIK3R4	phosphoinositide-3-kinase, regulatory subunit 4
PIP4K2A	phosphatidylinositol-5-phosphate 4-kinase, type II, alpha
PIP4K2B	phosphatidylinositol-5-phosphate 4-kinase, type II, beta
PIP5K1A	phosphatidylinositol-4-phosphate 5-kinase, type I, alpha
PIP5K1B	phosphatidylinositol-4-phosphate 5-kinase, type I, beta
PIP5K1C	phosphatidylinositol-4-phosphate 5-kinase, type I, gamma
PITX3	paired-like homeodomain 3
PIWIL2	piwi-like 2 (Drosophila)
PLA2G4A	phospholipase A2, group IVA (cytosolic, calcium-dependent)
PLA2G4C	phospholipase A2, group IVC (cytosolic, calcium-independent)
PLA2G4D	phospholipase A2, group IVD (cytosolic)
PLA2G6	phospholipase A2, group VI (cytosolic, calcium-independent)
PLA2G7	phospholipase A2, group VII (platelet-activating factor acetylhydrolase, plasma)
PLAA	phospholipase A2-activating protein
PLCB1	phospholipase C, beta 1 (phosphoinositide-specific)
PLCB3	phospholipase C, beta 3 (phosphatidylinositol-specific)
PLCE1	phospholipase C, epsilon 1
PLCG1	phospholipase C, gamma 1
PLDN	pallidin homolog (mouse)
PLLP	plasmolipin
PLP1	proteolipid protein 1
PLUNC	palate, lung and nasal epithelium associated
PLXNA2	plexin A2
PMCH	pro-melanin-concentrating hormone
PMP22	peripheral myelin protein 22
PNOC	prepronociceptin
PNPLA8	patatin-like phospholipase domain containing 8
PNPO	pyridoxamine 5'-phosphate oxidase
POM121L2 (includes EG:94026)	POM121 membrane glycoprotein-like 2
PON1	paraoxonase 1
POU3F1	POU class 3 homeobox 1
PPAPDC1A	phosphatidic acid phosphatase type 2 domain containing 1A
PPARA	peroxisome proliferator-activated receptor alpha
PPARD	peroxisome proliferator-activated receptor delta
PPARG	peroxisome proliferator-activated receptor gamma
PPIL2	peptidylprolyl isomerase (cyclophilin)-like 2
PPM1F	protein phosphatase, Mg2+/Mn2+ dependent, 1F
PPP1R11	protein phosphatase 1, regulatory (inhibitor) subunit 11
PPP1R1B	protein phosphatase 1, regulatory (inhibitor) subunit 1B
PPP2R2B	protein phosphatase 2, regulatory subunit B, beta
PPP3CA	protein phosphatase 3, catalytic subunit, alpha isozyme
PPP3CB	protein phosphatase 3, catalytic subunit, beta isozyme
PPP3CC	protein phosphatase 3, catalytic subunit, gamma isozyme
PPP3R1	protein phosphatase 3, regulatory subunit B, alpha
PPP3R2	protein phosphatase 3, regulatory subunit B, beta
PRKCA	protein kinase C, alpha
PRKCG	protein kinase C, gamma
PRNP	prion protein
PRODH	proline dehydrogenase (oxidase) 1
PROZ	protein Z, vitamin K-dependent plasma glycoprotein
PRSS16	protease, serine, 16 (thymus)
PRX	periaxin
PSAP	prosaposin
PSEN1	presenilin 1
PSEN2	presenilin 2 (Alzheimer disease 4)
PTAR1	protein prenyltransferase alpha subunit repeat containing 1
PTEN	phosphatase and tensin homolog
PTGDS	prostaglandin D2 synthase 21kDa (brain)
PTGFRN	prostaglandin F2 receptor negative regulator
PTGS1	prostaglandin-endoperoxide synthase 1 (prostaglandin G/H synthase and cyclooxygenase)
PTGS2	prostaglandin-endoperoxide synthase 2 (prostaglandin G/H synthase and cyclooxygenase)
PTPRZ1	protein tyrosine phosphatase, receptor-type, Z polypeptide 1
QKI	quaking homolog, KH domain RNA binding (mouse)
RANBP1	RAN binding protein 1
RAPGEF6	Rap guanine nucleotide exchange factor (GEF) 6
RASL10A	RAS-like, family 10, member A
RBM24	RNA binding motif protein 24
RBM9	RNA binding motif protein 9
RBP1	retinol binding protein 1, cellular
RELA	v-rel reticuloendotheliosis viral oncogene homolog A (avian)
RELN	reelin
RET	ret proto-oncogene
RGS10	regulator of G-protein signaling 10
RGS4	regulator of G-protein signaling 4
RGS9	regulator of G-protein signaling 9
RHO	rhodopsin
RNF13	ring finger protein 13
RORB	RAR-related orphan receptor B
RPGRIP1L	RPGRIP1-like
RPP21	ribonuclease P/MRP 21kDa subunit
RSRC1	arginine/serine-rich coiled-coil 1
RTN4	reticulon 4
RTN4R	reticulon 4 receptor
RUNX1	runt-related transcription factor 1
RXRB	retinoid X receptor, beta
RYR3	ryanodine receptor 3
S100B	S100 calcium binding protein B
SAT1	spermidine/spermine N1-acetyltransferase 1
SCGB1A1	secretoglobin, family 1A, member 1 (uteroglobin)
SCRT2	scratch homolog 2, zinc finger protein (Drosophila)
SELENBP1	selenium binding protein 1
SEMA3A	sema domain, immunoglobulin domain (Ig), short basic domain, secreted, (semaphorin) 3A
SEMA3D	sema domain, immunoglobulin domain (Ig), short basic domain, secreted, (semaphorin) 3D
SEPSECS	Sep (O-phosphoserine) tRNA:Sec (selenocysteine) tRNA synthase
SERPINA1	serpin peptidase inhibitor, clade A (alpha-1 antiproteinase, antitrypsin), member 1
SERPINA3	serpin peptidase inhibitor, clade A (alpha-1 antiproteinase, antitrypsin), member 3
SEZ6L	seizure related 6 homolog (mouse)-like
SFRP1	secreted frizzled-related protein 1
SH2D1B	SH2 domain containing 1B
SHANK3	SH3 and multiple ankyrin repeat domains 3
SHISA5	shisa homolog 5 (Xenopus laevis)
SHMT1	serine hydroxymethyltransferase 1 (soluble)
SIGMAR1	sigma non-opioid intracellular receptor 1
SIL1	SIL1 homolog, endoplasmic reticulum chaperone (S. cerevisiae)
SIPA1L3 (includes EG:23094)	signal-induced proliferation-associated 1 like 3
SIRT1	sirtuin 1
SIRT5	sirtuin 5
SLC12A6	solute carrier family 12 (potassium/chloride transporters), member 6
SLC15A1	solute carrier family 15 (oligopeptide transporter), member 1
SLC17A6	solute carrier family 17 (sodium-dependent inorganic phosphate cotransporter), member 6
SLC17A7	solute carrier family 17 (sodium-dependent inorganic phosphate cotransporter), member 7
SLC18A1	solute carrier family 18 (vesicular monoamine), member 1
SLC18A2	solute carrier family 18 (vesicular monoamine), member 2
SLC1A1	solute carrier family 1 (neuronal/epithelial high affinity glutamate transporter, system Xag), member 1
SLC1A2	solute carrier family 1 (glial high affinity glutamate transporter), member 2
SLC1A3	solute carrier family 1 (glial high affinity glutamate transporter), member 3
SLC1A4	solute carrier family 1 (glutamate/neutral amino acid transporter), member 4
SLC1A5	solute carrier family 1 (neutral amino acid transporter), member 5
SLC1A6	solute carrier family 1 (high affinity aspartate/glutamate transporter), member 6
SLC22A4 (includes EG:6583)	solute carrier family 22 (organic cation/ergothioneine transporter), member 4
SLC24A5	solute carrier family 24, member 5
SLC25A1	solute carrier family 25 (mitochondrial carrier; citrate transporter), member 1
SLC25A12	solute carrier family 25 (mitochondrial carrier, Aralar), member 12
SLC25A14	solute carrier family 25 (mitochondrial carrier, brain), member 14
SLC25A27	solute carrier family 25, member 27
SLC35B3	solute carrier family 35, member B3
SLC39A14	solute carrier family 39 (zinc transporter), member 14
SLC44A4	solute carrier family 44, member 4
SLC6A2	solute carrier family 6 (neurotransmitter transporter, noradrenalin), member 2
SLC6A3	solute carrier family 6 (neurotransmitter transporter, dopamine), member 3
SLC6A4	solute carrier family 6 (neurotransmitter transporter, serotonin), member 4
SLC6A5	solute carrier family 6 (neurotransmitter transporter, glycine), member 5
SLC6A9	solute carrier family 6 (neurotransmitter transporter, glycine), member 9
SLIT3	slit homolog 3 (Drosophila)
SMARCA2	SWI/SNF related, matrix associated, actin dependent regulator of chromatin, subfamily a, member 2
SMARCC1	SWI/SNF related, matrix associated, actin dependent regulator of chromatin, subfamily c, member 1
SNAP25	synaptosomal-associated protein, 25kDa
SNAP29	synaptosomal-associated protein, 29kDa
SNAPIN	SNAP-associated protein
SNCG	synuclein, gamma (breast cancer-specific protein 1)
SOD2	superoxide dismutase 2, mitochondrial
SORBS3	sorbin and SH3 domain containing 3
SOX10	SRY (sex determining region Y)-box 10
SP4	Sp4 transcription factor
SPARCL1	SPARC-like 1 (hevin)
SPP1	secreted phosphoprotein 1
SPTAN1	spectrin, alpha, non-erythrocytic 1 (alpha-fodrin)
SRD5A1	steroid-5-alpha-reductase, alpha polypeptide 1 (3-oxo-5 alpha-steroid delta 4-dehydrogenase alpha 1)
SRD5A2	steroid-5-alpha-reductase, alpha polypeptide 2 (3-oxo-5 alpha-steroid delta 4-dehydrogenase alpha 2)
SREBF1	sterol regulatory element binding transcription factor 1
SREBF2	sterol regulatory element binding transcription factor 2
SRR	serine racemase
SST	somatostatin
ST13	suppression of tumorigenicity 13 (colon carcinoma) (Hsp70 interacting protein)
ST6GAL2	ST6 beta-galactosamide alpha-2,6-sialyltranferase 2
ST8SIA2	ST8 alpha-N-acetyl-neuraminide alpha-2,8-sialyltransferase 2
ST8SIA4	ST8 alpha-N-acetyl-neuraminide alpha-2,8-sialyltransferase 4
STK24	serine/threonine kinase 24
STK4	serine/threonine kinase 4
STX1A	syntaxin 1A (brain)
STX7	syntaxin 7
SULT4A1	sulfotransferase family 4A, member 1
SULT6B1	sulfotransferase family, cytosolic, 6B, member 1
SYN2	synapsin II
SYN3	synapsin III
SYNGAP1	synaptic Ras GTPase activating protein 1
SYNGR1	synaptogyrin 1
SYNJ1	synaptojanin 1
SYP	synaptophysin
SYT11	synaptotagmin XI
TAAR1	trace amine associated receptor 1
TAAR2	trace amine associated receptor 2
TAAR5	trace amine associated receptor 5
TAAR6	trace amine associated receptor 6
TACC2	transforming, acidic coiled-coil containing protein 2
TACR3	tachykinin receptor 3
TAP2	transporter 2, ATP-binding cassette, sub-family B (MDR/TAP)
TBP	TATA box binding protein
TBX1	T-box 1
TCERG1L	transcription elongation regulator 1-like
TCF4	transcription factor 4
TCP1	t-complex 1
TDO2	tryptophan 2,3-dioxygenase
TECR	trans-2,3-enoyl-CoA reductase
TEX264	testis expressed 264
TF	transferrin
TFAP2A	transcription factor AP-2 alpha (activating enhancer binding protein 2 alpha)
TFAP2B	transcription factor AP-2 beta (activating enhancer binding protein 2 beta)
TFRC	transferrin receptor (p90, CD71)
TGFBR2	transforming growth factor, beta receptor II (70/80kDa)
TGM2	transglutaminase 2 (C polypeptide, protein-glutamine-gamma-glutamyltransferase)
TH	tyrosine hydroxylase
TIMELESS	timeless homolog (Drosophila)
TIMM17A (includes EG:10440)	translocase of inner mitochondrial membrane 17 homolog A (yeast)
TIMP3	TIMP metallopeptidase inhibitor 3
TMEM108	transmembrane protein 108
TNF	tumor necrosis factor
TNFRSF1B	tumor necrosis factor receptor superfamily, member 1B
TNXB	tenascin XB
TP53	tumor protein p53
TPH1	tryptophan hydroxylase 1
TPH2	tryptophan hydroxylase 2
TPP2	tripeptidyl peptidase II
TRAF3IP1	TNF receptor-associated factor 3 interacting protein 1
TREM2	triggering receptor expressed on myeloid cells 2
TRMT2A	TRM2 tRNA methyltransferase 2 homolog A (S. cerevisiae)
TSC2	tuberous sclerosis 2
TSKU	tsukushi small leucine rich proteoglycan homolog (Xenopus laevis)
TSNAX	translin-associated factor X
TSPAN8	tetraspanin 8
TSPO	translocator protein (18kDa)
TTC13	tetratricopeptide repeat domain 13
TTR	transthyretin
TUBA1A	tubulin, alpha 1a
TUBA8	tubulin, alpha 8
TXNDC5	thioredoxin domain containing 5 (endoplasmic reticulum)
TXNRD2	thioredoxin reductase 2
TYR	tyrosinase (oculocutaneous albinism IA)
TYROBP	TYRO protein tyrosine kinase binding protein
TYRP1	tyrosinase-related protein 1
UBE2L3	ubiquitin-conjugating enzyme E2L 3
UCP2	uncoupling protein 2 (mitochondrial, proton carrier)
UFD1L	ubiquitin fusion degradation 1 like (yeast)
UGT1A1	UDP glucuronosyltransferase 1 family, polypeptide A1
UGT8	UDP glycosyltransferase 8
UHMK1	U2AF homology motif (UHM) kinase 1
UHRF1	ubiquitin-like with PHD and ring finger domains 1
UNC5C	unc-5 homolog C (C. elegans)
USP46	ubiquitin specific peptidase 46
VAMP2	vesicle-associated membrane protein 2 (synaptobrevin 2)
VDR	vitamin D (1,25- dihydroxyvitamin D3) receptor
VGF	VGF nerve growth factor inducible
VIPR1	vasoactive intestinal peptide receptor 1
VIPR2	vasoactive intestinal peptide receptor 2
VLDLR	very low density lipoprotein receptor
WFS1	Wolfram syndrome 1 (wolframin)
WNT2	wingless-type MMTV integration site family member 2
WNT2B	wingless-type MMTV integration site family, member 2B
WNT5A	wingless-type MMTV integration site family, member 5A
WNT7B	wingless-type MMTV integration site family, member 7B
WNT8A	wingless-type MMTV integration site family, member 8A
WWC1	WW and C2 domain containing 1
XBP1	X-box binding protein 1
XRCC1	X-ray repair complementing defective repair in Chinese hamster cells 1
YWHAB	tyrosine 3-monooxygenase/tryptophan 5-monooxygenase activation protein, beta polypeptide
YWHAE	tyrosine 3-monooxygenase/tryptophan 5-monooxygenase activation protein, epsilon polypeptide
YWHAG	tyrosine 3-monooxygenase/tryptophan 5-monooxygenase activation protein, gamma polypeptide
YWHAH	tyrosine 3-monooxygenase/tryptophan 5-monooxygenase activation protein, eta polypeptide
YWHAZ	tyrosine 3-monooxygenase/tryptophan 5-monooxygenase activation protein, zeta polypeptide
ZBED4	zinc finger, BED-type containing 4
ZBTB20	zinc finger and BTB domain containing 20
ZBTB9	zinc finger and BTB domain containing 9
ZCCHC4	zinc finger, CCHC domain containing 4
ZDHHC8	zinc finger, DHHC-type containing 8
ZIC2	Zic family member 2 (odd-paired homolog, Drosophila)
ZNF181	zinc finger protein 181
ZNF365	zinc finger protein 365
ZNF471	zinc finger protein 471
ZNF490	zinc finger protein 490
ZNF74	zinc finger protein 74
ZNF804A	zinc finger protein 804A
ZNF831	zinc finger protein 831

## Sheet: CarpeDB Database
Supplementary Table S1c. CarpeDB Database gene list of all genes implicated in Epilepsy (accessed 2/16/11)
HUGO Gene	Description	Chromosome
ABAT	4-aminobutyrate aminotransferase	16
ABCB1	ATP-binding cassette, sub-family B (MDR/TAP), member 1	7
ABCB10	ATP-binding cassette, sub-family B (MDR/TAP), member 10	1
ABCC1	ATP-binding cassette, sub-family C (CFTR/MRP), member 1	16
ADAM22	A disintegrin and metalloproteinase domain 22	7
ADNP	neuroprotective factor	20
ADSL	adenylosuccinate lyase	22
AGTR2	angiotensin II receptor, type 2	X
ALDH5A1	aldehyde dehydrogenase 5 family, member A1 (succinate-semialdehyde dehydrogenase)	6
ALDH7A1	Epilepsy, pyridoxine-dependent	5
ALG6	asparagine-linked glycosylation 6 homolog (yeast, alpha-1,3-glucosyltransferase)	1
ALG9/FDXACB1	asparagine-linked glycosylation 9 homolog	11
APOE	apolipoprotein E	19
AQP4	aquaporin 4	18
ARHGEF9	Cdc42 guanine nucleotide exchange factor (GEF) 9	X
ARX	aristaless related homeobox	X
ATP10A	ATPase, Class V, type 10A	15
ATP1A2	ATPase, Na+/K+ transporting, alpha 2 (+) polypeptide	1
ATP6AP2	mental retardation, X-linked, with epilepsy	X
BDNF	brain-derived neurotrophic factor	11
BRD2	bromodomain containing 2	6
C14orf160	chromosome 14 open reading frame 160	14
C6orf33	chromosome 6 open reading frame 33	6
CABC1	chaperone-ABC1 (activity of bc1 complex, S.pombe)-like	1
CACNA1A	calcium channel, voltage-dependent, P/Q type, alpha 1A subunit	19
CACNA1G	calcium channel, voltage-dependent, alpha 1G subunit	17
CACNA1H	calcium channel, voltage-dependent, alpha 1H subunit	16
CACNB4	calcium channel, voltage-dependent, beta 4 subunit	2
CACNG2	calcium channel, voltage-dependent, gamma subunit 2	22
CACNG3	calcium channel, voltage-dependent, gamma subunit 3	16
CASQ2	calsequestrin 2 (cardiac muscle)	1
CASR	calcium-sensing receptor	3
CCM1	cerebral cavernous malformations 1	7
CCM2	cerebral cavernous malformation 2	7
CDK5	cyclin-dependent kinase 5	7
CDKL5	cyclin-dependent kinase-like 5	X
CHGA	parathyroid secretory protein 1	14
CHRNA2	cholinergic receptor, nicotinic, alpha polypeptide 2	8
CHRNA4	cholinergic receptor, nicotinic, alpha polypeptide 4	20
CHRNA6	cholinergic receptor, nicotinic, alpha polypeptide 6	8
CHRNA7	cholinergic receptor, nicotinic, alpha polypeptide 7	15
CHRNB2	cholinergic receptor, nicotinic, beta polypeptide 2	1
CLCN2	chloride channel 2	3
CLN2	ceroid-lipofuscinosis, neuronal 2, late infantile (Jansky-Bielschowsky disease)	11
CLN3	ceroid-lipofuscinosis, neuronal 3, juvenile (Batten, Spielmeyer-Vogt disease)	16
CLN5	ceroid-lipofuscinosis, neuronal 5	13
CLN6	ceroid-lipofuscinosis, neuronal 6, late infantile, variant	15
CLN8	ceroid-lipofuscinosis, neuronal 8 (epilepsy, progressive with mental retardation)	8
CNR1	Cannabinoid receptor 1	6
CNTNAP2	Autism, susceptibility to, 15	7
COL18A1	collagen, type XVIII, alpha 1	21
CSEN	calsenilin, presenilin binding protein, EF hand transcription factor	2
CSMD3	CUB and Sushi multiple domains 3	8
CSNK1G2	casein kinase 1, gamma 2	19
CSTB	cystatin B	21
DAPK1	death-associated protein kinase 1	9
DCX	doublecortex; lissencephaly, X-linked (doublecortin)	X
DGKD	diacylglycerol kinase, delta 130kDa	2
DPAGT1	dolichyl-phosphate N-acetylglucosaminephosphotransferase 1	11
DPYSL2	dihydropyrimidinase-like 2	8
DRPLA	dentatorubral-pallidoluysian atrophy	12
EFHC1	EF-hand domain (C-terminal) containing 1	6
EIF2S1	eukaryotic translation initiation factor 2, subunit 1 alpha	14
ELP4	elongation protein 4 homolog (S. cerevisiae)	11
EMX2	empty spiracles homolog 2	10
EN2	Autism, susceptibility to, 10	7
ENFL2	epilepsy, nocturnal frontal lobe, type 2	15
EPM2A	epilepsy, progressive myoclonus type 2A	6
FCMTE1	myoclonic epilepsy, benign adult familial	8
FLNA	filamin A, alpha (actin binding protein 280)	X
FMR1	fragile X mental retardation 1	X
FMR2	fragile X mental retardation 2	X
FOSB	FBJ murine osteosarcoma viral oncogene homolog B	19
GABBr1	gamma-aminobutyric acid (GABA) B receptor 1	6
GABRA1	gamma-aminobutyric acid (GABA) A receptor, alpha 1	5
GABRB3	gamma-aminobutyric acid (GABA) A receptor, beta 3	15
GABRD	gamma-aminobutyric acid (GABA) A receptor, delta	1
GABRG2	gamma-aminobutyric acid (GABA) A receptor, gamma 2	5
GAD1	glutamate decarboxylase 1	2
GAL	galanin	11
GLUD1	glutamate dehydrogenase 1	10
GPR54	Hypogonadotropic hypogonadism	19
GRIN1	glutamate receptor, ionotropic, N-methyl D-aspartate 1	9
GRIN2A	glutamate receptor, ionotropic, N-methyl D-aspartate 2A	16
GRM1	glutamate receptor, metabotropic 1	6
HAX1	HS1 binding protein	1
HCN1	hyperpolarization activated cyclic nucleotide-gated potassium channel 1	5
HCN2	hyperpolarization activated cyclic nucleotide-gated potassium channel 2	19
HD	huntingtin (Huntington disease)	4
HSPB2	heat shock 27kDa protein 2	11
HTR2C	febrile convulsions 1	8
IDS	iduronate 2-sulfatase (Hunter syndrome)	X
IFNA1	interferon, alpha 1	9
IL1B	interleukin 1, beta	2
IL6	interleukin 6 (interferon, beta 2)	7
JRK	jerky homolog	8
KCNA1	potassium voltage-gated channel, shaker-related subfamily, member 1 (episodic ataxia)	12
KCNA10	potassium voltage-gated channel, shaker-related subfamily, member 10	1
KCNA4	potassium voltage-gated channel, shaker-related subfamily, member 4	11
KCNAB1	potassium voltage-gated channel, shaker-related subfamily, beta member 1	2
KCNAB2	potassium voltage-gated channel, shaker-related subfamily, beta member 2	1
KCNH2	potassium voltage-gated channel, subfamily H (eag-related), member 2	7
KCNJ10	potassium inwardly-rectifying channel, subfamily J, member 10	1
KCNJ11	potassium inwardly-rectifying channel, subfamily J, member 11	11
KCNN2	potassium intermediate/small conductance calcium-activated channel, subfamily N, member 2	5
KCNQ1	potassium voltage-gated channel, KQT-like subfamily, member 1	11
KCNQ2	potassium voltage-gated channel, KQT-like subfamily, member 2	20
KCNQ3	potassium voltage-gated channel, KQT-like subfamily, member 3	8
KCNV1	potassium channel, subfamily V, member 1	8
L2HGDH	protein coding	14
LGI1	leucine-rich, glioma inactivated 1	10
LGI2	leucine-rich repeat LGI family, member 2	4
LGI3	leucine-rich repeat LGI family, member 3	8
LGI4	leucine-rich repeat LGI family, member 4	19
MASS1	monogenic, audiogenic seizure susceptibility 1 homolog	5
MC3R	melanocortin 3 receptor	20
ME2	malic enzyme 2, NAD(+)-dependent, mitochondrial	18
MED31	febrile convulsions 3	2
MLLT3	myeloid/lymphoid or mixed-lineage leukemia (trithorax homolog, Drosophila); translocated to, 3	9
NDUFV1	NADH dehydrogenase (ubiquinone) flavoprotein 1, 51kDa	11
NEDD4	neural precursor cell expressed, developmentally down-regulated 4	15
NEU1	sialidase 1 (lysosomal sialidase)	6
NF1	neurofibromin 1 (neurofibromatosis, von Recklinghausen disease, Watson disease)	17
NHLRC1	NHL repeat containing 1	6
NPY	neuropeptide Y	7
NRXN1	Autism, susceptibility to, 15	2
OPHN1	oligophrenin 1	X
OPRM1	opioid receptor, mu 1	6
PAFAH1B1	platelet-activating factor acetylhydrolase, isoform Ib, alpha subunit 45kDa	17
PCDH19	epilepsy, female restricted, with mental retardation (Juberg-Hellman syndrome)	X
PCMT1	protein-L-isoaspartate (D-aspartate) O-methyltransferase	6
PDYN	Beta-neoendorphin-dynorphin precursor	20
PHF6	PHD finger protein 6	X
PHOX2A	paired-like (aristaless) homeobox 2a	11
PLAT	plasminogen activator, tissue	8
PLD1	phospholipase D1, phophatidylcholine-specific	3
POLG	polymerase (DNA directed), gamma	15
PPT1	palmitoyl-protein thioesterase 1 (ceroid-lipofuscinosis, neuronal 1, infantile)	1
PRICKLE1	Epilepsy, progressive myoclonic 1B	12
PRKCG	protein kinase C, gamma	19
PRNP	prion protein (p27-30) (CJD, GSS syndrome, fatal familial insomnia)	20
PRODH	Proline dehydrogenase (proline oxidase )	22
PSEN1	presenilin 1 (Alzheimer disease 3)	14
PTGS2	prostaglandin-endoperoxide synthase 2	1
QPRT	quinolinate phosphoribosyltransferase	16
RELN	reelin	7
S100B	S100 calcium binding protein, beta	21
SCA10	spinocerebellar ataxia 10	22
SCA2	spinocerebellar ataxia 2	12
SCARB2	Scavenger receptor class B member 2	IV
SCN1A	sodium channel, voltage-gated, type I, alpha	2
SCN1B	sodium channel, voltage-gated, type I, beta	19
SCN2A1	sodium channel, voltage-gated, type II, alpha 1	2
SCN5A	sodium channel, voltage-gated, type V, alpha (long QT syndrome 3)	3
SEZ6	seizure related 6 homolog	17
SGCE	sarcoglycan, epsilon	7
SLC12A6	solute carrier family 12 (potassium/chloride transporters), member 6	15
SLC1A1	solute carrier family 1 (neuronal/epithelial high affinity glutamate transporter), member 1	9
SLC1A3	solute carrier family 1 (glial high affinity glutamate transporter), member 3	5
SLC25A22	solute carrier family 25 (mitochondrial carrier: glutamate), member 22	11
SLC2A1	solute carrier family 2 (facilitated glucose transporter), member 1	1
SLC4A3	solute carrier family 4, anion exchanger, member 3	2
SLC5A11	sodium/myo-inositol cotransporter 2	16
SLC6A12	solute carrier family 6 (neurotransmitter transporter, betaine/GABA), member 12	12
SLC6A8	solute carrier family 6 (neurotransmitter transporter, creatine), member 8	X
SLC9A6	Solute carrier family 9 (sodium/hydrogen exchanger), member 6	X
SMS	spermine synthase	X
STXBP1	syntaxin binding protein 1	9
SURF1	surfeit 1	9
SYN1	synapsin I	X
SYN2	protein coding	3
SYT10	synaptotagmin X	12
TBP	TATA box binding protein	6
TCF4	transcription factor 4	18
TMEM1	transmembrane protein 1	21
TRPV1	ransient receptor potential cation channel, subfamily V, member 1	17
TSC1	tuberous sclerosis 1	9
TSC2	tuberous sclerosis 2	16
TUBA1A	tubulin, alpha 1a	12
U2AF1	U2(RNU2) small nuclear RNA auxillary factor 1	21
UBE3A	ubiquitin protein ligase E3A (HPV E6-associated protein, Angelman syndrome)	15
UCP2	uncoupling protein 2, mitochondrial	11
WNT8B	wingless-type MMTV integration site family, member 8B	10
ZFHX1B	zinc finger homeobox 1b	2
ZNF354A	zinc finger protein 354A	5
