# Supplementary material for: Expression Profiling of Autism Candidate Genes during Human Brain Development Implicates Central Immune Signaling Pathways
Source: PLoS One. 2011 Sep 15;6(9):e24691. doi: 10.1371/journal.pone.0024691 (PMC3174192; doi:10.1371/journal.pone.0024691)
Supplement: Table S2 — Expression heat map of AutDB genes. (XLSX) [file pone.0024691.s011.xlsx]

## Sheet: "Heatmap"
Supplementary Table S2a. ASD gene expression "heatmap" of all genes in AutDB
	Dorsolateral Prefrontal Cortex										Ventrolateral Prefrontal Cortex										Medial Prefrontal Cortex										Orbitofrontal Cortex										Posterior Superior Temporal Cortex
	21wg	24wg	4mo	6mo	4yr	11yr	15yr	23yr			21wg	24wg	4mo	6mo	4yr	11yr	15yr	23yr			21wg	24wg	4mo	6mo	4yr	11yr	15yr	23yr			21wg	24wg	4mo	6mo	4yr	11yr	15yr	23yr			21wg	24wg	4mo	6mo	4yr	11yr	15yr	23yr
FABP7	768.631	501.437	109.457	186.958	74.057	40.8956	30.9531	84.1628		FABP7	546.417	448.412	106.805	191.91	100.54	36.9145	45.4781	48.6811		GNAS	170.258	251.678	203.763	52.5154	112.193	143.062	148.47	178.517		GNAS	174.605	270.911	148.26	33.7042	102.175	110.276	165.843	160.904		FABP7	1067.47	827.161	145.02	169.919	144.848	81.3634	33.9417	35.4204
MEF2C	171.963	267.865	162.698	4.82204	5.02882	73.3029	112.509	31.73		MAP2	99.9782	45.5837	192.423	4.35603	5.61481	74.9497	176.88	51.5358		MAP2	61.6825	85.3587	52.8584	4.97548	21.0487	80.0605	165.461	77.6821		FABP7	932.008	623.448	61.0023	164.983	86.3117	36.9346	40.4455	39.9119		GPX1	46.8927	155.924	38.9264	56.2894	191.858	116.533	48.373	56.2882
MAP2	63.1754	86.3204	175.588	3.46169	3.56332	82.5126	164.434	71.6167		GPX1	18.261	137.036	31.5737	76.3144	69.4785	102.368	52.227	59.2597		GPX1	21.6264	104.663	49.1252	55.6954	205.257	49.8352	42.4151	56.9675		MAP2	90.1058	29.3565	73.4003	2.81505	1.99017	63.6365	166.419	67.8886		MAP2	59.5741	14.2601	130.211	4.5476	2.26514	59.5003	140.976	47.8224
GPX1	25.7603	118.122	41.6915	71.2556	181.384	84.7673	45.0796	44.194		APC	48.9785	24.3217	142.322	9.73356	7.83378	23.0712	56.905	22.7227		MEF2C	128.848	216.023	65.2427	6.6792	18.4376	46.4061	69.8423	46.5281		GPX1	26.8265	130.599	66.7484	60.8584	251.232	66.0508	47.2329	50.2705		APC	21.5312	13.1508	164.276	4.94829	3.74531	19.1996	49.4529	30.2129
GNAS	159.286	252.743	208.306	35.3449	77.2107	124.933	181.109	162.483		MEF2C	239.85	158.605	191.22	7.6271	6.33252	58.3713	93.4269	36.1586		FABP7	686.184	356.16	129.598	191.707	117.418	58.7937	68.7847	44.1545		MEF2C	217.875	123.063	78.834	4.00772	4.12303	53.4629	106.756	39.4939		MEF2C	310.061	78.6858	127.811	4.31031	3.67519	36.2251	96.0986	29.3264
PDZD4	203.206	169.879	321.056	12.6773	65.1429	161.85	238.858	192.517		PRKCB	24.5873	11.8149	88.4229	7.21972	21.5445	59.6804	105.557	42.0745		PDZD4	121.998	182.697	213.03	12.3618	100.016	144.319	148.655	151.26		PDZD4	153.969	133.312	244.61	8.71982	117.809	138.051	220.363	159.728		GNAS	297.779	286.81	186.424	36.1834	76.197	65.0129	162.138	159.263
TSPAN7	44.165	88.2341	164.036	17.2682	27.1202	190.628	189.04	158.182		GNAS	137.799	289.662	192.336	80.0852	83.175	113.244	174.188	185.13		TSPAN7	59.5428	96.5092	155.943	34.4799	54.1626	175.053	175.891	219.694		TSPAN7	54.4339	82.9883	144.476	20.2096	60.8054	165.616	185.206	191.648		PDZD4	287.967	155.34	213.613	8.43084	88.8288	184.918	131.446	134.323
RPL10	66.8165	302.496	20.4269	41.3247	85.4097	41.5991	12.9326	18.5288		PDZD4	114.167	167.018	276.062	36.5706	85.9808	189.041	199.804	148.828		RPL10	89.3403	287.556	40.0337	27.2412	94.9258	36.1109	17.5658	23.3487		RPL10	91.1535	371.55	20.7594	42.1073	75.6242	46.9965	8.61575	24.4949		RPL10	162.129	424.579	33.9717	34.3972	92.7555	58.5983	22.616	22.7528
										RPL10	55.6717	335.815	16.0553	37.7838	33.6997	40.6512	15.0324	23.1832																						TSPAN7	78.8918	68.971	154.828	25.5269	41.3762	114.901	232.772	195.814
SEZ6L2	38.989	80.0677	81.7968	2.0257	17.2516	82.8356	72.4499	28.4765		TSPAN7	47.1927	98.7941	164.792	54.0993	65.7009	178.171	195.192	203.227		RAPGEF4	1.77477	1.8962	32.616	9.09406	11.2063	39.3242	89.7483	37.1589		HSD11B1L	10.049	24.4934	41.6335	11.1752	82.1832	26.0436	31.9042	25.9655
APC	31.2281	32.6477	97.1129	4.32882	1.86666	22.3265	53.2858	40.255												HRAS	42.0178	63.5954	52.5434	21.6202	83.4509	60.3138	47.4987	46.6877		RAPGEF4	1.35398	1.33247	29.6126	4.68975	7.81121	40.2653	82.3498	47.9899		RAPGEF4	1.68095	1.03305	58.0041	4.71216	17.1157	63.3131	80.6869	46.191
DCX	58.2969	83.6241	8.42245	0.13963	0.030831	0.537564	1.73285	0.669707		SEZ6L2	27.0037	96.8562	79.1652	6.1396	10.8991	75.9117	53.0922	45.2977		SEZ6L2	27.9821	81.6663	60.0157	2.16487	26.8541	49.5816	34.3807	47.6963		HRAS	45.3624	71.4614	44.3887	16.2598	85.5871	56.5851	51.5211	49.8091		HRAS	97.3735	76.2188	48.7304	18.3124	76.8157	73.1712	45.2438	43.9641
PRKCB	10.4249	11.4824	79.0583	4.11833	9.4702	68.9374	97.7979	24.8986		DCX	85.1906	28.7262	6.91723	0.033624	0	0.593508	0.951395	0.475592												SEZ6L2	30.8715	78.5911	82.9893	1.2816	31.8279	54.6129	67.2132	40.1717		PRKCB	13.8959	7.12337	61.2868	5.47189	16.9278	52.2919	91.8742	30.3813
																				HNRNPH2	65.434	55.5463	60.3226	5.67409	10.4742	51.9432	47.3681	65.7269		PRKCB	10.856	7.80091	48.0542	2.512	15.7783	55.39	92.7334	37.2054
HRAS	48.8474	67.4486	54.9402	21.847	75.6027	68.6465	55.7741	65.4779		RAPGEF4	1.85179	1.5087	45.2638	9.9864	19.1636	37.7181	76.9942	32.0022		PRKCB	17.2034	12.4789	42.1672	2.8842	20.5603	58.8743	79.3384	49.5381		DCX	81.2738	15.1611	3.72589	0.083624	0	0.350273	0.967518	0.624593		SEZ6L2	71.0926	75.2494	40.403	3.14858	9.99596	32.3018	45.3405	39.9683
RAPGEF4	0.893705	1.02169	40.1356	2.31868	5.14502	32.8132	73.1706	73.0506		HRAS	31.5875	76.9219	47.8989	37.5437	67.1727	64.3564	48.8522	49.5434		HSD11B1L	9.0527	25.113	28.4579	14.1366	66.7209	25.9057	28.297	22.6042												HNRNPH2	50.2753	41.768	71.4167	2.79788	7.49629	35.6247	57.4627	50.9021
RIMS3	9.78698	6.58171	17.9738	0.390044	1.57346	31.8251	62.7347	29.8267		GABRB3	31.1077	21.3666	60.0161	1.25623	2.60667	19.1764	61.2757	16.568		DCX	32.1732	65.8475	2.01555	0.317683	0.136708	0.179448	0.976742	0.99534		ROBO1	60.4692	24.6032	5.76819	0.268639	0.316929	2.74615	4.69777	5.59004
HNRNPH2	39.9244	58.1219	63.9574	1.43613	8.13526	52.5577	57.0548	38.9447		HNRNPH2	56.677	58.5855	69.1661	5.43775	22.0919	50.2258	50.7133	64.8434												APC	43.9538	19.1953	58.2883	4.01353	1.88277	25.4143	61.7857	29.4802		HSD11B1L	19.6423	32.4623	19.5325	9.59531	50.3641	43.0215	25.8429	21.6822
																				ROBO1	40.809	45.429	5.83999	0.688223	0.468286	2.93034	5.17814	5.18098		HNRNPH2	60.0234	51.3012	29.9648	2.32442	6.49799	52.2982	54.1228	59.8475		NRXN1	40.3772	7.95426	21.8401	0.908417	0.472963	6.01105	22.0989	14.5647
HSD11B1L	15.3954	22.9104	30.9892	14.5673	52.9091	35.1097	35.0168	35.2996		RIMS3	7.50159	2.92314	21.7533	0.972563	1.70964	26.5986	58.7192	25.0917		PCDH10	21.1128	42.7714	18.6664	2.32772	6.69314	19.964	30.2942	26.755												FEZF2	29.0443	45.2387	16.2228	0.982893	2.92711	4.30978	8.86937	9.32853
ROBO1	42.4739	39.9064	11.8182	0.233608	0.052666	1.90213	5.23164	5.24521		NRXN1	34.6126	20.7845	40.9958	1.07615	1.3832	9.61482	26.4381	13.1131		APC	43.7028	34.3189	52.6151	8.34188	7.53919	31.8587	59.646	30.8687		RIMS3	7.28827	2.59579	14.7648	0.06047	2.22067	19.6481	46.745	31.2481		ROBO1	43.6198	11.6429	6.39049	0.300857	0.112593	1.30026	3.87178	5.41408
PCDH10	37.7541	48.0946	37.2962	1.20121	2.7223	25.0347	39.4809	23.8486		ROBO1	42.7471	30.4654	12.1763	1.01754	0.486913	1.89654	5.23597	4.2775		CNR1	24.3321	46.2114	9.83085	0.71215	2.28787	7.57418	18.7918	9.64302		PCDH10	40.6653	37.0847	30.4532	0.929161	5.90278	24.7568	36.1427	27.2204		GLO1	6.87268	20.9918	36.6134	13.4722	21.1688	52.7664	56.2634	22.3534
CNR1	39.5454	43.0473	23.5457	0.311366	0.385653	10.6951	22.3633	9.20302		PCDH10	33.5912	46.3546	37.9075	3.67558	4.0958	23.1699	35.0989	23.1431		GLO1	20.3338	25.5448	27.3285	13.8784	17.7303	31.4492	49.274	26.3756		CNR1	58.4491	20.2214	22.5488	0.238124	0.299174	9.45045	23.1369	10.9301		HLA-A	15.8997	42.9971	43.477	27.043	39.3145	49.6938	26.8641	28.7234
GLO1	13.5398	32.6475	26.7794	9.95857	11.015	39.6529	41.2788	22.9123		CNR1	42.5465	25.5675	30.0494	0.131208	0.920817	9.21342	24.0531	7.59655		HLA-A	7.95286	39.0114	47.3287	35.0981	52.719	31.8882	29.2697	30.8095		GLO1	15.6857	26.613	26.7316	10.0933	24.4859	36.1595	41.4867	24.2681		NRCAM	11.9933	4.50879	24.3299	0.93671	1.07545	8.77888	40.6935	23.6427
HLA-A	7.58894	40.8625	40.7526	28.5089	36.7463	42.4913	29.0021	31.287		GLO1	17.0626	26.0228	35.5345	20.0749	20.696	42.3812	50.2284	23.0103		AUTS2	20.9931	43.2249	3.67881	0.806939	0.590878	3.06561	3.20004	4.3894		HLA-A	10.8138	39.3899	48.6128	23.2733	46.5763	37.633	29.9826	29.9296		PCDH9	9.61557	3.50366	17.1749	1.83391	2.73267	12.7393	42.5578	33.7592
AUTS2	46.83	41.3867	7.78008	0.35276	0.204189	3.11696	4.6517	5.68929		HLA-A	5.87144	47.8668	38.7042	48.9312	27.0661	44.529	26.4031	32.6213		DHCR7	18.2801	47.4719	9.23751	5.6026	10.4596	16.6796	14.3217	24.9635		NRCAM	21.3967	10.5461	14.4253	0.656936	1.04921	14.0176	51.7089	26.5071		VASH1	46.4748	10.1936	8.73302	0.532801	1.52635	1.91795	4.0726	6.13477
NRCAM	14.3421	16.1151	32.5057	0.510382	0.951828	17.4256	50.1862	22.6499		NRCAM	23.4121	13.3829	44.7714	1.62952	2.48198	13.932	50.0547	23.962		PCDH9	4.25089	3.6916	11.4914	2.4528	7.1387	22.3193	41.2265	32.4295		DHCR7	17.2142	45.94	16.6451	2.94749	12.0576	20.8837	15.2748	25.3715		ARNT2	20.854	5.59301	22.1141	0.99287	1.89243	23.0614	41.1838	29.8194
DHCR7	20.7597	47.7788	12.09	4.38174	6.60365	16.511	18.6061	21.2889		DHCR7	20.3217	51.3817	9.80234	10.8586	4.13674	18.3858	13.7345	24.9216		GABRB3	21.0505	31.7961	20.4026	0.665719	7.04729	18.4432	40.8212	22.3642		PCDH9	4.8098	3.57636	16.6975	1.90684	3.04725	31.2053	45.4605	34.8333		GABRB3	31.3604	7.16691	30.4393	0.80394	1.83561	16.3853	54.0591	12.4578
PCDH9	3.94532	5.61688	30.1478	2.33649	2.107	27.4902	47.0212	21.1026		PCDH9	6.21078	4.92943	34.8175	2.5058	4.14902	21.8226	48.6245	25.8306		NLGN3	22.2043	49.2988	21.8323	6.82578	7.61557	14.5192	22.6011	28.5895		ARNT2	19.4095	8.8725	23.2007	0.584584	1.94589	25.4479	43.1501	38.2292		MBD3	43.2523	29.3994	26.3502	4.4962	21.044	26.1013	19.4301	29.9257
ARNT2	14.2456	18.5557	32.6768	0.572974	0.995369	31.9409	46.7351	31.8591		ARNT2	16.9214	12.3929	29.3645	2.59954	3.25248	28.7574	44.7784	32.5753												GABRB3	24.9987	14.1504	28.3061	0.693985	2.20381	20.1736	59.5635	17.9161		CBS	45.6097	22.1328	7.13981	1.3842	1.44299	3.65545	4.74792	10.3323
GABRB3	22.7102	32.334	47.3157	0.947048	2.01059	25.1219	56.2261	13.4012		A2BP1	19.0145	21.0829	33.3255	0.581997	1.87279	17.7556	43.6442	15.5795		DAB1	12.7742	23.4406	3.40077	0.603247	0.466539	2.32936	3.16441	1.34991		MBD3	23.9968	24.4294	47.8018	5.51684	40.9063	18.4498	34.0923	34.628		DCX	52.6957	7.1763	4.75121	0.369807	0	0.4368	1.10201	0.335784
A2BP1	20.3642	21.9761	30.323	0.457105	1.55027	18.3012	48.7649	13.3014		NLGN3	20.8816	46.0667	33.2646	8.87091	3.86896	13.8488	24.0731	27.0098		RIMS3	4.20119	6.30638	6.79634	0.270453	10.0818	24.7085	39.6575	31.228												NLGN3	52.5172	29.2637	19.7776	2.8359	5.29025	8.23523	19.9952	30.3564
MBD3	29.7256	29.495	45.0994	5.93695	24.6662	22.9953	38.8909	47.9048												INPP1	27.2897	17.6063	19.7889	12.569	20.7689	14.9157	21.9835	21.5		MARK1	24.7345	13.7084	9.53894	0.401327	1.57702	7.88171	13.8302	6.28635
NLGN3	23.9632	41.2202	34.014	3.1878	5.47636	14.8797	23.393	32.3404		HSD11B1L	8.81019	26.4407	30.4514	25.0924	27.7729	39.405	33.3907	26.0493		NRXN1	22.832	28.855	13.878	0.701991	3.54759	9.24767	20.9781	19.1911		INPP1	22.2782	17.2242	13.1633	7.9448	20.5106	19.1709	17.3919	22.6631		MARK1	23.3638	12.1368	15.6089	0.892456	0.820061	5.12398	12.1798	5.08554
										MARK1	23.2265	17.1499	19.9291	0.934721	2.14469	6.333	13.1062	5.67501		SCN2A	17.4004	15.9226	12.0028	3.00172	4.229	14.0256	24.1195	15.0489		NRXN1	35.0137	14.2572	16.7179	0.243588	0.400751	9.35592	29.727	16.9489		RIMS3	12.9831	1.03908	11.3879	0	1.88732	28.7957	34.339	15.989
DAB1	15.9997	24.1142	6.74214	0.311513	0.425808	1.91344	3.49337	2.57686		INPP1	20.648	15.6115	18.5657	14.0913	14.018	11.9671	20.2788	22.6496		SLC4A10	5.75751	2.34499	6.96981	1.28434	3.64575	7.8658	21.4074	10.7239		SCN2A	15.9389	7.8535	14.1794	1.87202	0.84101	14.332	29.7083	11.716		INPP1	15.878	12.9853	20.204	9.01169	17.6293	10.9247	19.3791	22.2008
MARK1	22.1577	18.6097	17.9228	0.29013	0.663087	8.77078	14.1516	6.38843		SCN2A	25.3815	11.4209	33.186	2.31462	1.72659	14.4577	29.4586	10.8389		FEZF2	16.1514	36.352	17.3824	1.2771	7.21552	7.82806	10.8117	7.12614		SLC4A10	8.29722	1.26868	6.63493	0.827408	0.703054	9.01452	23.0548	7.70913		SCN2A	11.1731	4.24341	20.9521	2.52733	1.03289	9.28535	30.7825	8.98479
INPP1	19.265	15.4575	14.773	10.4125	14.5001	10.5503	18.9703	20.505		SLC4A10	13.1028	1.31974	17.6269	0.880703	1.45327	9.06959	25.5727	8.15113		CDH10	22.1177	22.3427	16.1418	1.61089	2.80773	12.2875	16.5919	9.21063		FEZF2	12.0532	32.0701	21.6688	0.787474	10.3022	6.03881	7.13905	6.29755		SLC25A12	10.2633	11.8536	14.7538	0.757207	3.49817	12.8762	22.029	9.62343
NRXN1	25.7467	27.8334	37.9919	0.77469	0.760014	12.592	28.0353	14.7036		FEZF2	9.20779	28.2803	13.8902	2.20045	3.30987	7.0705	9.03603	8.46252		DPP6	14.291	20.6594	18.2244	1.00805	3.96276	13.6362	17.4419	14.8134		CDH10	24.7916	22.499	11.5901	1.01723	3.65315	10.2558	17.4931	8.10663		SLC4A10	6.54108	1.06124	13.8632	0.708068	0.878425	7.18766	24.3963	7.10396
SCN2A	14.3834	15.4775	23.9197	3.25542	0.830136	18.2035	32.4565	7.38863		CDH10	25.0761	22.3489	21.5392	2.3342	3.13019	11.4438	17.474	8.90904		NRCAM	22.8565	22.3311	16.6728	1.77504	6.36389	14.2888	38.5529	31.4667		AUTS2	32.7314	23.4366	5.649	0.30778	0.414508	2.57355	3.92573	4.18276		PCDH10	20.6153	11.0187	19.9186	1.02853	3.11883	13.6133	24.5403	23.8168
SLC4A10	8.46894	1.5572	11.7308	1.22719	0.626192	10.8968	24.7651	7.15891		GRIK2	25.2219	5.56804	6.14881	0.244209	0.697864	1.56149	3.89828	2.50016		RB1CC1	17.6757	13.6664	7.29228	2.84681	4.26833	12.6325	29.8832	12.3389		DPP6	11.7628	10.7803	15.3791	0.408562	4.24588	12.4703	28.6238	13.1404		CNR1	32.1731	9.47575	19.9339	0.633541	0.502809	6.74015	19.3018	5.40078
FEZF2	15.0818	25.4225	15.9369	0.825254	5.72087	6.19484	11.3514	10.9105		AUTS2	25.8869	30.0242	7.88993	0.932328	0.349937	3.58735	3.49764	4.25834		SLC1A1	15.3655	21.4318	12.2347	0.730845	2.28864	7.03485	10.721	8.64528		RB1CC1	17.9975	8.92099	7.98936	1.85529	1.69454	14.1782	27.773	11.6151		AUTS2	34.9372	13.8722	4.3159	0.194732	0.43887	1.78604	3.32815	4.72748
CDH10	20.8421	18.3679	15.6019	1.08051	1.96512	11.0932	18.6222	10.7946		DPP6	12.259	14.4927	24.1763	1.15459	2.20342	12.5721	23.9707	12.4249		CADM1	23.7481	31.0339	16.9102	5.72304	4.72204	7.84204	21.9081	24.5413		LZTS2	9.3501	8.94169	10.8311	1.77777	12.791	12.2637	14.0704	22.0156		DPP6	18.0715	8.11836	15.411	0.511229	1.75506	6.93552	23.0295	10.8156
DPP6	11.3683	14.0839	23.8491	0.435412	1.41278	15.7918	28.6395	9.02926		RB1CC1	19.1475	9.47205	16.7535	2.76323	3.7314	12.4669	27.942	10.7484		VASH1	15.0818	27.6927	7.47661	1.61629	2.16056	4.08152	5.2372	6.15533		CADM1	29.7607	14.926	16.7577	3.39225	4.1434	8.26716	23.2198	25.1231		RB1CC1	6.69576	5.76044	17.3248	1.66641	2.4536	15.6447	27.7905	11.2752
RB1CC1	12.9477	14.0971	11.3503	1.9126	1.43043	11.2205	24.1609	14.1036		ASS1	2.53976	8.20219	5.36538	3.65616	11.9288	20.1693	10.7919	16.232		ARNT2	13.2574	19.9202	15.927	1.53552	6.41233	25.8182	35.4286	37.6924		HTR2A	1.04447	0.470687	8.34519	0.119146	1.74574	12.4968	30.3569	8.18918		ASS1	2.38346	3.01343	8.86629	2.60949	23.1988	21.1772	18.0066	10.5373
SDC2	1.72156	3.57706	14.5926	7.14878	2.81879	11.0892	10.7524	30.8848		SLC1A1	18.0671	21.2782	18.1558	0.656628	2.11371	8.12327	11.0019	7.51921		UBE3A	20.0818	20.5136	9.273	1.39582	3.58696	10.1078	19.6663	12.6644		NBEA	20.403	8.79342	5.60074	0.417766	0.168287	4.36513	9.06767	5.10548		DAPK1	21.1838	7.79111	4.89611	0.118394	0.30309	2.8522	6.02533	4.46638
ASS1	2.84789	7.98858	6.24115	2.66898	19.367	22.1321	7.55207	7.14677		LZTS2	5.30441	9.78788	9.53747	5.1593	5.01092	9.29158	10.8677	20.8197		A2BP1	10.7075	17.9444	11.4008	0.53065	8.443	13.9039	24.5023	17.773		LRFN5	19.9495	20.3977	11.3886	0.627656	4.18277	12.0395	15.3555	9.5269		LZTS2	20.9313	12.9673	6.20151	1.55007	7.13095	5.86759	8.41865	20.3254
SLC1A1	10.9819	24.1269	15.0172	0.422554	1.02257	9.92453	11.1118	5.82524		CADM1	24.6501	19.7636	32.7096	6.02181	2.7715	7.22181	18.0345	20.7717		ABAT	12.0157	20.2978	20.7459	3.08939	5.63428	20.624	30.1764	28.949		VASH1	25.2168	12.1225	12.7214	0.505142	1.87008	4.06669	6.55188	8.20631		CADM1	37.7669	9.09609	19.8178	3.203	2.84396	4.56658	16.0856	21.0696
LZTS2	13.9876	9.40923	11.2241	1.76595	6.99645	6.66292	16.5901	20.5579		HTR2A	0.961492	0.726333	12.8645	0.301637	1.44133	14.0806	25.2723	7.56959		SYT17	2.42827	6.16478	23.8917	1.57714	4.91695	19.2432	17.4182	8.61709		NDNL2	13.9155	23.293	12.8559	2.88252	18.4538	17.0105	14.325	14.0439		DHCR7	32.2205	34.7458	6.64956	3.01875	6.14647	12.936	11.3817	24.5617
CADM1	23.5759	22.6314	29.5484	4.21011	2.54499	7.69246	20.9638	31.2215		MYO16	18.5741	21.2182	13.6181	0.382158	0.697352	1.59989	2.34395	1.471		MBD3	12.2606	31.6356	31.2201	7.68971	33.099	20.7227	25.8401	35.1796		UBE3A	24.8359	15.9448	9.11127	1.14286	0.871176	11.7857	16.8954	10.9701		HTR2A	0.659363	0.437828	5.60988	0.894819	0.832421	8.53476	26.7507	5.64085
HTR2A	0.636018	1.3186	9.86328	0.606821	0.496648	19.1886	32.2568	4.45146		NBEA	24.1221	11.102	14.531	0.575176	0.562072	4.89489	8.782	4.49209		CBS	19.0699	27.384	8.98608	3.89434	2.96366	4.86016	5.36074	12.6157		A2BP1	16.1953	12.0323	21.7869	0.150653	2.58047	15.8383	38.9484	14.8166		UBE3A	10.7883	9.37563	18.2668	2.56054	1.59368	10.2464	24.1131	9.04863
MYO16	17.4291	20.5299	13.3346	0.20897	0.502281	1.89536	3.18631	1.62085		NDNL2	10.8063	24.2246	19.6958	7.3241	8.16439	20.668	17.4169	17.3233		SHANK3	2.3082	6.37042	17.113	1.52206	9.25919	13.2021	21.6288	21.6151		ABAT	16.0809	9.28975	28.564	1.65636	4.54898	14.4346	28.635	29.3024		A2BP1	31.944	12.7756	17.673	0.675949	1.5039	10.9174	32.3412	11.7133
VASH1	31.6038	26.1161	17.4984	0.516047	1.09149	3.24062	7.33465	8.37708		UBE3A	26.2166	15.9674	18.5993	1.58122	4.21289	9.89523	20.8145	9.63556		GLRA2	27.2747	28.084	10.6802	0.230142	0.545153	1.92888	3.9604	1.48963		GRIN2A	1.48352	0.332357	12.2862	0.378254	1.31707	9.74081	26.4489	8.71519		ABAT	19.2758	5.97963	30.3766	1.39421	2.5909	17.5184	27.6181	23.7239
NDNL2	14.1512	25.366	17.7049	2.62617	12.3411	18.9916	15.4807	13.119		ABAT	15.4855	13.7069	33.4904	3.67415	2.91753	18.3101	34.3455	24.5992		PSMD10	32.5442	30.5508	24.8818	10.3556	16.467	27.8023	33.03	25.6833		SYT17	2.58116	3.12276	23.7708	1.09912	6.39971	10.0188	17.3569	8.76993		GRIN2A	2.45188	0.473613	12.5218	0.81966	0.684226	4.62597	23.2125	6.32483
UBE3A	16.9092	23.3405	15.2312	1.99098	1.21708	11.4471	18.9536	9.08728		ANKRD11	11.9185	7.00005	23.0249	2.18582	1.76205	7.67064	11.847	12.6753		SLC9A6	14.6551	21.438	13.1578	0.542007	3.0665	14.5381	18.8944	16.8067		BZRAP1	6.5461	2.40691	20.3021	1.10838	4.90167	7.94211	29.0419	17.4267		SYT17	3.27647	2.49085	23.335	1.58614	4.73398	8.5518	17.2165	7.93881
ABAT	13.3304	17.5208	34.3286	0.723393	1.80278	19.5988	33.3298	37.0193		GRIN2A	1.20387	0.352374	30.004	0.620412	1.93106	11.1553	28.9887	7.82522												CDH22	3.08466	4.49403	11.7671	0.114222	9.35661	10.9572	21.7279	15.7572		TSC2	20.0019	15.1101	4.72052	0.941547	1.95286	5.30539	6.55256	8.79097
ANKRD11	16.9861	7.53358	20.3454	1.75257	1.64342	8.18361	14.9883	13.4655		SYT17	2.25214	3.87085	29.6758	2.56469	4.94796	13.3701	17.3022	7.90859												SHANK3	3.53624	2.93925	37.1941	0.668695	7.16421	10.2805	29.9129	22.2336		DMPK	28.728	15.5866	7.85761	1.04676	2.79336	3.44144	3.24557	5.66819
GRIN2A	0.803211	0.834467	23.766	0.504712	0.938505	15.3272	30.1804	5.11421		BZRAP1	6.13552	3.59577	22.0387	3.40312	4.58672	8.91207	18.8159	13.7904		CA6	0	0	0	0	0	0.059908	0	0		GLRA2	27.0321	28.0818	8.16372	0.076779	0.521692	1.81211	2.41619	1.45163		GLRA2	31.9416	18.689	11.4971	0.068555	0.54858	2.60303	3.70248	1.53534
SYT17	1.45469	2.75172	23.4947	1.40309	3.11663	14.2203	16.514	14.0254		MBD3	12.1773	29.1634	38.9704	14.9733	16.4568	26.4234	31.9433	35.3138		DISC1	0.15167	0.202133	0.300948	0	0.121819	0.304067	0.606759	0.808674		NLGN3	24.0622	33.6349	27.6498	3.58977	8.88285	16.7293	25.7807	30.6503		PCDH19	21.8777	2.60292	7.34933	0.257476	0.141431	3.22938	6.52101	2.19533
BZRAP1	9.66832	3.45234	22.0457	0.734179	3.1246	7.70973	27.7035	28.7258		CBS	19.0209	27.6449	12.1773	4.40795	2.24923	5.19396	5.91624	11.6749		DPYD	1.77114	1.55426	0.497405	0.103563	0.368176	0.690963	1.23441	0.67943		PPP1R3F	6.1967	7.56764	17.8542	0.821256	12.0748	14.5516	21.5382	15.934		PSMD10	34.3507	34.675	34.4144	7.33332	22.1955	32.2046	38.2175	25.7163
DMPK	22.4281	10.6591	8.48676	1.38437	2.83866	2.79578	6.9915	10.3679		SHANK3	4.47613	5.47245	30.5785	2.6071	2.35949	15.3801	26.8259	18.7693		GSTM1	0	8.84687	0.338108	0.075865	1.08546	11.8297	5.48491	0.676532		PSMD10	31.6569	34.8778	15.037	6.96007	17.351	29.173	25.613	25.5598		SLC9A6	18.1423	6.61668	17.4806	0.368314	0.485612	14.1129	25.2739	11.9347
CDH22	6.22511	6.71468	13.4464	0.417601	4.18358	18.6436	27.8484	11.7634		GLRA2	26.9772	29.4939	11.0041	0.317726	0.904174	1.3811	2.29266	1.14887		MARK1	19.688	19.1608	9.93095	1.17785	2.68398	7.55358	11.2373	7.27317		SLC9A6	15.3393	14.5543	16.9737	0.2428	1.23822	15.997	25.2708	13.9266
CBS	21.2	19.4495	13.8173	2.0862	1.95963	5.00656	8.68564	16.0476		PSMD10	25.6437	35.061	29.1139	12.5746	19.9127	29.9474	30.844	25.8728		MTF1	0.735033	0.966899	0.574575	0.247078	0.377381	0.886036	1.51731	1.88616
SHANK3	7.44914	5.00233	31.8833	0.813905	3.29453	13.4801	35.8164	32.1563		SLC9A6	18.179	19.3435	26.6399	0.630189	1.51045	16.5683	22.8577	12.9822		NOS1AP	1.60057	2.5114	2.80859	0.097178	0.969706	2.07466	3.29966	3.16201												CA6	0	0	0	0	0	0.014674	0	0
GLRA2	26.7883	34.5273	11.0449	0.064537	0.333806	0.935278	1.90524	1.62577												NTNG1	0.41823	1.03251	5.21317	0.626946	1.51196	3.70623	4.77534	3.74209		CA6	0	0	0	0.042636	0	0	0	0		DAB1	15.788	7.20913	4.43072	0.351604	0.612145	1.81882	2.01399	1.18051
PPP1R3F	7.00624	7.3794	17.3062	1.71165	6.3227	18.2532	24.5563	19.2795												NTRK1	0.093049	0.186868	0.040213	0	0.036209	0.053352	0.023921	0.139809		DAB1	17.6072	12.1447	4.00145	0.417331	0.674806	1.13764	3.58322	1.89403		DISC1	0.397965	0.215481	0.510953	0.068628	0.044336	0.466137	0.523182	0.75522
PSMD10	22.0717	30.762	30.4389	7.40398	8.86263	31.1344	30.5141	21.01		CA6	0	0	0	0	0	0	0	0		OR1C1	0	0	0	0	0	0	0	0		DISC1	0.277106	0.13219	0.389124	0.058972	0	0.420922	0.339444	0.88921		DPYD	1.82297	0.804847	0.757617	0.157702	0.160958	0.712299	1.00833	0.736975
SLC9A6	14.6104	23.2944	23.7742	0.307162	0.690568	21.3119	27.8595	13.4247		DAB1	18.9084	18.7788	7.06391	0.493247	0.284062	1.94229	2.69791	1.46969		PTGS2	0.220389	2.29365	0.741079	0	1.83493	0.563507	3.10879	1.10846		DPYD	1.72143	0.801102	0.231671	0.068789	0.17726	0.802794	1.04718	0.757096		GSTM1	0.367064	8.57372	0.207825	0.065616	0.719162	15.0989	5.71083	1.01641
										DISC1	0.243833	0.226104	0.854446	0.034846	0.121376	0.174549	0.553742	0.684593		RFWD2	12.7127	12.5029	5.32799	0.876823	2.67848	4.35235	4.88421	3.73263		GSTM1	0.12424	8.23955	0	0.033823	0.290821	10.6006	5.08359	0.559095		MTF1	1.51966	0.305866	0.978772	0.020198	0.074284	0.500784	1.62668	2.18236
										DPYD	1.63403	0.651967	0.571772	0.192611	0.26186	0.663289	0.933111	0.656477		AGAP1	2.60463	4.72027	2.47197	0.246885	2.02854	5.63144	8.48971	7.68014		MTF1	1.58949	0.485464	0.750113	0.035168	0	1.02711	1.30412	1.97795		NOS1AP	2.37354	0.895795	3.34707	0.155848	0.144085	0.995244	3.91981	2.46522
CA6	0	0	0	0	0	0	0	0		GSTM1	0	9.53628	0.058087	0.255089	0.841651	10.3701	5.02262	0.621317		CNTNAP5	0.429526	0.596917	0.760179	0.113735	1.0666	0.954175	2.2709	1.61007		NOS1AP	2.33811	1.47802	3.17469	0.068967	0.506141	2.43504	5.03284	2.55821		NTNG1	3.26867	2.30023	5.24521	0.292079	0.505775	1.5252	5.62302	2.54649
DISC1	0.175145	0.481566	0.900587	0.066845	0.05884	0.241233	0.584936	0.810637		MTF1	1.8101	0.76207	1.57805	0.145056	0.108142	1.10817	1.39515	1.31587		DLX1	7.25165	15.9777	8.01556	0.111566	1.49704	3.24987	3.7419	3.44892		NTNG1	1.12427	1.96461	5.08729	0.20935	1.66154	3.93717	6.84091	3.36658		NTRK1	0.271256	0.210813	0.038875	0.094499	0.132319	0.132062	0.041158	0.065653
DPYD	1.07116	0.856363	0.566452	0	0.144463	0.472915	0.738608	0.866333		NOS1AP	2.11508	2.04146	5.73499	0.133186	0.546497	2.21559	4.81775	2.5434		DLX2	2.85152	10.7508	1.06989	0	0.658956	1.01077	0.639205	0.916408		NTRK1	0.111055	0.118783	0.104836	0.033523	0.166967	0.020668	0	0.120732		OR1C1	0	0	0	0	0.044836	0	0	0.045263
GSTM1	0.347673	7.63531	0	0.130599	0.576747	10.3909	4.99939	0.928306		NTNG1	0.94466	1.51337	8.49315	0.882736	1.99212	3.76348	6.41187	2.95156		DPP10	4.79719	3.33668	6.20827	0.31939	1.70293	5.51901	9.81436	5.21458		OR1C1	0	0	0	0	0.449554	0.045755	0	0		PTGS2	0.03274	1.13755	1.74558	0.054746	0.292891	1.60504	3.86502	1.16024
MTF1	1.5288	1.3284	1.35389	0.111681	0.037053	0.763973	1.35838	1.09707		NTRK1	0.158493	0.101654	0.03564	0.082132	0.095989	0.064159	0.162723	0		GALNT13	2.73378	3.19565	2.08483	0.89057	1.46352	2.6254	5.62567	5.53769		PTGS2	0.188437	1.61342	2.90638	0	0.463773	1.10213	4.21058	0.857336		RFWD2	8.62455	11.1139	5.83946	0.922013	2.84929	5.03578	6.24533	3.83308
NOS1AP	2.49206	2.059	4.18457	0.036479	0.298651	2.61001	4.6946	2.60849		OR1C1	0	0	0	0	0	0.047171	0	0		ITGA4	0.564861	0.489718	0.175126	0.034992	0.030995	0.194713	0.395598	0.243186		RFWD2	9.70039	13.8482	5.41881	1.00196	3.80353	5.08988	4.4237	3.59766		AGAP1	6.19976	1.71944	5.09246	0.177716	0.680899	4.86396	8.36659	8.46098
NTNG1	0.418615	1.19866	7.93609	0.319778	0.676515	5.66167	6.2468	2.06622		PTGS2	0.253091	1.04383	3.06699	0.051021	0.280721	1.0841	8.31551	0.971517		NPAS2	2.1602	2.70753	7.18056	0.686439	2.41905	7.05975	9.63182	8.26535		AGAP1	3.73173	1.52762	4.97345	0.199609	0.538867	5.86798	8.79702	9.09937		CNTNAP5	1.27379	0.161062	1.86261	0.215603	0.106787	0.684425	2.1631	1.05668
NTRK1	0.18612	0.186515	0.121322	0	0.033112	0.107778	0.075547	0.118256		RFWD2	9.42728	11.7943	5.00087	1.58007	3.26661	4.83225	4.69916	3.72961		NRP2	3.38506	5.19501	0.873269	0.110762	0.558088	0.896644	1.78378	1.44482		CNTNAP5	1.09433	0.23922	1.16559	0.098584	0.113998	0.915282	3.1254	1.48895		DLX1	18.2601	15.1286	7.72606	0.197161	1.31156	4.15149	3.34153	2.45869
OR1C1	0	0.049483	0	0	0	0	0	0		AGAP1	4.27248	1.73838	6.98289	0.423262	0.586095	5.33565	8.59187	6.27391		SCN1A	1.0457	0.410644	0.925331	0.398668	3.47244	2.16862	4.5411	7.70892		DLX1	15.1126	10.7382	7.29877	0.188288	1.52767	2.90721	3.72558	2.40785		DLX2	9.65975	13.2674	0.869659	0.094727	0.352689	0.681188	0.793926	0.621711
PTGS2	0.147849	3.98384	1.59289	0.052243	0.114734	1.14953	3.46837	0.407528		CNTNAP5	1.30649	0.32654	3.77807	0.092714	0.162244	1.04005	2.85707	1.08322		SLC25A12	9.99101	11.5258	12.1188	1.08507	5.90042	12.8329	15.0878	11.8472		DLX2	6.26063	7.56757	4.02262	0.052685	0.402592	0.655604	0.739253	0.484603		DPP10	3.43217	4.00369	9.32372	0.743042	0.874778	7.05808	12.9472	4.12735
RFWD2	7.41846	13.4584	3.31413	0.700093	2.32321	5.02531	4.04478	2.70386		DLX1	7.10068	12.5729	7.76136	0.628739	1.93179	3.7137	3.78647	3.9377		STK39	3.50231	3.37469	7.65541	1.41436	3.84289	9.50507	16.1214	15.2287		DPP10	4.30993	4.12623	7.47256	0.414496	1.85473	5.17472	11.6143	4.52312		GALNT13	1.39577	1.00743	5.03578	0.827721	0.967288	2.81614	6.36861	3.87502
AGAP1	4.7374	3.81278	6.48787	0.347778	0.385128	4.93673	9.32322	5.33487		DLX2	3.28776	7.68193	1.62086	0.088282	0.406218	1.17938	0.480457	0.622331		TSN	12.1288	17.9666	11.6427	3.62678	6.60118	14.4533	15.1952	12.6143		GALNT13	2.25609	1.19677	1.63346	0.666545	0.496616	3.39418	6.11235	4.84689		ITGA4	0.267918	0.114144	0.572901	0.021321	0.013376	0.052588	0.214998	0.120614
CNTNAP5	0.859104	0.889159	2.81228	0.077762	0.176427	1.42604	4.13864	1.16205		DPP10	6.4684	5.56076	10.0368	0.655911	2.21241	5.68087	11.8763	4.64722		ALOX5AP	0.065508	1.14725	2.16057	1.94677	4.16665	0.565082	4.64075	1.90666		ITGA4	0.215756	0.156145	0.17813	0.015868	0	0.147196	0.433484	0.263053		NPAS2	5.22524	4.51265	7.20358	0.601236	1.63031	6.27108	10.147	7.48983
DLX1	14.4311	17.2006	11.3114	0.244464	0.741582	3.84835	2.45243	6.03774		GALNT13	3.0169	1.73595	5.86224	0.966277	1.66328	2.28859	7.28137	4.67231		C3orf58	1.20103	3.32216	1.8335	0.152631	1.67923	4.08161	5.71794	6.00993		NPAS2	2.18812	2.39668	10.8598	0.494883	2.27252	6.16504	12.4539	8.43594		NRP2	3.25637	1.73057	0.903656	0.192807	0.068888	0.851576	1.59387	1.1158
DLX2	5.16849	11.3036	2.05966	0	0.159682	0.857033	0.968195	1.45652		ITGA4	0.580554	0.337945	0.419272	0	0.007867	0.06941	0.242043	0.107781		CACNA1D	0.982041	0.639612	0.793695	0.108117	0.253201	0.649875	1.04293	1.10858		NRP2	2.7568	1.76941	0.356373	0.106779	0	0.563508	2.54001	1.60709		SCN1A	0.791859	0.127114	2.0466	0.225027	0.112348	1.92993	8.17779	4.04422
DPP10	2.95021	4.53422	7.11049	0.337059	0.93941	6.58152	10.5339	3.61407		NPAS2	2.30777	2.35788	9.30811	1.10678	1.34223	6.9591	13.7672	8.18219		CNTN4	5.93529	6.64103	3.01277	0.277722	0.850336	3.14266	4.90975	3.4599		SCN1A	1.2077	0.218095	1.26999	0.129125	0.139864	2.27061	5.70615	4.44579		STK39	3.05487	2.33118	11.6289	0.804034	2.53775	7.14474	18.3369	12.6546
GALNT13	1.72105	2.21666	3.49135	0.4267	0.509513	3.35479	6.95616	3.85927		NRP2	3.48344	2.21126	1.63444	0.286229	0.076339	0.870082	1.91668	1.66911		DCUN1D1	8.31023	8.08354	4.69544	1.58863	2.76301	6.66582	14.0006	11.5118		SLC25A12	9.98418	10.6796	15.4343	0.518663	5.50305	14.014	15.8219	8.88854		TSN	8.48918	10.0881	17.3735	2.05856	5.14153	18.1288	18.0823	11.6797
ITGA4	0.233634	0.64414	0.417638	0	0	0.12458	0.477972	0.23169		SCN1A	1.21659	0.170629	2.49791	0.250126	0.377015	2.24378	9.02165	4.88228		DRD3	0	0	0.084662	0	0	0	0.050361	0.036667		STK39	5.99518	3.00899	6.74613	0.951213	1.70165	12.4504	15.9584	14.1737		ALOX5AP	0.566747	1.49673	2.06475	1.03858	2.75141	1.62151	3.18152	2.8296
NPAS2	2.08151	2.7376	7.62324	0.526844	1.00555	7.37822	12.7954	7.75849		SLC25A12	12.5344	11.399	15.8505	1.95728	3.89081	16.0855	19.4844	9.18915		FBXO40	0	0.003267	0	0	0.11657	0.279624	0.433574	0.362604		TSN	17.9337	15.976	10.6793	0.964771	3.71761	18.1585	18.4722	14.0589		C3orf58	3.39585	1.82848	3.15148	0.198729	0.36858	3.601	6.24576	6.09424
NRP2	2.14238	3.02856	1.36604	0.104615	0.210864	1.31353	1.80855	2.08394		STK39	5.31078	3.93465	11.5447	1.59973	4.14083	9.03077	18.9145	13.4912		FHIT	0.947535	1.9418	3.90112	2.26259	4.89907	4.27504	3.64137	2.83051		ALOX5AP	0.062078	1.7522	2.99472	1.30501	1.71981	1.04785	5.5434	2.15905		CACNA1D	1.39833	0.278156	1.1434	0.060065	0.036859	0.336576	1.19972	0.81282
SCN1A	0.826805	0.235191	1.56418	0.317441	0.082463	3.65646	8.12814	2.44907		TSN	13.1854	15.0438	17.2915	4.58389	7.43426	15.2586	17.4487	12.4765		HTR3C	0	0	0	0	0	0	0	0		C3orf58	2.86146	2.87985	3.68118	0.075033	0.280897	8.81018	7.59212	6.43979		CNTN4	2.8518	1.89422	3.30478	0.123533	0.20286	1.76196	4.61811	1.74674
SLC25A12	8.45196	12.3665	12.0128	0.94725	2.06019	16.5237	19.7276	7.81295		ALOX5AP	0.048129	1.76698	2.53039	1.32058	2.07412	1.01498	3.63147	2.81157		MBD4	11.1942	6.29896	7.30651	1.95033	3.7089	6.57846	8.21903	6.15188		CACNA1D	1.26374	0.394376	1.00036	0.039509	0.078419	0.462836	1.27069	0.859645		DCUN1D1	4.89037	3.43921	10.8228	0.906077	2.40057	8.30827	15.1127	8.10675
STK39	4.06929	3.41418	8.20066	1.44195	1.89799	9.59751	17.3759	8.45734		C3orf58	2.32313	3.82016	4.91289	0.598363	0.65864	5.03702	8.59715	4.97506		NLGN1	6.35143	5.94805	4.81787	0.557184	1.05169	3.03877	6.8251	4.58065		CNTN4	7.62944	5.8803	2.75408	0.173881	0.737526	2.69378	5.59623	2.30495		DRD3	0	0	0.04149	0	0.035058	0	0	0
TSN	11.2094	18.1913	16.1793	1.10082	4.64785	15.9503	14.4238	12.2755		CACNA1D	1.85905	0.503987	1.233	0.091834	0.083778	0.551561	1.08966	0.66556		OXTR	0.098047	0.401537	0.131903	0	0.084385	0.067595	0.707443	0.26013		DCUN1D1	8.33046	4.90968	3.71506	0.835567	2.18117	9.53284	10.8726	9.96606		FBXO40	0	0	0.07144	0	0.037017	0.395555	0.557029	0.27919
ALOX5AP	0.170749	2.49	1.17227	1.15189	2.90198	0.520622	2.99374	3.29253		CNTN4	11.0041	9.15277	7.50142	0.257276	0.631029	2.53521	5.94334	2.41807		SLC9A9	0.2916	0.633251	0.53288	0.456244	0.565786	0.875958	2.33598	2.19742		DRD3	0	0	0	0	0	0.003384	0	0.031963		FHIT	0.593773	1.65456	2.57733	2.06725	3.50244	4.33724	3.30579	4.05049
C3orf58	1.59148	3.09062	4.46915	0.063501	0.31984	5.88832	6.93273	3.60678		DCUN1D1	10.9347	5.71293	11.4443	1.15208	2.62225	7.32214	13.7918	8.77617		SUCLG2	0.410614	0.937478	1.61564	0.855718	0.850191	2.12473	2.06166	4.05314		FBXO40	0	0	0	0	0	0.222824	0.292053	0.334653		HTR3C	0	0	0	0	0	0	0	0
CACNA1D	1.77259	0.573459	1.34695	0.082045	0.108201	0.545332	1.32088	1.1903		DRD3	0	0	0.081959	0	0	0.036884	0	0.035553		XPC	4.47094	3.07472	2.64554	0.510762	1.06788	3.15286	3.54125	5.46937		FHIT	1.24005	1.69434	1.67567	1.83344	3.66718	2.70355	3.71691	2.99754		MBD4	6.25857	6.94875	8.25158	1.37339	4.22437	6.25457	9.02641	5.57128
CNTN4	8.6224	11.6145	5.19691	0.206901	0.293236	3.84567	5.15609	2.62192		FBXO40	0	0	0.096731	0	0	0.432063	0.563048	0.182528		EIF4E3	4.65784	7.19779	5.88669	1.48656	2.74278	8.31475	11.5052	6.27861		HTR3C	0	0	0	0	0	0.031529	0	0		NLGN1	7.6194	2.9983	7.27092	0.538761	0.141024	2.33608	7.20496	3.64977
DCUN1D1	7.18645	8.51437	9.16507	0.738319	1.35348	7.51754	12.709	6.0836		FHIT	0.614388	1.22316	3.49908	2.55752	2.8066	4.2347	3.33873	4.04549		GABRA4	1.9369	2.42785	5.7802	0.591205	3.26617	5.02158	11.4348	4.50388		MBD4	9.45989	7.40963	6.3707	1.66078	5.16999	6.09618	7.37821	5.76467		OXTR	0.398954	0.078907	0.303729	0	0.072336	0.072073	0.142299	0.255585
DRD3	0.026501	0.038692	0.257157	0	0	0	0	0		HTR3C	0	0	0	0	0	0	0	0		GABRB1	1.44847	1.78605	1.31502	0.532881	0.721115	1.40662	5.82968	5.75491		NLGN1	6.64517	4.23941	4.90792	0.172944	0.244857	4.70764	6.80152	4.28322		SLC9A9	0.100629	0.483958	0.902245	0.473416	0.360567	0.826837	1.62252	3.00511
FBXO40	0	0.043815	0.218403	0	0.008534	0.529548	0.273863	0.211445		MBD4	10.5012	7.54789	7.85827	3.15422	4.19749	4.89516	8.25282	6.89659		TDO2	0.046275	0	0.203289	0.24514	0.079655	0.415177	0.178574	0.143807		OXTR	0.049171	0	0.162016	0.109866	0.362642	0.258365	0.36387	0.731191		SUCLG2	0.408239	0.754561	2.33213	0.653144	1.20545	2.69182	1.74848	3.95944
FHIT	0.816415	2.13349	4.81586	2.24673	3.3281	2.97049	2.44496	2.55638		NLGN1	6.99822	3.24553	9.92724	0.35215	0.438904	3.45295	6.92146	3.38455		ADRB2	0.186123	0.769336	0.580303	0.452113	1.01958	0.5098	0.446861	0.614555		SLC9A9	0.322344	0.159862	2.20192	0.069227	0.31746	2.42315	1.51281	3.3138		XPC	6.08939	2.36815	3.09271	0.196773	0.646906	1.77428	3.11703	6.01953
HTR3C	0	0	0	0	0	0	0	0		OXTR	0.247797	0.082516	0.352501	0.159043	0.209901	0.038051	0.242161	0.405935		CDH9	1.69253	1.72013	5.72598	0.486798	0.835303	2.86698	5.24772	2.90373		SUCLG2	0.868696	0.935023	1.01468	1.03676	0.493405	2.13446	1.26455	3.90566		EIF4E3	5.5005	4.30035	10.4829	0.144982	2.64086	12.6019	14.4316	4.58333
MBD4	9.00619	6.1142	4.73162	1.24216	2.8614	5.67877	9.82644	5.80417		SLC9A9	0.197707	0.451223	1.12513	0.373817	0.429168	0.819828	1.67656	2.79267		PITX1	0	0	0	0	0	0	0	0		XPC	6.22703	2.12855	2.52963	0.118978	1.21403	3.93919	4.09293	6.39169		GABRA4	1.81578	2.26138	6.11196	1.11643	1.62448	3.70423	13.7192	3.53291
NLGN1	4.58556	4.63935	8.63207	0.340277	0.257889	3.92949	6.82852	3.23097		SUCLG2	0.642384	1.08971	1.95687	1.50235	1.02954	2.40798	1.66249	3.46962		SEMA5A	0.47268	1.84185	0.756682	0.343406	0.460827	1.12614	3.64738	2.14697		EIF4E3	8.04544	5.23258	7.81215	0.169003	2.83108	7.65529	14.7674	5.94425		GABRB1	1.41512	0.632175	2.67216	0.633369	0.346485	0.933447	4.09811	4.72091
OXTR	0.215791	0.039917	0.265297	0.146347	0.006803	0.009961	0.492254	2.13806		XPC	4.63863	2.82333	4.67467	0.643174	1.13764	2.37009	3.67037	6.2677		AHI1	3.46142	1.35759	2.18026	0.744533	0.997919	1.29825	4.9292	2.80361		GABRA4	2.76262	2.96353	5.82185	0.720847	4.03174	4.2329	13.4814	3.73411		TDO2	0	0.149476	0.325446	0	0.045058	0.382759	0.469302	0.137399
SLC9A9	0.207956	0.43017	0.594922	0.304003	0.230557	0.871362	1.93613	2.27616		EIF4E3	8.0942	7.72931	10.1456	0.513081	4.01592	10.3167	14.4318	5.15407		ALDH5A1	4.19298	7.57642	6.8794	0.767208	2.16525	6.14587	11.2407	11.624		GABRB1	2.51837	0.637826	1.91038	0.195767	0.364827	1.02162	5.24448	5.09739		ADRB2	0.269692	0.611807	0.488654	0.48265	0.568131	0.373704	0.339392	0.561444
SUCLG2	0.27917	1.61396	1.21238	0.707008	0.309611	1.29454	0.884505	4.31889		GABRA4	3.63294	3.47765	11.5404	1.14722	1.92434	5.02684	13.5626	3.27363		STK19P	0	0.041318	0.012949	0.028056	0.037362	0.025224	0.023214	0.050166		TDO2	0	0.081363	0.60968	0.082792	0.17	0.070158	0.2023	0.073124		CDH10	15.3096	13.3814	13.8402	1.05338	1.37847	7.44976	17.3253	7.83493
XPC	6.21678	3.34298	3.33903	0.218619	0.700255	2.55131	4.53808	5.68417		GABRB1	2.80058	1.24183	4.64366	0.640727	0.534098	1.47604	4.26499	3.82618		ESR1	0.013534	0.045143	0	0	0	0	0.088254	0.021613		ADRB2	0.35769	0.698359	1.37465	0.226762	0.341878	0.278367	0.602007	0.764819		CDH9	5.38916	3.40795	6.84405	0.677938	0.965395	3.05897	4.94453	2.17571
EIF4E3	6.27629	7.82903	12.2318	0.534718	1.5927	11.2868	15.3379	5.90927		TDO2	0.047102	0	0.284087	0.134815	0.292498	0.531221	0.283802	0.138494		F13A1	0.023331	0.745677	0.689516	0.292867	0.200261	0.376042	1.72993	0.696883		CDH9	1.31345	0.833667	3.04266	0.236488	0.758857	2.75155	5.88307	2.51586		PITX1	0	0	0	0	0	0	0	0
GABRA4	1.69885	3.8759	8.83088	0.549628	1.6202	6.30313	13.9227	4.77255		ADRB2	0.046722	0.324832	0.632077	0.481216	0.411142	0.358724	0.570739	0.587823		FRK	0.034813	0.030737	0.06476	0.07362	0.059924	0.126356	0.160062	0.175404		PITX1	0	0	0	0	0	0.045658	0	0		SEMA5A	0.612309	0.194847	1.5516	0.091442	0.077696	1.41258	2.15042	2.72336
GABRB1	1.78191	1.59905	3.54898	0.38154	0.192937	1.65197	4.19693	6.10831		CDH9	2.03891	0.673967	7.8125	0.564721	1.71197	2.83819	6.44888	2.18997		GRIK2	14.9637	7.0002	3.47812	0.562143	0.83181	2.01504	3.86911	2.85496		SEMA5A	1.05917	0.494166	2.39762	0.135682	0.279108	1.01906	1.95087	2.83853		AHI1	1.19894	0.409934	3.78969	0.556316	0.37603	1.35725	5.15394	1.87147
TDO2	0	0.039475	0.497465	0	0	0.189343	0.311894	0.240809		PITX1	0	0	0	0	0	0	0	0		HLA-DRB1	2.93359	4.38657	4.99763	1.83933	13.4321	2.9926	8.74421	5.70275		AHI1	2.84069	0.53792	2.14571	0.560347	0.611151	1.41965	4.44235	2.62396		ALDH5A1	2.72132	1.57992	9.25161	0.825053	0.429812	7.30465	10.5813	10.192
ADRB2	0.136237	0.67736	0.250106	0.507265	0.273033	0.347459	1.44094	0.363208		SEMA5A	1.15758	0.850733	3.19038	0.199493	0.222899	1.24317	2.517	1.75021		HS3ST5	12.4775	9.92165	4.19815	0.173373	0.578793	3.52402	5.70395	2.72767		ALDH5A1	4.86807	3.29206	7.66276	0.300769	0.761528	5.96983	10.2238	11.4334		STK19P	0.013297	0.058651	0.01217	0.012479	0.00529	0.010613	0.013253	0.08032
CDH9	0.629283	0.821763	4.59279	0.42787	0.432134	3.28041	4.91045	2.73853		AHI1	4.58586	0.793814	5.29516	0.439274	0.588005	1.03283	6.06982	2.22212		HTR1B	0.4328	0.849243	0.307248	0.095751	1.07049	0.803792	1.21708	1.23118		STK19P	0	0.000432	0	0	0.053764	0.01087	0.015779	0.062854		ESR1	0.046194	0	0	0	0	0.12489	0.050729	0.02058
PITX1	0	0	0	0	0	0	0	0		ALDH5A1	5.22158	4.09806	12.8582	1.22435	0.487865	6.95213	10.7374	10.2194		KIAA1586	6.86669	6.29802	1.81	1.40179	1.38923	1.42898	5.38456	2.45609		ESR1	0.032958	0	0.091319	0	0	0.057351	0.119976	0.021831		F13A1	0.107817	0.397862	1.12559	0.119369	0.132154	1.10265	1.87223	0.38484
SEMA5A	0.498393	1.5394	4.19678	0.028955	0.109127	0.946961	1.8044	3.28801		STK19P	0.004369	0.036287	0.025247	0	0	0.027902	0	0.124406		LRRC15	0	0	0	0	0	0.022563	0	0		F13A1	0.046173	0.419265	0.990439	0.031652	0.085711	0.376294	2.27751	0.553961		FRK	0.043322	0	0.053107	0	0.045769	0.13718	0.126961	0.357893
AHI1	3.12606	0.789408	3.59992	1.10612	0.34769	1.35319	4.8319	1.97736		ESR1	0.065305	0	0.049671	0	0.022783	0.085789	0.168772	0.00447		OPRM1	0.038985	0.022948	0.144021	0.018568	0.05329	0.101712	0.822205	0.210532		FRK	0.071914	0.130526	0.124357	0.036925	0	0.514155	0.080587	0.443123		GRIK2	6.56238	1.80144	4.72831	0.500092	0.310622	1.04008	4.26158	2.20113
ALDH5A1	3.86092	6.43034	8.98336	0.634997	0.32882	7.63471	9.23232	13.777		F13A1	0.184884	4.10932	1.95564	0.336281	0.317442	0.562701	2.21323	0.631894		PARK2	0.919878	1.09965	2.81088	0.146211	1.01081	2.703	4.60703	2.74334		GRIK2	16.0631	4.31018	2.60748	0.118188	0.467173	1.69003	3.44399	2.74095		HLA-DRB1	2.05498	1.89263	4.69238	1.61954	6.94297	3.81431	7.108	4.86616
STK19P	0	0.100364	0.039066	0.023981	0.005259	0.009868	0.024327	0.131732		FRK	0.07608	0	0.144424	0.061038	0.080556	0.120379	0.393099	0.225602		PLN	0	0	1.21218	1.71786	5.29585	2.3111	1.21884	2.25714		HLA-DRB1	1.42021	4.6165	2.63899	1.55111	8.4364	3.69711	8.68453	7.42598		HS3ST5	3.6779	4.53003	3.47005	0.233297	0.226345	1.29018	4.47244	3.28662
ESR1	0	0	0.067694	0	0.020268	0.037771	0.186238	0		HLA-DRB1	1.52297	4.07111	1.73325	2.27965	4.49128	3.49524	10.2084	7.5828		RPS6KA2	7.41094	9.69933	5.67701	0.845702	2.21851	6.32057	9.47654	10.2861		HS3ST5	11.6545	11.2435	3.63485	0.054074	0.203812	4.20032	4.3487	2.96926		HTR1B	0.913865	0	0.563105	0	0.108319	1.07925	1.58811	0.371887
F13A1	0.068311	3.29363	2.08362	0.14408	0.101759	0.471083	2.5171	0.683353		HS3ST5	12.3428	10.5229	6.02101	0	0.589843	2.6703	5.62513	2.08477		CADPS2	0.256634	0.648199	3.85009	0.388989	3.2745	6.31064	7.32246	7.26441		HTR1B	1.65768	1.15694	0.646956	0	0.181012	0.885305	2.33743	0.786373		KIAA1586	2.69239	4.19055	3.71704	1.77085	1.91338	1.98008	5.38742	2.04914
FRK	0.012741	0.060863	0	0	0.057813	0.25266	0.631452	0		HTR1B	1.98835	2.51022	1.25186	0	0.209543	1.35159	2.03362	0.732306		CNTNAP2	2.04599	5.3475	4.43264	0.334128	2.06463	3.80642	10.355	7.88076		KIAA1586	7.69052	5.08448	1.91874	1.36407	1.34438	1.65995	3.68673	2.14809		LRRC15	0	0	0	0	0.023982	0	0	0
GRIK2	18.8765	6.17756	4.38084	0.277607	0.390808	1.42588	3.32108	2.54277		KIAA1586	8.05052	4.50863	2.29924	1.56696	1.86614	1.34251	4.94079	2.17335		CTTNBP2	11.5146	8.33407	2.33019	0.495913	1.06567	2.6928	4.97115	4.20776		LRRC15	0	0	0	0	0	0	0	0		OPRM1	0.032786	0.025838	0.312145	0.050878	0.044812	0.162691	0.633178	0.248248
HLA-DRB1	0.902935	5.17636	3.6254	1.10713	7.70267	4.92235	7.02654	4.59997		LRRC15	0	0.027357	0.058434	0	0	0	0	0		EN2	0	0.046766	0	0	0	0	0	0.219672		OPRM1	0.016373	0	0.357564	0.023469	0	0.165202	0.660974	0.179957		PARK2	1.2748	0.356258	3.60661	0.065036	0.557384	1.90123	4.77324	2.05481
HS3ST5	10.6659	15.9608	4.56775	0.183053	0.267096	2.83837	5.55586	2.31353		OPRM1	0.036459	0.041534	0.34667	0.053574	0.047544	0.230424	0.911367	0.236593		FOXP2	1.24827	0.783268	0.928861	0.015689	0.334864	1.02928	1.4728	0.577536		PARK2	1.1305	0.920619	3.37646	0.14717	0.278298	2.94848	4.89383	1.95082		PLN	0	0.091926	1.40581	2.86759	0.840658	7.45138	1.23613	0.2388
HTR1B	1.37051	1.51209	0.79453	0	0.257105	1.77684	1.90731	0.897423		PARK2	1.46957	0.699583	5.56764	0.170209	0.493656	3.79932	5.21802	2.40956		GRM8	0.738226	0.419823	2.43755	0.113257	0.57933	1.70186	2.59151	1.53276		PLN	0	0.312209	3.293	2.09594	2.51774	1.26641	2.52728	1.45754		RPS6KA2	12.1348	2.19113	7.7653	0.28768	1.10556	4.51436	7.69353	11.59
KIAA1586	6.8231	6.26256	2.28421	1.40325	1.04004	1.44511	3.65198	2.20372		PLN	0.189493	0.307202	0	3.07256	1.15633	0.604935	4.70267	0.594174		HOXA1	0	0	0	0	0	0	0	0		RPS6KA2	7.74406	4.25472	7.03811	0.222381	0.488342	6.26523	7.71119	11.7127		CADPS2	0.734519	1.20781	8.72771	0.466373	1.21325	7.38201	15.6842	4.62436
LRRC15	0	0	0	0	0	0	0	0		RPS6KA2	11.3578	6.96839	9.55697	0.521028	0.787849	4.9419	9.05744	8.38928		IMMP2L	2.58992	2.40699	1.42934	0.846304	2.05655	2.05902	1.91818	1.82218		CADPS2	0.243949	0.27081	4.14191	0.265995	1.07315	7.56344	10.3549	4.79577		CNTNAP2	2.85645	0.486604	6.41535	0.349066	0.188386	1.56431	10.2323	3.9626
OPRM1	0.005595	0.053784	0.357465	0.049813	0.007797	0.1152	0.655612	0.382873		CADPS2	0.333675	0.469855	8.54747	0.561938	2.65199	8.33658	15.4239	5.54091		LAMB1	8.25121	7.09095	3.54966	1.10163	1.33662	2.72511	2.49598	3.10428		CNTNAP2	7.99047	2.9844	7.62269	0.115786	0.646513	4.27248	16.7747	7.32466		CTTNBP2	8.64709	4.38764	3.94474	0.159003	0.290516	1.15246	4.0013	4.12854
PARK2	0.93247	0.931484	5.53579	0.184488	0.30036	3.30838	6.75743	2.05823		CNTNAP2	5.14687	3.82237	12.4751	0.347833	0.52534	4.55423	14.9684	5.81448		MET	0.126204	0.212977	0.634181	0	1.30161	0.525097	1.39975	1.51557		CTTNBP2	14.2653	5.36843	2.59872	0.278961	0.477774	2.77801	5.23621	4.18153		EN2	0	0	0	0	0	0	0.052553	0.103143
PLN	0	0.441804	2.38912	1.62223	0.955203	0.546156	1.12133	0.155062		CTTNBP2	15.0891	6.71879	4.8777	0.355741	0.583119	1.58965	4.91615	2.95012		PIK3CG	0.103929	0.252586	0.256799	0.05666	0.089651	0.163889	0.615464	0.216839		EN2	0	0	0	0	0	0	0.12429	0.135696		FOXP2	2.16977	0.415331	2.02275	0.039724	0.033676	0.622103	2.12672	0.537514
RPS6KA2	6.17875	8.85907	9.67993	0.154422	0.483759	5.51054	7.59584	8.71534		EN2	0	0	0	0	0	0	0.063058	0.09435		PON1	0.053723	0	0.04721	0.311785	0.118717	0.137139	0.057325	0.266783		FOXP2	2.08376	0.764838	1.3271	0	0.167688	1.56553	1.69601	0.434707		GRM8	0.786668	0.530307	3.08888	0.133886	0.266248	1.00266	3.199	1.36042
CADPS2	0.115092	0.718415	6.62156	0.385539	0.927716	10.7205	12.0366	2.13841		FOXP2	2.13919	1.19581	2.01087	0.071541	0.1479	1.69057	1.40771	0.460115		RELN	1.58686	7.89325	5.29784	0.209776	0.343449	1.30262	1.4775	2.43917		GRM8	0.393877	0.202862	2.28279	0.094419	0.527548	1.51852	3.53748	1.23504		HOXA1	0	0	0	0	0	0	0	0
CNTNAP2	4.85572	7.28017	11.6097	0.299432	0.299971	5.38025	16.3519	5.01345		GRM8	0.418077	0.246442	2.34039	0.230943	0.506034	2.12532	2.67237	1.32055		ST7	13.7902	13.9988	5.98715	3.35115	4.29493	3.83435	3.74007	3.8786		HOXA1	0	0	0	0	0	0	0	0		IMMP2L	1.64709	2.10544	2.20854	1.06674	1.90939	3.57964	1.69159	1.37639
CTTNBP2	12.3567	8.87648	3.48986	0.358182	0.25237	1.88903	5.25365	3.35591		HOXA1	0	0	0	0	0	0	0	0		TMEM195	0	0	0	0	0.066295	0.052743	0.040817	0.108695		IMMP2L	2.34913	3.34623	1.01963	0.662791	1.70013	2.8965	2.46648	1.52264		LAMB1	4.57029	3.81827	4.40904	1.0215	1.11615	1.16648	3.37766	1.90694
EN2	0	0	0	0	0	0	0	0		IMMP2L	1.98308	2.086	1.44086	1.13618	1.71484	2.64228	1.38629	1.80218		UBE2H	14.7476	13.2362	11.542	2.37909	4.52993	8.80159	13.6326	13.8681		LAMB1	4.9973	3.52252	2.68626	0.737749	0.774476	2.21577	5.67285	2.66577		MET	1.22679	1.12479	6.39834	0.25031	0.028795	2.70953	7.29108	1.7004
FOXP2	1.45965	1.47009	2.14889	0.02254	0.007239	1.49093	1.78627	0.106648		LAMB1	3.84147	4.42179	6.28188	1.46857	1.31578	2.44233	4.44629	2.89597		WNT2	0.106356	0.129437	0.136354	0	0.090918	0.701037	1.12338	1.16295		MET	0.208255	0.050538	1.18703	0.004831	0	1.82399	4.024	1.5686		PIK3CG	0.12102	0.097265	0.379722	0	0.063752	0.132706	0.384814	0.128544
GRM8	0.170256	0.393207	1.77375	0.092684	0.191647	1.52962	3.52824	1.00139		MET	0.169733	0.07546	1.89938	0	0.160901	2.22266	3.23278	1.22893		CYP11B1	0	0	0	0	0	0	0	0		PIK3CG	0.103772	0.281267	0.399811	0.050649	0.063922	0.219617	0.355422	0.234335		PON1	0.123709	0.077707	0.037655	0.328827	0.100546	0.212022	0.048319	0.15843
HOXA1	0	0	0	0	0	0	0	0		PIK3CG	0.162436	0.243331	0.74477	0.111378	0.055498	0.120004	0.821396	0.103267		DLGAP2	0.501536	0.938801	1.09484	0.03735	0.658993	1.44628	3.06829	2.23135		PON1	0.05352	0	0	0.522914	0.392053	0.167211	0	0.083746		RELN	2.84362	2.27636	5.60832	0.380237	0.207599	0.932895	1.24137	1.19153
IMMP2L	2.04938	1.8739	2.66519	0.82061	0.923569	2.59806	2.47907	1.44168		PON1	0.012392	0	0	0.238613	0.086447	0.082834	0.046305	0.15861		FABP5	2.5717	8.14351	1.41292	3.04149	5.43907	0.87926	2.44716	0.653156		RELN	2.4284	2.71256	4.07051	0.097254	0.143003	0.851213	1.73031	3.61004		ST7	11.4802	15.5854	4.59023	2.11071	3.57308	3.72891	4.21135	3.7547
LAMB1	5.5139	5.99591	4.5903	1.26367	0.742716	3.02979	5.24891	2.4826		RELN	3.69028	7.70864	8.92515	0.265093	0.457122	0.79132	1.80624	3.2806		MCPH1	5.01438	6.16337	2.41018	0.569625	1.11995	2.31897	3.23913	2.72893		ST7	11.1225	16.3463	5.75553	1.93333	5.51129	3.69215	3.06971	3.61784		TMEM195	0	0	0.002764	0	0.109433	0	0	0.138772
MET	0.154439	0.136851	1.34672	0.021609	0.0285	2.13282	4.13676	0.4845		ST7	9.92427	14.0469	3.82077	4.01387	2.76125	3.69281	4.09929	4.2435		SDC2	2.384	6.42807	5.82046	15.5905	7.41813	6.06329	13.5815	15.8883		TMEM195	0	0	0	0.033708	0	0.139889	0.164964	0.150086		UBE2H	13.7337	5.6456	16.9589	0.661028	1.81619	5.10164	13.2433	11.2002
PIK3CG	0.097071	0.38926	0.279314	0	0.026039	0.300245	0.584792	0.135208		TMEM195	0	0.031975	0.068297	0	0.040669	0.006867	0.084197	0.141738		ASS1	6.90055	12.2599	8.1777	1.51519	15.6221	19.6687	11.5271	14.0242		UBE2H	18.6712	7.44545	11.7574	1.07315	1.03236	8.92083	18.052	15.9001		WNT2	0.179933	0.191429	0.365148	0	0.506058	0.662147	1.95904	0.442298
PON1	0	0.077501	0.19511	0.087431	0.038611	0.143906	0	0.62902		UBE2H	18.6891	10.7257	18.4268	2.20443	3.23139	7.53114	15.326	11.8364		ASTN2	5.62516	7.83365	6.3709	1.2981	3.335	4.85078	5.90405	6.67843		WNT2	0.103808	0.278591	0.174559	0	0.475198	1.90504	1.45659	0.541929		CYP11B1	0	0	0	0	0	0.001241	0	0
RELN	4.01197	10.0656	7.41706	0.17044	0.101002	0.87817	1.32868	2.93358		WNT2	0.150087	0.133357	0.282277	0	0.168086	1.4011	2.67432	0.794622		DAPK1	10.7041	16.0161	5.23512	0.382748	1.15317	4.89931	5.22257	6.31929		CYP11B1	0	0	0	0	0	0	0	0		DLGAP2	1.26091	0.143183	2.03555	0.066454	0.074227	1.09172	3.70884	1.22276
ST7	9.24525	14.9826	3.90645	2.40488	3.0978	4.82232	3.02896	3.35615		CYP11B1	0	0	0	0	0	0	0	0		TSC1	6.16886	4.07683	1.81671	0.347707	1.05025	2.21411	4.92437	4.11891		DLGAP2	0.82645	0.150354	2.41106	0.018733	0.083012	1.47495	5.30875	2.17512		FABP5	2.8242	6.74595	1.50998	0.985413	1.68194	1.18449	0.46929	1.45961
TMEM195	0	0	0	0	0.167592	0	0	0.099528		DLGAP2	1.41533	0.42684	5.07515	0.123865	0.366436	2.09746	5.22373	1.3584		CTNNA3	0.083946	0.051024	0.037263	0.122211	0.416844	1.85884	1.7979	2.92203		FABP5	4.92271	7.35719	2.89733	2.68866	2.95543	0.506085	1.95259	0.869164		MCPH1	4.25436	3.84817	3.61687	0.288424	0.63668	1.90038	3.3044	2.61675
UBE2H	15.0664	14.4483	11.7186	1.83542	1.37021	6.06701	16.9106	13.1823		FABP5	3.36707	8.44906	2.00482	1.75995	0.743843	0.648136	1.7514	0.653078		EGR2	0.113134	0.857952	1.61068	0.235696	1.19037	1.7999	2.7347	1.54331		MCPH1	6.27861	5.3974	2.6793	0.233509	0.841463	2.6966	4.33035	2.61235		SDC2	3.37302	4.99312	8.59622	11.3067	8.45287	14.5335	9.80745	17.9224
WNT2	0.07785	0.353355	0.285836	0	0.129841	1.74693	3.29358	0.499236		MCPH1	5.46667	5.2783	3.19214	0.535106	0.909595	2.34858	3.66489	2.92121		HTR7	2.79146	4.64544	1.12907	0.071777	0.107126	0.792538	1.4545	0.266912		SDC2	3.44564	2.52721	6.64268	7.00712	7.57083	9.61388	8.85438	16.6902		ASTN2	5.15337	3.31119	5.23322	0.964425	2.04087	3.7813	6.15091	6.93079
CYP11B1	0.045409	0	0	0	0	0	0	0		SDC2	1.71261	4.12821	11.7576	16.9095	6.3577	9.63252	11.9421	16.2178		JMJD1C	10.9259	6.57852	1.68826	0.890612	1.01647	2.0799	4.69316	3.62253		ASS1	3.06209	8.97959	4.80655	2.45358	15.4854	16.139	8.89196	13.3106		SLC1A1	10.2755	8.65911	13.9794	0.623826	1.02995	5.77929	12.978	5.97015
DLGAP2	1.01787	0.667334	5.68964	0.094267	0.070581	2.79108	6.14624	1.50972		ASTN2	4.47964	5.86929	8.19648	1.29228	1.78402	6.16307	6.9745	6.20855		KCNMA1	1.66202	1.82794	2.81344	1.23552	2.47353	3.74915	7.67269	5.163		ASTN2	5.96279	6.17188	6.79096	0.715306	3.4774	6.56091	7.31367	6.96257		TSC1	5.92814	1.20734	3.19337	0.179876	0.176415	0.856143	4.86885	3.38219
FABP5	3.73691	5.45162	1.7932	3.70484	1.84583	0.564241	0.520381	1.86504		DAPK1	15.1735	13.0808	8.31187	0.649221	0.907351	4.44317	6.81407	5.74242		LZTS2	6.51965	11.1995	7.28771	3.44207	12.506	9.23017	11.465	17.9803		DAPK1	14.5053	9.48878	5.57791	0.062875	0.889519	3.61623	6.56148	6.00327		CTNNA3	0.02408	0	0.180617	0	0.14409	1.3592	0.980974	4.10071
MCPH1	4.47652	6.70928	3.09623	0.288004	0.513258	2.37313	2.90507	2.54578		TSC1	9.2233	2.24334	5.51221	0.348251	0.663962	1.74072	6.04848	3.38346		PTEN	14.1141	12.6236	10.6758	1.9481	3.07599	8.13819	14.1746	9.24607		SLC1A1	13.7718	15.1954	9.75028	0.303792	1.62002	7.65376	11.2241	7.00007		EGR2	0	0.791956	3.44379	0.194702	0.579198	1.66579	5.61137	1.82011
ASTN2	5.71832	6.47391	10.118	0.552898	1.56321	6.15172	7.82342	6.34477		CTNNA3	0.084005	0.017602	0.14836	0	0.140985	1.09735	1.42025	2.30538		REEP3	1.22151	1.80781	1.11509	2.1934	3.92221	5.62022	10.5027	6.75193		TSC1	7.86789	1.23443	2.27717	0.170789	0.294275	2.10275	5.88214	4.13284		HTR7	6.4582	3.11874	1.04262	0	0.170554	0.300709	0.816991	0.447287
DAPK1	16.1538	14.5062	8.10464	0.227453	0.387042	5.16567	7.51439	6.30576		EGR2	0.075732	0.699478	6.56581	0.738136	0.977425	2.99217	4.27492	1.54851		CD44	0.229815	0.468966	0.317289	0.284688	0.872145	0.412851	0.395623	0.454995		CTNNA3	0.104325	0.036276	0.069123	0.061019	0	4.65049	1.59353	4.47503		JMJD1C	7.88835	3.64675	3.61988	0.738028	0.482317	1.32894	4.38438	3.38015
TSC1	8.49361	4.39924	4.80113	0.159084	0.184594	2.16788	5.50681	3.68253		HTR7	2.62561	2.47003	1.31535	0	0.278654	0.486034	0.640478	0.334262		HTR3A	0.03658	0.324843	0.477629	0	0.126364	0.101567	0.0262	0.057617		EGR2	0.151292	1.65125	5.30617	0.195702	1.31986	3.16418	4.64935	1.72319		KCNMA1	2.29861	0.879952	4.54285	0.792564	1.45331	3.63183	8.88801	4.50255
CTNNA3	0	0.045797	0.220255	0	0.182649	0.809017	1.52669	1.36236		JMJD1C	13.7982	3.7942	4.16787	0.895077	0.628582	1.67656	4.97479	3.01993		SHANK2	3.8051	5.24817	5.05315	0.228695	0.986442	3.76503	6.38452	4.46635		HTR7	1.63822	1.7963	1.05299	0	0.13755	0.363613	0.704807	0.325185		PTEN	8.6235	6.70049	19.8204	2.23771	1.33786	13.2649	16.4736	7.40361
EGR2	0	1.37943	5.71944	0.132835	0.356056	2.65826	5.70859	1.71182		KCNMA1	2.57804	0.859664	7.28243	1.22241	1.04965	3.51964	8.9775	3.64607		TH	0	0.260091	0.508976	0.138434	0.781509	0.261708	0.498259	0.469674		JMJD1C	11.7664	3.48156	1.76472	0.648583	0.151289	2.26168	4.85987	3.45332		REEP3	0.318036	0.585283	2.48107	2.23204	2.59143	6.72382	8.49755	10.489
HTR7	1.7592	1.60201	0.98995	0	0.163671	0.763208	0.569512	0.630605		PTEN	14.8707	10.036	19.9529	3.08178	3.07767	9.13503	15.8532	6.66847		AVPR1A	0.87034	1.43899	0.229496	0	0.052894	0.126682	0.238469	0.278284		KCNMA1	1.68353	0.528738	3.52243	0.976506	1.74158	3.41514	8.3749	4.47895		CD44	0.052314	0.327158	0.745564	0.192048	0.123887	0.28692	0.340884	0.656405
JMJD1C	8.93683	5.81912	2.7012	0.624743	0.345037	1.94233	5.04084	3.07638		REEP3	2.4419	1.06154	2.47092	3.26489	1.92497	4.84151	8.81521	7.719		CACNA1C	1.38636	1.99095	1.10344	0.095791	0.494809	1.26455	1.37413	1.71867		PTEN	13.4143	9.49305	13.4779	1.55923	1.13588	9.0586	14.1377	7.25938		HTR3A	0.128372	0.343186	0.387654	0	0.215911	0	0.049342	0.027431
KCNMA1	1.83792	1.29891	6.37807	1.14142	0.925186	4.2882	9.43684	3.90016		CD44	0.146751	0.332558	0.521278	0.370268	0.217392	0.267902	0.218867	0.562902		CCDC64	8.53094	4.55982	7.45923	0.713075	2.60236	3.96746	5.92341	4.65715		REEP3	2.85888	0.318818	1.1423	1.83354	1.08202	13.6278	6.54025	9.58547		SHANK2	9.7265	1.29114	10.2733	0.127441	0.234548	2.86968	6.01564	3.23203
PTEN	9.64044	15.418	13.2852	1.07615	1.42854	9.79378	14.9264	7.7818		HTR3A	0.271703	0.462855	0.336404	0.059743	0.158229	0.066446	0.136449	0.149694		DDX11	0.693838	0.164425	0.5026	0.102615	0.064486	0.045752	0.081981	0.084452		CD44	0.42297	0.267345	0.3487	0.261215	0.403003	0.453265	0.317392	0.647542		TH	0.041289	0.029058	0.371031	0.061577	0.201655	0.28927	0.412386	0.667031
REEP3	2.85583	2.03448	2.52109	2.02016	2.63452	2.50818	7.76043	5.40645		SHANK2	7.35231	3.08615	16.4894	0.213285	0.357577	3.91621	8.55035	3.41814		ITGB7	0.03238	0.044136	0.021345	0	0.302927	0.113402	0.346203	0.456334		HTR3A	0.226641	0.138696	0.695778	0.036142	0.110452	0.137148	0.075636	0.321657		AVPR1A	0.639015	0.162869	0.518993	0.078344	0.094165	0.223451	0.251301	0.193796
CD44	0.075216	0.557579	0.508477	0.344201	0.297433	0.186645	0.156767	0.78042		TH	0.035765	0.090138	0.625505	0.167445	0.113607	0.505937	0.386619	0.543153		TPH2	0	0	0	0	0.09032	0.19184	0.565472	0.108462		SHANK2	6.15036	1.79638	10.7879	0.052636	0.259401	2.92275	8.98401	3.88902		CACNA1C	5.09915	1.11078	1.42482	0.021762	0.063251	0.688448	1.65334	1.12307
HTR3A	0.162854	0.419843	0	0	0.135078	0.213625	0.124963	0.095178		AVPR1A	1.32458	0.871271	1.37995	0	0	0.26753	0.31143	0.170225		DIAPH3	1.63887	0.973596	0.378438	0.252532	0.144257	0.175615	0.311998	0.076202		TH	0	0.062626	0.898516	0.012365	0.652463	0.425442	0.462931	0.560166		CCDC64	13.2465	4.29161	8.75101	0.402825	1.32752	1.91628	5.84492	4.58596
SHANK2	8.9334	4.86546	14.9372	0.099144	0.115683	4.1584	10.5595	5.12592		CACNA1C	2.97921	1.49011	2.85473	0.049595	0.249444	1.19169	1.93973	1.35597		FLT1	1.87137	1.50597	1.44393	0.757969	1.1742	1.46695	4.72245	5.16545		AVPR1A	0.909118	0.798953	0.876231	0	0	0.207973	0.278429	0.252342		DDX11	1.22698	0.053599	0.442673	0	0.010458	0.074329	0.08371	0.077774
TH	0	0	0.594027	0.073251	0.351925	0.29446	0.481782	0.875985		CCDC64	10.8482	2.99662	11.2147	1.32122	1.89734	1.97903	7.56788	5.11955		HTR2A	0.57652	1.28711	3.41498	0.723353	4.5439	9.74755	15.6569	9.10225		CACNA1C	2.95976	1.09373	2.18128	0.02495	0.062954	1.13592	2.3423	1.5081		ITGB7	0.101343	0.001042	0.050099	0.068293	0.175108	0.023405	0.086204	0.292469
AVPR1A	0.939694	2.06995	1.10947	0	0	0.289092	0.154811	0.119527		DDX11	0.999292	0.072573	0.404732	0.169771	0.048049	0.092055	0.1097	0.107645		MYO16	14.6754	16.9146	9.66551	0.242696	0.494822	2.29569	2.71274	1.64225		CCDC64	8.37788	2.61443	6.12921	0.621403	1.62282	2.59203	9.57342	4.834		TPH2	0	0	0.123146	0	0.000696	0.094995	0.507839	0
CACNA1C	3.78577	1.99045	3.32844	0.05183	0.078531	1.47071	2.2893	1.38964		ITGB7	0.136878	0.024901	0.08961	0	0.145965	0.166003	0.249022	0.352027		NBEA	16.2105	15.1511	6.6915	0.72871	1.59971	4.56194	7.98565	6.73692		DDX11	0.738145	0.168225	0.460662	0.025734	0.064663	0.10868	0.090783	0.137005		DIAPH3	0.01775	0.096589	0.186823	0.079417	0.169981	0.122377	0.134518	0.088632
CCDC64	14.4214	3.02682	8.02936	0.456768	1.24824	2.76639	9.25929	8.52658		TPH2	0	0	0.248415	0	0.111068	0.224774	0.551574	0.15491		ESR2	0.132199	0.053265	0.057681	0	0.057277	0.02263	0.035026	0		ITGB7	0.002258	0	0.078653	0.069431	0.437747	0.091286	0.129866	0.548078		FLT1	1.08442	0.719664	2.06904	0.425981	0.241597	2.28162	3.84766	4.81988
DDX11	1.20795	0.13581	0.503735	0	0.01265	0.085256	0.111421	0.104593		DIAPH3	0.295667	0.114336	0.246063	0.213372	0.071281	0.026482	0.084266	0.102412		ESRRB	0.159568	0.081283	0	0	0	0.022814	0.035311	0.032401		TPH2	0.035007	0	0.113786	0	0.383779	0.181454	0.506842	0.109553		MYO16	18.5695	10.2504	10.1787	0.299621	0.373787	1.51039	2.43797	1.44897
ITGB7	0.047402	0.076465	0.128792	0.095085	0.143429	0.08067	0	0.274654		FLT1	2.11931	1.20506	2.49098	1.05462	0.305841	2.44426	4.60828	5.06584		FBXO33	2.37929	2.69343	2.6114	0.452106	2.34893	4.24335	7.7327	6.76536		DIAPH3	0.299947	0.093229	0.050264	0.217016	0.056254	0.056635	0.084332	0.117727		NBEA	17.5093	5.72175	10.0751	0.807712	0.26504	3.16232	8.53874	3.98342
TPH2	0	0	0.093161	0	0.051201	0.260137	0.118418	0.08278		ESR2	0.148093	0.066154	0.236038	0	0.034899	0	0.081077	0.012363		LRFN5	19.6549	16.3441	16.0983	1.15675	3.97306	13.0759	13.7617	11.1063		FLT1	2.10462	0.678602	2.1898	0.237158	0.169285	2.04765	5.43464	4.84159		ESR2	0.111546	0.030398	0.032019	0	0.048437	0.048589	0.211135	0.024283
DIAPH3	0.211143	0.256548	0.287517	0.151572	0.058042	0.047058	0.115759	0.237977		ESRRB	0.079201	0.03183	0	0	0	0.025512	0	0.009095		MDGA2	2.65185	2.2702	1.33962	0.32153	0.714084	0.810647	2.45377	1.10873		MYO16	18.8413	13.5689	9.75	0.122393	0.742228	1.53612	2.91835	1.35982		ESRRB	0.300576	0.110906	0.22237	0	0.007972	0	0.061169	0.050302
FLT1	1.12508	1.9831	1.68095	0.284045	0.099171	1.97035	4.48849	4.47434		FBXO33	3.24045	3.16823	5.10313	0.517093	0.919863	4.85423	10.4731	6.27459		ATP10A	0.350223	0.670693	1.32007	1.26995	1.12328	0.89812	1.61574	2.27318		ESR2	0.099	0.08716	0.107749	0	0	0.045731	0.214281	0.078334		FBXO33	2.72016	1.52794	3.85967	0.335168	0.540888	3.83589	10.3358	5.4735
NBEA	14.9616	16.4963	12.002	0.689333	0.319619	5.92503	8.66171	3.80393		LRFN5	15.9505	18.8042	18.5698	2.20489	5.04121	12.0588	16.3598	10.1814		NDNL2	10.2062	19.7939	13.2699	5.47991	13.2	16.4931	14.4319	13.4462		ESRRB	0.113806	0.146053	0.110114	0	0	0.025085	0	0.07577		LRFN5	15.4029	13.7677	14.03	0.889133	2.31429	9.85791	19.0872	9.8169
ESR2	0.146795	0.053457	0.089427	0	0.048157	0.045177	0.107589	0		MDGA2	4.21218	1.62595	3.31069	0.125321	0.294132	0.89558	2.89502	0.832073		NTRK3	4.56196	5.37932	3.09617	0.838909	1.47976	4.12574	5.87435	6.35459		FBXO33	3.15828	2.83452	4.6787	0.235865	1.3644	5.28952	8.13442	5.25704		MDGA2	3.83563	0.832501	2.4041	0.19593	0.334352	0.697108	2.65346	1.10534
ESRRB	0.088263	0.027129	0	0	0	0.022772	0.113048	0.057795		VASH1	19.5436	17.8201	13.6028	2.12201	1.13563	3.11875	5.52257	5.43688		ANKRD11	10.5638	9.39138	13.0378	1.97849	2.93159	9.69418	10.9105	14.2415		MDGA2	3.03225	1.19751	1.82151	0.147719	0	1.14235	2.37351	1.0171		ATP10A	0.722866	0.550148	1.50843	0.585247	0.666099	0.915616	1.63089	2.13051
FBXO33	2.45387	3.18159	3.79548	0.215028	0.291346	5.09732	8.77074	3.66484		ATP10A	0.365299	0.561223	1.78876	1.52437	0.639412	1.21016	1.97559	2.62249		CACNA1H	4.49292	9.87948	1.94429	0.079027	0.55509	2.02553	2.25919	2.29761		ATP10A	0.290839	0.488337	1.9324	0.872068	1.55757	1.38136	2.3753	2.08058		NDNL2	10.8579	19.2413	13.2899	2.9513	11.5454	16.4436	14.1072	11.8897
LRFN5	13.9406	19.8659	13.7203	0.764581	2.56395	15.1938	14.0432	5.80662		NTRK3	5.31061	3.47932	7.82518	0.83882	0.808707	3.40265	6.56418	4.77815		GRIN2A	0.755097	1.29381	9.29375	0.492333	4.44755	10.0682	19.7895	10.7849		NTRK3	4.107	2.84567	4.59841	0.528445	1.3566	3.27719	7.34749	6.05418		NTRK3	4.64146	2.11877	3.35121	0.774003	0.778404	2.86817	5.71103	4.90183
MDGA2	1.92328	1.97409	3.24991	0.16801	0.184224	1.1241	2.3943	0.986894		CACNA1H	5.45099	8.17768	2.38827	0.268104	0.289683	1.94804	2.85712	2.04575		TSC2	8.60159	15.1562	5.92117	1.3189	4.15716	5.75503	6.76963	8.50436		ANKRD11	14.06	4.35631	11.1383	1.23822	1.34742	6.89334	14.9436	13.0804		ANKRD11	13.5931	5.33737	13.6189	0.842253	1.70725	3.48242	8.06949	11.3838
ATP10A	0.315376	0.511969	1.72629	0.921836	0.621167	1.0677	1.96128	3.91297		TSC2	10.1031	14.8613	7.29101	2.0848	2.17529	7.426	8.13665	8.54285		BZRAP1	4.54442	4.93754	14.3598	2.07277	5.19738	9.75931	18.6377	14.3689		CACNA1H	4.93108	5.04288	2.92236	0.055492	0.915763	1.51693	3.8823	2.35289		CACNA1H	13.0417	6.89121	1.24083	0.052443	0.510709	1.01177	1.9575	2.04439
NTRK3	4.94182	4.36399	7.71907	0.624704	0.514732	5.0065	8.72702	4.94858		CACNA1G	3.27013	2.50947	10.2771	0.526456	1.00395	4.50995	6.03597	3.62396		CACNA1G	1.60148	1.72855	4.78827	0.283346	1.48297	3.42074	3.32238	3.81378		TSC2	12.1211	12.9081	7.49661	0.899202	3.17344	5.70039	9.48749	7.99208		BZRAP1	8.57764	3.17276	16.969	0.450557	5.81785	5.60326	15.0216	15.7012
CACNA1H	7.96534	7.28406	2.99081	0.063282	0.406544	2.09161	3.52878	2.44254		HOXB1	0	0	0	0	0	0	0	0		HOXB1	0	0	0	0	0	0	0	0		CACNA1G	1.99601	1.4343	6.89315	0.198859	1.51177	3.55943	6.31459	3.94409		CACNA1G	10.6343	4.73521	5.18845	0.179713	0.695266	2.16997	4.73367	3.1589
TSC2	14.2473	14.5617	7.74559	1.36987	2.26437	7.67947	9.49111	8.81959		ITGB3	0.384977	0.118601	0.183661	0	0.025027	0.018148	0.145157	0.086504		ITGB3	0.151878	0.202237	0.143625	0.045744	0.132381	0.032679	0.075698	0.126012		HOXB1	0	0	0	0	0	0	0	0		HOXB1	0	0.051309	0	0	0	0	0	0
CACNA1G	4.48148	2.38326	8.88262	0.181188	0.888347	5.18874	7.80715	2.7561		NF1	6.29537	2.5752	5.90446	0.291793	0.378299	3.407	7.20125	3.88531		NF1	3.73031	4.62561	1.98009	0.267498	1.15681	3.55726	6.88741	5.66622		ITGB3	0.078384	0.083058	0.156655	0	0	0.076681	0.153665	0.108302		ITGB3	0.413041	0.072144	0.125012	0	0	0	0.108191	0.07037
HOXB1	0	0	0	0	0	0	0	0		NOS2	0.327315	0.227604	2.10399	0.343165	0.402472	0.911749	1.49562	0.937534		NOS2	0.281902	0.555463	1.27056	0.063477	0.464257	0.643202	0.823876	1.20996		NF1	5.19296	1.81115	3.52174	0.137371	0.220362	3.8429	6.21177	4.95363		NF1	3.06802	0.946964	3.91079	0.34121	0.16117	2.10647	6.77523	4.81755
ITGB3	0.244056	0.188286	0.192389	0	0.034769	0.059103	0.080415	0.183744		PER1	3.37479	7.92415	10.6158	2.59511	1.57011	8.60698	6.06813	6.0785		PER1	3.2103	6.79284	6.41596	1.5797	3.38243	6.75766	4.05954	6.23257		NOS2	0.435749	0.284232	1.78902	0.082865	0.602466	0.648316	2.01223	1.13013		NOS2	0.427667	0.389101	1.23006	0.152393	0.407573	0.647197	1.27429	0.868584
NF1	3.6373	4.48331	4.74887	0.153056	0.22168	3.71583	6.76186	3.9985		RAI1	6.44928	6.91106	6.77445	0.436187	0.590413	4.90555	7.13226	6.52291		RAI1	4.60078	9.73193	4.41193	0.316585	1.93771	4.26332	5.40296	7.09666		PER1	4.17115	5.22647	11.4294	0.932393	3.53579	8.14798	6.55106	5.82713		PER1	8.67341	8.07334	7.44005	0.592129	1.34851	3.89269	5.8472	5.54582
NOS2	0.498502	0.455425	2.36246	0.133245	0.533826	0.990861	1.66025	0.384789		SLC6A4	0.094874	0.669425	0	0	0	0	0.032036	0		SLC6A4	0.017668	0.091619	0	0	0.003636	0.038661	0	0		RAI1	7.49052	4.82989	6.18835	0.124082	0.971624	4.08147	9.28678	6.64924		RAI1	12.6539	5.66997	4.14879	0.227428	0.613743	2.3499	6.53411	6.31128
PER1	5.03269	7.20387	10.998	1.17834	1.74622	10.4907	6.62811	6.44492		MBD1	8.00195	11.2083	10.2725	1.98334	2.42601	8.86377	10.5984	9.46665		MBD1	6.63722	11.5971	7.21692	0.716443	3.91434	7.29155	8.10916	8.36523		SLC6A4	0.034438	0.024482	0	0.008236	0	0	0	0.022003		SLC6A4	0.032948	0.088715	0.049635	0	0.020546	0	0	0
RAI1	8.99001	7.04757	6.81863	0.247329	0.552401	5.64165	9.11008	6.0254		DMPK	12.3754	13.6706	8.08025	2.91045	2.42648	4.00957	4.9869	6.61093		DMPK	10.3111	13.5681	7.97053	1.61553	6.39318	3.52772	4.22458	5.80856		MBD1	9.66155	9.28766	9.57328	0.861129	4.3004	7.63438	10.1371	10.3618		MBD1	15.0327	9.19338	7.38483	0.801802	2.52531	6.63972	8.64713	8.1085
SLC6A4	0	0.15842	0.07329	0	0.040855	0	0	0		ODF3L2	0.025168	0.011224	0.233355	0	0.020938	0.179435	0.081253	0.243473		ODF3L2	0	0.180123	0	0.12873	0	0.04567	0.141372	0.102931		DMPK	13.1969	9.92611	7.9916	1.32767	4.22357	2.48421	6.31101	7.47519		ODF3L2	0.350741	0.373183	0.11647	0	0.187609	0	0	0.155622
MBD1	11.1593	12.4708	10.5455	0.48337	2.28133	8.9684	11.0497	8.82398		ADA	0.515537	1.51487	1.31248	4.13836	1.95158	2.06483	1.71122	1.77823		ADA	0.448986	1.02045	1.19547	2.44963	2.97743	1.74592	2.11286	1.82554		ODF3L2	0.131988	0.233704	0.258586	0	0.23678	0.049537	0	0.207933		ADA	0.458073	1.47099	1.43625	2.08129	2.99638	0.954485	1.28425	2.03109
ODF3L2	0.441639	0.30117	0.238178	0.217093	0.23544	0.044969	0.159888	0.172361		CDH22	2.49965	6.01924	12.0511	1.07799	4.21495	15.7589	18.899	16.2342		CDH22	2.46006	4.96428	6.63197	0.26903	6.71091	11.6329	11.0924	15.4116		ADA	0.848027	1.18721	1.65746	2.28471	5.84845	2.16439	1.59577	1.74054		CDH22	3.30487	2.053	5.87035	0.119937	4.10552	11.2774	12.947	11.2437
ADA	0.734009	1.22106	2.7445	2.14736	2.60037	1.48742	2.19802	2.50229		MACROD2	5.7717	2.38444	4.22624	0.199427	0.345718	0.937444	2.29542	1.40876		MACROD2	3.46327	3.01282	2.90663	0.287856	0.393383	1.31221	2.28866	1.72112		MACROD2	4.36952	1.85767	1.4404	0.273921	0.546041	1.07509	1.77645	0.856677		MACROD2	3.10784	1.26438	3.16097	0.225388	0.141631	0.624466	2.21916	1.17798
MACROD2	4.49746	3.22385	4.29049	0.587504	0.32228	1.42845	3.05157	1.66839		ADORA2A	3.09659	5.96045	3.18925	2.15575	1.38993	2.05934	2.21752	2.37085		ADORA2A	2.33009	7.12419	2.22574	1.54676	2.76814	1.18459	1.99075	1.61723		CBS	15.7978	17.0714	10.3767	1.48926	3.11092	4.41424	6.64825	12.1693		ADORA2A	8.55013	4.86163	2.93481	0.769657	5.69681	3.23338	1.76296	2.53282
ADORA2A	4.99823	6.48286	2.62582	1.19004	1.67962	2.32344	2.66207	2.72219		ADSL	9.67263	14.7337	8.53604	7.07711	8.58331	8.2186	9.36635	5.3148		ADSL	11.2816	15.7654	9.23156	4.59124	10.5729	7.74999	8.04791	5.82549		ADORA2A	2.84097	5.13849	4.08399	0.99686	2.35162	2.03803	3.05511	1.89175		ADSL	11.2599	12.3975	9.42056	5.65666	10.9793	7.2828	9.91905	6.19327
ADSL	9.10841	14.765	7.77577	5.22207	9.62402	9.6535	8.12347	4.61845		AGTR2	0	0	0	0	0	0	0	0		AGTR2	0	0	0	0	0	0	0	0.041125		ADSL	11.3607	18.4074	6.742	4.39499	12.5568	7.84284	8.07112	5.47797		SHANK3	7.16938	3.59411	19.2022	0.503187	4.6906	10.9762	17.6919	19.0025
AGTR2	0	0	0	0	0	0	0	0		AR	0.019369	0.034353	0.264053	0.032881	0.04399	0.174793	0.565114	0.1126		AR	0.020688	0.06714	0.18404	0.057587	0.088786	0.283517	0.344849	0.261288		AGTR2	0	0	0	0	0	0	0	0		AGTR2	0	0	0	0	0	0	0	0
AR	0	0.049967	0.277995	0.067798	0.045216	0.39873	0.582236	0.254591		ARX	3.6747	8.90157	8.60065	0.9509	1.20889	5.17143	2.96187	4.43348		ARX	3.96216	11.1659	6.47294	0.515218	2.50885	3.07554	3.22022	4.14862		AR	0.035371	0	0.135817	0.020164	0	0.27554	0.737256	0.240223		AR	0.047962	0	0.242817	0.000483	0.059819	0.181051	0.365002	0.265751
ARX	12.643	10.5136	9.36958	0.225162	1.1996	4.21499	4.84809	6.93199		CACNA1F	0.036275	0	0.276346	0.130912	0.267383	0.361191	0.307855	0.192164		CACNA1F	0.00938	0	0.303981	0.090897	0.352388	0.301063	0.176381	0.272696		ARX	10.8514	8.24799	10.4495	0.232347	3.66899	3.36048	2.89626	4.77472		ARX	11.1367	11.3001	4.39275	0.176165	1.05993	2.57438	3.01003	3.57606
CACNA1F	0.013732	0.007586	0.317167	0.081976	0.424634	0.361242	0.380193	0.219991		CDKL5	5.79451	1.06651	14.1587	0.443921	0.489918	4.57536	11.4577	2.78714		CDKL5	2.21226	3.50296	2.84104	0.705952	1.2528	3.95743	9.36193	4.30363		CACNA1F	0.009345	0	0.212625	0.07969	0.779545	0.319355	0.276068	0.2641		CACNA1F	0.010874	0.007447	0.297311	0.029146	0.363565	0.330128	0.31066	0.282911
CDKL5	3.24523	3.67416	11.6822	0.66177	0.305764	5.83506	13.0755	2.7065		CXCR3	0	0.074603	0	0	0	0	0	0		CXCR3	0	0	0	0	0	0	0	0.034668		CDKL5	3.98475	0.487498	4.14525	0.367273	0.136312	4.49355	11.0035	3.679		CDKL5	2.12328	0.348249	6.23775	0.664868	0.119232	2.14385	9.45573	2.93034
CXCR3	0	0.036089	0	0	0.018891	0	0	0		DMD	1.41606	0.454134	1.6253	0.11708	0.147581	0.944632	1.57139	1.17782		DMD	0.998458	0.853611	0.616636	0.178996	0.279717	1.06642	1.62699	1.57757		CXCR3	0	0	0	0	0	0	0	0.066722		CXCR3	0	0.071825	0	0	0	0	0.040685	0.048178
DMD	0.953859	0.707157	1.31977	0.115286	0.105984	0.910561	1.42605	1.28392		FMR1	10.7992	5.30013	15.1617	1.60862	2.95242	8.49011	16.0313	11.3213		FMR1	9.20539	7.24134	10.7346	1.69701	2.4866	9.71824	14.1162	12.6345		DMD	1.20789	0.378856	0.749525	0.06725	0.03646	0.978454	1.94454	1.30303		DMD	0.80872	0.261721	1.19734	0.12692	0.063014	0.612359	1.38738	1.31084
FMR1	8.48228	6.95795	12.7177	0.87269	1.16415	9.45617	14.1904	12.2788		FRMPD4	10.2728	5.14761	16	0.296027	0.600342	5.59198	14.5492	5.38734		FRMPD4	5.27625	5.73599	5.71712	0.336014	1.7522	6.17581	10.6377	7.24766		FMR1	12.9485	4.31002	6.57735	0.976695	1.0907	9.01678	18.2137	11.7686		FMR1	7.1945	3.43998	14.0628	0.499263	1.20118	6.48002	13.4537	10.4743
FRMPD4	7.81494	6.38265	13.9269	0.36345	0.235003	7.47812	15.5132	4.38632		GRPR	0.298928	0.250549	0.947379	0.054382	0.053111	0.077025	0.485225	0.343634		GRPR	0.124213	0.243185	0.250166	0.194154	0.105743	0.167081	0.35945	0.315206		FRMPD4	7.03757	2.77387	7.47703	0.121194	0.326207	6.54314	13.4799	5.68268		FRMPD4	9.34355	2.27499	9.2509	0.255426	0.208604	3.21872	11.6699	4.59888
GRPR	0.295491	0.161602	0.885365	0	0	0.067824	0.664294	0.302114		IL1RAPL1	0.60901	0.191678	1.90573	0.177237	0.459133	0.707116	2.43971	1.56066		IL1RAPL1	0.381305	0.463151	0.824348	0.213051	0.633001	0.794531	1.99908	1.85569		GRPR	0.099534	0.130853	0.485291	0	0	0.092382	0.215437	0.27017		GRPR	0.453089	0.080406	0.44984	0	0	0.10942	0.096632	0.333592
IL1RAPL1	0.332967	0.088064	1.37135	0.089515	0.16029	0.630214	1.93375	1.19906		MAOA	2.22903	1.86791	7.88793	1.95518	2.02308	4.4857	4.73273	8.83059		MAOA	2.40898	3.76435	5.92605	2.97152	1.71845	4.39533	5.57634	10.3302		IL1RAPL1	0.464655	0.048025	0.585565	0.069548	0.505159	1.41487	1.94734	2.1307		IL1RAPL1	0.460101	0.092718	0.852392	0.343731	0.235024	0.320185	1.43093	1.86097
MAOA	1.94175	2.8202	8.73512	1.44267	0.989115	3.30116	4.16531	13.999		MECP2	7.48417	3.53303	11.91	2.03612	2.2224	4.20551	11.0558	6.40548		MECP2	4.3792	6.26104	4.23714	2.01368	4.86626	3.73017	9.26482	6.79962		MAOA	3.18836	2.52182	4.58801	1.23422	1.48962	4.64553	4.62563	9.17745		MAOA	1.5296	1.69966	6.07493	1.45689	1.34784	5.53977	3.46669	8.84996
MECP2	10.6096	5.21885	11.0928	0.705322	2.63791	4.62858	12.4005	6.89693		MED12	3.86607	4.16355	1.70244	0.24557	0.135457	1.05909	1.72032	2.46145		MED12	3.24271	5.25886	1.19855	0.246675	0.527453	1.22971	1.50335	2.45571		MECP2	9.25675	2.64344	6.92024	0.646483	4.17945	4.02872	10.471	7.86011		MECP2	6.4517	4.14559	6.98183	1.12997	1.95797	3.84563	6.28171	6.36511
MED12	4.68199	4.48288	1.73761	0.185586	0.162803	1.09933	2.16935	2.82281		NLGN4X	10.1074	7.87227	12.5514	0.295818	0.290172	3.42468	5.80709	3.84339		NLGN4X	4.78958	8.58327	3.75604	0.173578	1.46011	2.98322	5.0608	5.24463		MED12	4.89014	3.12712	1.19182	0.176256	0.239418	1.76369	1.79573	2.8196		MED12	6.94752	3.1766	1.12561	0.071051	0.235684	0.55839	1.44993	2.99942
NLGN4X	9.1075	12.5021	9.54304	0.151452	0.116368	4.34767	7.59015	4.46337		OPHN1	2.10891	0.992542	1.62025	0.340304	0.170981	0.733503	1.72336	1.85536		OPHN1	1.9154	2.21974	0.746042	0.147215	0.193667	0.849581	1.89314	2.20383		NLGN4X	9.12566	4.61822	5.47209	0.156284	0.084314	3.49446	6.35128	4.68895		NLGN4X	13.4705	3.02965	5.82544	0.316879	0.117498	1.65462	7.2859	4.93602
OPHN1	2.16541	2.01685	1.30698	0.18323	0.175164	0.718226	1.3284	2.70776		PCDH19	11.8303	8.87819	14.0465	0.45916	0.194868	5.00172	7.15893	2.66177		PCDH19	6.99114	15.6581	4.94011	0.547225	0.689348	3.49684	5.61752	3.65055		OPHN1	2.40066	0.930796	0.921977	0.117639	0	0.958015	1.43071	2.49629		OPHN1	1.50663	0.33816	1.5862	0.04051	0.06892	0.650838	1.98457	2.6477
PCDH19	12.8385	15.6803	16.6752	0.392233	0.121021	6.3048	8.84854	2.5415		PPP1R3F	5.04082	9.60859	15.7957	2.91826	8.20154	19.3353	19.0979	15.0282		PPP1R3F	4.488	9.47291	11.1708	1.66051	10.4966	14.7624	14.6814	17.0126		PCDH19	13.6531	6.27866	8.17008	0.226005	0.122048	3.55857	10.1471	3.52606		PPP1R3F	13.4389	9.13745	11.1569	1.44206	7.34096	16.6484	13.4384	14.4027
PTCHD1	2.01198	2.84078	2.1387	0.336169	0.149735	1.02466	2.24435	0.759157		PTCHD1	3.65972	1.55671	2.00756	0.069712	0.100085	0.992377	1.798	0.848805		PTCHD1	2.14675	2.17915	0.777388	0.289176	0.298167	0.55125	2.33501	0.852427		PTCHD1	2.03469	1.13082	1.59495	0.084345	0.158954	0.697843	2.14147	1.18425		PTCHD1	2.194	0.671728	1.43308	0.112202	0.124254	0.489234	2.06416	0.820315
RAB39B	13.5567	11.4586	15.0084	1.59736	3.03347	7.73553	13.921	5.55131		RAB39B	11.2135	8.36925	16.3908	1.53452	1.94245	7.5293	15.4541	5.8357		RAB39B	9.76274	11.9436	6.79293	1.98558	4.60009	7.21198	13.6922	6.33923		RAB39B	12.6889	8.87045	10.046	0.410212	6.74315	7.71722	17.0017	7.38427		RAB39B	10.939	4.81145	11.7659	0.902132	4.21342	4.5338	16.0998	5.40441
RHOXF1	1.20109	0.084077	0.271847	0.169191	0.541445	0.198368	0.303003	0.533684		RHOXF1	1.39512	0.462696	0.185619	0.608874	0.991776	0.05632	0.846088	0.627435		RHOXF1	0.997461	0.77737	0.523118	0.106473	0.694038	0.465872	0.36128	0.38092		RHOXF1	0.906932	0	0	0.198548	0	0.322525	0.518016	0.535787		RHOXF1	0.770292	0.301876	0.580465	0.24773	0.684598	0.160013	0.340714	0.628758
SH3KBP1	7.58957	5.2805	11.7446	0.40358	1.17267	5.73429	11.2665	6.2435		SH3KBP1	6.3155	5.99016	11.392	1.66894	1.6924	5.20574	11.1959	7.54509		SH3KBP1	6.81292	6.78855	7.91733	1.12398	2.42248	5.92738	10.0168	7.74827		SH3KBP1	7.95584	5.58808	6.46706	0.782436	1.08531	5.53773	11.0022	7.75433		SH3KBP1	9.72179	5.71642	9.49867	0.539284	1.60331	2.94787	9.02674	6.58311
SLC6A8	3.3307	5.15992	5.10825	0.659007	2.37777	8.13566	8.70073	11.4494		SLC6A8	3.0811	5.73719	6.36394	1.81794	2.72184	8.05958	9.17423	14.7363		SLC6A8	2.46376	5.36263	5.38563	1.19191	5.25384	9.00195	8.83143	14.6084		SLC6A8	3.99467	4.22889	7.56287	0.706732	3.12538	9.8227	7.77729	16.901		SLC6A8	6.05133	4.64069	5.81004	0.763571	3.49594	6.55722	9.27566	16.0255
WNK3	2.34456	3.03648	0.869415	0.067127	0.043576	0.302178	0.99813	0.396543		WNK3	3.97054	1.25678	1.04686	0.034284	0.045247	0.365563	0.89359	0.466585		WNK3	2.13323	2.67358	0.432906	0.081864	0.183513	0.330873	0.621502	0.629889		WNK3	3.08688	0.789882	0.452604	0.05185	0.077116	0.347174	0.523327	0.555781		WNK3	1.57833	0.330815	0.806529	0.109615	0.007691	0.165755	0.732911	0.482665
ASMT	0	0	0	0	0.044744	0	0	0.128533		ASMT	0.049602	0	0	0.020435	0	0.026762	0.060592	0		ASMT	0	0	0	0.03762	0	0.080079	0	0		ASMT	0.027932	0	0	0.048148	0.181476	0	0.099322	0.031431		ASMT	0	0	0	0	0.036199	0	0.010955	0.036543
NLGN4Y	0.124675	3.9554	3.36901	0	0.340834	0	3.26947	2.70023		NLGN4Y	0.042756	2.6304	3.79474	0	0.358812	0	3.74644	2.33689		NLGN4Y	0	3.488	1.42502	0	0.897889	0	3.54626	2.92621		NLGN4Y	0.063632	1.90094	1.86242	0	0.501003	0.015921	3.21367	3.02586		NLGN4Y	0.098388	1.08758	2.03609	0	0.290738	0	3.89572	2.64793
[truncated: 52 more columns]

## Sheet: Highly Expressed Genes
Supplementary Table S2b. List of 32 highly expressed ASD genes identified.
FABP7
GNAS
GPX1
HNRNPH2
HRAS
PDZD4
RPL10
SEZ6L2
TSPAN7
MAP2
PRKCB
MEF2C
RAPGEF4
APC
DCX
RIMS3
GABRB3
HSD11B1L
ROBO1
GLO1
HLA-A
DLX1
DLX2
CNR1
ADORA2A
PCDH10
NLGN3
RELN
CADM1
CADPS2
CDH22
DHCR7
