# Supplementary material for: Expression Profiling of Autism Candidate Genes during Human Brain Development Implicates Central Immune Signaling Pathways
Source: PLoS One. 2011 Sep 15;6(9):e24691. doi: 10.1371/journal.pone.0024691 (PMC3174192; doi:10.1371/journal.pone.0024691)
Supplement: Table S3 — Expression heat map of SZGene genes. (XLSX) [file pone.0024691.s012.xlsx]

## Sheet: "Heatmap"
Supplementary Table S3a. Schizophrenia gene expression "heat map" of all genes in SZGene.
gene_symbol	Dorsolateral prefrontal cortex									gene_symbol	Ventrolateral prefrontal cortex									gene_symbol	Anterior cingulate (medial prefrontal) cortex									gene_symbol	Orbital frontal cortex									gene_symbol	Posterior superior temporal cortex (area TAc)
	21wg	24wg	4mo	6mo	4yr	11yr	15yr	23yr			21wg	24wg	4mo	6mo	4yr	11yr	15yr	23yr			21wg	24wg	4mo	6mo	4yr	11yr	15yr	23yr			21wg	24wg	4mo	6mo	4yr	11yr	15yr	23yr			21wg	24wg	4mo	6mo	4yr	11yr	15yr	23yr
AGT	1.50993	5.25811	33.0954	15.1572	32.7125	27.6241	15.5513	114.395		AGT	1.71767	6.19737	21.5472	26.8328	36.9672	32.8313	22.1768	105.733		AK1	79.0348	75.2984	89.0043	38.5762	102.247	55.8378	41.6979	57.014		AGT	0.697443	3.18418	39.0718	7.46156	70.2727	28.1299	19.1267	100.718		AGT	3.02991	8.49419	35.9794	19.8089	52.8158	47.828	20.2922	121.18
AK1	85.3515	82.6475	117.751	33.4302	87.2213	62.0825	59.9126	76.3326		APOD	5.03638	41.8561	66.7336	108.422	160.226	107.835	207.542	289.748		APOD	7.64967	9.8479	49.1197	87.0864	336.166	160.518	238.969	240.768		AK1	76.0945	85.9254	92.7031	24.203	154.201	53.9002	48.2428	58.8635		AK1	131.06	75.6112	84.7586	26.9483	72.7432	56.8704	43.9514	50.9137
APOD	3.86108	10.1546	67.5634	55.3096	193.116	89.4839	181.032	198.243		APOE	8.93949	78.0153	224.481	1178.14	377.971	361.41	140.015	599.546		APOE	9.79926	66.7741	233.958	771.341	1050.56	174.741	202.419	542.435		APOD	6.50071	11.2133	69.1821	53.6292	271.077	267.346	199.962	324.656		APOD	7.54341	16.4115	59.784	75.5751	201.499	90.5778	195.117	333.253
APOE	16.9447	63.6002	344.492	841.132	664.72	214.342	178.583	1056.36		APP	273.739	278.778	590.107	26.0104	75.732	252.875	465.908	368.373		APP	316.517	300.159	344.501	20.2472	87.7747	281.47	378.995	401.299		APOE	16.697	57.1058	534.87	614.423	1257.25	228.999	204.086	609.146		APOE	20.6463	74.376	222.62	525.846	771.352	372.72	104.257	578.881
APP	286.195	284.485	551.882	10.3324	34.6967	302.459	568.531	263.849		ATF4	110.772	265.638	90.5974	68.5638	116.912	76.7712	85.5895	105.709		ATF4	162.963	225.934	113.09	59.8363	138.955	90.2295	82.6938	88.8552		APP	331.403	249.521	245.195	8.45493	55.0513	300.584	531.489	388.069		APP	279.399	142.856	341.939	10.9288	37.4983	123.56	420.542	325.918
ATF4	112.36	208.248	70.1064	54.4983	130.763	79.9137	66.3675	72.319		ATN1	52.1876	128.707	54.5572	14.8792	11.8731	52.9344	48.546	57.0856		ATN1	49.4077	117.095	46.9133	11.4827	24.8181	43.5651	42.0762	57.3491		ATF4	130.746	225.056	81.1102	56.0684	147.566	76.9267	70.201	88.2696		ATF4	155.174	308.372	117.901	51.2319	155.067	62.3427	103.947	85.7608
ATN1	85.4433	117.357	58.1993	6.04018	10.2198	56.5642	58.8027	59.9266		ATP6V1G2	35.6222	53.3158	120.137	26.8652	61.7081	90.9632	119.097	77.7626		ATP6V1G2	33.0252	48.7086	107.338	14.1392	84.8638	84.8816	92.6186	79.9473		ATP6V1G2	39.4635	54.0869	81.9373	9.70266	117.767	80.6783	113.929	61.5363		ATN1	124.785	114.595	40.3436	4.28373	11.2552	29.4019	43.9462	56.7308
ATP6V1G2	39.0072	46.4145	116.437	12.3027	91.5826	101.962	119.184	62.8255		BASP1	209.225	767.232	487.331	32.4114	41.6952	246.9	256.973	205.099		BASP1	213.027	571.745	280.57	11.3728	109.604	184.241	194.702	206.945		BASP1	342.756	605.451	481.064	7.03352	175.891	172.506	304.152	164.308		ATP6V1G2	59.4403	63.9617	114.617	12.1471	78.3	86.8838	113.149	60.4767
AZIN1	55.678	102.014	66.472	2.17363	3.52958	70.4871	66.5361	29.1888		BLOC1S1	47.1933	73.9609	73.1847	184.97	122.865	94.215	98.0648	78.1778		BLOC1S1	57.0193	61.1813	92.3963	130.546	356.252	69.9956	85.3507	70.9956		BLOC1S1	70.1819	77.9118	70.1035	146.678	366.883	78.9248	84.8049	83.0783		BASP1	292.918	650.741	271.427	6.47288	55.3654	126.802	177.141	148.845
BASP1	560.678	637.267	555.792	9.20413	82.6205	218.963	354.853	192.45		BSG	38.8704	126.921	141.266	113.747	66.9441	166.051	140.007	189.966		BSG	44.8031	113.716	120.453	73.5931	145.277	125.481	107.393	175.672		BSG	50.8667	111.128	168.059	41.1992	221.942	137.085	140.393	167.87		BLOC1S1	123.477	107.646	88.8778	136.661	287.93	101.426	78.5972	67.5245
BLOC1S1	72.2665	66.6629	76.2336	186.159	259.903	91.9822	76.9769	103.984		CALM1	666.132	437.836	975.591	70.4716	212.798	597.371	787.733	430.52		CALM1	592.034	388.208	707.474	51.8689	154.335	586.648	769.153	529.193		CALM1	542.628	333.026	330.32	43.1541	90.197	544.039	646.109	487.532		BSG	81.703	115.734	100.424	48.4413	105.178	122.679	120.028	150.356
BSG	50.2923	116.838	150.03	57.9584	133.301	166.115	159.934	156.306		CCK	7.65307	28.9632	138.051	135.108	344.916	576.667	332.663	294.246		CCK	8.0622	39.4552	144.991	46.1369	853.228	300.308	240.885	260.193		CCK	9.92564	39.3603	193.387	71.7252	1355.61	381.463	278.148	245.028		CALM1	593.668	307.879	1121.99	49.9822	146.721	694.355	949.026	353.673
CALM1	361.193	450.543	671.512	45.2224	88.6242	676.4	635.994	336.76		APC	48.9785	24.3217	142.322	9.73356	7.83378	23.0712	56.905	22.7227		AQP4	1.51788	4.30493	24.5913	19.8954	14.2407	24.109	61.8175	111.627		AQP4	1.62224	2.509	39.3043	9.71143	10.473	15.0537	29.0448	111.241		CCK	23.6194	52.4745	134.082	80.8065	882.737	500.865	336.303	202.822
CCK	7.00986	32.2593	163.291	83.0619	871.524	526.621	341.618	198.436		CHGA	34.1256	66.8077	185.334	18.0352	33.3307	108.221	94.1562	148.18		CHGA	38.3508	50.3529	126.446	6.04815	64.1361	81.0577	59.4039	140.772		CHGA	46.9856	51.7017	121.152	4.22551	61.3587	76.331	120.698	99.4892		APC	21.5312	13.1508	164.276	4.94829	3.74531	19.1996	49.4529	30.2129
AQP4	1.0577	2.83537	42.9648	14.0693	8.01844	16.2349	21.3034	202.606		CHGB	64.5178	47.143	222.692	10.6224	19.585	50.9479	82.0541	74.753		CHGB	89.7833	54.6012	159.33	5.42447	27.3073	63.4086	74.4189	71.8827		CHGB	69.5781	41.7312	83.5755	3.71693	18.316	46.1771	105.137	58.4424		AQP4	2.1374	3.09837	30.6789	9.34617	11.2727	37.3841	28.0669	110.356
CHGA	62.6838	50.4912	196.91	4.7261	38.0303	108.693	141.366	90.6629		CLU	31.5399	90.3214	366.047	843.608	437.164	612.81	610.665	1371.23		CLU	31.0181	92.8335	503.207	686.612	752.233	571.519	610.908	1270.06		CLU	66.3013	72.9936	498.956	335.079	834.025	515.863	630.818	1196.92		CHGB	82.0449	60.2444	147.91	3.6638	11.3115	27.6058	73.8388	47.7946
CHGB	67.5034	40.9332	209.905	4.24749	14.1833	56.6925	111.328	52.7868		CNP	22.6159	53.2612	117.41	62.5248	64.301	159.922	219.08	403.865		CNP	23.8576	47.324	45.7359	55.6518	138.954	211.105	255.689	384.131		CNP	34.0816	40.3208	80.1699	15.913	146.373	482.389	238.948	532.178		CLU	28.8981	74.1643	385.593	348.817	412.338	446.25	504.745	1141.98
CLU	24.3871	68.8582	439.939	437.106	428.883	658.01	643.508	1626.51		COX6A1	30.1609	151.826	140.648	266.823	241.459	276.281	170.2	187.891		COX6A1	30.6283	129.336	149.895	163.617	641.513	162.001	140.556	169.375		COX6A1	46.3849	152.526	223.886	172.983	761.909	187.733	147.769	162.577		CNP	63.2418	34.5969	59.8375	15.8019	92.9976	94.848	161.615	464.787
CNP	32.3659	47.9501	101.531	19.7414	81.098	123.387	270.697	239.12		CPLX1	3.06535	9.66039	90.5878	26.4822	33.7283	52.6891	118.348	112.783		CPLX1	3.94611	6.51975	50.2628	7.0331	84.6439	35.2975	58.3132	127.092		CPLX1	6.64765	5.96495	113.856	6.12754	108.009	39.1934	96.3013	89.0099		COX6A1	91.0487	193.721	136.727	170.392	612.53	410.545	172.304	168.188
COX6A1	54.4158	147	194.766	212.215	429.246	249.942	176.487	220.867		CPLX2	37.5436	26.1997	281.454	31.7532	30.9798	98.8224	203.128	150.777		CPLX2	37.2191	34.2148	144.93	13.9864	45.4512	72.0855	101.97	182.646		CPLX2	48.2716	15.8298	177.303	11.1842	38.048	84.8529	162.721	148.958		CPLX2	102.359	18.8598	245.185	10.1261	34.085	134.081	138.892	127.341
CPLX1	12.5784	7.56566	97.6648	8.30408	55.8741	49.8526	156.453	107.421		CSPG5	55.6723	138.174	123.71	90.5192	39.918	55.7274	51.6121	70.6515		CSPG5	63.4487	112.916	115.722	71.7175	50.0032	50.2028	54.4201	66.7415		CSPG5	61.0697	102.696	144.202	39.3987	69.7023	45.6357	64.7259	69.9739		CSPG5	99.0919	121.142	87.1558	36.0414	37.0496	45.4881	44.5743	67.913
CPLX2	64.9242	32.955	298.595	13.7074	17.2351	99.9362	187.196	120.495		DBI	32.4063	50.6761	36.6802	143.683	101.668	45.9361	37.2231	70.4598		DBI	54.5944	43.1732	56.6677	149.415	135.245	47.4331	53.2764	60.5983		DBI	43.039	54.9188	43.8053	166.855	109.353	53.5614	28.3037	66.6758		DBI	16.7226	46.4394	58.6106	161.841	191.908	76.8745	47.0663	69.1743
CSPG5	59.5	97.4437	123.164	44.8624	30.9385	47.9894	57.3397	111.469		DLG4	49.7098	77.8024	185.368	34.606	53.5753	107.425	163.48	82.4713		DLG4	54.5058	74.0742	155.277	12.9611	77.6641	107.644	132.034	85.5938		DLG4	52.7067	61.884	162.403	10.0931	93.4537	87.3756	152.556	90.6276		DLG4	144.686	77.6344	160.037	13.2121	66.3996	89.6762	120.333	75.0945
DBI	27.3442	46.2272	35.2565	160.253	103.308	40.3906	24.0274	66.6009		DPYSL2	211.974	339.103	101.668	6.91377	11.868	83.7123	140.287	105.178		DPYSL2	171.297	348.373	51.8673	4.77811	22.7827	96.3073	122.427	127.056		DPYSL2	195.05	228.101	68.3859	1.80422	5.97606	114.502	148.153	132.682		DPYSL2	355.131	156.986	51.1284	2.46767	5.06356	44.8515	113.666	123.054
DLG4	56.7145	70.5188	182.552	13.1589	58.9812	122.092	166.519	110.569		DYNLL1	203.343	298.155	157.11	99.2186	256.272	276.766	194.371	266.17		DYNLL1	327.682	235.557	310.024	68.713	325.706	268.267	240.415	232.919		DYNLL1	233.629	282.973	194.058	68.7918	501.992	286.721	150.171	226.141		DYNLL1	316.328	320.358	309.03	81.4577	353.85	259.623	336.929	211.866
DPYSL2	203.344	385.101	91.142	3.12602	5.13975	90.0606	171.307	90.1116		ENO1	89.101	187.863	155.447	133.372	149.006	273.562	168.484	283.73		ENO1	112.487	150.702	187.742	95.5839	187.167	280.584	202.226	268.903		ENO1	114.628	180.328	172.666	64.284	221.657	235.253	155.189	258.762		ENO1	181.212	175.926	169.663	72.8021	148.397	246.063	193.968	244.615
DYNLL1	191.126	263.812	197.903	69.4993	361.886	296.789	191.952	153.278		ENO2	143.737	215.697	233.958	9.34947	64.0427	241.239	262.173	173.266		ENO2	161.552	196.75	207.977	3.48274	74.7682	239.231	189.16	197.242		ENO2	152.363	184.318	155.352	2.37596	63.2695	208.258	251.538	155.438		ENO2	264.982	171.156	186.077	3.22458	29.2423	144.549	252.104	139.215
ENO1	92.1816	177.463	183.413	79.1961	154.399	297.008	158.593	256.926		FABP3	156.284	201.965	299.238	48.145	168.133	120.879	159.342	111.798		FABP3	223.69	130.939	325.845	23.1941	196.307	134.668	143.309	98.9435		FABP3	125.116	177.722	182.15	19.9683	312.09	108.759	127.227	88.4184		FABP3	197.237	148.573	342.313	32.6081	195.848	75.9923	167.976	85.9953
ENO2	135.922	195.268	242.273	1.47637	40.7201	295.142	277.649	110.39		FABP7	546.417	448.412	106.805	191.91	100.54	36.9145	45.4781	48.6811		FABP7	686.184	356.16	129.598	191.707	117.418	58.7937	68.7847	44.1545		FABP7	932.008	623.448	61.0023	164.983	86.3117	36.9346	40.4455	39.9119		FABP7	1067.47	827.161	145.02	169.919	144.848	81.3634	33.9417	35.4204
FABP3	111.018	146.735	316.512	29.4384	272.148	117.066	144.322	67.6428		FEZ1	130.165	200.526	169.974	98.7315	147.802	154.314	183.461	185.84		FEZ1	169.697	194.726	154.283	72.4592	200.479	158.125	178.66	170.302		FEZ1	157.028	197.252	129.076	47.5059	256.693	210.976	154.118	199.317		FEZ1	163.439	204.774	153.661	53.1361	212.692	137.246	169.168	181.418
FABP7	768.631	501.437	109.457	186.958	74.057	40.8956	30.9531	84.1628		FXYD1	6.41039	7.43753	33.7668	203.62	94.4936	42.6487	42.2635	99.7965		FXYD1	6.62197	8.20824	42.2728	156.51	226.625	45.6246	47.4885	74.7149		FXYD1	7.34902	8.95891	38.3004	111.232	227.444	41.1207	39.7784	79.8688		FXYD1	10.5255	9.27891	40.0546	102.682	142.847	41.5513	37.4325	79.3747
FEZ1	139.861	199.681	170.623	58.1004	157.408	150.765	169.858	147.675		FXYD6	126.406	245.624	194.89	34.7081	60.3666	139.599	135.618	95.5652		FXYD6	133.748	217.725	172.955	24.6648	104.179	127.145	126.331	91.1223		FXYD6	165.922	225.968	226.679	15.5491	165.317	116.227	145.665	91.4566		FXYD6	148.635	224.117	158.997	17.5001	85.9802	117.44	134.39	81.2091
FXYD1	6.00271	8.03424	44.9637	161.141	141.128	35.2622	39.4047	126.177		GABBR1	41.9469	62.0628	109.35	30.7781	16.833	94.7106	84.8863	66.7345		GAP43	713.601	561.038	480.317	41.2039	273.121	312.142	379.865	285.803		GABBR1	46.0695	55.4431	104.133	15.0345	35.1503	79.5388	89.6072	68.5748		GAP43	454.691	488.755	485.341	27.5351	264.997	293.809	338.516	212.258
FXYD6	187.695	246.717	172.456	15.5463	104.518	138.353	167.2	112.145		GAP43	429.019	571.954	510.878	77.2125	208.989	307.931	442.492	280.521		GAPDH	394.577	918.569	714.893	244.358	835.618	1237.65	568.41	966.062		GAP43	426.309	504.105	323.789	21.1324	364.48	246.521	385.039	249.725		GAPDH	573.413	1088.6	633.449	298.977	861.292	1109.12	918.526	883.542
GABBR1	47.5685	55.2435	100.483	13.3798	17.3127	105.529	97.234	80.8588		GAPDH	274.5	1186.73	402.963	374.31	625.378	1411.44	574.453	990.593		GFAP	8.58173	19.4829	186.268	120.604	203.171	151.555	188.249	332.406		GAPDH	354.893	1191.56	515.45	321.191	926.94	1224.39	450.731	877.774		GFAP	22.4088	15.8431	158.383	19.4743	92.0269	119.681	61.1975	317.754
GAP43	465.175	475.499	586.479	32.2225	254.519	326.704	434.481	277.505		GFAP	10.6587	15.3574	184.864	111.287	76.2773	98.9636	100.572	409.414		GLUL	33.0263	75.1215	106.652	162.789	65.5913	327.719	217.374	826.485		GFAP	6.77436	6.45992	338.138	18.7973	161.534	159.649	125.359	511.146		GLUL	55.7668	55.1933	100.471	88.1816	83.7425	468.238	168.025	712.094
GAPDH	247.594	1066.49	404.913	283.171	1072.53	1607.21	474.504	406.987		GLUL	34.4708	71.7111	80.5016	202.972	89.6996	393.009	130.294	779.536		GNAO1	115.036	136.686	117.243	7.47071	24.9568	96.3545	114.164	95.964		GLUL	46.6573	68.2684	91.4084	89.9981	70.553	417.752	119.085	808.621		GNAO1	200.87	113.074	104.174	4.1384	11.613	38.8977	122.311	94.2676
GFAP	6.70046	8.22718	222.968	29.5893	80.5085	85.7957	113.957	521.173		GNAO1	113.358	143.068	167.067	12.8703	15.6405	81.4978	134.19	84.8114		GNAS	170.258	251.678	203.763	52.5154	112.193	143.062	148.47	178.517		GNAO1	103.055	109.523	113.479	3.0393	18.8773	84.0562	136.305	95.5305		GNAS	297.779	286.81	186.424	36.1834	76.197	65.0129	162.138	159.263
GLUL	32.2091	87.3899	102.163	71.319	38.4056	315.179	115.911	695.479		GNAS	137.799	289.662	192.336	80.0852	83.175	113.244	174.188	185.13		GNAZ	60.0549	105.252	47.5082	1.83612	9.92257	36.2815	35.8342	25.0168		GNAS	174.605	270.911	148.26	33.7042	102.175	110.276	165.843	160.904		GNAZ	189.691	105.927	45.0516	1.31383	8.53072	25.8822	34.6137	26.5239
GNAO1	94.8242	125.668	152.491	3.49703	10.314	96.5722	139.663	90.781		GNAZ	69.2252	114.273	71.4154	2.89156	7.4716	39.1034	46.6265	23.7369		GPM6A	898.805	1109.69	865.559	157.511	215.349	360.129	463.672	403.137		GPM6A	911.848	1397.24	905.003	97.1493	278.203	408.325	539.739	388.13		GPM6A	1039.15	1369.76	801.531	163.895	164.843	519.458	521.039	421.319
GNAS	159.286	252.743	208.306	35.3449	77.2107	124.933	181.109	162.483		GPM6A	770.29	1218.89	995.629	227.337	224.427	456.868	541.155	418.911		GPX1	21.6264	104.663	49.1252	55.6954	205.257	49.8352	42.4151	56.9675		GPX1	26.8265	130.599	66.7484	60.8584	251.232	66.0508	47.2329	50.2705		GPX1	46.8927	155.924	38.9264	56.2894	191.858	116.533	48.373	56.2882
GNAZ	79.8616	114.503	68.8171	1.09705	6.30505	39.375	47.4717	18.9526		GPX1	18.261	137.036	31.5737	76.3144	69.4785	102.368	52.227	59.2597		GRB2	94.859	113.851	81.5327	10.6618	33.2535	56.9682	63.1148	45.5521		GRB2	101.078	98.4447	62.3427	4.74511	40.8306	58.4498	70.9008	44.0116		GRIN1	78.0988	32.5885	81.4868	2.18633	14.7573	39.3301	101.951	77.4356
GPM6A	807.116	1178.16	1109.29	119.313	112.593	495.563	568.698	499.164		GRB2	102.179	126.951	103.57	14.0847	22.1181	60.6677	69.1475	45.6596		GRIN1	31.0885	48.1039	106.576	2.91221	37.8043	93.0388	79.7032	106.371		GRIN1	29.1893	30.3604	105.502	1.12684	35.653	82.6068	143.28	87.8031		GSTO1	14.4205	29.3789	46.6035	62.4662	127.438	109.821	76.0368	54.3268
GPX1	25.7603	118.122	41.6915	71.2556	181.384	84.7673	45.0796	44.194		GRIN1	29.8069	41.679	159.877	7.36531	20.8263	102.922	129.903	106.168		GSTO1	27.5734	31.0749	47.5301	43.3332	123.923	77.06	65.4611	60.0748		GSTO1	19.1483	37.4593	39.284	50.6969	169.967	82.9223	43.6144	57.1244		GSTP1	194.328	255.724	85.1208	93.5454	201.045	119.168	61.0928	86.607
GRB2	91.2948	118.735	85.4134	6.08058	24.2913	63.8629	66.8997	47.0597		GSTP1	66.3688	201.157	84.5949	146.756	125.241	99.6439	64.9403	96.3016		GSTP1	97.6493	188.398	115.82	118.123	313.654	91.1328	68.2809	80.8905		GSTP1	96.55	237.377	141.651	98.0466	328.802	101.722	60.9035	91.9541		INA	156.208	152.054	58.1173	0.297445	6.34243	22.7821	64.7775	36.0346
GRIN1	42.3406	38.8087	152.626	2.11415	24.5196	123.96	172.732	70.6643		INA	110.278	272.56	89.0608	2.04263	7.09984	40.0329	79.625	40.7771		INA	99.4665	257.702	55.4277	0.692947	21.8302	27.7172	48.341	53.9851		INA	124.536	215.2	79.514	0.62266	12.5021	32.6393	74.6522	40.245		KIF5A	58.0231	16.5095	130.901	5.26491	30.8485	39.2152	160.319	125.706
GSTO1	15.4774	33.3782	31.4237	67.1541	111.658	89.5204	43.5873	43.6052		KIF5A	46.3012	34.4406	142.588	15.2649	20.5584	58.3042	167.725	113.553		KIF5A	39.6252	47.8968	77.7693	13.9694	45.4348	78.3368	156.828	137.612		KIF5A	40.1966	21.6931	78.4306	6.91164	16.9534	60.7808	179.909	137.59		MAP1A	24.417	9.08981	87.7973	5.00314	9.13282	73.7886	121.959	104.962
GSTP1	97.5945	199.201	90.5072	119.936	218.668	98.227	57.7701	99.5161		MAP1A	21.6858	15.6915	134.887	9.81744	12.806	116.814	159.681	102.983		MAP1A	22.1215	21.0375	84.1799	10.2819	36.5668	121.03	128.078	139.31		MAP1A	17.3426	8.9736	86.3296	6.67509	13.767	92.9465	169.189	123.223		MBP	0.736981	0.837598	362.747	135.263	759.522	293.487	602.643	1680.58
INA	148.581	301.439	113.187	0.860116	4.04797	43.9506	101.756	28.8769		MBP	0.916901	1.34202	264.789	596.121	225.945	387.991	875.315	1290.34		MBP	1.05884	4.11717	57.2689	505.788	758.405	615.846	1197.87	1049.81		MBP	1.16167	1.64092	296.941	123.909	787.83	1226.72	929.836	1889.26		MDH1	60.9785	115.812	218.47	66.5932	236.758	331.002	394.438	185.667
KIF5A	39.9502	38.9883	137.224	4.86815	13.29	60.4752	183.289	175.496		MDH1	51.4688	102.726	185.619	103.151	218.531	341.972	360.402	208.871		MDH1	69.6248	78.4859	198.062	46.8685	222.938	310.887	287.206	216.328		MDH1	46.7321	98.5002	176.372	40.7113	316.101	305.538	273.565	175.041		MIF	245.515	925.957	215.026	317.587	1026.09	471.863	321.94	291.399
MAP1A	17.6599	18.3023	136.793	7.81011	11.4983	145.21	181.148	106.695		MIF	85.9577	757.93	219.622	546.336	452.005	587.686	343.187	284.315		MIF	104.447	544.158	287.317	296.106	1555.38	323.823	266.936	268.025		MIF	105.261	730.709	431.054	315.379	1614.85	381.786	308.283	270.584		MPPED1	284.361	152.525	57.534	1.01507	9.63757	39.9212	35.8095	25.1527
MBP	0.568164	2.90498	162.226	140.976	433.389	227.11	917.604	1212.47		MPPED1	140.598	274.208	79.1639	4.0304	9.12034	51.298	45.5579	30.7483		MPPED1	106.007	210.586	62.0342	2.21581	12.2878	42.8418	34.3155	33.4437		MPPED1	156.181	209.997	77.9267	1.01328	14.3656	38.867	39.9714	33.0707		MT-ATP8	1617.37	2767.93	12757.8	16532	14296.5	12851	10199.5	11562.2
MDH1	39.3323	81.4394	147.65	48.5048	180.106	374.66	281.752	128.661		MT-ATP8	2170.07	1877.5	5456.78	24952.8	7036.6	7633.06	6760.3	8094.56		MT-ATP8	3088.08	1523.24	12425.6	26879.4	9650.31	8425.29	9225.39	7396.98		MT-ATP8	2467.63	2311.05	6058.92	31285.3	7277.96	7303.52	5785.72	7439.25		MT-CYB	2429.19	3396.86	9970.63	15214.5	11335.7	14152.8	9516.07	9662.5
MIF	132.431	634.167	278.868	383.281	1182.22	488.181	309.347	249.697		MT-CYB	2030.37	2395.47	6857.04	21405.1	7422.35	11323.2	7988.22	8483.85		MT-CYB	2762.27	2084.06	12109.9	22855.9	11784.5	11117.2	8950.74	7637.4		MT-CYB	2370.65	2750.3	11217.5	25653.8	8841.01	10664.2	7552.4	7294.73		NCAM1	159.973	27.3824	29.4764	0.688099	1.70429	10.62	37.8917	51.3996
MPPED1	187.51	286.757	89.78	0.973887	10.0426	54.5071	47.3556	26.5054		NCAM1	117.27	77.9159	70.5984	2.2469	2.504	22.0374	44.6488	44.5095		NCAM1	94.9211	109.255	26.9208	1.56125	7.97258	24.9434	44.7073	50.3472		NCAM1	122.271	50.2246	28.8662	0.505046	1.67039	34.1271	53.1906	57.427		NEFL	92.7738	98.845	259.943	6.00716	28.9524	139.762	321.308	200.376
MT-ATP8	1648.85	1844.22	6234.53	22345.7	9110.32	7549.04	5169.61	6984.92		NEFL	55.9941	119.55	412.6	19.0933	56.0888	232.812	449.537	273.645		NEFL	25.7002	20.2602	195.909	16.8961	84.012	183.139	265.427	348.005		NEFL	40.3863	37.8259	248.913	11.1157	66.4208	170.937	394.743	229.503		NEFM	138.106	83.3612	92.3511	3.72288	10.6651	31.5046	112.044	156.533
MT-CYB	1894.37	2227.37	7979.4	21242	7938.89	11371.5	6602.32	8803.49		NEFM	76.8762	78.5089	148.522	11.4819	22.8197	76.2943	174.978	244.073		NEFM	80.8955	42.4709	69.0044	9.32191	34.5931	94.5156	96.2938	301.392		NEFM	89.1075	50.9885	50.8356	6.40426	12.8288	60.5221	142.387	158.744		NPTN	36.6059	31.4823	89.7074	2.24395	13.5409	60.9	127.737	60.3753
NCAM1	119.356	105.639	59.878	0.520459	1.5428	24.2412	56.9066	40.1316		NPTN	31.2088	42.3995	151.275	7.35238	26.2456	95.9654	135.374	75.0628		NPY	21.3756	24.207	148.905	26.0932	313.074	22.2441	69.6469	24.317		NPTN	25.6011	28.6311	88.4593	1.27461	37.8709	81.2	136.398	67.2888		NPY	283.474	299.499	123.545	25.1661	141.049	7.23991	34.6232	41.7215
NEFL	44.2593	67.8301	387.694	14.1849	33.8605	268.976	505.456	156.79		NPY	30.773	52.5625	142.614	48.8006	82.4881	10.3374	59.2853	16.6867		NRGN	10.4666	32.3999	920.042	90.5968	1816.2	858.331	879.364	895.415		NPY	26.1565	32.0064	152.398	26.8028	240.248	16.8831	44.228	29.958		NRGN	51.6831	86.589	820.434	90.609	957.469	632.025	1074.11	715.374
NEFM	98.8689	66.9184	119.214	6.94778	16.931	102.411	189.365	99.2065		NRGN	8.5423	28.2966	1650.84	497.376	679.161	1520.62	1666.56	918.159		NRN1	10.9177	11.0242	99.5018	10.7264	109.193	140.903	148.977	106.517		NRGN	4.06817	12.0061	3347.53	76.115	5713.78	1087.75	2053.83	743.503		NRN1	19.2754	17.8302	141.649	9.7435	120.567	252.419	228.2	91.6982
NPTN	23.2021	32.1877	115.562	1.76467	11.7245	114.125	155.105	52.4449		NRN1	9.2434	12.6023	165.895	30.9987	101.697	251.269	263.072	103.608		PEA15	86.9346	182.182	218.261	123.019	166.237	281.674	358.436	211.36		NRN1	13.5781	11.2703	142.074	9.84404	191.847	170.376	233.718	108.554		PEA15	92.4123	85.6057	224.425	72.895	165.384	227.229	294.16	256.158
NPY	20.2626	29.3175	85.8365	36.4325	178.032	13.7708	41.2551	38.3044		PEA15	81.2937	134.645	190.239	148.669	96.0715	239.912	265.489	219.928		PLP1	0.972306	3.82812	18.9109	49.5999	285.001	765.481	1217.33	1035.61		PEA15	178.649	141.777	248.929	83.8932	209.395	212.984	259.888	255.034		PGD	124.962	97.2372	27.158	3.21219	9.0862	15.6781	17.3676	18.8701
NRGN	10.0167	16.7557	1929.21	139.434	1904.37	1210.26	2772.39	1015.44		PGD	68.8604	115.274	32.0945	5.7527	9.52521	19.5446	17.721	21.229		PRNP	64.1527	86.5573	171.617	22.131	61.8484	145.621	290.289	204.32		PGD	78.7141	116.48	16.5084	3.18538	12.3059	18.7459	15.3477	19.3705		PLP1	2.50657	2.08092	117.297	18.0299	160.309	377.553	831.703	1437.13
NRN1	10.3901	10.1789	170.897	12.5243	86.1883	237.083	240.759	83.8684		PLP1	0.397058	1.90863	161.872	48.3992	105.538	536.36	881.044	1133.52		PSAP	111.467	179.09	195.198	66.6378	170.427	217.078	234.936	277.053		PLP1	0.52279	1.51594	122.513	9.92118	125.332	1820.59	783.527	1572.69		PPP3CA	34.0665	12.0286	76.6096	5.54305	7.90768	55.503	139.619	69.558
PEA15	73.3223	128.722	206.614	70.5222	105.733	236.172	200.497	239.87		PPP3CA	29.0157	23.1673	90.611	5.40409	13.8975	76.0344	142.272	70.0942		PTGDS	1.21778	25.992	65.3238	101.472	651.677	208.865	202.431	378.804		PPP3CA	26.321	17.1419	48.8349	5.11201	8.37883	77.2761	139.988	72.2397		PRNP	129.118	46.883	176.868	11.6087	36.7041	100.596	289.474	191.988
PGD	66.5287	119.73	32.49	3.28793	8.27373	20.201	16.6948	17.802		PRNP	72.0932	63.3191	269.96	31.6983	57.3182	151.941	340.976	175.397		RGS4	0.308634	1.01134	94.4114	2.70309	51.7985	159.697	212.124	97.2838		PRNP	76.3622	63.5576	154.317	7.86187	64.4277	179.857	365.826	207.371		PSAP	139.926	112.975	188.488	53.6381	111.507	197.687	264.251	243.441
PLP1	0.533946	2.4162	82.7616	9.90371	49.9489	394.02	762.493	538.076		PSAP	91.494	157.446	238.201	88.1697	115.878	240.781	276.7	282.636		RTN4	191.645	209.342	97.2662	9.22346	33.271	82.194	142.299	97.2657		PSAP	116.754	142.162	172.425	43.9664	145.212	252.13	270.684	269.682		PTGDS	2.6031	76.597	105.022	90.1223	347.48	191.498	138.5	459.33
PPP3CA	20.9	23.6104	71.2584	8.53927	4.78543	87.8308	133.141	37.9901		PTGDS	11.2852	53.9261	80.2302	189.439	187.141	219.581	179.314	433.998		S100B	15.8136	10.1252	150.981	402.691	703.306	141.105	290.678	298.97		PTGDS	1.32029	19.5083	237.066	121.081	862.716	333.558	200.517	452.016		RGS4	0.072346	0.35503	103.608	1.62433	28.7915	170.648	281.806	59.8981
PRNP	61.5532	73.7165	235.295	10.4364	26.6529	178.968	375.455	192.898		RGS4	0.517645	0.53099	177.231	7.27152	43.2609	195.647	314.883	84.9823		2011-09-05	98.9026	129.791	247.164	15.7621	124.615	163.313	158.74	140.293		RGS4	0.376461	1.20407	127.081	1.20494	70.0989	178.757	259.164	78.0062		RTN4	104.918	110.593	119.073	5.95855	20.5263	63.7006	169.214	82.3249
PSAP	92.5321	151.073	235.645	57.075	93.1995	279.161	284.613	227.304		RTN4	185.419	183.165	163.319	10.4992	27.7597	77.7006	168.051	89.5159		SLC17A7	15.6268	23.7165	218.799	8.00758	118.335	268.604	265.94	195.847		RTN4	162.267	153.59	86.457	4.43439	25.7833	90.4385	171.489	96.6903		S100B	10.5019	11.66	184.004	334.777	761.806	154.661	180.141	285.544
PTGDS	1.5769	66.105	159.383	175.585	368.326	158.115	202.658	490.144		S100B	8.56789	7.99768	112.413	374.457	394.456	107.954	191.341	364.085		SLC1A2	2.91885	5.67203	12.4364	4.66755	4.52727	33.656	78.881	305.841		S100B	13.2176	11.8217	65.8928	360.039	588.159	162.685	148.412	340.684		2011-09-05	269.835	125.094	243.075	14.7784	119.019	138.838	171.951	119.367
RGS4	0.111391	0.590473	137.849	3.41607	32.68	242.757	302.286	54.7001		2011-09-05	90.2092	133.616	293.326	44.9558	109.307	162.55	198.616	143.406		SLC1A3	11.4382	30.7935	31.8035	34.1634	6.15034	27.3914	78.2177	237.854		2011-09-05	109.65	110.642	229.102	12.2394	155.291	128.474	202.321	142.507		SLC17A7	45.7909	34.3246	209.358	7.06474	88.1887	266.167	305.254	163.777
RTN4	132.551	206.177	112.96	5.19068	13.4067	90.1688	163.014	58.8403		SLC17A7	15.0311	28.5714	329.002	23.3531	43.346	362.814	349.489	180.365		SNAP25	59.8665	52.5637	353.137	15.4961	272.657	644.614	930.698	851.862		SLC17A7	13.9502	16.9566	300.898	4.51214	179.192	266.11	386.256	174.774		SLC1A2	3.74162	0.667187	21.8534	3.01446	2.49274	34.9584	33.4718	284.484
S100B	9.43453	9.29633	130.931	373.718	494.527	100.365	128.492	356.986		SLC1A2	6.42532	1.7814	35.504	7.75842	9.63349	36.5022	46.7924	189.128		SNCG	1.8745	1.49053	86.7596	28.1763	147.319	70.4024	79.235	126.225		SLC1A2	7.60958	0.947782	16.5236	2.29692	2.67991	21.4705	39.5609	306.246		SLC1A3	10.0267	7.94118	37.919	11.7887	5.52557	35.8067	38.7117	209.914
2011-09-05	116.332	130.052	308.236	13.7305	104.16	161.528	217.194	163.77		SLC1A3	13.3658	16.1109	38.7247	47.5698	6.79131	33.7699	43.7612	198.114		SPARCL1	17.0141	25.92	249.061	236.311	182.964	244.981	484.456	596.881		SLC1A3	35.8872	18.3901	31.8523	9.75812	5.22673	27.4555	41.5638	238.457		SNAP25	68.3571	52.4608	569.106	13.6388	159.623	516.35	1343.29	590.085
SLC17A7	21.6895	20.5332	352.436	7.04508	97.6707	386.31	440.629	174.913		SNAP25	70.3121	70.6168	544.583	35.458	223.269	693.27	1450.1	815.042		SPTAN1	130.039	129.948	79.3023	4.82422	20.6491	68.6437	54.9213	79.0444		SNAP25	69.357	60.7733	284.621	10.8856	171.613	680.029	1198.19	642.779		SNCG	3.73914	3.4326	96.1748	37.3423	140.602	67.0865	90.3526	101.048
SLC1A2	3.73612	3.78961	32.5228	2.99573	5.55872	28.0459	35.1153	343.474		SNCG	0.666721	1.28419	83.2964	58.2913	110.97	72.9603	107.109	150.069		SST	80.1805	87.0292	367.287	47.3865	421.425	194.416	165.386	73.24		SNCG	1.01796	1.01341	65.6623	21.73	194.451	54.578	86.9468	110.026		SPARCL1	12.1671	19.1442	259.182	149.85	141.41	177.072	387.614	513.497
SLC1A3	12.095	19.1454	40.1702	6.89977	3.09652	24.1736	37.1537	369.267		SPARCL1	19.0767	26.8974	265.404	280.168	144.241	173.401	429.082	584.071		STX1A	35.9062	32.2942	106.869	4.42772	49.9837	72.997	83.2764	54.5079		SPARCL1	9.48449	14.9801	197.35	135.671	155.593	165.348	351.651	511.874		SPTAN1	159.054	94.722	74.9846	2.99399	6.84885	37.0958	54.1289	59.852
SNAP25	66.2392	68.0716	399.128	13.387	98.4409	787.2	1367.2	428.553		SPTAN1	124.45	107.409	117.666	8.25076	9.57942	63.4751	65.5224	69.5705		SYP	49.916	112.137	357.805	6.07198	169.283	207.707	276.738	222.256		SPTAN1	127.033	90.6478	57.9311	2.51002	10.9585	53.7	77.5373	69.3514		SST	18.8462	45.0882	224.88	49.2922	288.079	134.509	146.947	89.7047
SNCG	0.508178	1.24963	90.7278	26.3548	152.867	68.8536	98.739	137.416		SST	19.7337	49.6944	229.954	113.114	236.863	200.785	132.602	88.2213		SYT11	48.2588	80.2528	69.9091	6.81894	29.5775	74.5765	165.266	130.766		SST	18.4871	44.1852	431.436	43.1418	409.476	158.726	125.803	92.6419		STX1A	49.54	24.262	100.526	4.07253	40.0018	47.3866	96.6907	43.8214
SPARCL1	9.80802	21.5247	221.259	133.874	76.6904	186.416	380.528	659.16		STX1A	34.197	45.4384	143.76	12.389	41.1537	79.277	117.186	60.1328		TCP1	131.485	124.334	63.934	11.7644	35.312	54.0571	57.6784	49.5635		STX1A	43.8436	38.3367	82.3134	3.09824	82.977	69.2327	122.111	53.9192		SYP	87.6535	83.6759	306.979	6.83812	89.9701	147.711	331.253	158.599
SPTAN1	138.43	117.397	128.386	2.8375	8.77037	74.5169	84.0414	66.6076		SULT4A1	19.6999	32.7988	103.699	3.11399	24.9309	112.703	105.95	59.5723		TF	5.43098	4.16127	6.60682	21.7445	107.397	127.782	138.039	194.751		SULT4A1	20.5844	27.6683	109.67	0.578855	32.5768	82.2345	100.268	54.5021		SYT11	63.2508	25.3422	91.826	4.98021	7.97696	36.4685	169.725	125.627
SST	17.4739	38.793	268.264	52.342	273.131	189.07	135.479	155.609		SYP	47.087	120.131	522.862	22.991	85.2259	282.803	402.38	205.97		TUBA1A	4024.01	7433.67	1341.93	222.188	975.817	759.046	466.814	413.725		SYP	47.5507	78.628	428.873	3.99602	292.583	216.781	445.573	194.558		TCP1	77.6596	123.952	57.5131	12.649	42.2025	44.4085	74.4748	42.3048
STX1A	56.5565	39.032	128.205	4.2103	54.6239	83.4808	118.57	46.3809		SYT11	59.2799	59.4856	169.805	8.47494	11.883	85.8696	196.147	108.029		VAMP2	233.561	253.336	593.114	47.6238	312.653	388.45	451.145	373.002		SYT11	62.6141	35.7192	97.4332	2.96308	12.7782	87.7086	186.581	133.044		TF	2.68366	1.82244	19.8697	9.87872	62.6297	47.6727	98.1618	254.449
SULT4A1	26.7592	29.8344	101.232	0.737697	13.8187	116.557	114.561	40.8525		TCP1	93.979	135.441	52.6113	16.7669	47.8438	45.5552	57.5076	49.6049		YWHAB	113.325	156.555	183.929	14.6278	50.8546	161.023	213.625	109.832		TCP1	111.737	152.745	55.5803	10.0247	53.1582	50.91	52.9704	47.2571		TUBA1A	4055.93	7164.51	1069.68	269.578	878.651	682.198	599.916	477.757
SYP	53.096	103.171	481.52	5.48828	135.645	325.029	485.731	136.704		TF	4.08661	2.78151	37.5865	24.8681	62.6474	74.0992	112.612	213.167		YWHAE	910.88	686.025	528.6	97.4861	182.964	411.37	425.491	355.711		TF	4.00049	3.06049	18.0759	9.82223	65.8917	263.751	112.53	258.015		VAMP2	382.545	357.154	598.509	47.9822	212.06	290.601	482.232	399.656
SYT11	46.3478	70.4363	154.093	2.13229	4.88739	100.792	220.759	105.342		TUBA1A	2792.42	9078.28	813.642	372.453	691.718	844.781	421.113	461.726		YWHAG	225.096	412.416	274.661	7.67383	71.9168	317.87	416.102	279.12		TUBA1A	3127.1	8920.97	709.328	194.726	1032.76	919.989	357.952	471.926		YWHAB	97.2245	93.4199	237.478	16.3821	32.2305	111.212	244.064	80.9631
TCP1	87.6427	138.308	46.5622	10.0271	34.4908	50.0607	56.1681	37.5255		VAMP2	203.553	327.675	763.605	122.638	242.041	434.55	526.026	418.793		YWHAH	360.707	388.409	673.79	20.7186	214.441	733.695	708.13	477.22		VAMP2	263.688	285.605	556.141	36.3143	352.652	350.5	540.917	336.815		YWHAE	726.376	573.75	707.195	78.1003	284.824	420.263	554.738	301.078
TF	4.63013	2.6851	21.3053	11.7779	53.7067	56.5834	111.344	108.671		VGF	4.08993	20.3861	134.561	13.5763	25.7281	65.5067	72.3101	74.302		YWHAZ	172.994	231.019	128.717	3.99069	23.7657	143.791	125.904	76.4145		VGF	3.49884	9.44087	135.785	2.76695	75.2696	42.3208	114.545	55.1549		YWHAG	458.551	172.313	361.403	4.12364	10.6381	212.378	488.321	208.356
TUBA1A	2550.68	8566.39	828.879	220.461	987.563	909.414	348.265	206.187		YWHAB	105.84	139.114	253.641	16.5795	46.9098	154.017	219.927	85.9105		CALY	19.7494	74.6128	70.8029	13.0533	135.64	78.4389	53.3581	78.8139		YWHAB	108.737	128.724	125.948	11.7983	39.288	151.149	222.61	89.8843		YWHAH	368.731	370.707	646.483	16.5621	145.925	448.168	787.283	375.666
VAMP2	236.774	275.868	754.768	46.9043	253.83	470.128	588.575	429.979		YWHAE	672.73	729.492	485.63	114.112	296.467	411.933	409.009	349.506		SPP1	5.88892	17.4528	10.0808	13.9883	75.1705	73.0771	117.667	172.036		YWHAE	809.812	755.991	422.403	63.7211	317.508	438.621	359.119	355.362		YWHAZ	98.8291	136.456	171.827	4.31891	24.8203	138.952	189.925	54.7301
VGF	7.94517	11.579	150.618	3.79578	36.0836	62.7603	135.198	65.3988		YWHAG	313.058	370.543	614.09	11.9113	31.9081	368.532	582.286	227.8		MAG	0.060165	0.252319	4.66065	32.5758	105.102	66.8895	77.7814	125.772		YWHAG	325.778	266.098	388.441	3.23929	24.4225	333.62	552.702	230.041		CALY	58.2941	109.947	48.1998	14.0842	61.2225	73.6676	55.4302	69.8797
YWHAB	83.533	165.133	224.702	16.2529	29.5924	173.298	231.112	75.8712		YWHAH	300.441	433.841	757.759	32.5131	258.159	717.817	844.047	464.758		MAL	0	0.199484	2.23373	8.63298	116.614	67.2105	63.2009	75.9387		YWHAH	275.865	392.469	489.239	10.2132	281.367	613.795	792.43	428.585		BAT1	112.175	78.8967	35.3945	8.76273	21.6773	19.3583	28.5966	26.7305
YWHAE	591.76	753.775	507.086	51.3175	154.476	448.167	362.107	267.41		YWHAZ	162.232	259.747	140.687	5.88946	40.3037	157.507	119.132	66.522		TTR	0.203582	0.082026	6.13394	68.1647	166.503	0.188093	13.6813	3.01374		YWHAZ	136.21	207.963	71.6373	2.91404	25.9094	138.893	109.676	62.1672		CSNK1E	117.802	73.4678	22.7925	1.93799	7.82965	11.6156	22.5474	18.4724
YWHAG	324.876	452.946	653.825	4.31773	9.88632	439.471	694.256	177.204		CALY	17.4852	104.466	57.5004	40.2736	48.2865	105.662	62.7406	83.3066												CALY	14.5315	74.058	106.213	10.6827	179.727	67.827	63.2601	66.0688		GABRA1	1.06005	1.23175	41.2047	0.785075	2.79827	22.6595	105.639	23.4953
YWHAH	288.785	392.902	720.808	11.6258	174.217	810.735	846.556	312.711		GABRA1	3.86904	4.93109	51.67	1.13854	5.48793	32.2829	109.036	27.3653		SULT4A1	18.6652	32.4442	72.551	1.34477	29.4954	86.8589	68.5894	64.8219		QKI	20.2583	6.95734	19.3582	2.09306	4.01713	66.1376	53.0801	107.079		L1CAM	132.512	58.4903	26.534	0.413605	1.95885	6.7034	21.3068	14.4492
YWHAZ	100.779	253.327	140.383	1.92801	18.6422	177.521	130.841	34.8725		PENK	30.2652	118.894	72.9444	7.58743	17.6664	12.6928	12.9759	2.60411		PPP3CA	23.9093	22.6091	45.651	4.61859	22.4145	66.4721	95.3405	88.5257		RASL10A	2.99557	10.4784	61.9185	5.77222	193.012	25.1698	30.7321	16.9174		MAPT	125.196	24.5311	41.0325	1.43983	4.79214	14.9194	34.6163	22.8887
CALY	23.8825	65.6256	68.6131	16.7135	108.405	98.0433	80.2621	84.4391		SPP1	9.98866	89.2796	16.5632	12.2906	40.9308	48.8785	102.74	185.607		PGD	83.6333	97.6051	30.0651	4.85752	11.0905	18.7085	16.2153	20.9825		SPP1	8.59281	16.8144	12.3138	6.30093	40.893	160.392	82.4395	220.913		NDUFV2	13.4594	37.8846	54.1608	52.2672	119.3	53.4067	51.6608	35.6705
										TSPO	14.0525	122.572	2.74181	16.776	8.29391	14.3185	5.61018	10.8733		NPTN	25.1828	35.3078	77.5747	3.31148	30.4391	82.6799	96.7154	78.4456		CDK5	19.6263	42.7274	42.3699	12.22	101.32	36.9818	30.7888	24.3379		QKI	6.4237	3.24944	16.7062	1.5625	3.88324	33.8308	39.6938	100.95
ATP2B2	15.7464	17.7042	69.4269	1.07149	2.21865	55.7713	94.4614	19.0759		MAG	0.032655	0.097527	30.5523	40.0768	29.2356	57.3614	62.7701	128.359		GABBR1	49.2472	64.9623	84.6953	27.7768	28.7484	94.3097	80.9271	71.4211		CLDN5	11.5884	62.2429	60.5258	42.4258	108.097	26.0009	35.4418	30.5296		SPP1	5.19703	33.6147	17.7463	7.79189	74.1316	39.8573	94.9471	221.519
BAT1	91.8214	67.6249	34.6366	8.7528	18.9572	25.5266	25.2956	30.3194												AZIN1	65.6099	86.3747	52.3098	6.26442	12.5317	60.2764	74.7559	40.0339		MAG	0.029969	0.131331	26.0184	11.7306	74.7712	168.68	73.8291	165.403		TSPO	75.7809	176.264	2.14578	9.57951	19.6024	14.4008	4.73403	10.481
CAP2	16.9002	24.1992	40.4228	0.793213	4.21527	63.6831	83.2025	25.8527		ADRA2A	25.1853	81.7215	10.9885	0.266363	0.912103	5.72084	6.81929	3.06059		AGT	2.29743	7.00034	27.1411	22.9895	61.4422	29.6633	36.2496	92.7504		MAL	0	0	17.1917	3.14817	132.319	166.015	55.2063	118.483		MAG	0	0	13.4372	11.8876	44.6516	29.6265	51.4764	165.516
CSNK1E	73.8394	91.0985	31.0015	2.16638	5.30444	16.4162	24.5686	21.1096		AGPAT1	25.9211	83.5649	59.227	16.616	12.7099	49.9698	49.8354	40.1827		BAT1	81.0301	72.6336	33.8793	11.3585	23.7108	25.8185	26.0449	24.9896		MOBP	0.253831	0.076216	38.0272	10.5612	55.394	82.5158	55.6883	126.106		MAL	0	0.098935	6.86331	4.31457	66.1403	33.735	50.622	105.789
DGCR6L	14.9109	30.3624	33.1339	27.8192	80.6059	31.59	22.0047	24.3143		ATP2B2	18.6184	14.2125	82.5939	1.54266	3.6564	43.4165	88.4577	29.0702		CSNK1E	49.3879	89.5497	22.6335	3.07754	10.2052	14.8009	18.8402	22.225		CLDN11	0.359083	2.73437	15.2301	3.9645	31.799	122.056	51.8268	124.986		MOBP	0.202371	0.144295	39.2921	10.4797	47.8582	19.9058	45.4635	109.892
EGR1	3.03942	21.1639	68.3711	2.9299	6.05776	78.7621	85.2995	26.9084		CAP2	19.8615	23.207	52.7979	1.5009	11.7807	54.4363	83.9535	46.3087		DGCR6L	14.186	29.7869	30.2802	24.8445	86.979	27.6831	22.4188	24.3261												CLDN11	0.096706	6.06923	7.60851	3.06199	17.2841	22.918	35.4332	114.208
FKBP1A	26.6841	66.8259	41.3188	3.85337	27.7941	81.5351	54.0739	24.9169		CSNK1E	49.9196	88.5266	31.9434	5.57074	6.66401	16.5405	22.4878	22.6155		L1CAM	55.7262	99.0767	38.5227	0.672266	5.69416	17.3794	20.2558	19.3474		GNAZ	73.9293	86.3755	55.4291	0.970069	9.40657	31.5916	44.3136	28.5559
GABRA1	2.29118	3.92587	42.3662	0.286782	2.58286	38.1357	92.1893	16.5864		L1CAM	61.2813	87.3714	56.0677	0.988122	2.40532	18.2246	25.666	17.7338		NDUFV2	35.8731	24.6309	51.1619	42.1685	90.4038	41.7836	42.4337	38.8943		AZIN1	81.0835	77.7187	53.8629	2.63348	8.23564	64.192	67.8398	35.1311		SULT4A1	37.357	26.0459	74.2186	0.884117	14.7821	79.9	90.9644	44.3817
L1CAM	76.5799	85.0752	54.4848	0.40722	3.26812	20.7552	34.6809	14.4697		PIK3R2	40.5121	96.9514	49.1037	6.63595	7.56085	25.7488	27.1821	19.4172		PIK3R2	44.9744	98.8378	47.2889	3.05623	11.899	22.3034	23.8513	20.9639		ATN1	65.7715	97.481	66.0176	5.77221	20.8662	39.1513	54.1195	56.9414		GRB2	83.8317	81.9751	92.7876	5.32601	26.4226	51.1162	69.7819	43.7221
MAPT	73.4538	76.9226	85.8336	1.78506	4.99125	25.2433	54.7262	23.6818		PPP3CB	58.6115	61.1109	93.5241	3.11256	21.9441	69.489	85.9776	31.317		QKI	6.97031	15.177	7.85204	5.99171	11.2095	35.5242	70.5646	90.9428		ATP2B2	14.3367	7.83739	41.8054	0.617201	3.73885	36.1853	82.5956	32.9727		CPLX1	13.7114	10.2956	62.3611	5.86938	47.2201	31.1557	71.785	86.3341
NDUFV2	18.9285	29.9739	28.2303	53.9641	87.3338	42.3498	37.6836	32.4226		SYNGAP1	37.3547	30.314	83.286	3.35876	3.31964	23.7251	34.6619	17.0759		RASL10A	4.92118	16.452	22.0982	9.93648	81.3926	22.6128	22.6131	18.0118		BAT1	86.4734	74.0681	23.2095	8.82877	22.4904	24.1955	22.5717	26.4222		CHGA	72.5773	62.5157	99.7674	3.91697	19.5578	46.386	64.0386	97.0953
PCDHGC3	39.0658	52.9667	50.7165	5.38914	5.59837	17.6351	27.7247	94.396		AK1	56.6622	80.9334	88.5544	52.1042	65.0457	56.9483	52.3985	66.1375		CLDN5	8.78411	61.2909	21.4737	74.7871	98.9901	17.8211	23.0636	28.3669		CAP2	18.7558	20.538	38.9971	0.487462	12.2283	51.165	82.797	38.0824		AZIN1	43.7777	46.9189	82.2759	3.16776	8.85813	66.5854	87.3526	31.0698
PIK3R2	51.3446	97.5596	58.3903	2.2665	8.54559	28.552	28.8234	24.3603		AZIN1	88.3573	82.9347	80.302	7.57912	18.694	63.5583	81.8539	34.3873		FYN	85.8421	89.6743	48.05	11.8873	12.9136	33.0597	38.6982	42.5456		DGCR6L	14.8264	30.6734	21.6068	21.2229	87.4047	24.4756	18.5345	23.8145		CAP2	22.7644	20.4556	46.9021	1.40082	5.66913	42.2575	92.1126	36.5981
PPP3CB	42.2698	63.6951	82.1549	1.8377	9.39636	80.4426	77.6475	19.9673		AQP4	3.44715	2.80358	34.0284	19.2121	8.22304	18.4917	35.5367	91.5395		HSPA5	60.367	57.2503	73.914	10.0064	27.7589	53.7503	68.6606	80.8449		EGR1	2.96135	13.0878	69.0821	2.45041	19.6397	57.0129	84.7702	30.6344		DGCR6L	29.1496	39.0339	24.4296	22.7447	85.1089	39.9796	21.2465	22.4794
QKI	10.9654	12.0817	23.821	2.31174	3.53303	22.9046	52.9062	86.2875		GSTO1	17.1318	31.1876	30.5852	57.484	56.4822	92.8853	64.8698	68.2232		PPP2R2B	86.9554	82.9019	65.1615	13.2426	31.2417	52.3595	71.1747	50.5792		GABRA1	3.0817	2.44531	32.566	0.431582	4.46819	28.8324	81.638	27.6712		PIK3R2	82.0469	70.666	40.0976	2.22074	9.74179	26.2091	23.8848	18.3383
RASL10A	8.99191	17.9853	23.5187	10.8991	89.3804	36.6823	41.943	23.0905		CLDN5	9.17462	80.8097	22.8235	94.8079	24.1667	38.0619	28.6355	32.1415		SREBF2	40.4597	87.3789	29.2245	3.68675	11.8753	30.6336	39.7378	40.4698		NDUFV2	26.5286	34.2811	28.2627	42.9961	97.5952	41.065	38.3188	35.0884		PPP3CB	35.7013	40.4836	87.5177	3.05278	13.3702	69.2108	92.4376	24.1228
SPP1	6.29842	40.6608	23.8549	5.55097	35.4628	34.3202	75.8096	90.0131		CNTN1	57.3166	43.6211	92.1094	1.57994	3.10699	25.9607	54.7354	29.2995		CLDN11	0.157225	4.49943	2.35716	9.99942	35.1531	47.1365	51.0403	82.681		PENK	37.8702	82.2823	25.4252	1.7622	20.4609	10.6753	8.5425	3.74276		RASL10A	30.0122	83.1497	20.1518	7.68964	44.7084	29.0982	21.4577	18.9091
SYNGAP1	42.5129	31.9275	87.115	1.02228	4.44429	29.6705	44.4875	19.289		MOBP	0	0	40.8902	45.7791	20.2665	23.1321	50.4577	91.6058												PPP3CB	48.762	53.8192	49.9028	1.82026	16.8095	63.1798	81.7183	29.4175		AKT1	97.0384	48.7451	25.4284	3.06232	11.1051	24.1036	20.9538	24.2293
SYNGR1	11.106	16.9625	37.7901	1.57779	8.76378	41.2026	86.736	31.0978		MAL	0	0	11.8768	10.6277	40.8612	61.2998	60.4911	95.6205		PPP3CB	53.505	59.4756	62.6787	1.90961	15.7382	57.7552	68.3482	36.5777		TSPO	16.9283	90.2635	8.52413	11.6403	32.9793	14.7377	6.04976	11.4375		CLDN5	30.0986	96.3984	16.6721	40.5182	52.7161	43.8657	19.6869	32.0539
TSPO	20.606	91.1331	5.68977	16.2032	20.3903	9.87547	5.79854	13.5615		PPP2R2B	57.0866	68.8948	70.887	19.5981	34.7624	53.671	82.1704	46.9353		PCDHGC3	28.833	60.1875	30.2725	15.5526	11.7075	18.8863	34.3148	66.8639		FYN	93.9071	81.394	34.9254	4.48201	15.3765	29.1641	42.0018	43.2354		HSPA5	47.275	42.812	83.3289	7.47867	27.3842	37.2392	82.9296	68.589
APC	31.2281	32.6477	97.1129	4.32882	1.86666	22.3265	53.2858	40.255		SREBF2	51.0958	80.751	49.5996	6.25294	5.30168	34.8664	48.6327	38.5885		MAPT	46.971	72.8527	35.788	2.02714	9.48354	24.266	33.1695	27.8286		NDRG1	40.6867	61.1744	22.1046	0.655203	13.0943	49.565	29.4063	81.4606		PPP2R2B	99.2769	72.2496	69.2647	8.65805	35.3079	56.3023	73.0446	46.0992
SREBF2	50.5262	88.8186	48.8737	1.55685	4.77944	35.9016	54.3454	37.7153		CLDN11	0	10.3558	17.1621	13.1447	16.2621	38.9779	46.6064	89.1826		GABRA1	3.59446	3.71848	23.9897	0.377422	18.6509	23.1113	74.738	34.3788		PPP2R2B	86.7287	79.123	47.9277	8.54475	38.3175	53.2393	75.5496	50.6611		SYN2	11.8107	6.95984	41.701	0.771442	5.05851	42.8623	85.2332	33.3667
																				CAP2	16.0996	22.2215	31.5095	1.17211	12.9927	49.4918	66.3997	46.2384		LSM2	19.1246	35.0067	31.1012	20.8884	91.7492	17.7091	15.5316	14.0874		TMEM108	98.0971	78.0528	7.23611	1.56441	1.92848	2.91645	7.00531	5.90705
AKT1	53.223	61.9604	33.4542	3.95633	6.8026	20.811	21.3029	30.9168		CANX	56.2123	41.3372	71.0276	10.4718	11.8306	40.3159	59.9058	56.8813		ADRA2A	22.473	64.6781	6.46509	0.138929	1.98772	4.62573	4.62126	4.1223		PMP22	3.95406	5.50131	10.0555	4.50129	14.5918	72.1937	39.827	81.4874		PIP5K2B	95.8322	20.1806	58.2471	1.22292	6.68972	33.5355	53.7748	36.3596
CANX	45.3474	56.5026	62.8817	5.6148	4.2822	42.633	58.4937	56.7847		CHRM1	10.2158	23.0209	66.1816	3.12465	8.80832	66.5957	43.5181	32.4261		AGPAT1	30.3784	74.5067	49.3137	12.9438	27.8708	44.4332	40.6927	39.242		OMG	3.67393	4.52228	26.8593	13.9796	34.0691	91.7096	51.5813	55.7613		PMP22	1.75726	4.61691	7.94718	3.77942	16.9396	16.5572	34.9743	80.4672
CDK5	16.4489	35.7215	33.9968	14.5662	72.9419	45.3245	32.8317	18.1285		ESD	46.4348	69.9612	27.5101	24.6479	29.8678	27.3925	32.3885	25.1656		VGF	10.9422	26.3059	71.0172	3.89066	50.7678	37.3556	41.5648	68.1985
CHRM1	9.13735	17.3534	66.3848	0.804762	20.7873	76.3326	46.4425	19.898		FYN	60.1099	78.2842	62.705	17.1176	15.8688	26.4598	41.8562	42.9521		AKT1	40.9144	63.1496	24.8062	7.77721	12.329	17.1078	21.7338	28.7209		SYNGR1	8.304	9.88739	47.0142	1.6331	16.5251	27.1703	64.1158	38.364		SYNGAP1	65.8709	19.2263	42.3889	0.843269	3.84463	12.9699	26.7119	14.8927
CLDN5	15.8297	79.0949	38.1332	57.1576	47.8522	26.362	37.7017	44.4359		GABRA5	9.45184	15.9916	78.842	4.45625	14.4619	44.6498	48.0003	17.2443		CANX	57.3263	55.552	40.4336	11.1703	12.1323	42.6556	63.4059	65.9645		PIK3R2	47.3966	73.8072	48.1989	1.4155	16.0184	20.3589	28.8853	20.7382		EGR1	4.80288	12.6876	27.4576	2.52728	5.00593	34.3106	66.7097	35.2467
CNTN1	28.0184	50.9115	76.6217	0.781982	1.40223	30.1281	62.5377	26.6995		GRIA2	57.7193	14.4609	76.3175	3.08401	5.37717	22.6537	66.0862	29.2848		CDK5	24.2893	36.0958	45.48	13.7049	61.3567	34.967	31.408	26.7714		PCDHGC3	39.3487	42.1631	40.9049	4.55515	10.9053	15.0756	28.1833	66.6499		FKBP1A	41.4978	52.666	35.5553	6.35959	28.0051	64.3458	59.676	31.4359
ESD	36.5618	67.5905	21.1502	20.3839	35.8673	28.7643	27.794	20.5004		HK1	36.6965	51.0949	63.5283	4.0204	10.9551	39.3602	44.115	40.2093		ESD	68.1912	59.6512	39.0985	21.492	38.1234	30.4862	37.882	26.8535		L1CAM	66.9674	65.7948	37.6388	0.210189	5.66998	14.7198	32.8305	18.0187		PCDHGC3	64.2509	34.4008	26.7855	4.57272	7.88638	16.1883	23.2766	65.7469
FYN	74.4468	78.209	56.0103	5.53716	8.96181	27.5584	41.6015	46.2286		HSPA5	43.2033	56.3732	75.6505	12.3474	33.2917	46.2681	70.5196	77.2724		GABRA5	12.6269	16.7583	74.2869	2.04302	10.7064	41.8613	62.3738	18.9674		MAPT	66.04	38.8834	53.6342	1.36644	8.03663	22.6777	46.6546	27.2392		AGPAT1	66.0759	74.7174	43.0354	7.38766	19.7495	33.5661	42.9127	39.734
GABRA5	4.71499	8.61285	76.2376	1.39565	8.22639	45.4199	45.4018	20.0064		MAPK8IP2	19.4916	67.2665	51.6439	7.30609	16.4867	56.175	50.1657	51.5218		GRM3	30.6556	43.3439	28.373	26.0626	17.5383	32.2379	49.3284	61.1178		FKBP1A	33.3843	65.1166	56.3014	5.01969	53.628	55.8163	51.3429	34.8452		ATP2B2	27.5577	6.34704	32.2721	0.999134	1.85974	22.6426	62.4626	26.5803
GRIA2	36.3277	15.7327	48.5393	2.33967	2.33303	29.4893	69.2694	28.6593		NDRG1	32.9488	75.2374	32.4275	2.54184	5.90528	24.8111	30.6662	60.1988		MOBP	0	0.106233	5.84238	37.7743	65.2222	45.8385	73.087	78.0296		CSNK1E	64.9469	71.9924	24.882	2.30206	9.47179	14.681	20.0969	20.2619		GABBR1	67.7908	50.3248	69.5687	9.38124	18.2729	66.8074	79.4656	71.5454
GRM3	26.744	41.6118	28.8818	13.0936	9.90096	32.9848	48.3543	64.4628		PAFAH1B1	69.2461	41.1286	69.0776	2.57242	8.79434	35.3387	62.7764	33.6766		NDRG1	30.0001	65.3756	17.6503	1.21013	11.8572	25.7752	30.8838	61.3843		AGPAT1	36.3047	66.2437	69.0142	7.18183	32.0711	37.9573	46.4958	42.6832		CNTN1	19.8906	11.8934	55.6212	1.26591	1.37379	18.9336	62.1269	28.6167
HK1	39.0923	49.9276	62.1586	1.11034	6.43945	49.3865	50.8939	30.9279		PPP1R1B	33.4428	54.6244	18.5056	31.9182	25.0801	37.1911	30.1419	75.8221		PPP1R1B	30.5138	27.2061	21.3463	26.1463	42.6918	33.909	32.7004	69.6059		APC	43.9538	19.1953	58.2883	4.01353	1.88277	25.4143	61.7857	29.4802		ESD	25.9864	65.9656	36.9132	20.183	43.0464	30.76	42.0917	26.7656
HSPA5	34.8581	55.8754	66.6311	6.72997	17.1588	51.5546	69.7234	45.9265		SHISA5	18.9342	64.8676	22.8267	16.4494	20.7538	37.3008	29.9739	32.8058		SHISA5	21.2965	61.2697	22.967	10.8874	28.4803	28.5405	28.7929	29.7202		CANX	61.4288	38.5061	30.2392	4.18405	5.71706	49.51	62.1146	63.104		FYN	71.5444	61.9738	47.6126	5.76455	9.91346	17.5776	36.3232	39.7184
MAG	0.07439	0.409644	19.6362	15.2708	54.683	39.8953	76.8251	62.7193		SYN2	10.2281	13.9332	55.5514	0.905291	7.25066	63.8417	65.8467	32.2455		SYN2	10.0697	15.6694	42.532	0.618999	9.81048	58.2332	68.0625	40.5957		CHRM1	9.73522	17.3372	68.2108	0.475456	42.8206	50.6719	43.0048	29.7616		GABRA5	20.1706	19.0071	71.3284	2.21677	12.9705	46.3289	47.554	16.945
MAL	0	0.299625	6.02395	3.29219	55.699	33.4933	73.692	70.9705		TMEM108	32.0352	73.3647	12.5462	3.88446	2.56422	4.52588	7.41875	5.86159		PIP5K2B	61.4734	76.2515	48.718	3.9102	10.0885	33.2435	57.1034	46.7631		CNTN1	34.3064	29.4785	34.5476	0.890513	1.50982	27.0896	62.2895	32.7751		GRM3	53.1285	41.0238	27.7651	16.7148	18.6529	20.435	48.8949	64.6028
MAPK8IP2	35.8552	61.5374	62.5179	2.51158	26.016	55.8121	66.153	60.6314		PIP5K2B	77.075	53.7578	76.3269	4.62444	8.49063	36.9495	64.2082	41.7272		RBP1	24.9901	40.2179	21.3183	45.6908	68.3651	16.3138	13.1598	26.0487		ESD	50.1529	70.2746	20.9937	15.4248	47.0705	28.5778	31.3461	22.8144		HK1	63.3223	38.9708	42.1832	1.10431	5.88075	24.8441	43.9751	32.282
MLC1	3.52529	7.68451	19.9126	13.5469	5.46767	11.1927	7.71714	76.9923		BAT1	72.7742	67.2098	35.452	15.9613	21.3327	23.5566	26.6011	26.92		KCNJ10	1.30727	3.17806	3.73591	3.39919	5.09726	15.5094	28.8639	62.6654		GABRA5	5.22081	8.6587	72.415	1.24833	21.6314	34.063	52.0926	15.8909		MAPK8IP2	65.5458	55.4944	37.861	1.78223	21.3688	43.1448	44.5117	42.3489
MOBP	0.127787	0	27.2001	10.7537	35.632	13.7882	57.7039	68.4643		EGR1	2.12311	18.0085	55.5917	9.53763	9.51103	72.4441	69.9448	37.9492		MSRB2	9.14698	12.9004	19.0249	24.9331	64.7837	23.9586	22.1267	16.7968		GRIA2	47.0156	11.5311	29.545	1.78253	2.79917	25.3237	68.8605	31.6944		NDRG1	75.9135	50.1451	17.5066	0.442557	7.91307	17.6881	27.8464	76.0241
NDRG1	45.5396	78.1918	35.779	0.738261	5.49073	21.3599	37.8225	36.7409		FKBP1A	23.6128	69.8352	34.5046	14.0719	24.3224	76.1084	56.1604	34.7295		OMG	5.22716	4.1352	32.4482	22.0729	33.191	51.7841	70.2225	50.4584		GRM3	32.6502	45.0431	25.669	14.3472	19.0976	46.504	48.4516	70.294		PAFAH1B1	42.2	14.4294	54.9786	1.89007	4.79573	25.079	74.1932	31.939
NTRK2	6.44268	15.1214	24.8123	2.45714	1.93249	14.6421	35.8002	60.7024		MAPT	59.8297	58.6737	79.6925	2.54029	4.45566	22.7734	41.1839	25.5773		PMP22	2.29563	6.54144	8.70351	8.26944	21.3205	35.1306	47.95	61.9787		HSPA5	50.4033	50.3422	48.5872	6.11863	26.1735	58.3567	67.9545	73.4357		SHISA5	60.875	67.9967	17.4604	7.6878	24.6369	33.1938	30.4095	32.7542
PAFAH1B1	38.6555	57.8165	55.9747	2.54344	4.41644	42.503	64.1747	21.6112		NDUFV2	22.7596	31.7077	36.5148	64.4276	66.1497	44.2451	48.5394	38.5782		PLLP	0.744265	3.01123	4.19268	10.8625	66.6611	30.8013	33.9332	45.7768		MAPK8IP2	25.5569	47.2827	71.1904	1.53522	48.7996	38.0201	57.5396	47.5423		SREBF2	78.7961	50.7662	28.0857	1.59109	5.77051	24.9342	40.8502	39.1212
PHGDH	3.29335	6.18821	16.4127	16.6417	17.3928	18.4059	14.4223	61.3669		QKI	11.4185	8.12156	25.1792	6.71896	5.19675	31.646	48.9223	76.5575												PHGDH	7.78232	9.73443	17.2818	11.1211	26.423	34.0158	15.4694	62.5634		CAPZA2	21.7607	42.2086	75.383	20.2953	65.5656	65.847	75.433	18.2129
PPP1R1B	46.9218	45.5358	19.8107	16.5465	29.6931	37.991	24.5028	73.5695		SYNGR1	7.05115	15.0641	41.5154	3.6337	4.99233	36.1137	68.049	37.0583		TMEM108	31.2011	55.7616	9.40508	3.64498	3.92751	5.81776	6.70003	7.50382		SYN2	9.95975	9.92447	54.162	0.423661	12.8632	48.0201	76.2094	33.7178		DDR1	61.5571	36.0688	11.6335	2.94271	5.24031	7.23452	10.9092	36.3115
PPP2R2B	65.5692	71.2189	67.7615	7.84912	24.6078	57.322	73.4802	52.5809		CHL1	76.4479	31.4327	37.5524	1.1713	1.03856	9.10323	35.2836	13.8584		NTRK2	4.00399	10.5676	8.12688	3.31006	6.67858	13.101	36.9777	52.3		TMEM108	39.5218	60.8075	11.1727	1.41465	7.59568	5.02589	6.10995	7.26393		KCNJ10	0.587729	0.390944	4.25902	1.08143	1.73465	10.7533	18.1295	75.187
SHISA5	21.4791	61.9965	25.9628	8.45548	21.8403	39.0589	34.2709	29.5695		OMG	4.75314	4.12029	28.6901	23.7628	30.2432	47.5556	62.3756	48.0526		PAFAH1B1	53.7704	57.5998	32.3943	3.33982	13.2396	33.8602	59.7981	41.2387		PIP5K2B	73.3409	37.4106	41.174	1.5288	5.88728	29.7959	66.6628	48.5064		OMG	8.00585	11.7329	36.2366	16.8977	27.6357	42.792	76.565	65.328
SYN2	8.87972	12.4396	51.0247	0.528677	4.96645	67.397	67.3254	29.9821		PMP22	2.28699	8.62212	8.99805	9.313	9.40561	23.5252	36.0295	65.0479		PHGDH	4.43727	12.6315	13.8062	26.2007	33.5121	24.6647	20.3316	49.956		RPP21	18.3515	31.6531	20.9772	14.1049	60.4203	11.6758	16.2662	14.5786		NTNG2	60.6421	67.7833	23.9265	2.18813	11.9343	23.4827	14.4226	21.2623
TMEM108	46.5536	68.7021	11.4211	2.19426	2.75313	6.41702	9.96371	8.46536		SAT1	17.6494	17.461	19.1233	63.6244	38.0772	16.1596	25.9987	25.8857		MLC1	2.53507	14.077	19.2053	25.3788	11.4698	15.6316	19.3974	48.4286		GSN	1.86444	3.84396	13.9098	3.77935	14.023	43.708	27.2103	62.6588		PLLP	1.77315	3.09412	5.40627	13.0187	47.6553	24.7916	31.4717	68.6763
PIP5K2B	71.6825	77.8237	76.9548	1.942	3.48228	39.5238	69.9458	47.9463												MAPK8IP2	20.8384	57.3315	42.5317	3.55397	38.4022	39.1953	45.05	52.6505		KCNJ10	2.23611	1.21023	7.2644	1.10321	2.43649	25.1759	17.0359	72.0936		PPP3R1	8.82225	7.83228	38.8902	1.14369	7.51468	26.0768	61.0618	16.0645
ADRA2A	34.429	64.0038	10.4069	0.068186	0.794709	5.40902	8.55852	1.75407		AHCY	11.2053	46.8429	22.7593	9.28127	11.4951	21.0281	17.6914	16.3132		CNTN1	47.5536	53.3689	36.1807	1.76588	7.8907	23.4877	55.2264	38.0051		MOG	0.053721	0.139976	7.53471	2.51284	42.2135	57.8031	37.293	64.5359		NR4A2	61.8155	50.5729	8.50406	0.166246	0.517395	3.94573	8.8316	7.47621
AGPAT1	38.8078	75.9559	58.7692	7.97215	20.353	52.5455	56.5441	35.9358		BAT2	30.7826	41.9893	40.7436	4.87923	5.81438	21.8304	27.5345	29.1763		HK1	48.6219	54.0085	49.6483	1.94061	14.2088	37.2468	36.8105	42.6751		MSRB2	9.5199	10.5219	21.8175	17.5631	69.1856	21.199	16.7645	22.2457		TTR	0.235991	0.082477	61.1919	3.71581	37.3056	0.505576	1.31066	16.2455
PENK	25.6633	68.8874	67.3556	2.1257	11.8344	15.0175	4.97706	5.0453		CAPZA2	36.5498	46.4037	45.9724	20.2744	38.5353	52.7954	58.5602	22.4862		GRIA2	35.5777	25.3633	33.5842	3.45152	8.52774	26.5366	55.9332	38.2235		PIP5K2A	11.7428	8.44459	6.682	0.214596	2.41436	38.8624	34.5727	66.5346
										CDC42SE2	15.1178	23.093	46.2191	2.48782	10.0939	45.4719	53.9357	19.6205		CHRM1	9.04651	17.2559	45.2216	0.753755	20.3812	51.1138	26.6027	33.9582		PTPRZ1	73.382	31.0102	16.4823	4.67079	3.10661	5.04366	17.0503	32.1466		PHGDH	4.88958	9.45128	11.7154	13.5416	20.1126	25.0628	12.8038	56.4814
AHCY	13.1135	43.3354	30.0716	6.03465	19.8815	21.6125	16.1499	10.2198		CNR1	42.5465	25.5675	30.0494	0.131208	0.920817	9.21342	24.0531	7.59655		SYNGAP1	33.1854	36.8649	48.4154	1.49344	6.27413	24.2033	29.8821	20.8946		MRPL38	11.2366	29.6221	30.065	8.39033	69.4293	23.8147	23.3691	18.0872		PPP1R1B	35.9883	29.3691	19.8	17.0911	59.2168	40.9077	25.1667	55.3289
BAT2	46.3687	40.0382	46.5744	2.17617	5.10377	23.0443	35.9131	34.4572		COMT	12.2164	42.4011	23.82	43.6305	28.7012	32.2031	22.2592	43.0802		SYNGR1	5.38246	21.1043	20.7256	1.98264	16.7459	29.3408	46.1323	39.4776		PLLP	0.961783	3.59333	8.46932	7.43378	67.8026	71.8879	28.5604	67.7424		NTRK2	12.4231	3.72991	15.5132	2.5068	2.74978	11.6826	35.3559	48.7895
CAPZA2	22.8413	47.8593	33.9081	13.7636	30.9764	55.7962	35.7382	15.8131		CTNNA2	21.5802	19.9749	53.2674	5.7645	9.5345	24.507	36.8698	23.6144		TSPO	10.5168	58.4586	3.86841	13.9038	43.0471	8.33285	6.56006	10.0207												MLC1	3.82981	4.13366	16.3036	13.1619	8.78297	14.6756	8.92034	52.8348
CDC42SE2	11.4458	24.857	36.5765	0.973564	3.2524	46.3729	46.8022	17.0572		DDR1	24.588	41.5939	18.8725	11.3982	5.2021	9.52882	12.4298	32.9881		EGR1	1.74585	11.9013	27.7275	5.14848	24.4262	43.3262	34.2219	33.386		PPP1R1B	40.9663	50.7826	14.5321	17.7611	48.9581	31.7476	29.1774	59.7338		GRIA2	30.1897	8.24677	51.7676	2.00015	2.25028	15.1051	58.9199	24.1815
CHL1	41.2763	48.2496	24.9917	1.14335	0.609378	12.0873	37.6227	10.9419		DGCR6	2.87103	15.2665	23.7982	22.1795	20.465	30.7927	20.3651	18.2386		FKBP1A	30.2174	59.2582	37.9709	6.23824	32.0364	58.1399	49.1941	41.9631		SHISA5	25.1048	59.5853	40.5418	8.97475	34.8983	27.772	26.8805	32.7992		CANX	32.2792	22.5715	55.9053	4.36633	5.81784	37.9324	57.1476	53.2361
CLDN11	0.303759	10.9957	10.6068	5.72754	12.791	27.6216	52.3754	53.4205		DLGAP1	16.6256	16.5144	47.6517	1.03384	3.73625	22.5122	55.0553	19.7763		ATP2B2	10.1249	19.7225	23.5144	1.52212	16.6992	30.5806	43.3449	43.287		SREBF2	46.923	55.3119	40.8863	1.66127	11.2692	27.9247	50.0264	41.9544		CDK5	24.2591	43.7693	41.9731	15.1639	58.876	38.7596	40.7829	23.1152
CNR1	39.5454	43.0473	23.5457	0.311366	0.385653	10.6951	22.3633	9.20302		DUSP6	3.80044	12.6361	31.26	7.26332	5.59952	26.1035	38.6096	21.8983		APC	43.7028	34.3189	52.6151	8.34188	7.53919	31.8587	59.646	30.8687		MLC1	7.21335	7.25023	25.8137	13.6859	12.3831	10.3446	9.28679	52.1647		CHRM1	25.3485	16.6252	39.7388	0.866742	10.1239	36.1486	40.2838	29.7623
COMT	14.4414	31.5104	27.1427	27.0555	30.8232	29.2219	19.7463	47.886		EGR3	1.91183	4.45981	34.7042	1.18062	3.04359	23.5946	46.0835	14.986		BAT2	27.4509	47.4779	26.354	3.30909	11.6995	22.0941	23.8508	29.8076		NTRK2	9.97379	4.43314	14.4441	1.83239	2.09282	11.5674	29.8685	49.6963		SYNGR1	19.7093	8.85101	19.0451	1.03103	7.80266	20.5292	54.2408	32.9104
CTNNA2	15.9216	18.0556	50.0426	1.9181	3.34007	28.0312	42.6335	26.3848		FGFR3	0.87861	1.61085	4.38541	7.37803	2.63929	4.53444	4.34353	27.3541		CAPZA2	37.0445	44.3439	40.3531	16.0857	35.565	36.8604	53.3642	25.7442		PAFAH1B1	56.2289	32.3194	31.6001	1.7667	5.24689	37.5343	59.175	37.2289		PENK	6.60596	14.2253	30.9465	1.45202	57.4465	12.5901	8.66699	2.02848
DDR1	34.6537	40.8679	18.9355	4.26129	4.88666	7.41849	14.4541	35.9144		GABRB2	7.37279	3.29846	26.9603	0.380281	0.730308	6.65377	47.4697	7.9641		CDC42SE2	14.952	25.6666	17.8246	1.95489	6.90012	38.9857	48.5884	20.1897		HK1	42.3288	43.7829	36.7282	0.668072	11.5861	33.0553	51.503	34.6777		ADRA2A	44.469	45.6615	3.90251	0	0.627018	2.79909	3.95928	3.91237
DGCR6	4.52812	12.2949	21.018	19.5623	45.5154	27.44	25.4089	19.6557		GLS	11.1973	7.12991	29.1285	1.34718	3.13508	21.4513	41.5589	18.1715		CHL1	48.6154	50.9421	11.5699	1.63032	3.79592	9.15512	28.5953	17.8754		AKT1	53.494	52.1013	23.357	4.57388	11.2762	18.0622	23.8666	28.7985		VGF	10.8524	12.7948	45.3542	2.43043	18.1355	30.1986	53.886	53.7799
DLGAP1	17.5172	18.5428	44.837	0.996093	1.82445	29.7896	58.4672	16.767		GOT2	20.6771	45.2356	25.7621	2.25734	10.6121	44.2613	35.4969	30.9148		CNR1	24.3321	46.2114	9.83085	0.71215	2.28787	7.57418	18.7918	9.64302		SYNGAP1	32.2527	19.9392	56.3186	0.8405	8.13951	20.4368	40.8491	19.1928		AHCY	28.1343	40.5882	20.9049	8.06803	23.7625	21.0154	17.4075	16.8984
DUSP6	4.75204	15.1068	30.3937	1.90478	3.00039	28.0224	44.2061	15.4846		GRIA1	46.4878	26.0322	39.1836	0.741835	1.79784	10.0193	22.9251	13.631		COMT	15.2753	37.6839	30.4227	39.544	44.3195	28.2903	24.2673	40.3813		ADRA2A	23.5335	47.0008	14.2509	0.040284	2.59149	4.35295	7.16592	3.59268		BAT2	55.491	37.3923	24.9559	1.51918	4.97832	14.0936	22.0747	28.9604
EGR3	2.41735	4.52951	36.0304	0.244433	1.74178	25.9448	50.8349	13.0236		GSN	1.86093	7.12024	16.1111	10.8582	10.3313	20.8946	25.1076	54.8069		DDR1	22.8626	50.1293	16.2691	9.83443	9.61365	11.6056	16.3773	31.1086		BAT2	40.4011	34.0279	33.9836	1.90527	8.31474	18.7521	30.9617	30.5075		CDC42SE2	16.1591	11.2924	30.2347	1.5911	5.43797	43.6849	56.8543	23.9924
FGFR3	0.476652	0.752865	4.88882	2.23883	1.98646	2.62152	3.80535	44.6594		HOMER1	13.9929	5.10094	45.7236	2.21335	4.08138	18.3817	50.6904	18.3324		DGCR6	3.91643	11.2953	23.8636	15.5671	50.9393	24.4772	17.097	15.9393		CAPZA2	33.8266	47.8262	33.4726	19.0808	47.5613	45.4203	40.6358	18.7514		COMT	35.4497	41.2064	23.7401	22.2658	30.3615	31.7082	20.9447	43.2004
GABRB2	4.69794	6.64837	17.6002	0.278729	0.564382	10.3292	41.3057	6.95883		HSPA12A	10.8277	9.08058	38.6211	0.580319	1.51184	17.6313	42.6762	18.0019		GOT2	22.6726	43.8764	28.1264	1.26344	13.6494	40.1339	29.6138	34.6868		CDC42SE2	15.6298	15.7196	23.9681	0.494718	6.88576	46.7391	49.4626	28.2845		DLGAP1	29.3193	13.0176	30.3667	0.859211	2.26776	16.0205	50.1195	17.2665
GLS	7.23553	9.10225	20.7595	0.895764	1.22505	25.2596	51.2168	10.252		KCNJ10	1.11519	1.05955	6.16799	5.39251	2.21301	13.6902	22.0344	46.9039		GRIA1	39.4933	38.1151	20.8613	0.599164	2.33012	13.1898	23.873	14.6696		CHL1	52.2931	21.2816	10.3698	0.655768	0.252512	8.55017	36.945	14.8114		GLS	4.66393	2.82515	17.0529	1.10031	1.66365	18.4145	45.3006	14.1129
GOT2	20.0447	47.1355	28.0215	0.786631	8.13238	53.7296	37.1219	16.982		KLF6	31.5281	45.1195	15.6288	1.92006	0.959003	5.29327	8.30357	4.2831		GSN	1.24046	5.25567	7.1197	7.82473	27.0414	23.9832	28.0075	47.7054		CNR1	58.4491	20.2214	22.5488	0.238124	0.299174	9.45045	23.1369	10.9301		GOT2	23.4023	31.0909	28.3947	1.53043	9.59351	30.0299	44.8226	27.9124
GRIA1	42.3965	36.5747	36.6585	0.58674	0.857067	12.3247	26.2235	12.9155		LHPP	4.37201	9.00459	18.7553	19.5881	15.6755	21.1032	26.0295	36.8234		KLF6	23.7084	48.1758	6.88783	2.01282	1.41318	4.13698	6.63229	5.40612		COMT	16.4697	34.1292	31.0895	26.4718	45.9404	34.578	23.3251	47.0605		GRIA1	49.4244	13.6593	29.4767	0.585999	0.772433	7.13516	21.8457	10.9192
GSN	1.43884	6.54421	13.796	4.50701	10.838	16.2925	25.391	43.3681		LSM2	14.6079	33.9098	14.6031	22.2612	25.8352	15.95	16.1891	15.2525		LHPP	4.70642	6.52732	18.8513	12.6509	32.6267	20.6346	26.7561	33.5533		DDR1	39.0981	37.855	19.3437	3.87506	8.82378	16.4532	13.4688	40.0357		GSN	2.93428	5.19478	8.58275	3.83332	11.1413	16.5653	19.1241	56.0718
HOMER1	7.94962	8.03615	29.2174	1.96971	2.6557	19.1655	46.0309	12.6194		MOG	0.10829	0.089542	12.1715	8.34511	13.1868	15.6782	46.1007	52.0052		LSM2	18.0596	35.2364	17.6589	17.7329	52.2088	11.4163	15.8825	12.8797		DGCR6	3.379	12.6811	28.7667	16.4541	57.1562	23.7292	18.7208	16.6281		HOMER1	6.03567	4.18916	30.6804	2.04771	2.17979	16.701	46.0371	13.6686
HSPA12A	18.169	14.6453	37.9625	0.20965	1.17571	22.5601	53.5117	17.3911		MSRB2	7.20026	13.4446	11.8792	32.4237	31.3579	23.1668	19.9464	21.2601		MOG	0.077242	0.292656	1.38006	6.34397	46.5944	25.3359	53.7374	46.3221		DLGAP1	15.4722	10.3713	26.6723	0.516312	3.76555	21.4667	51.9733	20.4853		LSM2	32.4475	36.9616	17.5261	20.749	50.9945	19.8423	19.5935	14.9688
KCNJ10	0.865613	1.90835	5.35472	1.63785	1.05175	9.96553	17.9152	58.8439		NR1D1	5.87518	18.6877	26.7283	19.2848	12.3194	49.7914	18.8173	25.9658		NR1D1	7.37559	19.1698	26.631	11.3877	18.9342	41.8945	16.7541	26.3716		DUSP6	5.18118	8.59126	24.5846	3.02989	7.4559	22.91	40.5884	20.6648		MOG	0.061663	0.042224	6.13887	3.89265	39.2719	11.675	30.9489	59.4276
KLF6	38.5495	59.7414	18.2328	0.290051	0.541324	5.50264	7.59171	5.10962		PIK3R1	26.1048	17.1899	33.0566	1.69201	6.53412	26.1305	47.5651	22.7323		PIP5K2A	8.33176	9.64631	6.70681	1.33826	8.24939	23.149	46.3237	47.1011		EGR3	1.03124	2.27652	28.6266	0.130036	4.80025	17.2062	47.0686	14.5961		MSRB2	11.8758	12.2479	16.8288	19.5451	57.6659	28.6799	15.6681	24.7466
LHPP	6.93807	8.10251	20.0409	11.8449	28.0763	21.5814	25.4877	43.0237		PIP5K1C	9.43283	13.4684	42.0232	1.41846	2.97256	24.6593	39.915	21.8826		PRKCG	2.48942	3.70816	30.8822	0.415139	9.55062	47.0173	30.3483	25.0122		GLS	7.74907	6.48291	19.3091	0.894413	2.22541	19.8069	45.692	16.5359		PIK3R1	22.3829	11.0157	30.5543	1.08528	4.84588	18.3376	45.867	19.9596
LSM2	13.4061	30.6829	17.9634	27.8066	50.9351	16.39	13.5729	13.9842		PIP5K2A	9.2558	9.4633	14.9746	0.947727	4.11669	14.4678	36.3753	44.8173		PTPRZ1	42.7471	52.0793	12.2175	8.77501	4.37985	6.39293	25.0602	29.0613		GOT2	25.2426	40.7636	21.5857	0.671687	17.0211	40.5716	32.4849	31.9196		PIP5K2A	10.0215	4.40445	11.0258	0.414971	3.42571	9.17574	32.636	54.2031
MOG	0.155749	0.007661	4.76478	2.91765	24.2295	10.9253	41.4351	42.4308		PNOC	7.07127	14.8504	36.7105	5.20268	12.6441	13.6326	12.3877	6.23141		RPP21	15.8173	25.6956	15.1407	14.3167	50.7128	11.9561	12.6122	14.8733		GRIA1	44.0102	19.8327	18.5005	0.426644	1.06736	9.72289	26.3666	13.0276		PPP1R11	49.8056	37.121	37.8073	6.46021	19.4636	30.8411	34.0331	21.0931
MSRB2	9.74657	12.4783	16.526	24.1868	43.4685	21.1279	17.2606	28.2273		PPP1R11	23.4625	40.6661	36.2505	11.8929	14.1186	30.912	34.7507	23.2571		SAT1	18.2371	15.6441	17.3254	51.4171	48.723	14.8353	29.095	27.0506		HOMER1	11.1424	6.06863	12.8353	1.58023	1.61272	18.7948	47.3145	17.4576		RPP21	26.0418	40.4291	15.4164	14.925	37.9992	12.1007	14.1097	15.708
NR1D1	10.0059	16.9335	28.2279	10.1827	13.2904	56.6222	17.8549	28.5108		PRKCG	1.8991	4.19678	36.6237	1.57575	7.7733	46.9823	32.8888	26.0335		SLC1A6	23.1597	46.2066	37.7808	3.34036	9.96142	16.0454	9.54518	7.3368		HSPA12A	11.8312	7.71328	22.0735	0.285404	2.0938	16.5085	43.119	19.9503		RTN4R	27.8616	47.6572	13.3283	2.04421	12.3244	26.0674	24.1758	28.1131
OMG	4.02919	4.23311	22.8917	14.4056	18.8663	49.2882	51.9354	34.9384		PTPRZ1	48.0493	33.9374	24.6767	7.99104	4.66772	5.57894	15.6783	23.5426		SOD2	15.626	17.0171	21.4793	5.1056	10.4565	31.1081	43.2556	46.4498		LHPP	4.67185	6.83169	24.6197	8.98858	43.1694	23.1885	23.546	40.1554		SAT1	13.5187	19.931	24.2013	51.3727	50.9644	25.5042	21.2224	24.9032
PIK3R1	18.1908	25.3005	24.8425	0.841751	3.79466	29.3284	44.8358	14.99		RBP1	12.6973	28.6177	16.4127	43.3061	28.7032	22.0784	10.4848	29.291		SRD5A1	27.6766	43.96	16.0942	1.31756	4.23663	11.727	12.2107	7.43181		PIK3R1	25.0982	13.4275	12.4145	0.524974	6.40715	28.1338	45.0648	22.8949		SLC1A6	56.6757	59.2402	33.1309	2.62456	7.27715	16.1704	12.0191	6.86796
PIP5K1C	12.5819	14.5912	38.0775	0.288323	2.9173	24.6133	50.4263	20.1658		RPP21	11.2802	28.5038	8.64062	20.7144	18.3984	14.8535	14.4385	15.684		ST8SIA2	25.1919	52.0721	2.95208	0.099137	0.186901	0.584122	0.701787	0.209419		PIP5K1C	9.40426	7.97848	38.281	0.314738	7.45222	16.5125	40.5795	23.6728		SMARCA2	43.2165	17.1384	26.759	0.963597	2.38336	8.70924	19.8259	17.1341
PIP5K2A	12.4913	12.9047	10.1957	0.201186	1.89593	12.1132	41.2011	33.2422		RTN4R	7.14012	47.2873	25.1093	7.326	12.5763	59.4923	29.0452	28.9108		TIMM17A	39.0379	29.573	37.9538	5.44476	16.712	40.4318	38.9674	26.5204		RBP1	42.8739	43.8372	23.6165	43.9971	49.315	22.6375	11.2705	32.1755		SRD5A1	35.4771	40.2945	17.7864	0.798077	3.2294	10.8461	12.2751	4.9116
PMP22	1.73851	6.06686	8.71641	4.75937	8.30891	17.3376	37.5646	40.1572		SLC1A4	18.5008	31.3795	20.3726	6.25921	3.22698	13.2715	14.7463	28.6379		BRUNOL5	15.4076	41.9649	18.2511	0.585625	4.93257	12.0374	18.9651	11.7461		RTN4R	9.90109	34.608	41.5965	1.72664	52.6128	33.6347	32.9863	25.3263		TIMM17A	30.988	27.4997	44.6079	3.29583	18.6951	42.3701	53.5426	20.4923
PNOC	11.0591	12.5972	50.3786	1.89792	18.8262	12.4775	15.835	6.48045		SLC1A6	16.6619	50.7466	38.3833	5.9776	6.40855	20.1227	15.3183	7.99527		CARTPT	3.08106	1.36255	23.6946	1.03603	3.91741	9.02492	5.20529	56.7155		SAT1	23.0207	19.2041	16.0642	52.4091	32.7544	16.0736	24.9387	23.0514		BRUNOL5	50.1537	24.0796	16.4431	0.479635	3.47643	6.21705	20.5561	10.6705
PPP1R11	31.2654	37.4207	42.7127	5.18915	23.8733	35.063	46.1175	24.004		SMARCA2	38.6217	23.8869	39.3825	2.54154	5.21877	13.3554	24.5322	19.505		CLDN10	0.738351	1.93558	9.22744	42.7099	25.1386	7.85349	15.4861	24.8329		SLC1A6	16.8437	41.5966	36.9933	1.76877	18.4779	16.7132	14.9447	7.06349		CBS	45.6097	22.1328	7.13981	1.3842	1.44299	3.65545	4.74792	10.3323
PRKCG	2.20649	2.60503	38.4948	0.621633	10.1888	58.5569	39.9932	20.9862		SOD2	22.1466	13.3451	39.544	5.92376	7.44107	28.1697	49.6984	35.5708		MAP6	26.1115	30.4549	40.7589	5.85431	20.144	36.6799	31.8993	25.6777		SMARCA2	53.7301	22.822	15.9506	1.22251	2.5869	13.7198	26.7649	20.6357		EFNB2	52.5086	12.7999	12.8855	0.52763	0.529813	3.69294	12.7131	6.80319
PTPRZ1	34.8522	41.2362	21.1303	3.71909	1.7212	4.8906	14.2972	42.6108		SRD5A1	28.4309	50.0885	22.5502	1.34619	2.99892	13.315	17.2844	6.26906		MRPL38	9.88548	28.0756	18.2329	12.734	41.3206	20.9325	14.8376	17.0155		SOD2	21.4474	10.382	27.966	3.37559	9.24443	28.1304	45.0177	40.2091		EHMT2	45.0228	28.144	12.2812	0.673281	3.01562	7.94515	10.0208	12.7542
RBP1	25.5396	39.2545	21.0192	44.8155	31.7335	15.7538	11.1522	43.9465		ST8SIA2	32.7727	31.9925	5.18206	0.18438	0.054238	0.156256	0.50144	0.301745		MSRA	44.2618	29.7062	13.7504	4.54762	15.6106	13.2895	11.8134	10.2004		SRD5A1	22.9962	44.1652	18.8192	0.357628	4.12808	10.5362	16.8773	6.5528		FGF1	0.821324	0.100243	9.30325	2.48614	8.52885	11.0761	20.4225	50.7579
RPP21	20.3746	25.3032	13.4318	16.8744	40.884	14.4791	10.6265	13.7352		TIMM17A	33.757	38.5723	49.9669	5.85029	24.227	43.9074	49.8235	25.2697		NFIL3	41.8129	33.7582	7.12148	1.79485	7.23753	3.59461	10.1513	6.33495		TIMM17A	31.213	37.1811	43.5346	3.39858	36.0063	36.8849	42.356	24.5308		GABRG2	6.90101	6.03606	18.6482	0.84755	1.41266	12.2852	45.2422	15.0175
RTN4R	10.6968	29.9341	25.3315	2.54089	24.3528	50.7299	34.8013	19.8902		PI4KA	10.2474	12.3437	21.6581	1.2657	4.20449	29.2639	39.1793	28.5024		PCDH8	10.5992	41.5383	11.2515	0.419235	2.76321	12.881	7.68422	12.6448		PI4KA	10.5294	8.72427	15.1385	0.312222	5.30035	25.2595	40.528	28.3055		GRIK5	44.3499	29.5472	15.8617	1.22265	5.67293	11.6234	11.3851	11.459
SAT1	19.2944	22.0153	16.9812	50.7382	27.7704	14.9314	25.1454	35.9803		AKT1	39.7552	58.3535	28.9897	8.47197	9.53742	18.9661	22.9358	25.66		PPP3R1	12.2561	11.235	22.7445	2.16205	9.21508	26.8135	43.2403	25.9322		ARHGAP21	42.6425	13.416	15.1995	0.736654	1.55338	17.6051	24.8277	28.5587		NRXN1	40.3772	7.95426	21.8401	0.908417	0.472963	6.01105	22.0989	14.5647
SLC1A4	14.6381	32.5238	23.0725	2.53013	3.02479	12.9758	12.373	46.3433		CDK5	17.7462	40.3069	37.4735	25.4255	41.4531	44.3926	38.2506	29.0371		SNAPIN	10.878	21.2308	13.797	16.2993	40.0228	14.288	18.7037	16.1497		CARTPT	0.473586	1.11719	27.541	1.19515	9.09912	4.60639	10.5906	46.6562		NUMBL	43.842	41.5885	27.9155	1.01848	7.49854	12.1179	22.3243	14.4789
SLC1A6	16.5989	41.8697	37.545	2.75563	11.7525	23.3004	16.022	8.95695		GRM3	27.0852	40.054	27.5068	31.8709	16.7809	33.7577	49.3772	58.6994		UGT8	1.41142	1.84965	1.36354	2.646	11.9695	23.4502	49.5767	42.7393		CTNNA1	29.904	23.2216	13.8387	1.95136	7.14667	33.8131	21.8243	41.2715		SLC25A1	30.4117	40.3688	7.14548	3.35125	7.3973	6.09587	5.40184	10.5746
SMARCA2	40.6722	30.4725	34.4444	1.16772	1.82888	15.8631	28.4852	20.9622		MLC1	1.7324	8.26066	16.6545	32.091	7.04333	14.4597	12.0091	47.423		CNTN2	4.08961	6.3104	3.10059	0.33419	7.31507	19.123	25.5985	41.0551		DBP	3.01901	6.57749	30.8635	6.57854	49.3905	27.1437	11.8994	9.76361		SOX10	6.21943	3.88823	5.09092	1.9821	7.02266	6.36411	15.0248	41.8172
SOD2	18.9519	20.9293	37.6487	3.76746	4.09209	33.7035	55.392	38.0933		NTRK2	10.9667	7.69185	25.8144	3.53438	3.68196	13.5412	35.5421	38.0965												DYNC1I2	41.2048	32.2458	12.4644	5.22285	11.5816	19.9359	14.3802	19.1861		UGT8	0.369194	0.313747	5.3526	0.79237	4.45082	9.72459	33.1978	56.0663
SRD5A1	27.1495	51.075	24.1785	1.32415	2.17053	14.0616	17.0592	6.09916		PHGDH	3.31178	8.90748	12.1726	29.0786	18.1709	22.6763	14.5151	59.2246		PI4KA	9.63381	13.2757	14.844	0.752953	7.50032	26.1068	30.9571	34.8213		EFNB2	41.8442	17.3812	11.5683	0.236163	0	5.33297	12.4354	8.27894		WWC1	43.3497	22.7157	21.1145	0.770878	1.72979	5.51712	8.35861	9.72615
ST8SIA2	32.3117	49.08	4.66713	0.083025	0.114515	0.127294	0.687683	0.927368		PCDHGC3	29.6424	49.8529	41.6288	21.0505	4.84737	19.648	24.9199	58.4397		SMARCA2	38.6922	34.6984	24.3544	2.41741	4.47803	17.1472	20.6792	21.7364		FGF1	0.771935	0.498587	8.26232	1.47577	6.98268	31.9562	25.7389	56.8251		CNTN2	11.9028	2.78678	3.10587	0.12527	1.98975	5.73446	16.4755	54.0841
TIMM17A	29.7326	32.9855	50.9174	3.64828	12.309	52.1742	36.832	17.0937		RASL10A	4.26831	22.3802	23.7936	24.1163	21.2638	43.9758	28.1857	17.5818		SLC1A4	14.9564	28.4064	16.471	4.65231	4.85476	11.2539	16.45	30.5011		MAP4	26.3482	18.6499	16.7972	1.25648	6.86627	29.3836	23.3946	40.1941
PI4KA	9.76981	12.8811	19.6393	0.519376	3.88956	38.2293	45.9626	21.4045		ARHGAP21	42.0899	16.7084	30.4691	2.16595	3.53678	13.2992	25.3442	22.1036		RTN4R	7.41792	38.3739	19.5898	2.54089	26.6905	34.919	17.8886	26.5998		MAP6	26.3914	17.9855	40.2311	4.46087	23.9711	25.4741	32.8627	24.5709		PI4KA	16.5889	8.57701	12.4265	0.490256	3.01396	18.0475	37.6938	24.1017
										CARTPT	1.40075	2.20412	47.7968	13.3568	7.567	6.69779	14.2938	50.7159		PNOC	8.21633	12.7573	33.363	0.566052	24.233	10.7326	11.6369	5.19926		NFIL3	37.5387	41.1129	4.81619	1.64703	3.01514	4.47074	12.4041	5.77094		ST8SIA2	32.6322	12.9039	2.00178	0.088194	0.092953	0.186236	0.741687	0.221844
ABAT	13.3304	17.5208	34.3286	0.723393	1.80278	19.5988	33.3298	37.0193		CLDN10	0.602967	1.27545	5.53934	42.8242	15.984	9.98566	9.06071	23.9147		PPP1R11	29.3055	33.6894	37.3318	6.12836	25.2556	30.3847	26.8291	26.6678		NTNG2	3.97565	10.8401	42.8663	3.14114	19.859	16.3013	18.6284	16.6403		SOD2	16.3576	5.61026	30.6972	3.61097	5.78252	23.4588	39.8978	31.8623
ACP1	12.544	19.7568	24.5636	3.25306	13.5844	21.1154	29.3565	13.5741		FGF1	0.555506	0.984411	9.26553	7.00047	4.37187	12.1132	24.824	43.0905		PIK3R1	15.7577	21.2728	15.8196	1.48988	8.34908	21.9014	36.4253	28.0243		NUMBL	16.0365	32.135	50.1209	0.857591	27.1922	18.7229	25.7912	15.6391		SLC1A4	23.6957	17.3676	15.6054	1.82442	3.33374	7.63273	14.5227	29.3457
ACSL4	14.0695	23.0302	29.7906	0.714154	0.506938	10.921	22.1125	5.35955		GABRG2	9.70173	11.3475	22.9501	0.848642	3.82386	16.8103	40.8126	17.9515		PIP5K1C	7.82908	15.7386	19.7171	0.773714	7.02874	18.6997	25.0302	24.3042		PADI2	0.31233	0.299115	3.65339	0.318412	3.43812	26.2997	13.2714	42.0836		PRKCG	3.9045	4.44791	26.7843	0.410818	6.72446	26.3804	29.1305	21.1159
ALDH1A1	0.054215	0.789231	4.98451	9.07521	6.04954	10.4718	7.87268	24.5883		GAD1	11.427	8.71344	42.476	1.9773	5.81642	13.9521	27.6085	16.4019		HOMER1	8.51707	9.17256	14.0698	2.41921	4.82778	16.5821	37.0855	20.1592		PGAM1	2.9783	0.420383	39.1362	0.338311	46.0882	1.13873	21.4199	1.88429		PTPRZ1	29.0184	20.8501	15.8216	4.40475	4.14339	9.12116	15.0808	32.9492
ANK3	20.7813	11.0604	12.5809	0.508504	0.296766	8.7252	14.8671	7.0308		NRXN1	34.6126	20.7845	40.9958	1.07615	1.3832	9.61482	26.4381	13.1131		HSPA12A	9.01886	13.5358	11.2516	0.482748	6.72152	15.655	28.2375	25.398		PPP3R1	11.6753	10.1278	15.7865	0.839344	8.24546	30.1671	45.6604	20.2877		RBP1	22.8068	26.2806	14.786	24.0849	31.4755	19.5531	8.26967	17.0026
AP3B2	26.7744	23.2949	25.2861	1.02764	6.16146	21.236	25.4938	13.9264		NUMBL	14.2666	44.9151	39.5748	4.84232	6.53338	27.6316	27.0273	16.2289		DLGAP1	11.3002	18.2527	20.5263	1.17763	9.33053	20.0701	37.9611	23.9569		SNAPIN	13.4087	28.5882	15.6608	15.1863	45.4686	15.6494	15.8008	17.0874		PNOC	13.815	16.9151	26.5952	1.92272	14.2343	11.0279	7.80233	3.67407
AP3D1	19.0585	20.4266	24.7891	1.22999	1.97267	16.111	22.2549	17.4001		PLLP	0.627748	3.5148	9.87407	15.0839	20.8508	30.405	28.5121	46.5616		DUSP6	5.22049	10.3084	15.0418	4.90123	8.11953	22.5351	26.0234	20.7624		SOX10	2.82433	3.27022	12.4736	1.9166	14.3691	28.5226	25.1846	46.7225		PIP5K1C	21.9384	5.92534	22.8394	0.818368	4.51402	13.2069	29.7177	20.6242
AP3M2	7.15529	12.3092	16.5115	0.354705	1.6326	14.3917	23.2008	7.61336		PPP3R1	13.5948	9.58759	33.5683	2.03527	10.0072	31.875	50.4658	22.3016		EGR3	1.90602	5.49876	10.363	0.385637	5.37082	15.1982	25.9399	16.4983		TEX264	9.54835	17.0046	28.7093	10.8117	46.5675	21.9929	19.032	20.6054		NR1D1	20.3611	30.5244	23.9301	7.14918	13.1813	30.5259	15.7898	27.6107
APOL2	1.07733	1.51748	3.60244	1.29107	1.53539	12.7364	26.8062	11.9205												FGFR3	0.328699	1.40108	3.46541	4.87934	3.59299	2.84566	7.0982	28.5511		UGT8	0.794424	1.13451	4.08279	1.11706	2.8292	56.1624	37.1142	58.8174		HSPA12A	6.62188	1.3548	18.3067	0.498943	0.932345	10.5405	33.5157	16.6098
ARHGAP21	38.4805	18.51	23.2603	0.979186	1.38418	13.068	23.2546	19.6472		ABAT	15.4855	13.7069	33.4904	3.67415	2.91753	18.3101	34.3455	24.5992		GABRB2	2.46722	3.82963	4.32512	0.309702	6.53007	5.23845	31.2611	12.2543		TECR	8.05101	26.1797	19.6982	11.11	42.8653	29.0692	21.6831	34.8236		KLF6	22.5027	10.4767	9.69364	0.333021	0.472209	4.08262	5.51565	4.33444
ASTN1	12.816	15.3413	27.3723	0.74981	1.00154	9.34131	22.7783	16.2953		ACP1	18.1092	21.4531	22.9714	5.03051	17.1152	20.4456	29.2966	16.6187		GLS	8.30122	9.17744	10.4855	1.23889	8.80856	18.843	36.7252	23.0707		CNTN2	7.10267	3.08934	4.18775	0.138108	2.6228	38.4926	26.466	56.7448		LHPP	11.2848	9.52809	19.1717	7.80993	28.1107	18.5454	18.555	35.001
BLOC1S2	27.9985	25.1104	33.9994	4.39914	11.4956	17.9262	33.031	16.4417		ACSL4	22.6791	15.3343	36.5218	0.629577	1.48689	8.78869	23.4572	6.60373		CTNNA2	21.0472	19.3532	31.9207	4.60759	6.90643	25.2839	31.6931	25.3222												DUSP6	4.098	6.62429	12.9917	2.74293	3.71332	15.1072	39.9661	17.9773
BRUNOL5	25.6183	33.6208	30.938	0.361256	3.25693	13.5457	25.8139	12.1655		ALDH1A1	0.124119	0.489871	4.54546	17.9653	16.2798	13.4107	12.3819	25.5838		AHCY	14.2658	38.722	21.2658	6.76962	21.12	16.9775	13.3227	17.5008		ST8SIA2	29.9101	23.2871	3.83798	0.099446	0.749653	0.07733	1.14166	0.309985		EGR3	6.88482	4.0628	14.1585	0.256143	2.95847	18.1386	37.1765	11.4545
C1orf198	12.9673	15.8924	6.06095	0.891932	1.25088	8.23988	18.8787	25.6959		ANK3	25.7998	6.78739	15.8627	0.469585	0.728136	7.01575	15.2476	9.06643		PENK	12.7841	29.0126	38.8527	0.749104	12.2764	16.6505	6.03739	4.54057		SLC1A4	17.1533	21.0578	15.8734	2.70155	5.21447	10.3062	13.5802	32.5783		FGFR3	1.80046	1.35015	4.19771	2.43075	2.95778	4.51708	3.81645	29.1396
CARTPT	1.11543	2.37139	35.671	1.57949	6.32954	9.69176	11.9328	7.92997		AP3B2	20.741	27.0037	26.4554	3.20392	6.44858	19.7031	21.9141	18.2897		ABAT	12.0157	20.2978	20.7459	3.08939	5.63428	20.624	30.1764	28.949		PNOC	9.93826	13.1303	34.1657	0.77143	26.4442	7.73828	12.949	4.61316		GABRB2	3.26104	0.375036	14.5521	0.547546	0.192177	3.5707	34.6077	6.27945
CBS	21.2	19.4495	13.8173	2.0862	1.95963	5.00656	8.68564	16.0476		AP3D1	15.9645	18.6182	23.8265	2.24221	3.42995	14.9933	17.2022	16.693		ACP1	17.3771	19.8036	21.4388	2.88854	13.861	20.0649	32.2215	16.289		PPP1R11	36.4409	34.8454	28.5028	7.47991	26.1027	25.7575	33.6786	26.8911		CTNNA2	29.0851	18.1863	39.4253	2.30262	5.84658	21.5412	29.9555	22.5853
CCKBR	4.50049	8.80744	14.2263	0.282875	6.31023	19.0858	21.6474	11.8423		AP3M2	8.3725	8.72293	17.7669	1.09696	2.97496	12.7318	22.6354	9.93908		ACSL4	17.8148	22.1829	11.3347	0.932261	2.42015	6.43826	19.3153	9.15216		PRKCG	1.63465	2.49653	34.6954	0.572089	18.9566	35.4159	36.574	22.9712		DGCR6	8.46256	16.241	20.8327	12.8199	39.5785	26.3355	16.6299	17.1069
CHN2	19.5193	21.9175	15.5506	0.286288	1.10902	7.5584	9.89325	2.36477		APOL2	1.08727	1.25632	3.35534	1.83931	2.82205	10.6497	26.0638	15.3632		ALDH1A1	0.036533	0.384926	4.90346	12.7089	10.7146	13.333	15.5334	23.1239		NR1D1	8.20941	20.5562	31.5776	8.61629	19.34	39.8105	16.8673	24.3866		CHL1	33.113	10.6029	21.2847	1.06545	0.466602	6.90954	28.6368	11.817
CHRNA4	11.3622	14.0845	20.3688	0.286639	2.2185	11.3339	10.9902	8.67619		ASTN1	17.0627	12.6628	30.7741	1.32113	1.23405	7.11526	18.4789	11.6636		ANK3	21.6589	13.5598	5.87405	0.574232	3.0871	8.16555	12.3252	12.7349		KLF6	29.547	25.7165	8.53136	0.429898	0.412808	4.67139	9.00309	4.39756		CNR1	32.1731	9.47575	19.9339	0.633541	0.502809	6.74015	19.3018	5.40078
CLDN10	0.455317	1.34476	7.05287	36.4603	15.2289	6.58554	6.53561	28.8819		BLOC1S2	26.3881	25.1921	36.903	7.78511	15.4292	18.8295	35.9317	16.9347		AP3B2	22.1389	26.5188	22.7593	1.50547	7.92828	19.4227	15.2281	17.5162		FGFR3	0.351736	1.00679	7.7292	2.10199	4.74063	2.58861	4.10533	26.9016		ABAT	19.2758	5.97963	30.3766	1.39421	2.5909	17.5184	27.6181	23.7239
CREBL1	20.8791	22.0724	9.56895	1.75849	2.50775	6.03802	8.66923	10.1017		BRUNOL5	17.5356	36.4638	35.2875	1.90875	2.7378	13.9877	25.8977	10.2406		AP3D1	16.51	21.2712	16.0141	1.73771	3.86962	13.4363	15.3967	18.3323		GABRB2	4.2657	1.27219	11.6498	0.290023	0.272357	7.30304	38.515	10.381		ACP1	15.7291	18.0659	26.5469	2.34738	19.1434	25.3299	36.606	14.7413
CRY2	7.4539	12.6767	31.2934	0.39899	1.25298	21.3898	21.4736	11.8185		C1orf198	7.44436	13.4105	7.81719	2.31988	1.0966	11.349	14.6369	26.2624		ARHGAP21	35.4086	19.5072	18.9967	1.59917	3.99205	18.6482	24.8007	25.7688		CTNNA2	19.3613	14.1352	26.697	1.40172	6.78861	22.0023	36.719	22.8204		ACSL4	10.9773	5.53873	23.1722	0.836263	0.301246	6.5821	21.4982	5.55839
CSNK1D	23.4195	32.0629	23.8431	2.55384	3.74648	21.6104	28.8926	15.2987		CBS	19.0209	27.6449	12.1773	4.40795	2.24923	5.19396	5.91624	11.6749		BLOC1S2	28.1237	23.1395	29.5507	7.16112	21.6157	18.3239	35.1985	19.5207		AHCY	14.8936	34.9684	22.1018	6.36888	30.0717	18.3036	13.9188	16.8026		ALDH1A1	0	0.456726	10.1593	10.4522	18.5911	19.4629	11.423	22.3513
CTNNA1	17.3824	24.5464	14.9574	2.19673	3.90534	16.7686	20.2651	23.5892		CHN2	21.342	16.9536	17.9636	0.429694	1.97125	8.24995	11.2106	5.17103		C1orf198	5.11281	14.1756	3.78312	2.88886	5.64784	13.1968	17.232	27.7371		ABAT	16.0809	9.28975	28.564	1.65636	4.54898	14.4346	28.635	29.3024		AP3B2	38.7438	22.9293	19.9813	1.36236	4.21777	11.0206	18.7747	14.3026
DAAM1	20.8094	20.5704	7.68687	1.09844	0.28795	1.9426	4.48684	2.7832		CREBL1	14.2581	25.0078	10.6929	3.25502	2.28185	5.32264	9.34105	8.51827		CBS	19.0699	27.384	8.98608	3.89434	2.96366	4.86016	5.36074	12.6157		ACP1	17.8576	22.7695	18.0946	3.4599	19.0633	20.4195	30.6877	17.6247		AP3D1	31.9824	12.688	14.3814	0.710812	1.9285	7.9747	15.488	16.3074
DAAM2	0.97596	1.05564	5.57613	0.621757	1.49372	7.61462	15.0826	23.0887		CRY2	8.46335	11.0783	28.2997	0.931846	2.64558	18.3713	17.9373	12.0543		CREBL1	14.044	24.262	8.04382	1.96001	4.74944	5.53917	7.48611	7.33046		ACSL4	17.7568	12.3497	10.7908	0.258039	0.309519	8.44129	22.2873	7.64634		AP3M2	7.49493	5.12935	15.1498	0.397333	1.51803	8.78367	23.6942	9.74837
DBP	3.17328	6.94869	18.1948	8.28264	26.2056	32.035	15.3467	11.9683		CSNK1D	19.9968	29.4333	25.8563	3.71976	4.68615	19.6208	25.8121	20.2017		CSNK1D	19.6694	32.5227	16.4644	2.3339	7.32944	19.4391	22.3857	20.3427		ALDH1A1	0	0.159492	4.60792	9.46046	10.4243	13.262	9.44345	26.7339		APOL2	0.988002	0.851037	2.28481	1.03213	2.39902	4.89883	22.0265	11.0947
DGCR2	15.8181	22.8328	21.3475	0.892503	1.82839	18.0968	24.0953	18.3243		CTNNA1	18.21	21.9866	16.4462	4.82927	7.81612	19.6236	21.0964	33.0971		CTNNA1	19.0644	25.5824	13.6909	3.69348	9.36118	21.6801	23.9369	33.5701		ANK3	23.2046	4.59897	4.80171	0.305746	0.194259	9.20181	15.6798	11.5585		ARHGAP21	33.9626	14.3465	25.2383	0.931931	1.94109	7.87393	23.4032	26.0643
DTNBP1	7.85151	5.66356	9.89827	4.12504	13.9826	17.4797	14.5904	20.2057		DAAM1	26.1578	13.8589	9.4921	1.20573	0.798191	1.67826	4.90512	2.47428		DAAM2	0.738474	2.51541	3.93508	1.81859	4.43768	14.4615	20.566	24.853		AP3B2	21.8868	22.568	20.0646	0.983627	7.99962	14.7303	23.095	15.0148		BLOC1S2	21.3543	23.7633	39.0273	4.32217	18.8322	22.8861	34.6834	15.2978
DYNC1I2	31.8926	31.178	15.609	6.11405	6.28096	9.4354	14.4869	12.6088		DAAM2	0.928741	1.08202	6.26091	1.92166	1.66902	10.0188	15.136	26.708		DBP	1.95491	6.02302	15.1189	7.96476	27.7019	23.5314	8.47881	10.9982		AP3D1	17.2626	13.396	14.5421	0.992266	4.26659	12.3077	20.3619	17.3714		C1orf198	8.74193	6.20423	5.72084	1.17962	3.09634	9.84476	8.74428	34.7792
EFNB2	25.2426	30.3279	13.4098	0.057654	0.316844	6.47285	15.4044	8.54128		DBP	1.3509	5.85312	17.8082	13.2445	14.1617	38.6322	13.2098	11.1056		DGCR2	9.15312	28.2513	11.1656	1.40801	5.41272	13.7335	14.7953	20.1115		AP3M2	9.30031	8.90044	12.4097	0.387206	3.06639	11.5176	20.23	9.84205		CHRNA4	24.7031	7.27806	8.89696	0.224431	2.6829	5.35145	8.39477	6.75209
EGLN1	13.8246	24.7266	21.4171	0.573478	1.67052	17.1616	17.6047	15.3048		DGCR2	11.0714	21.6667	20.5168	2.24656	1.86742	17.7687	20.5305	17.7127		DYNC1I2	39.3345	29.5753	14.2882	7.7164	10.213	12.9522	16.134	16.9961		APOL2	1.41346	1.14522	2.6294	1.0335	4.17273	9.81905	22.8595	13.4473		CLDN10	0.297615	0.832037	7.27175	31.6431	26.3108	15.2869	10.5431	28.841
EHMT2	27.5413	26.5745	18.2832	1.13827	3.52311	11.5263	17.107	16.7041		DYNC1I2	36.5248	34.2639	16.8754	8.03289	10.0942	9.9187	16.663	17.6532		EFNB2	23.4968	32.7641	10.5625	0.651954	1.01729	4.98085	11.5559	8.02815		BLOC1S2	23.7158	23.6902	26.1464	4.40459	23.6129	16.8548	34.4097	18.6155		CREBL1	29.5452	24.5632	7.95892	1.74188	2.99434	2.91906	7.9005	8.45389
FAM19A5	8.35762	10.2501	23.4763	2.62416	7.34512	17.0326	26.0967	23.3214		EFNB2	29.0736	20.3723	16.5726	1.6416	0.429347	5.08006	12.1099	7.21726		EGLN1	9.79099	22.1887	10.0033	1.20577	2.9599	11.4254	17.6534	13.0137		BRUNOL5	19.9117	20.9968	32.2011	0.430488	6.10366	11.5715	28.4981	11.4159		CSNK1D	38.6089	20.0048	16.6332	1.08735	3.73885	11.9434	23.2072	16.8835
FGF1	0.175243	0.230252	9.45576	2.61266	4.74127	10.5267	20.045	33.3309		EGLN1	14.8539	21.9193	22.513	2.23438	2.51211	14.5113	17.653	13.3716		EHMT2	20.8708	28.6694	15.0322	2.14258	6.01881	10.6881	11.2379	13.4416		C1orf198	9.90875	9.29538	8.12515	0.666604	5.08029	22.5916	14.2764	34.736		CTNNA1	19.5767	17.7443	14.4273	1.91959	6.97702	17.335	22.8553	34.5575
FGF14	15.7053	20.4353	15.9718	0.538771	0.772081	8.20331	15.8784	5.40853		EHMT2	17.7279	27.9146	19.1268	3.60515	5.17099	11.314	13.2307	13.8017		FAM19A5	5.47529	12.6165	12.0664	4.01727	11.9457	11.2015	14.5537	22.4383		CHN2	25.0196	16.613	9.56957	0.110681	1.26474	9.96984	9.51432	5.97799		DAAM2	1.56492	0.532606	5.6271	0.66516	2.25793	7.70522	10.4857	32.9162
FN1	9.74281	27.6488	23.1087	1.68539	0.589092	6.06484	7.59823	13.9868		FAM19A5	4.75319	12.2704	20.407	6.57376	6.68587	19.4173	21.2786	19.7619		FGF1	0.784559	0.492176	3.62416	4.92279	7.8328	17.9642	38.9691	37.7394		CLDN10	1.26	1.82497	11.2473	33.2795	28.1533	8.16873	7.50353	24.7054		DBP	7.71608	15.9436	15.2924	6.36393	18.2249	21.6928	10.6088	10.8706
GABRA2	5.61085	10.1424	13.1099	1.79253	1.98736	15.9851	21.4163	22.2654		FN1	13.5471	28.9834	16.9397	3.87109	0.854588	5.3559	6.74888	9.96817		FN1	11.0922	22.8109	11.5811	3.44556	2.73575	4.70665	7.15468	11.7544		CREBL1	16.6551	22.535	10.0394	1.14562	5.10975	5.3559	9.38024	7.86929		DGCR2	27.376	12.5448	9.94928	0.81808	1.84827	9.22311	16.2026	18.2472
GABRG2	7.40555	13.3944	20.6149	0.296256	1.01907	22.5571	38.6097	8.50529		GABRA2	9.10459	6.94739	23.2177	5.24535	3.85878	13.7133	24.8046	15.0868		GABRA2	5.15281	7.34841	8.68469	4.73914	5.49268	11.9294	25.9671	20.5572		CRY2	7.90526	7.67748	22.7986	0.236933	4.11129	13.8894	20.3733	12.4953		DYNC1I2	37.1923	27.4362	16.5204	7.4371	10.692	11.6933	16.8869	19.0795
GAD1	11.4209	10.7172	35.984	0.368841	1.3603	16.6128	26.0654	20.9993		GAS2L1	2.93934	9.84079	16.2339	10.6393	9.10571	25.5599	18.392	23.2928		GABRG2	8.03157	11.4143	14.8377	0.714983	10.8626	18.0929	28.8681	21.2433		CSNK1D	22.0818	25.1452	28.4721	1.33548	8.94374	18.3585	23.6128	18.6624		GABRA2	5.18542	5.25677	16.4697	3.25802	3.18986	12.5467	25.7058	17.6765
GAS2L1	5.34774	6.92278	16.8273	3.68936	12.2826	20.8851	20.7334	25.8663		GRIK5	16.995	32.5456	23.4783	4.38475	5.71057	16.4014	12.0812	11.909		GAD1	11.3879	12.7465	30.6575	0.2367	8.05277	16.5584	25.4365	18.0023		DAAM1	25.044	10.0395	3.29134	1.03069	0.275979	1.85726	3.95222	2.87623		GAD1	12.1135	6.80474	30.7604	0.748086	3.13306	12.3782	26.7175	14.5678
GFRA2	9.83306	23.2422	15.3863	0.14323	1.81243	10.5187	15.82	5.28107		GRIN2A	1.20387	0.352374	30.004	0.620412	1.93106	11.1553	28.9887	7.82522		GAS2L1	2.4263	8.66102	11.7518	5.8758	15.6173	15.0142	14.2897	22.0159		DAAM2	1.338	0.829245	4.90744	0.428295	3.16648	24.0684	16.183	36.7068		GAS2L1	14.9446	15.5519	11.2144	3.51991	10.8226	16.7504	13.9005	20.3545
GRIK5	22.2988	27.7068	26.5179	1.26999	5.904	17.8353	15.119	14.7105		HS6ST3	2.16115	1.79408	15.3411	0.159803	0.433524	5.78549	22.5015	4.18364		GRIK5	16.5438	30.1439	19.7007	2.26273	8.08267	13.4297	11.1356	12.0704		DGCR2	13.9915	15.1582	20.4822	0.604028	6.2438	14.8512	17.7624	19.2946		GRIN2A	2.45188	0.473613	12.5218	0.81966	0.684226	4.62597	23.2125	6.32483
GRIN2A	0.803211	0.834467	23.766	0.504712	0.938505	15.3272	30.1804	5.11421		HTR2A	0.961492	0.726333	12.8645	0.301637	1.44133	14.0806	25.2723	7.56959		GRM7	16.9576	23.8375	7.67396	0.346625	0.92285	4.37942	3.20749	3.01166		EHMT2	23.5858	24.4522	15.4625	1.02721	6.38443	9.89245	16.2745	14.9745		HTR2A	0.659363	0.437828	5.60988	0.894819	0.832421	8.53476	26.7507	5.64085
GRM7	13.0429	21.0283	9.46684	0.259523	0.43718	5.27629	5.39714	1.92706		IGF2	0.494067	27.5243	12.1663	4.56319	0.339176	2.20683	2.18732	1.79851		INPP1	27.2897	17.6063	19.7889	12.569	20.7689	14.9157	21.9835	21.5		FAM19A5	10.0208	9.09673	33.9331	1.58306	20.1867	13.3128	24.0767	21.9324		INPP1	15.878	12.9853	20.204	9.01169	17.6293	10.9247	19.3791	22.2008
HS6ST3	4.0116	4.48399	12.4396	0.13454	0.38138	10.2493	24.3299	3.68182		INPP1	20.648	15.6115	18.5657	14.0913	14.018	11.9671	20.2788	22.6496		IPO5	25.861	27.4589	12.1089	2.87168	6.43248	16.2559	20.981	14.7615		GABRA2	5.7197	5.58878	16.529	2.37306	3.25976	12.955	23.6145	21.4266		IPO5	20.838	15.9249	15.806	1.99483	3.83627	15.2905	25.9684	12.6764
HTR2A	0.636018	1.3186	9.86328	0.606821	0.496648	19.1886	32.2568	4.45146		IPO5	23.0446	24.1573	18.4022	3.00882	5.38313	16.6846	24.4708	14.2628		KIF2A	22.7814	21.9705	11.8419	1.80776	2.29226	8.18981	16.3175	10.6805		GABRG2	9.86116	10.4186	17.884	0.362657	1.70778	17.1164	39.1015	16.8679		MAP4	15.7275	10.6302	21.5495	1.51018	6.82126	13.0434	21.1632	38.4398
IGF2	0.531936	31.2594	18.9785	2.84916	0.465633	1.81988	1.93517	1.38719		KIF2A	27.9499	16.9156	21.8353	1.28015	2.1095	7.94136	16.404	9.37426		LSAMP	9.0322	14.0293	7.7413	4.36093	6.72383	8.24573	20.2478	21.8936		GAD1	15.6128	9.671	25.2561	0.399506	3.34276	14.7055	24.1332	18.7364		MAP6	30.8678	16.4959	30.4974	4.91138	12.9308	14.0647	28.8503	23.8567
INPP1	19.265	15.4575	14.773	10.4125	14.5001	10.5503	18.9703	20.505		LSAMP	16.6909	6.46079	15.3508	4.95084	3.91349	7.14664	21.5477	15.896		MAP4	13.2855	23.0371	14.9994	3.62401	8.69113	22.3434	27.0558	31.4653		GAS2L1	2.81769	6.52801	26.2477	3.62799	23.999	14.5052	20.4315	21.0487		MRPL38	26.6565	36.4026	14.8871	10.2728	26.8103	26.6269	16.9287	16.8891
IPO5	19.1446	33.0791	16.1066	1.57787	2.426	20.7164	21.478	10.9267		MAP4	17.5251	24.3132	25.3784	5.27474	3.84241	17.8222	24.3777	30.4969		MPZL1	12.9822	25.8505	5.08315	3.73845	2.35116	3.50315	5.49257	4.80356		GRIK5	18.6739	24.5342	27.6709	1.40264	13.0465	11.891	14.9886	11.5003		MSRA	27.9515	36.2461	10.7723	3.17924	10.521	9.84567	11.5387	8.55669
KIF2A	18.4532	22.4273	16.388	0.572518	0.818373	8.25571	12.9192	8.9442		MAP6	33.6111	26.4998	36.6861	9.35129	13.0261	28.9429	32.404	25.6013		MYH9	8.22869	9.63344	11.856	1.57287	3.93478	9.59836	10.3687	20.3002		GRIN2A	1.48352	0.332357	12.2862	0.378254	1.31707	9.74081	26.4489	8.71519		NCOA7	3.11412	1.77859	12.6877	0.678398	1.11212	6.59402	24.8411	8.04689
LSAMP	10.1546	10.9795	16.1165	2.28847	3.24042	8.37641	21.1923	23.9381		MPZL1	17.5433	23.9284	9.44667	2.99609	1.46324	3.29953	6.55914	3.35442		NCOA7	4.10549	4.59931	7.55768	1.49179	3.44791	8.42624	24.9396	11.3929		HTR2A	1.04447	0.470687	8.34519	0.119146	1.74574	12.4968	30.3569	8.18918		NDEL1	16.0286	16.498	30.2592	1.21305	6.35729	21.2302	27.8779	14.128
MAP4	22.0059	35.6775	24.6207	1.46976	4.09346	15.9516	23.02	27.4732		MRPL38	7.46436	31.0488	20.935	20.4558	15.961	29.0656	18.8765	16.9086		NDEL1	22.7533	21.8461	28.9985	1.78451	6.6078	24.3926	27.8517	21.4331		INPP1	22.2782	17.2242	13.1633	7.9448	20.5106	19.1709	17.3919	22.6631		NFIL3	26.4666	36.8168	6.09831	1.48594	3.08746	3.91805	14.0399	5.73093
MAP6	35.8374	30.4095	35.7364	4.76526	13.8553	33.899	33.8782	27.2052		MSRA	20.114	21.1758	9.05551	5.09801	9.04462	10.7906	12.4316	11.2895		NQO2	7.58512	7.59947	18.2397	6.69154	31.9461	18.5995	11.0599	18.9589		IPO5	26.2619	24.9821	11.4872	1.868	3.30964	18.4903	21.6633	15.7145		NQO2	9.14176	9.80741	19.5248	5.82758	29.3844	23.6352	15.6589	17.2023
MDGA1	22.529	12.3276	4.66368	0.233491	0.289165	1.47511	3.68521	1.56441		MYH9	7.56292	7.17326	18.7065	2.81392	1.84381	10.3356	13.8564	20.258		NRXN1	22.832	28.855	13.878	0.701991	3.54759	9.24767	20.9781	19.1911		KIF2A	22.8414	15.4655	6.56628	0.789576	1.18736	9.72879	14.3333	10.9925		NR4A1	4.97706	18.1552	8.63155	4.98408	5.11369	11.4514	21.6567	17.9115
MPZL1	14.1188	29.1042	8.32105	1.96529	1.72824	4.84508	7.79055	5.92654		NCOA7	5.51558	3.54232	15.4256	0.742016	1.15277	8.04581	26.5309	9.00982		NTNG2	1.24677	7.62001	20.3221	5.60285	13.7143	15.3283	16.0611	17.7756		LSAMP	15.1379	3.83908	7.24763	2.62102	3.9588	8.13222	20.3591	20.9137		OLIG2	4.71017	8.54751	3.67383	2.09278	9.50984	6.87536	13.7846	30.3632
MRPL38	15.3098	27.9912	23.671	10.1885	35.6226	28.353	21.3512	17.9778		NDEL1	19.7036	21.6511	35.0841	2.11686	7.18169	23.3249	31.8949	20.335		NUMBL	14.1977	36.4855	26.7102	1.48302	12.9654	20.1042	18.1802	16.5986		MSRA	21.0853	26.7599	6.25133	2.95757	15.9847	9.15864	13.3479	9.06854		OPCML	29.1731	19.5293	27.2402	7.62765	5.15894	11.6231	22.7833	20.497
MSRA	21.4357	18.6186	8.35358	4.06434	12.5411	12.4525	10.8269	8.84516		NFIL3	33.2478	35.3556	5.79841	1.56779	2.42535	3.31237	10.5822	6.63922		OLIG2	1.77966	13.8163	4.69731	4.41748	13.4192	8.93266	17.7815	22.3532		NCOA7	5.05156	2.7453	7.04426	0.679319	0.41686	9.85313	24.3261	10.1077		PADI2	0.381837	0.199913	1.5678	0.481694	3.19755	6.33648	9.81923	35.0173
MYH9	8.57185	8.31179	22.591	0.575315	1.12868	10.9284	19.0436	18.0806		NQO2	8.43276	11.756	19.1793	10.0498	21.4714	21.5573	15.1501	21.5029		OPCML	20.6742	26.2356	24.205	6.69419	7.54323	15.141	21.0231	21.3978		NDEL1	21.1516	18.2498	17.6597	0.759427	6.53858	20.7778	29.5536	17.3602		PLCB1	3.31209	1.18743	16.2903	1.02097	0.975573	5.95318	26.2295	8.33664
NCOA7	4.03031	4.6912	10.1057	0.613155	0.537638	10.1127	24.7231	6.22148		NR4A1	3.08498	16.2796	18.4133	13.9164	4.99407	27.2141	27.7747	22.8891		PADI2	0.326686	0.494581	2.10615	1.3578	5.78176	14.3205	17.2837	29.7103		NQO2	7.65991	12.3896	12.149	5.17946	33.2334	17.291	13.9072	17.974		RBM9	38.5607	6.65437	16.1845	0.665671	1.85145	6.1167	15.6331	5.67262
NDEL1	17.966	21.5022	26.2867	0.729122	4.82788	25.0967	28.1736	13.673		NRXN3	3.82594	1.89677	21.7047	0.394691	0.977672	8.63359	17.8009	7.17969		PANX2	3.13914	6.03126	15.2539	1.73271	13.2943	9.92026	11.8271	20.1941		NR4A1	2.30737	8.22078	22.3388	4.47579	16.6715	20.5944	33.8687	20.0498		RELA	17.219	20.6938	5.91606	1.2483	3.05044	4.39001	6.05665	8.80617
NFIL3	27.8301	35.389	5.21378	1.52002	1.67345	3.94208	7.73503	4.67764		NTNG2	3.36527	17.2104	24.8624	7.5977	11.1484	25.6338	19.3675	16.4262		PEMT	6.29052	21.451	8.47531	8.31206	15.4121	5.17859	6.24867	9.08343		NRXN1	35.0137	14.2572	16.7179	0.243588	0.400751	9.35592	29.727	16.9489		RXRB	24.5093	14.1942	16.7074	2.60452	8.70623	6.83134	17.2628	11.0547
NQO2	8.13872	9.54974	18.8024	7.9792	29.7657	20.4004	15.3483	16.642		OLIG2	2.48593	12.8956	8.74322	7.42987	5.15841	9.70693	14.9381	23.158		PI4KB	14.6579	21.6256	11.8042	2.89398	7.76588	12.7318	14.6636	15.2165		OLIG2	2.60658	9.09592	14.177	1.58573	15.7394	18.5319	17.1681	30.6243		SEZ6L	39.9115	12.3331	13.0495	0.914689	0.775057	6.56843	19.7718	9.51534
NR4A1	3.32205	20.825	16.639	6.60579	5.48359	27.5842	31.9754	21.5021		OPCML	21.9747	32.4557	34.0551	6.49996	4.19604	15.793	26.2363	21.2841		PICALM	18.6622	22.7606	8.18751	1.32831	3.14112	11.8024	17.4608	16.9308		OPCML	23.2336	21.6624	22.2869	3.82266	5.91474	15.6251	22.6114	21.2192		SNAPIN	18.658	23.8159	12.9951	15.6911	39.4471	15.4009	18.1518	15.9738
NRXN1	25.7467	27.8334	37.9919	0.77469	0.760014	12.592	28.0353	14.7036		PADI2	0.334253	0.512473	4.53691	1.7757	2.47043	9.99533	12.8383	29.9906		RBM9	20.047	34.8662	10.2588	0.694257	4.77139	7.45699	14.6362	8.17758		PANX2	3.58483	5.23311	27.5168	1.45005	12.1828	8.43899	18.061	15.9182		STK24	12.606	12.8087	19.6869	1.14743	5.81284	17.9613	28.3538	13.8977
NRXN3	3.68365	2.93313	20.1685	0.306279	0.470905	10.6799	21.0946	5.9201		PANX2	3.27481	6.27542	21.6192	3.99535	5.17759	13.0603	20.798	17.7715		SEZ6L	17.6462	38.173	11.3086	0.975479	4.54357	10.458	18.586	12.0027		PCDH8	14.5227	20.66	16.5967	0.246697	3.31637	9.59692	20.0289	13.4496		STX7	22.6555	16.745	21.1841	1.70101	4.60442	19.5673	30.4098	15.2967
NTNG2	3.6732	9.80641	29.7405	3.49172	10.3154	21.1663	22.4814	20.4515		PEMT	4.92333	20.5696	7.13236	10.5873	5.70977	6.44984	8.37622	10.5409		SHANK3	2.3082	6.37042	17.113	1.52206	9.25919	13.2021	21.6288	21.6151		PLCB1	5.57943	2.06499	7.39435	1.01037	0.999637	9.43773	28.4226	10.2478		SYNJ1	3.48704	1.94963	10.6085	0.374473	0.257358	6.01438	21.0735	9.78559
NUMBL	23.5485	34.937	37.7415	0.950907	10.8051	26.8185	33.3621	16.9764		PI4KB	12.2193	20.4585	15.4991	3.20079	4.44303	12.0221	16.5487	14.3114		SLC1A1	15.3655	21.4318	12.2347	0.730845	2.28864	7.03485	10.721	8.64528		RBM9	32.4139	13.3264	16.0249	0.190113	2.35574	7.90711	13.9645	7.65831		TCF4	32.4186	8.02954	12.548	0.686	0.559023	4.74895	12.3474	10.1362
OLIG2	2.87127	10.2173	12.4368	1.98649	6.14555	7.24431	24.9243	25.4219		PICALM	21.4042	23.3684	12.4386	0.893675	1.90372	8.82739	16.6712	14.9921		SLC25A1	12.6359	33.3303	8.22868	8.04241	12.8528	7.8332	6.31414	11.1043		RXRB	15.9628	16.3763	22.1264	2.197	18.3194	12.8544	19.7931	10.7921		TEX264	18.9431	20.9932	19.5032	15.0801	29.9	19.4103	16.4559	16.5902
OPCML	21.0648	30.351	30.4816	4.26429	3.82482	18.0196	26.0617	18.2538		PLCB1	5.44279	2.21239	26.0639	1.31993	1.29139	8.89015	32.5943	10.1341		SOX10	2.43069	5.97113	4.74608	6.451	12.8654	13.9352	20.8507	34.602		SEZ6L	23.7972	15.0052	16.419	0.520345	2.07195	9.85073	24.1503	10.9212		TIMP3	2.84504	4.21639	8.53325	2.14866	1.37637	8.50094	6.79588	25.4435
PADI2	0.249053	0.584818	2.50687	0.400215	1.96872	8.4901	16.3376	27.2366		RBM9	32.1692	20.119	27.3141	1.25867	2.63357	8.29744	19.2248	7.35324		SRR	18.3683	24.7427	12.4833	4.93949	7.83322	9.45963	7.69857	7.94214		SHANK3	3.53624	2.93925	37.1941	0.668695	7.16421	10.2805	29.9129	22.2336		TSNAX	9.9139	7.73144	26.8822	2.03498	7.1715	22.0516	31.4882	14.1955
PANX2	6.42891	6.64522	23.5242	1.61643	6.99765	11.669	24.9777	18.9059		RELA	8.21534	24.9144	8.09851	4.30771	2.15363	5.50026	5.25775	9.07455		STK24	12.7858	16.9949	19.9566	1.24985	6.73061	19.2967	21.2397	17.1829		SLC25A1	14.4981	31.8743	11.9493	4.47424	13.7138	8.35543	8.0548	12.8886		TUBA8	2.43217	1.86753	9.16293	0.699002	11.1104	16.9575	22.036	15.5092
PCDH8	13.2153	25.0819	16.6902	0.19577	1.49449	16.3503	22.6744	12.6769		RXRB	11.211	17.7527	20.4086	4.5636	6.41468	11.5532	20.4067	10.5394		STX7	24.0735	32.497	13.1433	3.0378	4.93236	15.2552	25.7276	18.3686		SRR	18.0041	24.0908	11.0825	4.49759	8.33098	8.58419	7.29319	7.34227		TYROBP	1.57908	7.54635	4.46135	12.4214	25.706	10.295	8.67118	6.0664
PEMT	7.61996	20.4031	7.58095	7.9225	12.2157	6.1695	6.87518	6.98173		SEZ6L	21.1942	20.9447	25.8239	1.23964	1.01398	11.1798	23.6829	9.57383		SYNJ1	4.61716	5.3489	7.76733	0.445716	3.50517	10.2909	20.0097	15.1254		ST13	13.4814	21.1343	8.02817	2.42997	4.03932	15.4791	7.7994	17.9407		WFS1	6.45039	5.27311	6.30238	1.31169	2.93063	6.88833	7.68035	24.1187
PGAM1	4.19772	0.852017	32.5648	1.49958	1.73087	1.14705	35.1948	17.0032		SHANK3	4.47613	5.47245	30.5785	2.6071	2.35949	15.3801	26.8259	18.7693		TCF4	16.032	28.6917	4.2643	0.542801	2.2249	6.39542	13.3672	10.1534		STK24	15.1489	15.1339	12.3523	0.859129	4.99282	20.9167	23.0207	14.5704		ZNF365	3.49465	1.78765	7.61137	0.114984	1.57315	13.5906	34.7976	15.2916
PI4KB	14.1951	22.2773	15.8558	1.2427	4.59935	13.2678	19.1868	15.1435		SLC1A1	18.0671	21.2782	18.1558	0.656628	2.11371	8.12327	11.0019	7.51921		TEX264	8.53134	16.1209	19.98	15.5339	37.2164	20.7797	15.1892	18.3904		STX7	31.3446	26.685	11.3936	1.25389	4.37546	20.6086	23.114	18.092		SIGMAR1	36.6931	27.3552	10.4589	4.31822	8.05077	9.34784	11.0658	11.1039
PICALM	14.9126	25.466	12.2959	0.535594	0.828964	9.50676	16.0806	11.748		SLC25A1	10.9856	34.3935	6.82031	8.2895	6.28151	7.00078	6.0621	13.7878		TIMP3	1.44187	9.98675	7.50966	4.95716	3.73793	7.77915	12.9182	28.7158		SYNJ1	5.87024	2.97167	9.26668	0.194401	0.555181	10.0169	23.3258	11.3436		TECR	14.032	26.4566	14.2604	11.6858	23.2659	22.1266	28.4697	35.6387
PLCB1	3.95015	4.27036	19.8079	1.59416	0.760483	12.8317	30.8426	5.9002		SNAPIN	12.0267	23.0713	15.5433	23.7921	14.4768	17.4992	23.6029	16.727		TSNAX	9.89588	12.0216	14.7888	2.61729	7.09318	19.4454	24.6819	17.2009		TCF4	30.0474	11.6031	11.06	0.435028	0.456589	7.72073	13.7748	10.588		ARRB2	30.4971	20.7827	16.6213	3.53721	11.9175	11.3656	21.121	10.1333
PLLP	0.996171	3.71351	11.007	9.42518	36.5167	21.529	28.5501	23.6808		SOX10	2.10298	4.59907	11.1888	6.63143	4.40048	13.7003	20.2966	35.8635		TUBA8	3.45322	7.0128	10.9588	1.01402	18.0416	16.1489	15.7513	20.2032		TIMP3	5.46406	3.98821	11.3836	2.08819	1.6887	8.62242	11.7991	26.1025		EEF1E1	9.26104	15.1596	13.0822	5.50248	24.15	20.5144	22.4399	12.1292
PPP3R1	9.37192	12.1384	22.7657	1.08291	4.31437	34.6162	37.5578	13.9817		SRR	20.4661	25.1067	13.1609	6.91843	5.77776	8.49625	8.19854	7.37552		TYROBP	0.752507	4.89722	6.7438	15.2884	24.7553	2.79867	8.41668	4.7827		TSNAX	17.335	11.5676	13.4562	1.41018	8.40179	23.3855	28.0201	15.154		EIF2B4	22.1064	14.1923	7.64799	4.60274	10.1489	7.13955	7.99519	8.04977
PRODH	0.800984	1.28614	4.39115	6.01784	5.71202	3.96006	4.00282	26.8147		ST13	9.85594	21.0656	8.00077	2.12627	8.69417	13.0412	10.7201	14.4594		WFS1	2.97756	9.05222	7.59228	4.62651	5.8799	8.02461	8.74292	22.3582		TYROBP	0.399675	2.39266	15.4904	14.6425	30.1177	4.62046	10.117	7.92744		FGFR2	3.43967	1.80895	3.06158	1.13797	4.44428	4.19367	8.18905	24.4212
RBM9	29.4638	36.8725	19.0834	0.416823	1.58452	10.869	20.5763	8.60534		STK24	12.4773	16.2126	23.0762	3.72112	7.66026	20.9639	23.5297	15.364		WWC1	24.164	26.0256	18.2781	2.03744	2.19605	8.12599	9.75057	11.829		WFS1	2.85522	6.55181	12.4548	1.75213	4.89845	7.60361	9.25929	22.7303		GRIA3	14.4366	4.26383	12.9084	0.51762	1.0143	5.1117	20.2441	8.69652
RELA	12.89	22.0948	8.00163	2.42421	3.13421	6.08599	6.9085	9.5304		STX7	28.3284	26.6219	23.467	2.69851	6.02905	15.8259	24.854	18.0057		ZNF365	2.4125	3.62527	3.50345	0.412339	6.61545	15.6087	22.9822	20.3353		WWC1	31.8278	21.1494	20.3579	0.821115	2.83896	6.49947	10.9229	11.029		GSS	28.3137	18.2052	12.673	2.35466	7.44396	9.18865	12.1114	10.3183
RXRB	18.351	18.7479	17.5321	2.28335	9.4648	12.2773	21.0402	10.7511		SYNJ1	7.09183	4.0868	16.7403	0.394901	0.791311	10.5739	23.3507	11.8417		SIGMAR1	8.90927	21.4307	10.7653	6.07427	13.536	9.88187	9.71813	12.4357		ZNF365	2.27737	1.49098	4.34399	0.108868	1.63471	21.727	27.0369	18.7576		LGI1	12.3721	12.8948	23.9113	7.00945	8.23719	12.2688	20.3029	11.7265
SEZ6L	19.9803	30.7546	22.4875	0.350474	1.18862	14.3008	27.9406	11.0153		TCF4	26.0403	15.6245	15.0229	0.695123	0.599445	6.41753	14.0605	8.6248		TECR	9.36975	19.7466	15.4392	18.2111	39.1692	25.4413	26.1428	30.5272		SIGMAR1	10.3346	20.4186	15.7558	3.80996	14.9348	10.8825	11.7315	12.208		NQO1	2.50628	4.57056	5.92643	7.39414	34.4787	20.1668	7.4523	18.6511
SHANK3	7.44914	5.00233	31.8833	0.813905	3.29453	13.4801	35.8164	32.1563		TEX264	5.80876	20.2496	22.1312	21.5781	19.2323	23.2992	21.9084	22.5467		FGFR2	2.36834	3.32853	2.25595	2.66689	6.69511	7.63345	12.2919	20.2414		ARRB2	14.4151	15.4922	18.1983	3.0387	20.9948	11.3796	18.5467	13.8888		NTSR1	26.4956	10.1621	2.3195	0.078219	0.036334	0.619056	0.432297	0.736811
SLC1A1	10.9819	24.1269	15.0172	0.422554	1.02257	9.92453	11.1118	5.82524		TIMP3	2.61981	9.1617	9.82602	6.67488	2.04025	9.31804	8.96706	23.0347		GNAL	14.934	20.9682	11.3951	0.576603	1.65532	5.0786	9.34635	5.92555		FGFR2	7.26774	1.51364	3.5702	1.08717	3.67992	14.706	9.4799	24.4868		PNPLA8	7.34118	11.0796	20.6116	6.62065	7.13552	18.6279	25.7779	16.3082
SLC25A1	16.1281	29.7488	11.147	4.79569	8.83261	5.79083	7.51181	12.9822		TSNAX	16.8055	10.9206	25.4366	3.03904	9.66982	21.8911	29.5816	13.9053		GSTT1	5.07344	0	12.362	11.0642	21.8741	0	9.29821	0		GSTT1	6.63349	0.069201	17.7577	7.77601	26.4051	0	6.80364	0		PICK1	25.1357	14.3899	11.7863	1.4215	5.24233	4.97255	9.98795	7.89246
SNAPIN	16.6701	21.0003	14.2717	16.9781	33.0975	16.2631	18.2975	14.4276		TUBA8	1.48736	3.8768	9.05428	2.46492	11.1658	21.4258	18.7139	18.5875		LGI1	10.6066	6.75149	20.0334	8.13546	8.1423	13.2161	20.0015	13.2643		HS3ST2	6.67896	15.5767	24.7982	0.374123	10.6291	12.6514	16.4195	7.08931		SLC25A12	10.2633	11.8536	14.7538	0.757207	3.49817	12.8762	22.029	9.62343
SOX10	2.67487	3.49675	12.0131	1.6715	6.39375	9.80004	21.7896	32.8066		UGT8	0.852155	1.50971	10.9952	2.52017	4.11582	14.5015	33.8937	37.9383		PNPLA8	15.6358	16.5274	13.0801	8.10417	6.43281	13.4057	22.5136	17.61		NQO1	3.45982	5.18815	4.93954	8.08879	39.0601	9.77763	5.38903	14.3025		TSC2	20.0019	15.1101	4.72052	0.941547	1.95286	5.30539	6.55256	8.79097
SRR	14.9622	27.5679	12.6627	4.54406	6.0412	8.24975	7.53484	9.86512		WFS1	2.75933	7.89643	10.1605	6.06481	3.02015	10.1301	7.92643	22.7823		NQO1	3.45688	4.87217	5.25374	8.88252	23.8163	7.20621	8.86455	12.5096		OGG1	8.745	16.8321	8.45987	4.00539	21.4442	6.31076	8.30995	5.15053		UBE2L3	8.12927	14.0445	15.3178	3.13678	12.0322	16.2556	20.9507	17.229
ST13	9.21215	22.4561	8.47183	1.35414	3.91192	14.5829	7.02807	8.31435		WWC1	29.9072	26.8092	32.3504	2.73434	2.90115	7.03258	10.5849	10.7568		USP46	7.58806	8.89785	7.89926	1.13769	2.75747	13.4446	20.0629	11.6349		USP46	10.6666	6.67338	12.0143	0.385855	0.698871	12.026	20.821	11.6578		USP46	8.71529	5.22481	15.5161	0.683234	1.42299	12.6655	23.2352	11.7747
STK24	12.2441	17.4834	22.6805	0.987132	3.2547	23.0952	25.3806	15.3794		ZNF365	4.19691	2.56476	8.95372	0.470576	1.52612	19.5425	37.6226	15.2221		UHMK1	0.582637	1.49811	2.07335	0.52211	1.67924	6.82985	20.6229	8.72125		XBP1	4.91712	11.1943	13.8057	3.72167	22.7188	11.1868	12.4787	8.5655		XRCC1	20.0105	10.3408	5.62822	1.63942	2.90407	3.45572	5.22446	6.99374
STX7	25.7922	32.9489	17.8591	0.971428	2.83472	17.1099	19.387	10.8985		SIGMAR1	9.55773	24.0882	16.4533	5.98061	3.74329	10.9968	13.7544	12.2124												ZDHHC8	4.08282	7.33157	23.1487	0.928936	12.5938	9.80353	15.3207	10.9225		ZNF74	26.8311	17.3766	4.55058	0.397161	1.45135	2.00518	2.89821	3.46735
SYNJ1	5.23687	4.9947	12.4612	0.231656	0.28443	13.4179	25.8118	8.144		TECR	6.66804	22.6871	13.369	23.0023	18.2182	26.4125	20.2007	33.4451		ST13	12.5108	17.2303	8.83825	1.64924	5.68156	14.1443	13.1327	17.2975												TSKU	21.4975	12.7725	1.59786	0.227624	0.360062	0.919976	0.762528	1.62808
TCF4	23.9325	33.0697	16.429	0.454936	0.398512	7.26232	13.5645	12.1185		DGCR6L	9.55027	33.4361	26.4863	37.6264	34.7232	34.2648	22.2583	24.1584		RELA	7.44891	19.6778	6.49199	3.03857	4.84909	5.61127	5.61545	7.93278		TUBA8	2.41359	2.76562	9.78566	0.354683	15.4259	14.5154	17.3984	14.7364
TEX264	8.16061	16.9173	23.996	15.9958	33.3944	22.211	17.3104	20.0402		ARRB2	12.335	19.2614	17.2009	7.87554	10.138	12.6452	22.4066	12.6697		RXRB	11.1196	16.2573	15.0135	3.66427	12.5542	12.3344	16.6804	11.9809		SLC1A1	13.7718	15.1954	9.75028	0.303792	1.62002	7.65376	11.2241	7.00007		SRR	16.4327	18.5365	12.5649	6.17007	7.41984	7.64008	8.18248	8.43176
TIMP3	2.75651	11.3268	17.7835	1.5935	0.923303	10.0361	8.19655	32.6262		CNTN2	6.23235	5.1239	6.17292	0.444597	1.60834	12.8983	22.2313	36.9077		MDGA1	9.01751	15.0528	2.45989	0.329844	0.420601	1.161	2.65986	1.83422		RELA	11.5386	19.7441	10.3422	1.41944	6.07305	5.98204	6.77463	8.47773		ST13	7.32838	17.9501	11.5557	2.04299	7.07481	14.294	15.1828	13.9802
TSNAX	11.7662	13.9223	23.2174	1.29602	3.38508	24.098	22.6234	12.3779		FGFR2	2.81236	2.16601	3.21747	2.66337	3.84182	5.1847	9.03038	20.4736		PLCB1	4.53001	4.99846	6.62662	1.44554	4.49025	8.11527	18.7642	13.628		PPP3CC	12.6488	14.3143	7.19489	1.08359	2.9497	4.74582	4.36622	3.34465		SHANK3	7.16938	3.59411	19.2022	0.503187	4.6906	10.9762	17.6919	19.0025
TUBA8	2.52686	2.83604	9.85333	1.16643	12.8456	23.4264	20.7188	12.134		GNAL	18.8506	12.3793	20.7176	0.505935	0.66772	3.4234	9.6505	4.50141		PPP3CC	15.4889	12.2032	8.52808	2.13356	3.18904	4.78612	3.85522	3.98543		PRODH	0.459036	0.962031	6.00447	4.34157	8.32098	3.83586	3.89309	17.0356		SLC1A1	10.2755	8.65911	13.9794	0.623826	1.02995	5.77929	12.978	5.97015
TYROBP	0.218998	7.40193	12.8409	17.8214	24.2101	6.75011	8.28763	10.2439		GRIA3	18.4456	8.5935	22.9605	0.561768	1.93972	8.06696	19.023	12.0243		PRODH	0.889055	2.00166	5.23964	8.43594	8.5813	5.00288	4.38699	16.6113		PEMT	6.54843	19.2988	11.4179	4.98424	15.5652	5.50139	6.27111	8.65877		PPP3CC	12.9635	10.234	10.0879	1.37698	3.9698	4.73785	5.47627	3.62415
UGT8	0.619802	1.08569	6.15259	1.24839	2.23	10.6081	32.9725	23.3304		GRIA4	6.64168	3.95023	20.0815	0.706813	4.05128	9.41477	18.9023	9.56332		PGAM1	1.77317	0.408802	4.55733	2.86422	4.84288	0.601404	8.63709	2.28149		PI4KB	16.3397	17.4397	11.9672	1.81223	8.84878	13.0399	15.7035	16.0873		PRODH	1.60467	1.4412	3.82322	4.75478	5.44298	5.63435	2.49894	17.3979
WFS1	3.71343	7.59917	13.2915	1.91386	2.331	11.0959	10.903	25.0261		GRIK2	25.2219	5.56804	6.14881	0.244209	0.697864	1.56149	3.89828	2.50016		NRXN3	2.62871	3.45333	7.23703	0.183148	2.82606	8.18332	11.9214	9.65116		PICALM	18.4846	18.1244	8.00904	0.589371	1.33257	16.8385	16.8145	18.96		PANX2	8.90856	7.13197	15.0022	1.55603	7.76724	8.33794	13.7809	16.0428
WWC1	32.9878	28.3436	31.1167	0.476469	1.3151	7.59247	12.9094	16.0096		HS3ST2	7.48197	22.4201	18.4373	1.28698	5.68554	17.3176	16.5479	9.73024		NR4A1	2.32443	10.564	11.0491	9.96677	19.8292	17.2137	18.4076	19.6074		NRXN3	4.08562	1.45613	10.671	0.139581	0.499702	8.32551	19.9743	8.40351		PCDH8	17.9773	12.4636	6.85272	0.333524	1.22469	8.72805	7.85871	6.83859
ZNF365	1.99343	3.15522	8.32948	0.088259	0.714218	22.3596	33.1648	7.84781		INPP4A	11.0991	10.1411	20.3904	0.26295	0.943501	7.02243	15.4588	5.17219		GRIN2A	0.755097	1.29381	9.29375	0.492333	4.44755	10.0682	19.7895	10.7849		MYH9	8.33526	4.06236	10.3162	0.713186	1.41226	9.79841	18.0889	19.6464		PEMT	8.43427	19.7262	5.94923	5.63608	11.3743	4.88274	7.31838	7.44569
SIGMAR1	13.1241	22.7907	16.6518	5.34786	9.34803	13.7083	12.3884	13.6073		LGI1	8.80687	7.44815	20.5007	10.4568	8.87328	13.3049	18.1779	12.6943		GFRA2	9.49171	17.7461	13.2281	0.455314	4.1241	9.68079	8.18869	10.6119		MDGA1	12.1494	6.10629	3.74359	0.146694	0.611308	1.24896	3.49193	1.35167		PGAM1	2.69616	0.813449	4.73546	0.985439	1.31129	0.965395	2.42407	1.62421
TECR	7.65844	19.9434	14.3954	14.152	27.7989	25.6498	26.1259	26.2637		PNPLA8	13.9218	15.6645	17.6982	9.3889	10.3616	15.3835	21.4475	15.7762		FGF14	9.97778	12.5436	9.21852	0.084089	2.36313	5.54599	9.6973	6.09567		MPZL1	17.7895	16.8376	3.79573	1.72877	2.01131	4.15841	7.13628	5.00225		PI4KB	18.6934	14.236	10.4611	1.90214	4.92622	8.40873	18.7538	15.8047
CNTN2	7.58615	7.74712	5.76158	0.173174	1.64487	12.2699	25.6463	22.256		POU3F1	3.70868	25.7486	2.89121	0.205969	0.453055	2.40886	2.06955	1.98344		DTNBP1	7.27725	8.54395	9.65012	3.27276	15.5295	14.7879	11.103	11.5262		IGF2	0.365222	5.23765	16.0948	0.903308	0.798532	1.52034	2.67466	1.5046		PICALM	11.9531	13.2241	9.69697	0.702897	1.14187	7.30457	17.2563	18.6455
PPARD	7.05831	5.90349	19.7893	1.30656	3.20607	11.4887	22.4587	18.7315		PICK1	8.40856	12.0494	22.3138	3.55046	6.48775	10.0663	11.1633	11.2351		DAAM1	18.89	16.5717	4.06065	1.72348	0.788434	2.11471	4.47168	2.89535		GRM7	15.2139	15.7056	6.81371	0.165198	0.576046	4.03555	6.503	2.53582		NRXN3	3.58666	0.653584	9.23026	0.687837	0.28678	4.34352	13.4976	7.01931
										USP46	13.3215	8.5424	18.1122	1.73217	1.92785	11.341	20.7099	9.28354		CRY2	5.89823	10.9362	16.3519	0.529433	4.14736	14.2503	14.7835	12.4666		HS6ST3	4.58047	1.4655	7.97848	0.039743	0.149798	6.00085	18.241	5.31601		MYH9	10.401	4.03794	9.54171	0.531897	1.04297	5.83666	8.92192	16.457
PPP3CC	11.3725	13.3955	7.96895	1.72079	2.2877	5.60695	5.27851	3.16266												HS6ST3	2.33636	4.74704	2.3689	0.475438	2.51495	5.37012	12.4481	7.66898		GFRA2	8.19961	16.132	15.1062	0.13561	3.93981	6.96975	14.4367	8.64633		MDGA1	13.3898	3.2782	1.93957	0.131647	0.260971	0.785496	2.24931	1.55532
AANAT	0	0.073769	0	0.105132	0.304056	0.15862	0.412668	0		TYROBP	0.65318	8.37634	4.96962	19.2962	5.87026	5.84156	9.73054	8.19599		HTR2A	0.57652	1.28711	3.41498	0.723353	4.5439	9.74755	15.6569	9.10225		FGF14	18.8035	15.0415	10.2752	0.058091	0.881811	8.60863	11.3095	6.23516		MPZL1	15.1944	12.3554	5.37317	1.48665	2.58839	6.55911	5.99952	5.02495
ABCA13	0.011049	0.003052	0.010142	8.4e-05	0	0.002562	0	0.009819		PPP3CC	13.6478	12.9465	10.1852	2.35642	3.05531	5.11892	5.18429	4.00668		IGF2	0.088677	14.457	4.30037	1.87034	1.15226	1.40015	2.16249	2.07102		FN1	15.2259	14.7843	12.8131	1.54806	1.23245	5.45133	9.75936	11.1928		KIF2A	18.5566	9.06255	18.4256	0.716354	1.35552	6.06213	15.5108	9.27903
ABCB1	0.693959	2.92393	2.89856	1.04914	0.520461	3.06342	3.51162	4.33341		PRODH	0.530291	1.42408	4.00806	11.1222	5.34323	5.53518	2.83802	17.4354		ASTN1	10.6382	17.1326	12.444	1.69084	3.21597	7.05608	14.8593	16.0915		DTNBP1	6.99418	7.57479	6.10485	3.06148	18.6017	12.6111	14.1275	11.5643		LSAMP	13.7614	2.63577	11.5561	2.47758	3.31539	5.44261	14.1239	19.3335
ACE	0.88189	1.98263	1.87332	0.252697	0.288593	0.939129	1.37462	0.788816		PGAM1	1.69868	0.962334	14.6175	4.57064	0.820311	1.47844	14.6253	1.64595		CCKBR	4.19859	11.3541	10.6126	0.663036	8.05078	12.3871	10.8141	10.5603		EGLN1	13.044	13.4704	13.1242	0.753443	2.31071	14.7644	19.5385	15.7742		IGF2	0.912606	7.45944	7.71955	1.51433	0.741733	1.50886	1.18514	2.45198
ACOX1	5.01103	8.18958	4.4184	0.507128	0.535912	2.99118	5.5867	8.80183		PCDH8	5.28078	17.1618	15.3837	1.13346	1.89401	13.5772	11.6711	12.9249		CHN2	16.8792	17.1295	11.8312	0.168613	1.83596	6.67244	8.94414	5.85569		CHRNA4	8.42256	8.06435	18.9857	0.280206	4.6467	7.16632	8.07658	6.02345		GRM7	14.2381	9.28705	6.81584	0.391705	0.438418	2.14892	4.60053	2.16528
ACSL6	3.39394	2.5812	5.39193	1.84085	2.08375	4.72522	14.1575	12.9518		MDGA1	17.045	10.4291	5.09383	0.366004	0.505396	1.52639	3.77611	1.62468		CHRNA4	7.6186	17.8369	10.5859	0.41843	2.74637	8.19701	7.80433	6.98423		CBS	15.7978	17.0714	10.3767	1.48926	3.11092	4.41424	6.64825	12.1693		HS6ST3	1.17977	0.409313	5.12992	0.352465	0.08964	4.88292	14.0927	2.22239
ACSM1	0.045881	0	0	0	0	0	0	0		GRM7	13.1894	18.1661	11.4823	0.509359	0.652816	4.60268	4.99474	2.18906		AP3M2	7.84278	10.8732	11.6288	1.32189	3.84293	11.9035	19.0614	11.8215		CCKBR	2.6454	7.90394	14.613	0.709144	15.0859	11.4261	18.6977	10.8643		GFRA2	9.09573	8.80553	11.3404	0.611913	1.48569	4.06784	12.9335	9.34851
ADA	0.734009	1.22106	2.7445	2.14736	2.60037	1.48742	2.19802	2.50229		GFRA2	7.4988	19.4051	16.4682	0.412466	1.80645	9.49241	12.4765	9.91824		APOL2	0.938183	1.65797	2.44922	2.39541	7.53894	12.387	15.1001	14.892		ASTN1	14.3098	7.04106	15.8847	0.467505	1.16149	7.25512	19.675	14.9755		EGLN1	14.9791	11.9033	16.7423	0.993883	1.72476	15.7876	15.0694	13.4672
ADAM12	0.172526	0.48312	0.417932	0.098328	0.014409	0.040829	0.201772	0.208653		FGF14	15.3113	16.5863	17.5672	0.538007	2.53378	8.54326	16.2613	4.66685		AANAT	0	0.075021	0	0.177258	0.31725	0.062886	0	0.071837		AANAT	0	0.009819	0.299418	0	0.307554	0.25042	0.199383	0.07256		FAM19A5	15.9807	8.68903	14.6007	1.61393	9.72153	15.1129	13.7357	19.6238
ADCYAP1	0.680147	1.79335	5.22296	0.246624	3.09548	7.0749	10.7425	3.3291		DTNBP1	5.27642	7.40961	9.70534	7.02288	11.4986	14.8217	13.0432	12.9805		ABCA13	0	0.003062	0.003362	0	0	0.007805	0	0.002932		ABCA13	0.007468	0	0.012387	0.003678	0	0	0	0.002961		FGF14	7.30542	2.97255	12.2841	0.15526	0.928528	5.74584	14.5751	4.64395
ADH1B	0.062407	0.081185	0	0	0	0.103153	0	0.397159		CHRNA4	9.00499	16.0276	18.9599	1.11089	2.02739	10.0764	11.4043	7.55946		ABCB1	1.13558	2.46272	2.66549	1.95051	1.45042	2.50367	3.72364	4.37474		ABCB1	1.18012	1.90382	2.93733	1.06634	1.46071	3.09959	4.10038	3.77145		FN1	11.2986	11.7626	12.0376	1.53648	0.906696	5.78523	5.23749	10.3025
ADORA2A	4.99823	6.48286	2.62582	1.19004	1.67962	2.32344	2.66207	2.72219		CCKBR	2.76111	10.205	13.4012	1.12743	3.90034	17.4977	16.2939	12.0389		ACE	1.10045	1.99525	1.8448	0.323463	0.463258	0.683761	0.696488	1.02713		ACE	0.944831	1.62269	1.77667	0.18083	0.247344	0.659988	0.75333	0.736164		DTNBP1	9.8339	7.27085	8.60994	2.56718	17.958	18.4434	11.7797	11.5349
ADRA1A	0.092814	0.098649	0.810095	0.089914	0.119122	0.509919	0.729681	1.912		AANAT	0.154323	0.077293	0	0.148976	0.293593	0.322709	0.171657	0		ACOX1	4.29127	9.18723	2.81952	1.11882	1.16254	2.67875	6.11338	7.9103		ACOX1	7.12856	4.74816	3.59576	0.321819	1.28074	3.15386	5.12416	7.97938		DAAM1	12.6123	4.96893	7.0862	0.92689	0.556454	1.03934	4.42369	1.86719
ADRBK2	5.5085	3.67336	8.01711	0.321425	0.395596	2.86507	8.14493	2.10754		ABCA13	0	0.006309	0	0.00608	0.004012	0.000511	0	0.002804		ACSL6	2.60275	2.8422	4.22379	2.94713	4.81402	4.19698	11.631	14.4095		ACSL6	2.5726	1.02493	5.97015	1.52731	3.29901	4.39123	10.9631	12.4905		CRY2	13.9327	5.05456	17.4944	0.475281	1.97309	13.0291	15.4481	11.4353
ADSL	9.10841	14.765	7.77577	5.22207	9.62402	9.6535	8.12347	4.61845		ABCB1	1.17345	2.30655	3.41105	1.73669	0.933582	3.48026	3.85492	4.69433		ACSM1	0	0.025085	0	0	0.026609	0.021315	0	0.02402		ACSM1	0.101685	0	0	0	0	0.04624	0	0.024262		CARTPT	0.821431	2.7978	12.3712	0.725814	3.97182	6.5394	4.84862	6.74406
ADSS	13.4724	17.1362	13.5155	1.25567	2.87227	13.7419	17.3175	11.1412		ACE	0.946097	2.54547	2.10541	0.503516	0.206596	0.782634	0.868053	0.783992		ADA	0.448986	1.02045	1.19547	2.44963	2.97743	1.74592	2.11286	1.82554		ADA	0.848027	1.18721	1.65746	2.28471	5.84845	2.16439	1.59577	1.74054		CCKBR	5.72516	6.28707	6.64462	0.401578	4.47746	12.6561	14.8183	10.6364
AGAP1	4.7374	3.81278	6.48787	0.347778	0.385128	4.93673	9.32322	5.33487		ACOX1	6.52688	5.82781	5.44782	1.49046	1.49607	2.75098	5.79856	6.62857		ADAM12	0.009211	0.351255	0.069988	0.015268	0.003031	0.027456	0.156974	0.076615		ADAM12	0.139268	0.218099	0.162742	0.01954	0	0.044773	0.067765	0.136062		CHN2	15.9436	11.972	15.355	0.306224	1.82043	6.3695	10.2652	5.31302
AGER	2.2814	0.211844	0.406197	0.502901	0.372008	0.14697	0.758855	1.07482		ACSL6	4.43239	1.73327	9.23838	3.62002	3.18168	4.77557	16.2232	11.5895		ADCYAP1	0.10699	0.681365	2.60986	0.373101	3.2973	4.34785	5.18432	3.92834		ADCYAP1	0.484751	1.26049	6.87961	0.251415	5.87953	3.56635	6.27952	3.72404		ASTN1	19.6032	4.89345	14.2271	0.818004	1.02075	4.43659	15.2492	12.5124
AHI1	3.12606	0.789408	3.59992	1.10612	0.34769	1.35319	4.8319	1.97736		ACSM1	0.108016	0	0	0	0	0	0.037922	0.04595		ADH1B	0.050193	0	0	0	0.105335	0	0.111519	0.07799		ADH1B	0.018495	0	0	0	0	0.158364	0	0.284885		ANK3	15.0003	3.11464	9.72441	0.715992	0.354405	3.4515	12.4669	10.2231
AIF1	1.17186	2.79646	8.21736	4.03935	7.62454	3.93374	5.45421	3.1754		ADA	0.515537	1.51487	1.31248	4.13836	1.95158	2.06483	1.71122	1.77823		ADORA2A	2.33009	7.12419	2.22574	1.54676	2.76814	1.18459	1.99075	1.61723		ADORA2A	2.84097	5.13849	4.08399	0.99686	2.35162	2.03803	3.05511	1.89175		AANAT	0.043453	0.213187	0	0.157692	0.194115	0.535523	0.085443	0.040671
AKR1D1	0	0	0	0	0	0	0	0		ADAM12	0.179541	0.64452	0.26024	0.012658	0.021027	0.030912	0.146546	0.073886		ADRA1A	0.071927	0.081821	0.398313	0.159949	0.071478	0.29625	0.90004	1.14383		ADRA1A	0.105638	0.039818	0.436913	0.043364	0	0.312189	0.671553	1.26881		ABCA13	0	0	0	0	0	0	0	0.005545
ALDH1A2	0	2.26959	1.28912	0.059924	0	0.453299	0.56174	0.379335		ADCYAP1	0.744644	2.15622	8.80555	1.16886	2.25318	4.24842	6.77011	4.21598		ADRBK2	4.81585	5.85309	4.30601	0.524684	1.2224	3.09455	7.06616	4.08141		ADRBK2	8.76018	1.63586	3.15967	0.23145	0.603101	2.36918	5.10109	3.12266		ABCB1	1.02747	1.99445	4.21192	0.850175	0.781164	4.29219	3.71217	4.01996
ALDH1A3	0	0.904409	0.77223	0.149609	0.285823	1.23158	2.07451	2.43909		ADH1B	0	0	0	0	0.054095	0.033925	0.062409	0.191094		ADSL	11.2816	15.7654	9.23156	4.59124	10.5729	7.74999	8.04791	5.82549		ADSL	11.3607	18.4074	6.742	4.39499	12.5568	7.84284	8.07112	5.47797		ACE	1.68734	1.96752	1.57147	0.246373	0.178986	0.602597	0.665189	0.749874
ALDH3B1	0.176489	0.152368	0.424988	0.132592	0.026996	0.28697	0.765064	1.123		ADORA2A	3.09659	5.96045	3.18925	2.15575	1.38993	2.05934	2.21752	2.37085		ADSS	18.5942	16.3954	13.249	1.45939	5.0686	14.7951	17.6268	12.9664		ADSS	17.0912	16.1124	12.08	0.913048	3.48483	14.7792	18.6288	12.6192		ACOX1	4.17163	2.78938	3.52354	0.637083	0.895195	2.15618	5.01809	7.96035
ALDH5A1	3.86092	6.43034	8.98336	0.634997	0.32882	7.63471	9.23232	13.777		ADRA1A	0.064405	0.114671	0.681176	0.176816	0.173441	0.366152	0.721259	0.9993		AGAP1	2.60463	4.72027	2.47197	0.246885	2.02854	5.63144	8.48971	7.68014		AGAP1	3.73173	1.52762	4.97345	0.199609	0.538867	5.86798	8.79702	9.09937		ACSL6	1.51963	0.706528	6.80083	2.33981	3.03258	3.52707	13.5144	12.0478
ALK	0.132839	0.088694	0.554355	0.036681	0.048487	0.31401	0.677911	0.662562		ADRBK2	9.95173	2.57612	10.9548	0.362709	0.904908	2.74952	7.20192	3.61959		AGER	1.15858	0.24567	0.39027	0.67871	0.386291	0.027106	0.297491	0.253492		AGER	1.43858	0.107446	0.459252	0.555412	0.448322	0.114551	0.846696	0.395883		ACSM1	0.035839	0	0	0	0	0.022573	0	0.024438
ALOX12	0.325395	0.077759	0.188311	0.069999	0.083379	0.103323	0.232194	0.752545		ADSL	9.67263	14.7337	8.53604	7.07711	8.58331	8.2186	9.36635	5.3148		AHI1	3.46142	1.35759	2.18026	0.744533	0.997919	1.29825	4.9292	2.80361		AHI1	2.84069	0.53792	2.14571	0.560347	0.611151	1.41965	4.44235	2.62396		ADA	0.458073	1.47099	1.43625	2.08129	2.99638	0.954485	1.28425	2.03109
AMACR	3.6116	3.5641	3.76588	1.03326	1.05761	6.18008	5.43228	3.1225		ADSS	17.3862	16.8598	17.2917	2.37096	6.77959	13.233	17.87	12.0534		AIF1	1.27509	2.32194	5.87025	4.02492	7.04853	3.56754	6.86832	4.5224		AIF1	0.979406	1.14006	2.29019	4.68553	5.57209	4.36768	7.22267	4.20318		ADAM12	0.138181	0.102039	0.15719	0.015924	0	0	0.054589	0.08197
ANKK1	0	0	0	0	0.018253	0	0	0.128613		AGAP1	4.27248	1.73838	6.98289	0.423262	0.586095	5.33565	8.59187	6.27391		AKR1D1	0	0	0	0	0	0	0	0		AKR1D1	0	0	0	0	0	0	0	0		ADCYAP1	0.720347	0.555545	4.27628	0	1.84295	4.99296	6.73606	2.2367
ANKRD12	9.89648	9.31284	6.81208	7.74089	1.81092	2.64667	6.15806	5.39008		AGER	0.820334	0.342316	0.405699	0.478798	0.245922	0.138565	0.302507	0.298244		ALDH1A2	0.039806	0.490909	0.532785	0.066719	0.031262	0.29673	0.501214	0.180143		ALDH1A2	0.109055	0.339309	0.431196	0.088266	0.051182	0.609113	0.513933	0.390072		ADH1B	0	0	0	0	0.037284	0.484439	0.139169	0.363167
AP3B1	1.06314	1.72327	1.87447	0.195144	0.451149	1.25327	3.35736	3.98696		AHI1	4.58586	0.793814	5.29516	0.439274	0.588005	1.03283	6.06982	2.22212		ALDH1A3	0.03795	0.373888	0.540466	0.087157	0.825044	1.48759	1.44205	2.45368		ALDH1A3	0.034861	0.125658	1.00953	0.218092	0.246243	1.00581	2.2743	1.91949		ADORA2A	8.55013	4.86163	2.93481	0.769657	5.69681	3.23338	1.76296	2.53282
AP3M1	8.58708	15.2133	6.42925	0.443381	0.69184	3.40564	8.65318	5.86274		AIF1	0.915769	2.93981	7.68899	4.1422	5.93998	3.17836	7.89376	6.21669		ALDH3B1	0	0.094002	0.178989	0.07505	0.280733	0.298996	0.353068	0.958514		ALDH3B1	0.111264	0.033721	0.125058	0.021873	0.27992	0.271629	0.082151	1.27122		ADRA1A	0.174491	0.02208	0.570061	0.269203	0.047273	0.401987	0.645647	0.874928
APOL1	0.480995	0.628732	1.94974	0.72172	0.438575	0.274704	1.47121	1.98486		AKR1D1	0	0	0.092053	0	0	0	0	0		ALDH5A1	4.19298	7.57642	6.8794	0.767208	2.16525	6.14587	11.2407	11.624		ALDH5A1	4.86807	3.29206	7.66276	0.300769	0.761528	5.96983	10.2238	11.4334		ADRBK2	3.97166	1.07622	8.6517	0.369795	0.686723	2.62469	7.34925	2.82422
APOL3	0.167631	0.764232	2.31439	1.27852	0.254572	1.11109	1.37845	2.86572		ALDH1A2	0.14489	1.14132	0.673416	0	0.078294	0.24167	1.22858	0.273252		ALK	0.15489	0.20636	0.365888	0.064228	0.136928	0.393267	0.577746	0.607162		ALK	0.119434	0.125926	0.544922	0	0	0.336246	1.03112	0.733048		ADSL	11.2599	12.3975	9.42056	5.65666	10.9793	7.2828	9.91905	6.19327
APOL4	0.365914	2.07872	0.105404	0.071462	0.094676	0.143451	0.144005	0.100523		ALDH1A3	0	0.428881	0.594872	0.212018	0.694301	0.99475	2.76333	2.16419		ALOX12	0.151036	0.170233	0.203551	0.006052	0.149423	0.151897	0.160334	0.325714		ALOX12	0.297833	0.069337	0.279836	0.082332	0.29173	0.15137	0.276156	0.334795		ADSS	15.3899	13.8724	17.6661	1.20779	3.65132	12.9767	19.1765	12.3913
APOL5	0	0	0.207458	0	0	0	0	0		ALDH3B1	0.060264	0.09554	0.235751	0.430514	0.16313	0.309405	0.301507	0.905186		AMACR	5.11878	4.38349	4.06908	0.931393	1.28137	5.06294	3.98666	3.91869		AMACR	3.80453	3.41044	3.36783	0.833937	1.61256	5.7239	3.92451	3.25587		AGAP1	6.19976	1.71944	5.09246	0.177716	0.680899	4.86396	8.36659	8.46098
APOL6	0	0.226298	1.80078	0.092325	0.041874	0.473341	0.746738	2.13892		ALDH5A1	5.22158	4.09806	12.8582	1.22435	0.487865	6.95213	10.7374	10.2194		ANKK1	0	0	0.022318	0	0.021563	0.027776	0	0.116786		ANKK1	0.024959	0	0	0	0	0	0	0.078641		AGER	1.20037	0.429014	0.382447	0.279828	0.220386	0.019013	0.367315	0.177911
AR	0	0.049967	0.277995	0.067798	0.045216	0.39873	0.582236	0.254591		ALK	0.172873	0.181339	0.708409	0	0.072834	0.41452	0.62155	0.612234		ANKRD12	11.7265	9.26704	3.97413	6.58235	1.96991	3.33298	6.69075	5.84686		ANKRD12	14.4984	3.74255	4.07838	4.99682	1.18454	3.14556	6.98149	5.36377		AHI1	1.19894	0.409934	3.78969	0.556316	0.37603	1.35725	5.15394	1.87147
ARHGAP18	1.32257	1.58745	0.680719	0.218237	0.062361	0.455081	0.673945	0.58817		ALOX12	0.109834	0.13146	0.046567	0.18627	0.089808	0.200169	0.24351	0.269891		AP3B1	2.00664	1.71124	1.57994	0.596185	0.969991	2.14823	3.289	3.33379		AP3B1	2.13125	1.64097	0.937444	0.527079	0.74358	2.54318	3.16745	4.19386		AIF1	0.74284	3.6532	7.1188	3.69407	10.6739	8.09845	6.09689	3.28279
ARHGEF10	1.86432	1.04603	1.74517	0.002413	0.115609	1.40944	3.62134	2.94297		AMACR	4.82747	4.73185	4.98669	1.37167	1.44463	6.27008	4.88994	3.35065		AP3M1	11.0048	12.2306	4.76623	0.530676	1.61279	3.56986	8.45113	5.53441		AP3M1	14.7796	11.3496	4.86734	0.518482	0.801211	4.30185	6.98624	6.20146		AKR1D1	0	0	0	0	0	0	0	0
ARMC3	0.05169	0.09015	0	0.002407	0.015732	0.069926	0.071787	0.222462		ANKK1	0	0	0	0	0	0	0	0.045789		APOL1	0.499449	0.623367	1.73663	0.980312	1.26839	0.720391	1.24045	1.63814		APOL1	0.836696	0.222818	1.25502	0.470366	0.438614	0.618166	2.58825	1.41217		ALDH1A2	0	0.299932	0.970643	0.016344	0.026617	0.47228	0.619248	0.441706
ARNTL	2.67279	3.33871	5.32602	1.0161	1.56018	6.602	10.7385	5.82379		ANKRD12	17.3368	6.20578	11.04	5.65373	1.5273	2.48821	6.02012	5.3928		APOL3	0.267969	0.721684	1.73932	2.24239	0.972815	1.19798	2.19178	2.55007		APOL3	0.2846	0.097918	2.37341	1.00964	0.574612	1.27251	2.8331	2.89995		ALDH1A3	0.130833	0.094005	0.835789	0	0.345631	0.965111	1.89495	1.7858
ARNTL2	1.8462	1.79825	4.30199	0.575336	0.539407	2.86679	3.63018	1.73832		AP3B1	1.79271	1.49262	1.93781	0.635517	0.511561	1.83692	2.5983	3.22923		APOL4	0.183219	1.52643	0.230481	0.168354	0.163736	0.115822	0.186761	0.10096		APOL4	1.07068	1.68511	0	0.16888	0.318265	0.261767	0.280213	0.124025		ALDH3B1	0.158503	0.065102	0.134886	0.025263	0.14303	0.39819	0.139894	1.1617
ARRB2	15.9292	18.4301	16.1373	3.98173	13.5537	12.1455	19.4572	12.2571		AP3M1	13.3714	11.4023	10.5293	0.977508	0.706134	3.34705	9.16057	3.9939		APOL5	0	0	0	0	0	0.061056	0.047251	0.076708		APOL5	0	0	0	0	0.160476	0.06578	0	0.069027		ALDH5A1	2.72132	1.57992	9.25161	0.825053	0.429812	7.30465	10.5813	10.192
ARSA	5.71987	6.20798	4.18687	1.9852	4.22693	5.23024	7.35386	7.12633		APOL1	0.602622	0.532155	2.92992	1.35241	0.67926	0.389261	2.09329	1.91535		APOL6	0	0.090811	0.293727	0.108753	0.096331	0.308658	1.20078	1.65277		APOL6	0	0.048864	0.844034	0	0	0.122721	1.19695	1.16318		ALK	0.207933	0.029259	0.306534	0.001039	0.032586	0.259082	0.445846	0.547566
ARVCF	11.6861	15.8486	5.50438	0.321361	1.14073	2.69315	2.97676	4.4412		APOL3	0.481834	0.53582	2.16672	2.76922	0.659536	1.07662	2.01989	2.96417		AR	0.020688	0.06714	0.18404	0.057587	0.088786	0.283517	0.344849	0.261288		AR	0.035371	0	0.135817	0.020164	0	0.27554	0.737256	0.240223		ALOX12	0.271195	0.104948	0.182739	0.053164	0.120376	0.035811	0.081985	0.59436
ASCL1	2.78036	5.05083	6.10912	1.76165	2.59191	3.5207	2.02351	3.25055		APOL4	0.303876	0.829388	0.385661	0.196168	0	0.06679	0	0.078299		ARHGAP18	1.5917	1.23555	0.806867	0.392407	0.02478	0.508843	1.03459	0.533517		ARHGAP18	1.42602	0.503459	0.370374	0.167236	0.105771	0.402386	0.54952	0.725739		AMACR	4.00479	4.03451	3.90502	0.655159	1.84008	5.17854	4.46471	2.89143
ASPM	0.447583	0.211972	0.10271	0.029382	0.016003	0.037177	0.018506	0		APOL5	0	0	0.144236	0.142687	0.229668	0.034138	0.054314	0.022234		ARHGEF10	1.17587	1.47436	0.898464	0.338919	0.858144	1.93277	3.08881	4.07728		ARHGEF10	1.60927	0.778479	1.30401	0.117602	0.147753	2.72654	3.25613	5.08952		ANKK1	0	0	0.020536	0.007024	0	0	0.022842	0.111201
ATE1	3.06499	4.3061	5.63382	0.211499	0.488044	4.4337	5.48375	3.30836		APOL6	0	0.015804	1.1761	0.270497	0.118998	0.404624	1.04171	1.34934		ARMC3	0.216812	0.121692	0.108137	0.098102	0.064796	0.157521	0.217028	0.205623		ARMC3	0.209891	0.055798	0	0	0	0.062845	0.22652	0.274556		ANKRD12	5.91004	3.18276	7.96462	5.31342	3.49893	1.43615	6.11661	5.50252
ATF5	11.2637	10.1695	10.0203	2.51499	3.34068	4.20506	5.49069	6.54553		AR	0.019369	0.034353	0.264053	0.032881	0.04399	0.174793	0.565114	0.1126		ARNTL	2.6931	3.05762	5.03805	0.94502	2.80571	5.31408	8.61135	6.0797		ARNTL	3.19373	3.48787	4.5956	0.933786	1.96927	5.02465	11.1078	5.99613		AP3B1	1.00653	0.725156	1.8382	0.294518	0.457914	1.4644	2.48993	3.62828
ATG9B	0.121695	0.146217	0.108387	0	0	0.013596	0.18861	0.152762		ARHGAP18	2.40146	1.24792	1.62555	0.32346	0.292042	0.329648	0.817498	0.572762		ARNTL2	1.88432	2.10441	2.49168	0.294084	0.98694	1.88976	5.12547	1.14857		ARNTL2	1.2164	0.863906	2.42381	0.171504	1.16589	1.66484	4.10856	1.12896		AP3M1	7.27649	6.24114	7.80872	0.355677	0.416067	3.19554	8.01974	5.22451
ATM	1.8234	0.67163	0.505313	0.077338	0.098953	0.283887	1.12977	1.17447		ARHGEF10	1.39601	0.871365	1.92778	0.390859	0.335864	1.44406	2.64421	3.67889		ARRB2	12.8637	17.7895	17.79	3.92526	15.6281	11.7418	19.7588	13.2391		ARSA	4.022	5.59312	6.72616	1.84767	5.71384	4.92359	7.93324	6.33779		APOL1	0.546208	0.135694	2.6332	0.623944	0.853862	0.572273	1.36652	1.637
ATXN1	5.60972	4.90228	15.5921	0.353333	0.778629	7.91336	18.3664	8.44721		ARMC3	0.178146	0.072202	0.071378	0.069111	0.046847	0.016422	0.052615	0.217063		ARSA	2.47169	7.01683	3.51856	2.53387	7.72052	4.97342	5.66298	5.6247		ARVCF	9.13455	12.92	5.16306	0.402649	2.15654	2.24273	2.87983	3.43489		APOL3	0.151893	0.63842	2.05425	1.04998	0.907855	1.94787	1.34751	2.08493
ATXN3	2.21132	1.4293	2.77901	0.36854	0.762367	1.96429	2.96961	1.93212		ARNTL	2.43333	3.30721	8.05979	1.91815	2.37213	4.53751	10.4636	6.05013		ARVCF	5.70718	19.7529	4.09255	0.921954	1.94995	2.66804	3.0121	3.60644		ASCL1	4.9148	5.22643	6.71078	1.58316	5.63181	2.73359	5.20272	3.61159		APOL4	0.728765	1.26158	0.340663	0.136616	0.190023	0.114112	0.039494	0.096132
BAG3	1.92849	2.43803	1.87097	1.66569	1.00064	2.20897	4.02919	14.2385		ARNTL2	2.07073	1.34437	4.83739	0.694989	1.05405	2.64511	5.33971	1.22612		ASCL1	0.971058	6.65981	2.96736	2.30164	5.66287	2.15776	3.11205	4.7692		ASPM	1.17014	0.176628	0.089885	0.024736	0.019901	0.012319	0.011841	0.026787		APOL5	0	0.035637	0.2383	0	0.032448	0.096991	0	0
BAK1	0.515695	1.9117	2.73625	0.25868	0.884947	1.26201	0.65871	0.793608		ARSA	2.85008	6.81234	3.4545	3.21627	3.4255	5.52078	5.67593	7.10053		ASPM	0.486212	0.276658	0.07893	0.037927	0.037874	0.034022	0.023439	0.029749		ATE1	4.13798	2.10808	2.83373	0.187218	0.83424	5.08465	6.07129	4.25071		APOL6	0	0.090077	0.705387	0.096748	0	0.08172	0.356478	1.17485
BCL2L11	0.422889	1.00866	0.160027	0.098233	0	0.160592	0	0.431288		ARVCF	6.18575	16.3326	5.50108	0.95814	1.33562	3.63964	2.90186	3.15613		ATE1	2.45375	4.0896	2.37955	0.397078	1.08342	3.38514	5.83796	4.22435		ATF5	7.20069	10.5547	8.7527	1.42582	6.22193	2.87408	3.87012	3.79091		AR	0.047962	0	0.242817	0.000483	0.059819	0.181051	0.365002	0.265751
BCL2L13	5.23426	6.64407	9.21723	1.0506	1.54534	8.73511	9.30912	8.884		ASCL1	1.57354	6.73553	4.58091	2.94124	2.05547	3.21918	2.19602	4.37133		ATF5	5.28784	10.8156	4.8964	2.66409	4.88025	2.92733	4.26495	4.06532		ATG9B	0.160438	0.129355	0.192721	0.039041	0.074583	0.060522	0.171559	0.054684		ARHGAP18	0.827159	0.911496	1.22791	0.321515	0.166788	0.740573	0.859167	0.56672
BDNF	1.11566	1.21222	9.85578	0.681065	4.44289	8.51143	11.6693	5.69758		ASPM	0.326217	0.201293	0.107455	0.04089	0.029113	0.031637	0.033587	0.025863		ATG9B	0.099589	0.164051	0.092626	0	0.051947	0.080764	0.06499	0.031332		ATM	2.67607	0.28947	0.30582	0.07607	0.155461	0.629555	1.30208	1.33341		ARHGEF10	1.28359	0.841564	1.53417	0.090389	0.313609	0.890023	1.82914	4.16401
BHLHE41	0.116426	0.487598	1.5727	0.276589	0.570797	8.74055	9.49993	8.82938		ATE1	4.34377	2.27058	5.83262	0.339788	0.654988	4.38854	6.71769	3.19002		ATM	1.44209	0.802842	0.328437	0.168737	0.181524	0.490027	1.31662	1.23941		ATXN1	4.20679	1.65956	9.44534	0.418692	1.32893	6.62301	14.312	9.17639		ARMC3	0.089639	0.154995	0.291929	0	0.036779	0.015127	0.039376	0.166001
BIK	0.162727	0	0	0	0	0.077645	0	0		ATF5	4.31521	13.6072	7.13308	4.9938	2.37155	3.87104	5.57358	3.17857		ATXN1	1.58966	3.53266	5.38048	0.72969	2.94432	5.42852	10.9483	9.4776		ATXN3	2.33648	0.568406	1.21673	0.485529	0.716096	1.92643	5.10923	2.34884		ARNTL	5.17545	4.14163	5.88725	1.0326	2.00967	4.36076	12.688	4.92904
BIN3	7.95046	3.49778	9.16134	0.700272	5.76098	4.58454	6.15812	4.65799		ATG9B	0.158675	0.149984	0.104337	0	0.008751	0.070855	0.098935	0.04526		ATXN3	1.94555	1.14372	1.60523	0.625316	1.54292	1.95436	3.58549	2.92833		BAG3	1.44526	1.32864	3.48675	1.02087	1.70939	2.78099	4.30683	9.97649		ARNTL2	1.44945	0.621741	4.2862	0.462131	1.78683	2.17126	4.44097	1.27024
BLOC1S3	4.39842	9.25398	1.5742	0.273368	0.664448	2.48169	3.61457	1.96189		ATM	2.83054	0.360586	1.10288	0.057973	0.171882	0.305665	1.15788	0.887164		BAG3	1.13632	2.64705	1.6036	2.7825	2.18289	2.95216	5.06481	11.1319		BAK1	0.9287	2.34526	2.18925	1.15878	2.62371	1.31792	1.12549	1.37204		ARSA	4.63456	8.1329	2.24655	1.20305	2.92341	3.30923	4.95538	6.3128
BMP6	0.120347	2.58797	1.40151	0.022465	0.137421	0.586475	0.751229	0.59051		ATXN1	4.3882	3.09589	13.6748	0.781696	1.6326	7.48155	14.9486	7.28125		BAK1	0.727081	1.19725	0.877303	0.91621	2.09269	1.35126	1.15058	1.25658		BCL2L11	0.495401	0.514984	0.390911	0.127052	0	0.565617	0.225559	0.379489		ARVCF	16.2595	12.4672	3.0824	0.265476	1.10243	2.05732	2.19893	2.99679
BRCA2	0.072395	0.054409	0.030168	0	0.004089	0	0.018915	0		ATXN3	2.38351	1.46906	3.15662	0.651045	1.63031	2.06618	4.23992	2.90902		BCL2L11	0.173804	0.997553	0.190667	0.114147	0.086567	0.48207	0.430164	0.278188		BCL2L13	7.09365	3.2792	8.34225	0.768095	2.54151	8.10565	9.52232	9.38551		ASCL1	13.2171	19.2647	2.74467	1.21866	3.22748	3.18443	2.04744	5.29853
BRD1	13.7867	9.89839	3.6892	0.106025	0.233476	2.37113	4.44468	5.14977		BAG3	1.26816	2.0867	2.18524	3.53495	2.25149	2.27284	3.1936	10.1884		BCL2L13	4.66056	6.83602	6.54157	2.13825	3.00796	7.00737	11.0019	9.9943		BDNF	2.02891	1.26795	6.92901	0.643502	5.41363	7.65833	7.87625	7.03453		ASPM	0.155872	0.150021	0.101182	0.093138	0.0385	0.00233	0.005954	0.010375
BTBD9	4.37417	4.54099	9.75339	0.293428	0.516867	5.81248	9.24125	5.9765		BAK1	1.24337	1.47859	1.60307	1.44137	0.801565	1.59218	1.71515	1.73504		BDNF	4.09997	3.61172	5.63299	1.06421	5.29996	6.84023	10.9328	7.30603		BHLHE41	0.354391	0.312478	3.74474	0.208976	1.98197	8.37671	7.56287	11.2183		ATE1	2.17995	1.43458	5.2566	0.334338	0.479978	3.5195	6.87032	3.52291
C10orf120	0	0	0	0	0	0.038857	0	0		BCL2L11	0.497699	0.435856	0.211192	0	0.063306	0.145779	0.173706	0.185962		BHLHE41	0.030629	0.337451	1.04688	0.801975	1.97388	5.29172	5.96099	10.3351		BIK	0.083455	0.074549	0	0	0	0.054211	0	0.070793		ATF5	16.4384	11.824	4.52004	1.7803	2.65128	2.55168	3.72546	4.06001
C18orf1	7.32532	9.54871	14.2644	1.02545	4.97063	11.4479	17.9706	9.64306		BCL2L13	5.70269	4.95064	11.1345	1.42394	2.66283	7.95216	12.6858	8.94185		BIK	0	0.169916	0	0	0.203815	0	0.178775	0.176472		BIN3	5.46138	4.35373	7.35213	1.29007	10.2263	4.20303	3.3842	3.37584		ATG9B	0.140568	0.17266	0.070667	0	0.044631	0	0.056031	0.092547
C1QTNF3	3.59232	2.28416	2.6175	0.499473	0.419999	1.84504	1.57936	3.72833		BDNF	4.66052	5.10593	11.9248	2.6519	3.47141	6.28386	10.6206	5.67687		BIN3	3.65569	4.4185	4.7592	0.957475	6.10694	3.6957	4.1332	4.75254		BLOC1S3	2.54914	5.6011	5.17785	0.108923	1.40152	2.09981	4.81949	2.62584		ATM	0.806212	0.130788	0.828605	0.178732	0.064433	0.366075	1.09433	1.34598
C1QTNF6	2.27408	3.19111	1.49017	0.302078	0.639455	0.219423	0.35054	0.496558		BHLHE41	0.198559	0.364738	1.59458	1.2467	0.976367	7.97967	6.34198	9.76455		BLOC1S3	1.35903	7.78622	1.97272	0.738873	1.0978	2.04568	1.17055	3.70043		BMP6	0.293424	0.450924	1.56445	0.128298	0.137105	0.494437	0.504602	0.61146		ATXN1	5.76582	1.49522	7.44371	0.351774	0.857706	6.50744	9.31286	7.20631
C2orf86	0.922845	1.07863	1.001	0.309798	0.211811	0.648137	1.60115	0.324509		BIK	0	0.017506	0	0	0.226082	0.054646	0.00988	0.031125		BMP6	0.165423	1.2554	0.574616	0.14407	0.190989	0.437059	0.500488	0.846734		BRCA2	0.26998	0.024304	0.036848	0.027279	0	0.012592	0.024205	0.025415		ATXN3	1.83564	0.500004	3.31188	0.235355	0.838896	2.10859	3.73273	2.93845
C3	0.902502	1.61269	9.69749	7.84972	9.22395	2.55083	10.8324	5.69213		BIN3	3.33818	5.4943	8.17009	1.47772	3.09823	4.65412	4.39907	4.19533		BRCA2	0.128788	0.095507	0	0.010907	0.009661	0.007739	0.023956	0.021803		BRD1	12.4887	7.06774	3.0271	0.150973	0.236098	2.35149	3.96809	4.49617		BAG3	1.33492	1.82682	1.99908	1.44034	2.07314	2.36336	2.93487	12.233
C4A	0.159755	0.158331	0.029408	0	0.007972	0.022184	0.110127	0.224688		BLOC1S3	1.53357	8.79187	3.63516	0.117965	0.905447	3.10555	3.35912	3.17197		BRD1	6.51977	11.6067	2.35463	0.342495	0.740627	2.4408	2.40509	3.93076		BTBD9	5.69498	1.14073	5.80414	0.059482	0.986753	3.34588	10.627	5.93771		BAK1	1.89979	1.65603	1.07726	0.87449	1.55273	1.58865	1.58824	1.31805
C6	0	0	0.020814	0	0.014912	0	0	0		BMP6	0.598067	1.93085	0.954508	0.239707	0.117428	0.536563	0.653872	0.774673		BTBD9	4.36748	5.38696	5.7379	0.114693	1.40122	5.27496	9.72001	7.3231		C10orf120	0	0	0	0	0	0.042804	0	0		BCL2L11	0.131517	0.327023	0.1344	0	0.158022	0.203272	0.203949	0.342862
CABIN1	8.72634	7.59159	8.75843	0.497255	1.2966	5.12793	8.98891	6.21423		BRCA2	0.099919	0.035441	0.040085	0.035927	0.005967	0.008654	0.013769	0.004171		C10orf120	0	0	0	0	0.048599	0	0	0		C18orf1	8.03697	4.83626	6.94441	0.677965	5.99775	13.283	15.3415	14.8037		BCL2L13	5.52032	3.45122	7.76561	0.754609	2.49447	6.82561	10.4981	8.39185
CACNA1A	12.7884	7.38063	10.505	0.405608	1.01307	5.20363	8.41604	5.79263		BRD1	9.35353	9.59931	4.65214	0.577043	0.554267	2.55592	3.22372	3.93446		C18orf1	5.46495	8.06658	4.20837	1.05503	8.8606	7.98959	13.5878	12.0777		C1QTNF3	2.561	2.05082	1.99443	0.445331	0.959874	1.67993	2.6188	2.88407		BDNF	0.394205	0.105404	8.26302	0.981163	3.78509	6.24585	12.3309	6.27618
CACNA1C	3.78577	1.99045	3.32844	0.05183	0.078531	1.47071	2.2893	1.38964		BTBD9	6.85748	3.03464	10.8282	0.188887	0.589499	4.0731	9.48789	5.97343		C1QTNF3	2.16355	2.31284	1.88975	0.66088	0.919144	1.07842	2.17587	3.04814		C1QTNF6	1.39253	2.03261	1.3573	0.357776	0.527401	0.162641	0.274344	0.399359		BHLHE41	0.138284	0.506407	1.17342	0.261041	0.722563	4.67075	4.79739	11.3133
CACNA1F	0.013732	0.007586	0.317167	0.081976	0.424634	0.361242	0.380193	0.219991		C10orf120	0	0	0	0.090977	0	0	0	0		C1QTNF6	1.07027	3.19932	0.771916	0.494483	1.00475	0.175428	0.665044	0.376013		C2orf86	1.0943	0.690667	0.265503	0.220242	0.417658	0.864131	1.35503	1.00778		BIK	0.098973	0	0	0	0.086176	0	0	0.127514
CALCA	0	0	0	0	0	0	0	0		C18orf1	9.54035	8.00156	15.3803	1.87869	4.03553	10.6313	15.4051	11.5448		C2orf86	0.927615	1.12801	0.51822	0.138494	0.548389	0.517072	1.05712	0.722212		C3	1.36625	1.51207	8.02897	7.38828	7.93039	2.92367	11.4547	8.27688		BIN3	6.36055	5.05953	5.60616	0.506562	4.48555	1.86462	5.04849	3.75176
CASP10	0.300414	0.529726	0.346896	0.269246	0.105833	0.240888	0.6193	0.543044		C1QTNF3	3.00808	1.71955	2.4239	1.56583	1.03401	1.66956	2.26121	2.7784		C3	1.0137	2.99871	6.1354	7.00659	9.3977	1.67199	6.6619	5.21111		C4A	0.097962	0	0.035918	0	0	0.016144	0.091828	0.068113		BLOC1S3	3.38453	5.81389	0.948553	0	0.371805	1.3477	1.56466	1.89667
CCDC60	0	0	0.183859	0	0.025262	0	0	0		C1QTNF6	1.26283	3.2344	1.08823	0.204985	0.572144	0.267085	0.353236	0.462508		C4A	0.064766	0.088179	0.028979	0.042528	0.018708	0	0.023036	0.101324		C6	0	0	0	0	0	0	0	0.016061		BMP6	0.454254	0.779701	0.736429	0.06452	0.208807	0.595423	0.535235	0.666335
CCKAR	0.065529	0	0	0	0	0.030386	0.150848	0.114893		C2orf86	1.47437	0.922922	1.11291	0.30164	0.321725	0.645584	1.32685	0.899486		C6	0.028212	0	0.036466	0	0	0.02784	0	0		CABIN1	7.01764	5.91359	8.26646	0.379414	3.20378	4.18553	8.50125	7.21175		BRCA2	0.026025	0.045109	0.054075	0.009703	0.004113	0.004098	0.030704	0.020087
CCL2	0.490822	3.65103	4.9663	4.57071	3.07508	0.125268	2.89036	1.50802		C3	1.15391	1.80877	7.77	7.63242	5.43382	2.26665	6.6513	5.98492		CABIN1	6.91081	9.01127	7.36361	0.837662	2.81142	4.91463	6.00923	7.81917		CACNA1A	8.28932	5.52231	10.2785	0.485675	1.7907	3.35773	7.74398	5.77113		BRD1	16.3015	6.83161	2.62016	0.083611	0.24473	1.25022	2.63539	3.73232
CCR3	0	0	0	0	0	0	0.214448	0		C4A	0.104526	0.036587	0.039074	0.017391	0	0.008094	0.052598	0.128783		CACNA1A	6.04924	7.90384	5.93978	0.511449	2.86012	4.33695	5.00471	6.38664		CACNA1C	2.95976	1.09373	2.18128	0.02495	0.062954	1.13592	2.3423	1.5081		BTBD9	4.58943	1.26565	6.66948	0.253346	0.409246	2.98007	8.93369	4.71653
CCR5	0	0.04355	0	0	0.03332	0	0.101922	0		C6	0.061655	0	0	0	0	0	0	0		CACNA1C	1.38636	1.99095	1.10344	0.095791	0.494809	1.26455	1.37413	1.71867		CACNA1F	0.009345	0	0.212625	0.07969	0.779545	0.319355	0.276068	0.2641		C10orf120	0	0	0	0	0	0	0.052188	0
CD14	0.421332	13.8212	6.3255	2.56578	6.4835	2.40604	8.89934	2.70377		CABIN1	7.37957	7.55479	9.48699	1.16105	1.06305	5.11942	7.71875	7.13536		CACNA1F	0.00938	0	0.303981	0.090897	0.352388	0.301063	0.176381	0.272696		CALCA	0	0	0	0	0	0	0	0		C18orf1	16.1823	9.41681	8.3472	0.632899	5.50751	8.40212	14.2426	12.8335
CD3D	0	0	0	0.059598	0.538447	0.188014	0	0		CACNA1A	7.77107	7.9791	11.0187	0.948187	1.25076	4.61278	6.71256	5.94552		CALCA	0	0	0	0	0	0	0	0		CASP10	0.288129	0.421769	0.735363	0.193188	0	0.172433	0.760445	0.352967		C1QTNF3	1.68507	1.90863	1.95667	0.927306	1.53932	2.0919	1.99212	2.57307
CD4	0.578186	2.28187	2.64351	0.224862	0.321755	0.409087	2.10859	2.10971		CACNA1C	2.97921	1.49011	2.85473	0.049595	0.249444	1.19169	1.93973	1.35597		CASP10	0.236274	0.444816	0.198393	0.188761	0.160046	0.418995	0.486497	0.347072		CCDC60	0.03361	0	0	0.03334	0	0.001402	0	0		C1QTNF6	2.77926	3.83277	0.51616	0.219951	0.555608	0	0.487511	0.710341
CD48	0.097457	0.475697	0.178913	0.312928	1.04044	0.227196	0	0		CACNA1F	0.036275	0	0.276346	0.130912	0.267383	0.361191	0.307855	0.192164		CCDC60	0	0	0	0	0.059283	0.025843	0.073999	0		CCKAR	0.08979	0.039083	0	0	0	0.045234	0	0.035126		C2orf86	0.772699	0.575602	0.788122	0.286505	0.30692	0.317987	1.08915	1.00337
CDC45L	0.155189	0.266464	0	0	0.043834	0	0	0		CALCA	0	0	0	0.129064	0	0	0	0		CCKAR	0.044157	0.036317	0.039875	0	0.076529	0.118018	0.061964	0		CCL2	0.220085	1.69517	3.27604	2.33561	6.35894	0	4.71319	1.7132		C3	2.10278	2.03864	5.34645	5.55266	10.6102	3.71563	5.29389	5.51912
CECR2	2.41438	0.315288	0.613151	0.064084	0.065949	0.103688	0.628468	1.07199		CASP10	0.298752	0.366847	0.226555	0.328508	0.133975	0.195983	0.456719	0.248087		CCL2	1.3203	1.93579	1.109	1.71721	5.17391	0.130802	1.09546	0.892488		CCR3	0	0	0	0	0.795364	0	0	0		C4A	0.070277	0.017612	0.028858	0	0	0.023536	0	0.200724
CELSR1	0.396114	0.161956	0.962454	0.010457	0.013854	0.094603	0.276817	0		CCDC60	0	0	0	0	0.036865	0.026732	0.133915	0.01358		CCR3	0	0	0	0	0.046584	0.037315	0	0		CCR5	0	0	0	0	0	0.122461	0.02545	0.022576		C6	0.070857	0	0	0	0	0	0	0
CFB	0.224501	0.631851	0.371438	1.09943	0.661391	0.442975	0.625265	0.919538		CCKAR	0.044946	0.018203	0.072361	0	0.046947	0.194462	0	0.033263		CCR5	0	0	0.097253	0	0	0	0.116495	0.169636		CD14	0.444558	5.31101	8.89094	2.1295	10.7256	3.17505	11.0783	4.16626		CABIN1	15.7943	8.16565	6.47314	0.243785	1.00442	2.009	5.96213	7.55851
CFLAR	4.322	1.84596	2.02108	1.74173	0.78193	0.880047	2.5096	3.58603		CCL2	0.381014	2.52885	0.663587	2.73858	2.09177	0.142262	2.93925	1.89081		CD14	0.130066	5.25117	3.78594	3.22801	12.6782	2.40059	4.97203	3.48031		CD3D	0	0	0	0.206861	0.807336	0.08217	0	0.400423		CACNA1A	9.5596	3.82956	5.06352	0.446387	1.07441	1.70289	5.06147	5.48087
CHAT	0	0	0	0	0	0.034059	0	0		CCR3	0	0	0	0	0	0	0	0		CD3D	0	0.180746	0.025477	0	0.760453	0	0.11725	0.281831		CD4	0.328777	1.11747	2.58935	0.417376	0.291761	0.627208	2.61391	3.24709		CACNA1C	5.09915	1.11078	1.42482	0.021762	0.063251	0.688448	1.65334	1.12307
CHI3L1	0.191811	0.183543	1.95558	0.480559	0.827155	1.3846	2.84049	6.81672		CCR5	0	0	0	0	0	0	0.13391	0		CD4	0.191036	1.35796	1.34899	0.444233	0.550984	0.450235	1.95372	1.91734		CD48	0	0.084402	0	0.39109	0.860991	0.105702	0	0.13239		CACNA1F	0.010874	0.007447	0.297311	0.029146	0.363565	0.330128	0.31066	0.282911
CHODL	0.432292	0.58563	0.164964	0	0.212115	0.164984	0.206854	0		CD14	0.439039	14.6893	3.85031	3.06644	3.42915	2.79858	8.97055	4.12323		CD48	0	0.134661	0.239647	0.260506	1.30367	0.178553	0.419402	0.052428		CDC45L	0.574932	0.3152	0	0.082977	0	0.029995	0.042363	0.031476		CALCA	0	0	0.023474	0	0	0	0	0
CHRFAM7A	0.208286	0.149027	0.333526	0.075483	0.065756	0.217421	0.154192	0.468043		CD3D	0	0.184961	0	0	0.134427	0.085872	0.180935	0.488809		CDC45L	0.269725	0.219504	0.158603	0.116125	0.025715	0	0.010482	0.035296		CECR2	2.78296	0.135974	0.358294	0.128316	0.047783	0.451627	0.529854	0.803026		CASP10	0.08876	0.432415	0.59505	0	0.164161	0.1067	0.372598	0.308789
CHRM5	0.211564	0.029219	0.536664	0	0.052644	0.098104	0	0.37602		CD4	0.238697	2.10064	2.04557	1.59082	0.252171	0.911795	2.58346	1.97231		CECR2	0.929636	0.551039	0.285125	0.178298	0.154908	0.360383	0.671634	0.787381		CELSR1	0.563357	0.093484	0.433831	0	0.023285	0.127912	0.122638	0.024802		CCDC60	0	0	0.155296	0	0.021632	0	0.031187	0.025304
CHRNA2	1.26254	0.805933	5.90366	0.226094	0.774525	3.77986	4.38593	1.66068		CD48	0	0.167706	0.120489	0.354095	0.664145	0.104051	0.796418	0.100296		CELSR1	0.223214	0.486046	0.306884	0.024635	0.027202	0.12637	0.117812	0.038397		CFB	0.174781	0.478564	0.920807	1.05828	0.634083	0.484434	0.596715	0.624484		CCKAR	0	0	0.118051	0	0.045212	0	0.202953	0.033113
CHRNA3	0.216161	0.180896	0.656149	0	0.183198	0.447258	0	0.040575		CDC45L	0.237954	0.241889	0.14981	0.124634	0.130111	0.02335	0.073297	0.027374		CFB	0.241706	0.673317	0.617272	1.52377	1.56509	0.273449	0.884182	0.717304		CFLAR	3.58774	1.1888	1.49288	0.996479	0.694034	1.99521	1.9473	3.68871		CCL2	0.439865	2.41586	2.02663	2.95199	1.43982	0	1.44547	1.96687
CHRNA5	1.34066	1.19858	0.651797	0	0.088347	0.22051	0.388315	0.209869		CECR2	1.72377	0.328528	0.409859	0.131966	0.102406	0.147431	0.565286	0.639495		CFLAR	2.35622	1.15918	2.24258	2.03423	0.957011	1.42821	3.09076	2.69951		CHAT	0	0	0	0	0	0	0	0		CCR3	0	0	0	0	0	0	0	0
CHRNA7	0.416515	0.464244	1.42614	0	0.088749	0.644845	0.826661	0.080324		CELSR1	0.293794	0.169475	0.62748	0.020286	0.001093	0.086108	0.16211	0.056076		CHAT	0.002373	0.040432	0	0	0	0	0	0		CHI3L1	0.05128	0.298771	1.29987	0.454949	0.945484	0.918122	2.17444	5.99095		CCR5	0	0	0.047987	0	0	0.119565	0.099538	0.040381
CHRNB2	5.22785	9.55371	12.1668	0.062955	0.781829	10.2499	15.8664	5.68635		CFB	0.238896	0.45104	0.809594	1.36553	0.648481	0.389223	0.837939	0.534391		CHI3L1	0.172553	0.280949	1.86122	0.647905	1.47705	0.584322	2.32434	4.91471		CHODL	0.7338	0.886476	0	0.059018	0.222447	0.228264	0.236095	0.335219		CD14	0.477178	11.007	2.37198	1.77852	6.06033	2.57969	5.90157	3.39833
CHRNB3	0	0	0.112367	0	0.034989	0.136927	0.843498	0.057334		CFLAR	4.95459	1.19871	2.22524	1.34807	0.742393	0.888946	2.07855	2.75183		CHODL	0.608834	1.029	0.322902	0	0.157772	0.125808	0.195607	0.371834		CHRFAM7A	0.200437	0	0.442342	0	0.326964	0.068431	0.498708	0.174113		CD3D	0	0	0.09792	0.536053	0.597828	0.161552	0.006862	0.337391
CIT	0.991885	0.43212	8.04521	0.187724	0.331697	3.97881	9.42877	5.1098		CHAT	0	0.020687	0	0	0	0	0	0		CHRFAM7A	0.181137	0.081873	0.081517	0	0	0.126608	0.097646	0.081807		CHRM5	0	0.063091	0.072119	0	0.132727	0.820747	0	0.922955		CD4	0.458447	1.22778	1.62751	0.795962	0.336994	1.10839	1.70505	1.56048
CLDN14	0	0	0	0	0	0	0	0		CHI3L1	0.171499	0.273321	1.92686	0.844396	0.719518	1.27526	1.72621	6.07361		CHRM5	0.180646	0.058626	0.274436	0	0	0.41536	0.231312	0.61752		CHRNA2	0.707041	0.346592	7.8164	0.105908	1.37016	2.78686	4.0813	3.0347		CD48	0.077169	0.256135	0.056118	0.349991	1.71273	0.017977	0.492217	0.264448
CLINT1	11.2545	14.2935	13.8414	0.548499	0.775065	11.3183	15.2266	9.09657		CHODL	1.12439	0.956155	0.219188	0	0.130519	0.477048	0.075289	0.226217		CHRNA2	0.217319	0.176321	3.68912	0.176915	1.50516	2.42216	1.83529	1.49292		CHRNA3	0.149528	0.14254	0.417504	0	0	0.206989	0.465505	0.141492		CDC45L	0.117664	0.359698	0.158317	0.051653	0.057585	0.022114	0.073888	0
CLOCK	1.50557	1.04693	3.45288	0.125212	0.214076	2.93329	5.72361	1.62346		CHRFAM7A	0.146638	0.038247	0.329011	0	0.097291	0.141096	0.169133	0.098276		CHRNA3	0.164713	0.137988	0.59299	0	0.31582	0.319839	0.382717	0.081399		CHRNA5	1.24633	0.882488	0.911373	0.036367	0.149166	0.303227	0.436589	0.158454		CECR2	0.988591	0.125471	0.379033	0	0.082818	0.074817	0.300317	0.912001
CLTCL1	1.31543	1.50537	0.754121	0.019191	0.076733	0.618939	0.383015	0.54154		CHRM5	0.232372	0	0.645075	0	0.038412	0.278534	0.132946	0.885989		CHRNA5	1.23458	1.67079	0.619297	0	0.137896	0.251938	0.232443	0.126183		CHRNA7	0.213622	0.214181	0.549129	0	0.433719	0.501643	0.908557	0.755244		CELSR1	0.640913	0.18474	0.381764	0.021915	0.018453	0.040087	0.035064	0.066151
CMYA5	0.252482	0.034367	0.220523	0.030211	0.160004	0.257893	0.482945	0.829588		CHRNA2	0.818783	0.455787	5.17618	1.04015	2.35161	3.29986	3.20652	2.08559		CHRNA7	0.030454	0.373338	0.613928	0	0.207172	0.652589	0.556888	0.71369		CHRNB2	5.77851	4.56381	12.1132	0.037194	2.3832	6.14225	15.8721	8.36607		CFB	0.170817	0.312859	0.786692	0.999363	0.661996	0.766257	0.524176	0.468018
CNO	8.99502	15.6387	6.63356	0.729964	5.35036	5.57713	9.84947	3.48182		CHRNA3	0.120372	0.128724	0.481159	0.058101	0.434173	0.146144	0.440529	0.166581		CHRNB2	4.92524	10.3075	7.01094	0	2.28526	7.7272	10.7543	9.0115		CHRNB3	0	0	0.382057	0	0.153597	0.205341	0.538497	0.143653		CFLAR	1.72554	0.951236	2.98731	1.34583	0.957133	1.09961	1.89545	2.9424
CNTF	1.07508	0.258724	0.257584	0	0	0.457202	0.40156	1.74565		CHRNA5	0.969128	1.20171	0.723992	0.065419	0.171511	0.186973	0.296805	0.16677		CHRNB3	0.008475	0	0.32665	0	0.316567	0.083748	0.487138	0.115007		CIT	0.958148	0.180457	4.0141	0.156959	0.398488	3.07719	8.12397	6.31209		CHAT	0.143434	0.020189	0	0	0	0	0	0
COG2	2.18112	3.03563	2.50388	1.29266	1.87672	2.74254	4.59477	4.68735		CHRNA7	0.263482	0.204701	0.599611	0.045705	0.065643	0.402989	0.770625	0.662185		CIT	0.650456	0.519214	4.67392	0.272321	2.00819	4.26923	6.03063	7.39041		CLDN14	0	0	0	0	0	0	0	0		CHI3L1	0.088824	0.137926	1.20171	0.592568	0.815243	0.907942	1.82868	6.49748
CPXM2	0.034462	0.113972	0.929332	0	0.085521	0.660167	0.157592	0.303772		CHRNB2	5.44306	7.00865	12.5201	0.182784	1.12558	8.08154	14.3399	7.99796		CLDN14	0	0	0	0	0	0	0	0		CLINT1	14.4274	11.0155	7.50407	0.54737	0.736309	10.8487	14.568	8.51046		CHODL	0.634605	0.984633	0.306262	0	0.22368	0.018774	0.111171	0.225809
CRP	0.125322	0	0	0	0	0	0	0		CHRNB3	0	0.065177	0.371238	0.033681	0.210246	0.032233	0.434526	0.119661		CLINT1	11.5038	14.712	8.77071	1.32045	2.02063	9.30678	13.8591	10.3929		CLOCK	1.19947	0.176984	1.60989	0.170827	0.163487	2.42481	4.90582	2.52492		CHRFAM7A	0.053765	0.030265	0.204972	0	0.067516	0.100219	0.083432	0.068158
CSF2RA	0.109912	0.210875	0.599878	0.31049	0.633473	0.205934	0.454744	0.201949		CIT	0.759309	0.485206	8.83802	0.319836	0.597268	3.44873	8.31971	6.53079		CLOCK	0.92571	1.21304	1.64764	0.394494	0.815876	1.89906	5.66653	2.47775		CLTCL1	1.19585	1.19605	0.495885	0.034014	0.169784	0.489846	0.570822	0.704867		CHRM5	0.083761	0.048329	0.257095	0.062459	0.05295	0.052757	0.131761	1.05824
CSF2RA	0	0	0	0	0	0	0	0		CLDN14	0	0	0	0	0	0	0	0		CLTCL1	1.41683	1.49135	0.433127	0.067206	0.222967	0.507524	0.473196	0.522225		CMYA5	0.28293	0.051477	0.309768	0.016232	0.260654	0.205362	0.744607	0.673692		CHRNA2	1.4888	0.318277	4.13202	0.368928	0.915676	2.58909	3.8878	1.94365
CSF2RB	0.046128	0.2905	0.056968	0	0.015443	0.027612	0.143833	0.055153		CLINT1	11.948	12.6188	15.1508	1.38666	1.79081	9.36441	15.3656	9.11231		CMYA5	0.254585	0.109956	0.124363	0.086919	0.273643	0.338803	0.493954	0.658109		CNO	7.12556	14.4104	7.2896	0.674872	9.29607	4.6234	5.78907	6.52396		CHRNA3	0.292615	0.177659	0.805823	0	0.119628	0.151926	0.262584	0.170154
CSNK2A1	9.24914	11.0988	10.7706	0.594216	0.780259	5.71611	8.30491	5.04142		CLOCK	2.05367	0.749608	5.73673	0.193001	0.383698	2.04818	5.82124	1.74141		CNO	4.88751	14.0649	4.58715	0.996957	6.25057	3.75044	3.6253	6.37164		CNTF	0.669674	0.083685	0.399642	0	0	0.49396	0.282075	0.600675		CHRNA5	0.187636	0.85712	0.738503	0.070195	0.31121	0.20712	0.510279	0.209854
CTLA4	0	0.13867	0	0	0	0	0	0		CLTCL1	1.54529	1.33533	0.733961	0.092697	0.120836	0.324428	0.450614	0.781038		CNTF	0.379491	0.04939	0.029998	0	0.209568	0.411641	0.18243	0.559474		COG2	3.06149	1.87522	2.06748	1.00443	2.50634	2.72385	3.32113	3.8707		CHRNA7	0.391225	0.099043	0.485201	0	0.27024	0.5641	0.390627	0.341633
CYP1A2	0	0	0	0	0	0	0	0		CMYA5	0.315469	0.047202	0.283783	0.080904	0.185263	0.203697	0.554258	0.559166		COG2	2.5592	3.24723	2.56668	1.86412	2.8418	2.30841	3.92401	4.34292		CPXM2	0.070039	0.081939	0.683971	0.022944	0.323719	0.427011	0.35464	0.428623		CHRNB2	11.818	3.06526	6.76784	0.19702	0.742158	4.70897	11.1382	6.04337
CYP21A2	0.750008	0.156406	0	0.103545	0.014127	0	0	0.289439		CNO	5.19336	16.1052	7.12511	2.42961	3.38199	6.24154	5.95679	6.76632		CPXM2	0.048036	0.018842	0.45908	0	0.261198	0.588206	0.174817	0.491826		CRP	0.085283	0.074745	0	0	0	0	0	0		CHRNB3	0	0	0.219044	0	0.137457	0.061053	0.480107	0.154648
CYP26B1	0.819536	1.03594	7.62452	0.058613	0.656902	13.2951	17.0778	1.93129		CNTF	0.560519	0	0.395442	0	0	0.317528	0.365392	0.42734		CRP	0	0.069456	0.05977	0	0.073678	0	0	0		CSF2RA	0.058119	0.239185	1.10902	0.207666	0.592631	0.168433	0.288782	0.394103		CIT	0.943689	0.323403	4.90259	0.124873	0.236736	1.77421	6.7187	4.55259
CYP26C1	0.026837	0.198661	0.081017	0	0.043925	0.040928	0.201806	0.092215		COG2	2.22595	2.68941	2.36951	1.91811	1.77047	2.65623	4.35252	3.62392		CSF2RA	0.187698	0.20991	0.399028	0.36475	0.692895	0.200749	0.547264	0.345249		CSF2RA	0	0	0	0	0	0	0	0		CLDN14	0	0	0	0	0	0	0	0
CYP2C18	0	0	0	0	0.028038	0.078375	0.131469	0		CPXM2	0.046955	0.019412	0.73157	0.0041	0.14983	0.356347	0.403073	0.379183		CSF2RA	0	0	0	0	0	0	0	0		CSF2RB	0	0.129055	0	0	0	0.020564	0.216182	0.254003		CLINT1	11.3512	7.68491	13.4888	0.900212	0.897352	7.76933	15.9624	9.08451
CYP2D6	1.36262	0.201548	0.028723	0.118613	0.080696	0.119381	0.273401	0.898709		CRP	0	0	0	0	0	0.065997	0.105002	0		CSF2RB	0	0.171051	0.056648	0.082384	0.053744	0	0.022618	0.141315		CSNK2A1	12.9913	9.11401	6.2559	0.547334	1.61163	6.00545	9.82793	5.14739		CLOCK	0.958245	0.209001	3.66114	0.328817	0.227381	2.64432	5.41614	2.17279
CYP2E1	9.96719	6.56964	7.93725	0.563478	3.0999	3.08136	4.27394	3.12788		CSF2RA	0.213937	0.226867	0.613194	0.377604	0.241625	0.121238	0.536987	0.43013		CSNK2A1	10.6851	11.2927	8.15814	1.08078	2.17361	4.53917	8.6173	5.07331		CTLA4	0	0	0	0	0	0	0.182368	0		CLTCL1	1.89768	0.91847	0.455073	0.02011	0.07188	0.249748	0.390415	0.577376
CYP3A4	0.214981	0	0	0	0	0	0	0		CSF2RA	0	0	0	0	0	0	0	0		CTLA4	0	0	0.076372	0	0	0	0.091482	0		CYP1A2	0.031491	0	0	0	0	0	0	0		CMYA5	0.202511	0.022748	0.175119	0.032651	0.182862	0.205257	0.380343	0.61262
CYP3A5	0.06292	0.011712	0.067799	0	0.050373	0.033299	0	0.104536		CSF2RB	0.021284	0.214781	0.075693	0	0.022536	0.049025	0.104702	0.064072		CYP1A2	0.037129	0.030124	0	0	0	0	0	0		CYP21A2	0.73051	0.116287	0.385251	0	0.275566	0.056093	0.242069	0.058463		CNO	13.5006	18.0568	4.97787	1.2239	4.03192	4.46342	4.80068	5.78298
CYP4F8	0	0	0	0	0	0	0	0		CSNK2A1	12.7461	11.0961	12.1366	0.837163	1.67833	5.77773	9.33437	4.65489		CYP21A2	0.474049	0.493089	0.134096	0.072388	0	0.025681	0.039748	0		CYP26B1	0.353947	0.914707	5.37728	0.069257	2.68624	11.4797	13.7381	5.99422		CNTF	0.807743	0.077134	0.415592	0	0.070233	0	0.273964	0.68123
DAO	0.060819	0.0108	0	0	0.079452	0	0	0		CTLA4	0.055839	0	0	0	0.181068	0	0.18758	0		CYP26B1	1.6876	3.42132	3.31547	0.138084	2.05493	6.07021	4.29061	5.96436		CYP26C1	0.020292	0.007825	0.18186	0	0	0.023152	0.065002	0.105492		COG2	1.32052	1.91594	2.96841	0.859372	2.48048	2.95275	4.43095	3.40469
DAOA	0	0	0	0	0	0	0	0		CYP1A2	0.037281	0	0	0	0	0	0	0		CYP26C1	0.050921	0.306059	0.001089	0	0.014726	0	0.224299	0.13071		CYP2C18	0	0	0	0	0	0.028779	0.294423	0.060813		CPXM2	0.212406	0.018689	0.685722	0	0.102802	0.240161	0.203608	0.191559
DBH	0.346598	0.199592	0.209099	0	0.134091	0.693144	0.542718	0.74336		CYP21A2	0.457037	0.160809	0.133019	0.121676	0	0.086153	0	0.027681		CYP2C18	0	0.031652	0.034282	0	0.066244	0.026532	0.119821	0		CYP2D6	0.676588	0.124705	0.264711	0.011837	0	0.134414	0.049234	0.464324		CRP	0.198467	0	0.248142	0	0	0	0	0
DCDC2	0.348309	0.304469	1.73468	0.058326	0.051515	0.174163	0.864597	0.892542		CYP26B1	0.812795	1.17471	6.94613	0.057242	1.51808	17.2433	10.2474	5.26002		CYP2D6	0.580529	0.485199	0.470837	0	0.06188	0.089758	0.147737	0.320431		CYP2E1	8.17059	7.5238	6.43569	0.541927	5.20581	2.99586	5.09268	3.22575		CSF2RA	0.130547	0.271901	0.358999	0.308702	0.60221	0.056669	0.432916	0.17863
DDC	0	0	0	0	0	0.050361	0	0		CYP26C1	0.112077	0.076959	0.006546	0	0.05847	0	0.073452	0.052674		CYP2E1	11.7936	6.59123	8.06024	0.551468	2.90582	3.51746	3.42168	3.95199		CYP3A4	0.101513	0.004361	0.078701	0	0	0	0	0.054091		CSF2RA	0	0	0	0	0	0	0	0
DDO	0	0.03289	0.277011	0.633904	0.551709	0.794901	0.522212	1.64743		CYP2C18	0	0	0	0	0.041476	0.116238	0	0		CYP3A4	0.074924	0.078215	0.010679	0	0	0	0	0		CYP3A5	0.14195	0.08362	0	0.028231	0	0.074412	0.12189	0.044725		CSF2RB	0	0.051177	0.037269	0	0	0	0.05824	0.111248
DGCR14	11.7915	13.1373	8.61218	0.688778	4.90235	8.88104	7.66718	7.22612		CYP2D6	0.542912	0.159591	0.417209	0.165149	0.148233	0.092881	0.23954	0.302161		CYP3A5	0.19481	0.095138	0.066169	0.038129	0	0.05894	0	0.014518		CYP4F8	0	0	0	0	0	0	0	0		CSNK2A1	11.7012	7.29939	9.01349	0.515968	1.0865	3.8248	7.36952	5.05504
DGCR8	15.9876	6.81654	4.90354	0.3635	0.362465	2.23795	4.25802	3.46415		CYP2E1	9.75964	6.19777	8.80836	1.60175	4.09079	3.26493	4.52959	3.52868		CYP4F8	0	0	0	0	0	0	0	0		DAO	0.186247	0.102993	0	0	0	0.014979	0	0.208415		CTLA4	0	0	0	0	0	0	0	0
DGKH	0.224382	0.095623	0.970682	0.114561	0.065177	0.650335	1.22561	0.677148		CYP3A4	0.158989	0.031732	0	0	0	0.026185	0.045337	0.005939		DAO	0.140213	0.039124	0	0.148491	0.070235	0.063421	0.057788	0.042651		DAOA	0	0	0	0	0	0	0	0		CYP1A2	0	0	0	0	0	0	0	0
DISC1	0.175145	0.481566	0.900587	0.066845	0.05884	0.241233	0.584936	0.810637		CYP3A5	0.177315	0.038661	0.046711	0.054946	0.139072	0.048261	0.001719	0.058323		DAOA	0	0	0	0	0	0	0	0		DBH	0.290455	0.436816	0.919959	0.012231	0	0.305297	0.529459	0.650589		CYP21A2	0.570218	0.324014	0.135025	0	0.054593	0	0.066064	0.083046
DKK1	0.903763	1.91217	0.381472	0.117084	0.157242	0.26465	0.727341	0.748758		CYP4F8	0	0	0	0	0	0	0	0		DBH	0.175266	0.28644	0.240715	0	0.304211	0.573881	0.542313	0.600237		DCDC2	0.303664	0.091773	0.230535	0.068918	0	0.571991	0.800463	0.587111		CYP26B1	0.822576	0.630586	4.40177	0.122012	0.819037	11.5794	13.3563	6.15792
DKK4	0.22964	0.344204	0	0	0	0	0	0.147053		DAO	0.102053	0.013643	0	0	0	0.028025	0.00364	0.092066		DCDC2	0.378864	0.259712	0.381759	0.08263	0.306338	0.240775	0.498074	0.573098		DDC	0	0	0	0	0	0.027549	0	0.018217		CYP26C1	0	0.069503	0.010027	0	0.02209	0.044019	0.136681	0.109693
DLG1	2.9895	2.23744	10.7495	0.681135	1.01529	8.82636	13.9238	8.11041		DAOA	0	0	0	0	0	0	0	0		DDC	0	0.0303	0	0	0.102071	0	0.03985	0		DDO	0.102685	0.178769	0.17032	0.592522	1.27506	1.96051	0.721197	2.07106		CYP2C18	0.090444	0.031396	0.110301	0.067443	0.105077	0	0	0.051089
DLX1	14.4311	17.2006	11.3114	0.244464	0.741582	3.84835	2.45243	6.03774		DBH	0.233948	0.221335	0.304717	0	0.209911	0.587562	0.72241	0.500458		DDO	0	0.083627	0.470959	1.12549	1.55274	1.10264	1.42382	1.78351		DGCR14	9.63778	12.4763	6.20986	1.0316	8.85211	7.34713	7.22787	7.12441		CYP2D6	1.38193	0.209556	0.416817	0.027715	0.031327	0.076258	0.132433	0.440592
DNMT3B	2.33783	0.590351	0.117661	0	0.01584	0.014759	0	0.05037		DCDC2	0.469168	0.259988	1.77856	0.157798	0.108701	0.372745	0.714349	0.624501		DGCR14	7.73199	11.4389	8.40924	1.64585	5.80345	7.09424	4.84616	8.30415		DGCR8	13.9269	4.28618	3.49559	0.241805	0.226006	2.28676	3.81244	4.11586		CYP2E1	13.6073	7.31755	8.80552	0.556914	2.90962	1.68421	3.52747	2.75883
DPM1	11.301	9.00489	9.42617	5.88543	8.0188	6.58697	12.6506	10.5131		DDC	0	0.001687	0	0	0.117504	0.028791	0.100899	0.08288		DGCR8	10.3943	6.95628	2.91231	0.240403	1.0912	1.97246	3.57129	3.51586		DGKH	0.238495	0	0.150594	0.055488	0	0.474063	0.844912	0.495506		CYP3A4	0.015054	0.043012	0.024151	0	0	0	0.00592	0.071684
DRD1	0.794494	1.70335	3.04542	0.040347	0.104363	9.55822	6.14611	2.40296		DDO	0.1042	0.216865	0.460708	1.35451	1.07498	0.511913	0.671697	1.79451		DGKH	0.148476	0.086457	0.390476	0.084695	0.117378	0.331095	0.703601	0.64108		DISC1	0.277106	0.13219	0.389124	0.058972	0	0.420922	0.339444	0.88921		CYP3A5	0.050905	0.194377	0.07721	0	0.083187	0.088001	0.156745	0.114737
DRD2	0.493805	0.243215	1.63988	0	0.551983	0.753552	1.51043	0.111784		DGCR14	6.68737	14.6457	9.54168	3.12746	3.49919	9.34306	7.05641	8.9696		DISC1	0.15167	0.202133	0.300948	0	0.121819	0.304067	0.606759	0.808674		DKK1	1.21552	2.43624	0.877603	0.171512	0.260723	0.324976	0.893049	0.315083		CYP4F8	0	0	0	0	0	0	0	0
DRD3	0.026501	0.038692	0.257157	0	0	0	0	0		DGCR8	11.0698	4.89244	4.45222	0.486977	0.72517	2.19795	3.66514	3.50256		DKK1	0.670819	1.21947	1.18822	0.139806	0.745534	0.300944	1.28015	0.739452		DKK4	0.171211	0.188325	0	0.017987	0.313557	0	0	0		DAO	0.079117	0.008956	0.048261	0.047454	0	0	0	0.003293
DRD4	1.499	0.801095	0.977117	0.13771	0.377503	0.184268	0.154197	1.73592		DGKH	0.353658	0.038698	0.925612	0.073916	0.066291	0.62924	1.14795	0.45544		DKK4	0.042676	0.388363	0.070896	0	0	0.026241	0.091076	0.109324		DLG1	4.17705	1.26216	5.48689	0.727389	0.909329	12.3964	14.5908	12.7079		DAOA	0	0	0	0	0	0	0	0
DRD5	0.096449	0.260685	2.48034	0	1.01631	1.5672	2.40374	2.51891		DISC1	0.243833	0.226104	0.854446	0.034846	0.121376	0.174549	0.553742	0.684593		DLG1	3.13244	2.39749	6.95431	1.27661	2.71536	8.00122	14.5852	11.0929		DLX1	15.1126	10.7382	7.29877	0.188288	1.52767	2.90721	3.72558	2.40785		DBH	0.790852	0.273014	0.334264	0	0.090117	0.602568	0.400065	0.448687
DYM	8.25919	15.0814	7.58452	1.3345	2.4531	6.62773	7.44227	3.63392		DKK1	0.800477	2.01137	1.14218	0.319539	0.501309	0.495425	0.525886	0.598918		DLX1	7.25165	15.9777	8.01556	0.111566	1.49704	3.24987	3.7419	3.44892		DNMT3B	2.44899	0.881543	0.144688	0.027577	0	0.119375	0.095046	0.230205		DCDC2	0.23205	0.156105	0.853443	0	0.154392	0.241385	0.710017	0.569019
EBF3	0.2196	0.517479	0	0	0	0.085273	0.076718	0		DKK4	0.085703	0.135945	0	0	0.090745	0	0.103277	0		DNMT3B	1.06294	0.706311	0.062878	0	0.037424	0.128945	0.023517	0.042806		DPM1	10.6621	11.2593	6.57439	3.85414	14.9812	6.2463	11.9625	6.86304		DDC	0	0	0.032387	0	0.036611	0.054533	0.034049	0
EEF1E1	6.71007	7.46443	8.44555	7.11378	12.835	15.0586	14.2829	6.81074		DLG1	3.55887	1.28119	14.537	1.28016	2.09584	8.24317	15.7559	9.46244		DPM1	11.4726	7.57224	9.43918	5.61213	8.27921	6.60909	11.4397	7.63598		DRD1	1.82155	2.36573	2.91302	0.041999	0.18611	6.97459	6.2392	2.91808		DDO	0	0.041758	0.182456	0.815795	1.50238	1.95869	0.856006	2.18061
EGF	0	0	0.084509	0	0.011533	0.053293	0.154268	0		DLX1	7.10068	12.5729	7.76136	0.628739	1.93179	3.7137	3.78647	3.9377		DRD1	1.27175	3.75173	3.01119	0.167474	0.623453	5.51234	5.54186	3.61557		DRD2	0.352236	0.523139	2.10584	0	1.33942	1.03241	1.20056	0.718463		DGCR14	18.1621	16.7233	6.58988	1.24108	3.42377	5.57442	5.22488	5.96368
EGFR	0.588532	0.895134	0.899597	0	0.02465	0.307231	0.384339	2.12319		DNMT3B	1.727	0.444884	0.217489	0	0	0.057401	0.121282	0.14098		DRD2	0.256031	0.296286	1.08039	0	0.833959	0.809318	0.472681	0.431656		DRD3	0	0	0	0	0	0.003384	0	0.031963		DGCR8	12.5703	3.69043	3.29289	0.170516	0.503979	1.80109	3.30813	3.38261
EGR4	0	0.450473	10.8951	0.502192	5.1413	9.30624	9.50436	5.96808		DPM1	10.6283	8.33533	9.06058	7.29314	9.42246	5.10705	13.6425	7.13227		DRD3	0	0	0.084662	0	0	0	0.050361	0.036667		DRD4	0.718251	0.872988	1.09399	0.389321	0.872263	0.668608	0.475985	0.684152		DGKH	0.128601	0.012419	0.862349	0.14889	0.045079	0.555728	0.635217	0.368383
EIF2B1	16.9095	15.2488	7.62545	0.891598	3.29811	5.1129	14.8265	9.38196		DRD1	1.26762	1.45151	3.73455	0	0.728056	6.73472	5.90894	3.29949		DRD4	0.366666	1.24917	0.563478	0.367683	1.02389	0.406675	0.140535	0.409285		DRD5	0.160561	0.201099	1.05272	0.039272	0.30004	1.08592	2.62172	1.47153		DISC1	0.397965	0.215481	0.510953	0.068628	0.044336	0.466137	0.523182	0.75522
EIF2B2	12.5247	17.6478	13.6058	2.87451	9.39729	10.6109	17.7171	9.26218		DRD2	0.128833	0.364465	0.737016	0.137502	0.468494	2.33908	1.02758	0.658795		DRD5	0.316892	0.331767	1.44104	0	1.00332	2.35926	3.67657	2.61171		DYM	10.7005	12.5043	6.8399	1.41091	3.0502	6.26271	8.56616	4.60024		DKK1	1.71638	1.41225	1.01022	0.248747	0.20375	0.420216	0.805732	0.960125
EIF2B3	7.94894	11.3012	8.72489	3.5987	9.90914	9.13144	8.81059	6.8352		DRD3	0	0	0.081959	0	0	0.036884	0	0.035553		DYM	10.6316	12.6132	6.70234	1.16633	3.12325	5.00906	8.35984	5.34116		EBF3	0.002025	0	0	0	0	0	0.064867	0.055507		DKK4	0.010696	0.115103	0.296079	0	0	0	0	0.037543
EIF2B4	14.0247	13.8147	7.36194	7.53092	8.58357	8.26005	8.91016	8.59724		DRD4	0.644454	1.18672	0.281519	0.774059	0.301085	0.385642	0.448987	0.648335		EBF3	0	0.145784	0.040197	0	0.025541	0	0.020388	0.045164		EEF1E1	10.5017	7.88987	7.79249	10.3653	15.3245	16.3571	14.7743	13.5876		DLG1	2.88193	1.81256	13.3115	0.772391	1.03062	8.25689	15.5921	10.4222
EIF2B5	13.9121	12.6006	8.75415	1.10189	3.07684	8.6196	9.61654	6.94585		DRD5	0.244931	0.388693	1.3552	0.129834	0.642567	1.66857	2.67878	2.28164		EEF1E1	10.1404	6.50685	10.5575	7.59218	17.3159	13.215	18.5267	10.8053		EGF	0.078423	0	0	0	0	0.094218	0.233857	0.157454		DLX1	18.2601	15.1286	7.72606	0.197161	1.31156	4.15149	3.34153	2.45869
ENTPD4	6.07115	5.64901	8.82627	0.28903	0.854959	6.12712	11.8561	4.46403		DYM	9.59945	12.464	7.47202	2.16239	2.39413	4.9769	8.26963	4.88437		EGF	0.031445	0.038529	0.057929	0	0.041976	0.117095	0.219811	0.15788		EGFR	1.26476	0.396491	1.00267	0.026678	0.013268	0.138162	0.704154	2.24337		DNMT3B	1.66025	0.461393	0.145048	0	0	0.048273	0.064083	0.166561
EPHA6	0.751009	0.96731	2.70318	0.130722	0.052409	1.71997	2.09861	1.39793		EBF3	0	0.300057	0	0	0	0.062054	0.105211	0.063137		EGFR	0.339482	1.10992	0.306986	0.081263	0.048751	0.229066	0.788994	2.50456		EGR4	0.039371	0.303091	15.9525	0.154074	10.5688	7.03074	10.5184	4.86006		DPM1	6.79237	9.19367	10.9816	6.08305	11.9193	9.42903	11.9016	6.52905
ERBB2	1.41808	1.57112	1.53625	0.235757	0.342751	0.767149	0.787864	2.49311		EEF1E1	9.93312	10.2013	8.2012	6.30357	16.1531	14.273	18.1079	9.94726		EGR4	0	0.266043	5.21023	0.431725	5.14375	5.93508	5.51053	4.86352		EIF2B1	16.1979	15.0609	8.46592	1.0398	5.33065	6.28112	11.992	9.91283		DRD1	2.34969	1.43213	2.73204	0	0.84786	4.67965	6.17713	3.32464
ERBB3	0.343678	0.221217	1.53688	0.217015	0.603785	1.09261	4.37635	4.41171		EGF	0	0	0.097393	0.025504	0.01683	0.116593	0.32535	0.181533		EIF2B1	15.0804	15.4002	7.6804	1.6451	5.11535	6.20117	13.3652	9.17882		EIF2B2	11.7431	18.0823	10.2063	2.56495	13.072	9.69561	12.8116	9.64552		DRD2	0.681743	0.425183	1.07435	0	2.48197	1.6256	1.63509	1.19568
ERBB4	1.78383	2.06648	2.13113	0.09427	0.167945	0.918264	3.06466	4.11683		EGFR	0.787677	0.572481	0.945176	0.090037	0.029909	0.239739	0.505698	1.61238		EIF2B2	11.4523	16.6083	11.6571	3.55877	11.2082	8.80083	12.6383	9.66021		EIF2B3	10.0344	12.0165	6.24021	2.6104	13.6464	9.18743	10.4961	7.18457		DRD3	0	0	0.04149	0	0.035058	0	0	0
ESR1	0	0	0.067694	0	0.020268	0.037771	0.186238	0		EGR4	0.039682	0.173656	10.073	1.56856	2.68563	10.2307	8.6591	5.77229		EIF2B3	13.2711	12.2927	9.71505	3.00988	11.8457	8.29938	10.3554	7.20864		EIF2B4	13.8628	13.6242	5.39855	5.2465	13.3392	7.6252	8.54754	7.92241		DRD4	3.71352	1.98947	0.300051	0.034206	0.092885	0.167488	0.162924	0.515501
ESR2	0.146795	0.053457	0.089427	0	0.048157	0.045177	0.107589	0		EIF2B1	14.7007	16.82	9.75504	1.92742	3.8381	6.85358	14.5735	10.0702		EIF2B4	13.1461	13.7364	8.2609	6.51233	11.7601	8.19611	8.11744	7.98991		EIF2B5	13.1334	9.62774	6.39735	1.08615	6.13685	7.2492	8.77183	6.36833		DRD5	0.653889	0.478509	1.02816	0	0.560184	1.64542	3.22332	1.8923
FAAH	8.10414	7.80985	6.29243	2.17323	6.46877	8.45912	7.96529	8.2643		EIF2B2	8.92262	18.2402	10.5099	7.01996	9.37415	11.8227	12.7402	10.2312		EIF2B5	13.3105	10.9759	8.32153	1.38858	4.79857	7.40093	8.60676	7.7377		ENTPD4	7.02592	2.7614	6.13041	0.391517	0.958178	5.85929	13.788	7.05863		DYM	8.61881	9.70969	7.02445	1.40829	3.00216	5.38695	9.35001	5.3943
EGR2	0	1.37943	5.71944	0.132835	0.356056	2.65826	5.70859	1.71182		EIF2B3	9.25009	10.4581	9.00765	5.02653	9.83172	7.51499	11.0876	7.79593		ENTPD4	6.07784	5.47003	5.41667	0.607303	3.34751	4.89639	8.46309	7.79734		EPHA6	1.04889	0.362801	1.10595	0.077231	0.387335	1.05019	2.52076	1.03751		EBF3	0	0.071648	0.108999	0	0	0	0.027427	0.085707
FAM126B	1.99357	2.33849	7.30574	0.227453	0.179639	3.29718	9.10701	2.2638		EIF2B4	11.1495	13.9632	8.02265	7.3937	7.91747	7.4466	8.44033	8.34288		EPHA6	2.14242	1.725	1.43524	0.123101	0.199416	1.71834	2.0675	1.25323		ERBB2	1.98986	1.28869	1.48759	0.191994	0.83318	0.675324	0.843301	1.84267		EGF	0	0	0.081614	0	0.057527	0.12635	0.159925	0.06931
FAM3B	0	0	0	0.123289	0.278281	0.041149	0	0		EIF2B5	11.3475	10.9815	10.7862	1.99046	4.40868	7.84539	10.4013	7.44981		ERBB2	0.962706	2.43669	1.22557	0.503864	0.546656	0.645422	0.796011	2.28455		ERBB3	0.323831	0.296184	1.0577	0.353233	0.928129	6.45133	4.41813	9.39109		EGFR	0.59778	0.134922	0.498625	0.047976	0.085801	0.245226	0.500845	2.42712
FAM83F	0.102389	0.209493	1.05401	0	0.111724	0.374906	0.387593	0		ENTPD4	8.01884	4.45979	13.3641	0.6421	1.49978	5.22469	13.9061	6.64476		ERBB3	0.209621	0.450182	0.783837	0.485108	1.94782	3.01935	4.82156	6.34798		ERBB4	3.8174	0.496204	1.54089	0.122034	0	1.38052	2.26161	3.88998		EGR4	0	0.127218	4.60373	0.407152	3.2266	5.97508	7.52811	5.59807
FAM8A1	6.04122	16.7016	6.15675	0.078585	0.218272	3.89444	8.83752	4.56464		EPHA6	1.99317	0.813317	4.04837	0.124204	0.286977	1.05454	2.5088	0.713614		ERBB4	1.12041	1.94641	0.980183	0.161448	0.63783	1.36295	3.11779	4.10321		ESR1	0.032958	0	0.091319	0	0	0.057351	0.119976	0.021831		EIF2B1	15.8709	15.1811	9.76694	1.08638	4.0887	4.07897	13.4799	7.87001
FBP1	0	0	0.27502	0.09197	0.828438	0.536039	0.229046	0.613984		ERBB2	1.2427	1.852	1.78607	0.691058	0.381474	0.666099	0.635312	1.84825		ESR1	0.013534	0.045143	0	0	0	0	0.088254	0.021613		ESR2	0.099	0.08716	0.107749	0	0	0.045731	0.214281	0.078334		EIF2B2	17.6396	17.2339	11.4665	3.185	7.71734	9.38853	13.4379	8.90144
FCRL3	0	0	0	0	0	0	0.096426	0		ERBB3	0.363365	0.253958	1.99243	0.738219	0.623797	2.06142	3.22895	6.66363		ESR2	0.132199	0.053265	0.057681	0	0.057277	0.02263	0.035026	0		FAAH	5.59035	8.02143	6.41751	1.29609	9.84387	9.50811	6.49097	9.22288		EIF2B3	11.4918	13.025	10.2891	3.21004	11.0446	7.50479	11.2721	6.77993
FGA	0	0.017575	0	0	0	0	0	0		ERBB4	2.55982	0.510915	3.34037	0.184444	0.196771	0.80814	2.63971	2.58866		FAAH	6.34624	8.84175	6.9584	2.24078	11.1653	8.55499	7.50741	7.87317		EGR2	0.151292	1.65125	5.30617	0.195702	1.31986	3.16418	4.64935	1.72319		EIF2B5	16.7143	9.34824	9.06099	1.29193	3.78556	7.05801	9.34282	6.57941
FGF18	0.78406	0.802825	0.495418	0	0.199636	0.412617	0.621222	0.473154		ESR1	0.065305	0	0.049671	0	0.022783	0.085789	0.168772	0.00447		EGR2	0.113134	0.857952	1.61068	0.235696	1.19037	1.7999	2.7347	1.54331		FAM126B	2.67627	0.93018	2.03888	0.138049	0.542798	2.40264	7.07619	2.25615		ENTPD4	4.82379	2.05174	8.05499	0.371093	0.794289	3.02156	12.1477	5.20399
FGF2	0.971612	0.587664	0.471303	0.109789	0.51433	0.750299	0.751609	6.00429		ESR2	0.148093	0.066154	0.236038	0	0.034899	0	0.081077	0.012363		FAM126B	1.30814	2.05551	1.35225	0.203001	1.59808	2.4097	7.0014	3.34064		FAM3B	0	0	0	0	0.555184	0.090658	0	0.022806		EPHA6	0.965315	0.715631	2.33137	0.272855	0.189141	0.8275	1.61893	0.763128
FGF20	0	0.124925	0	0	0.066095	0.035786	0	0.334932		FAAH	5.18809	8.52058	7.25868	2.85376	4.60617	7.71282	7.90536	8.62338		FAM3B	0.02325	0	0.053998	0	0.260136	0.12537	0.194043	0		FAM83F	0.127999	0.133896	0.496576	0.037367	0.555748	0.263833	0	0.029678		ERBB2	1.82339	1.24672	1.2223	0.254161	0.38904	0.58279	0.45799	2.01726
FGF22	0.152822	0.499249	0.058881	0.157334	1.0056	0.632535	1.07276	0.74778		EGR2	0.075732	0.699478	6.56581	0.738136	0.977425	2.99217	4.27492	1.54851		FAM83F	0	0.18537	0.501199	0	0.159183	0.235019	0	0.029785		FAM8A1	5.91319	8.08958	7.77492	0.056814	0.264794	4.43956	8.51047	6.38366		ERBB3	0.423594	0.185228	1.0126	0.386569	0.816427	0.910535	2.59997	8.61419
FGFBP1	0	0	0	0	0	0	0	0		FAM126B	3.59088	1.16232	7.47488	0.065958	0.433245	2.82487	9.40789	2.28233		FAM8A1	3.27489	14.2037	2.86929	0.270396	1.72082	3.0952	6.78636	6.37072		FBP1	0	0.196036	0	0.119092	3.32448	0.450577	0.574698	0.348176		ERBB4	1.73532	0.180966	1.86225	0.220836	0.153629	0.508905	2.39493	3.14481
FGFR1	3.86591	4.19359	4.90157	0.369321	0.443411	2.12966	6.02681	9.56847		FAM3B	0	0.254043	0	0	0.129775	0.046731	0.074351	0		FBP1	0.056511	0	0.336061	0.016324	1.89817	0.382757	0.508486	0.310297		FCRL3	0.074317	0	0.128585	0	0	0	0	0.001604		ESR1	0.046194	0	0	0	0	0.12489	0.050729	0.02058
FGFR2	1.69539	1.47659	3.2179	1.05003	3.40792	4.36798	7.3789	17.7316		FAM83F	0.273107	0.190983	1.15071	0.061768	0.322775	0.659419	0.097226	0.028489		FCRL3	0.025207	0.061354	0.054012	0	0.021401	0.051664	0	0		FGA	0	0	0	0	0	0	0	0		ESR2	0.111546	0.030398	0.032019	0	0.048437	0.048589	0.211135	0.024283
FGFR4	1.55396	0.217194	0.184492	0.028313	0.055251	0.041563	0.062525	0.133358		FAM8A1	6.29849	10.5923	8.51623	0.303959	0.489785	3.81635	8.76419	5.61247		FGA	0	0	0	0	0	0	0	0		FGF18	0.26306	0.367583	1.20202	0	0.338601	0.542084	0.10743	0.210142		FAAH	17.0712	10.3966	5.50858	1.698	6.03479	6.04079	6.59884	8.81356
FKBP5	1.29486	1.24095	0.853662	0.066286	0.05459	0.356061	0.404387	0.723336		FBP1	0.056743	0	0.201799	0.182098	1.16754	0.363843	0.591996	0.375681		FGF18	0.274018	0.297105	0.163102	0	0.166158	0.472283	0.097022	0.365779		FGF2	0.55458	0.496262	1.52915	0.432134	1.17945	0.93479	0.950205	3.40931		EGR2	0	0.791956	3.44379	0.194702	0.579198	1.66579	5.61137	1.82011
FLNB	2.00646	1.66094	1.13076	0.119015	0.111678	0.765749	2.33456	2.73697		FCRL3	0	0	0.044398	0	0	0	0.047631	0		FGF2	0.788699	0.721629	0.561585	0.688564	0.441184	0.887847	2.05455	3.52488		FGF20	0	0	0	0.025093	0	0.029337	0.27757	0.421372		FAM126B	1.21474	0.362788	5.46368	0.27089	0.329642	2.0033	7.26247	2.63299
FMO3	0	0.028698	0.241686	0.246196	0.338213	0.347806	0.08846	0		FGA	0	0	0	0	0	0	0	0		FGF20	0	0	0.079723	0	0.033764	0	0	0.269545		FGF22	0.472482	0.59977	1.42989	0.07788	1.40615	0.324783	1.22553	0.792884		FAM3B	0.068341	0	0.159134	0.002871	0.636463	0.176422	0.10599	0
FOXP2	1.45965	1.47009	2.14889	0.02254	0.007239	1.49093	1.78627	0.106648		FGF18	0.591557	1.4014	0.326908	0.292986	0.097993	0.519486	0.623323	0.136986		FGF22	0.027064	0.718353	0.839226	0.550978	1.51849	1.5611	0.506072	0.73993		FGFBP1	0	0	0	0	0	0	0	0		FAM83F	0.398166	0.460719	0.343404	0	0.219811	0.558687	0.069436	0.113443
FXN	1.36392	2.52608	2.53532	0.964254	2.98336	3.86143	2.52912	1.80365		FGF2	1.85568	0.514196	1.33594	0.107221	0.378629	1.21538	1.16044	2.4747		FGFBP1	0	0	0	0	0	0	0	0		FGFR1	5.5141	2.76301	3.97554	0.585998	2.0298	1.97896	4.14602	6.48591		FAM8A1	5.80733	4.95438	4.77661	0.239465	0.210355	3.45503	8.37979	5.44941
FXYD2	0.204931	0	0	0.059598	0	0.123639	0	0.285902		FGF20	0	0	0.205757	0.146165	0.041709	0.115306	0.111276	0.134832		FGFR1	3.73254	5.38981	2.4896	1.05934	2.06081	2.55641	4.54604	5.96154		FGFR4	0.813506	0.294631	0.056334	0.061936	0.062195	0.025841	0.111519	0.103553		FBP1	0.065508	0.239075	0.12487	0.097696	1.305	0.404795	0.143431	0.159875
FXYD5	1.16553	3.34356	2.51989	1.28632	3.39236	2.747	3.14869	4.03178		FGF22	0.060821	0.978189	1.20575	0.245016	0.648103	1.42576	0.723998	0.563131		FGFR4	0.58188	0.274533	0.054954	0	0.067067	0.05692	0.072509	0.131531		FKBP5	2.17074	0.601617	0.156844	0.116957	0	0.50592	0.433199	1.53603		FCRL3	0	0.015077	0.028448	0	0	0	0.022671	0.018647
FZD3	6.82362	9.65686	9.14631	1.55333	1.06185	8.93734	10.1577	5.10321		FGFBP1	0	0	0	0	0	0	0	0		FKBP5	1.83687	1.03702	0.809204	0.07175	0.238798	0.427864	0.585756	1.83627		FLNB	2.08248	0.756715	0.790836	0.084188	0.273561	1.76375	2.11914	3.67037		FGA	0	0	0	0	0	0	0	0
FZD4	7.60587	4.85695	2.33063	0.409898	0.272935	2.01875	1.68114	2.75696		FGFR1	2.5502	3.42955	3.76078	1.69866	1.11415	2.16225	4.4294	6.16359		FLNB	1.62942	2.04766	0.759784	0.267586	0.636144	1.4205	2.17081	3.11623		FMO3	0	0	0	0.486582	0.264295	0.392952	0.308165	0.218574		FGF18	1.00634	0.929213	0.201472	0	0	0.13459	0.163527	0.230349
GABRA6	0.060911	0.10233	0	0	0.030313	0.039465	0.259303	0.108258		FGFR4	0.922394	0.174283	0.242652	0.082951	0.036246	0.038083	0.112079	0.07583		FMO3	0	0.171957	0.159786	0.614011	0.38239	0.127684	0.280616	0.083462		FOXP2	2.08376	0.764838	1.3271	0	0.167688	1.56553	1.69601	0.434707		FGF2	0.521241	0.374181	0.844351	0.446204	0.394084	1.52267	1.23811	2.89927
GABRE	0	0.053543	0.211592	0	0.024117	0.044943	0.223112	0.23395		FKBP5	2.63058	1.42744	2.01841	0.056863	0.034637	0.335297	0.532798	1.4909		FOXP2	1.24827	0.783268	0.928861	0.015689	0.334864	1.02928	1.4728	0.577536		FXN	1.81091	4.25009	2.73208	1.06759	2.90733	3.92761	3.45835	3.20054		FGF20	0	0.082877	0.159505	0	0.201232	0	0.041357	0.134223
GABRP	0	0	0	0	0	0	0	0		FLNB	2.63409	1.38723	1.29791	0.34838	0.143	0.978551	1.98057	2.53482		FXN	3.28014	2.87852	2.96052	0.985895	2.81606	3.66529	2.40367	2.73455		FXYD2	0.041988	0.095941	0	0.176052	0.403668	0.083295	0	0		FGF22	0.960601	1.28611	0.228858	0.020052	0.390978	0.714186	0.968218	0.247879
GAD2	1.50144	2.79393	14.4174	3.36421	2.71044	3.35989	9.61095	7.66905		FMO3	0.036119	0.059325	0.064226	0.494972	0.190187	0.165641	0.220013	0.169055		FXYD2	0.028599	0.018319	0	0.146254	0.059593	0	0	0.004678		FXYD5	1.16024	2.21855	1.40749	2.10779	4.25428	2.58567	1.58433	3.29335		FGFBP1	0	0	0	0	0	0	0	0
GAL3ST1	0.464104	1.2468	3.20079	3.22487	6.14339	2.85132	6.90931	6.1467		FOXP2	2.13919	1.19581	2.01087	0.071541	0.1479	1.69057	1.40771	0.460115		FXYD5	0.986969	2.06421	2.30938	3.36496	5.83382	2.55693	3.27883	2.2978		FZD3	11.9675	6.32177	5.91704	1.1991	1.345	6.09165	11.5273	5.04903		FGFR1	2.56105	1.89254	3.37992	0.624601	0.60779	1.26086	4.52941	6.32757
GALC	3.64908	4.44009	3.81006	0.490515	0.458232	2.76059	6.98008	4.5137		FXN	2.04471	2.78686	2.32093	1.63102	1.89532	3.20109	2.57948	3.55552		FZD3	7.90211	8.6864	4.43049	1.55753	2.0882	6.39259	9.60612	6.56241		FZD4	7.70558	2.93799	2.40867	0.409426	0.939405	1.4752	2.48388	2.22931		FGFR4	1.82594	0.278845	0.148424	0.088606	0.037388	0.037252	0.064703	0.125756
GC	0	0	0	0	0	0	0	0		FXYD2	0.222176	0.09311	0	0.177036	0	0	0.221554	0		FZD4	4.73479	4.32591	1.20226	1.57249	0.684378	1.23339	2.76471	2.75015		GABRA6	0.167505	0.109484	0.263799	0.041109	0	0.020032	0.090946	0.03265		FKBP5	1.63583	0.79573	1.38329	0.069462	0.058091	0.463827	0.454949	1.2275
GCLM	2.19339	2.87752	4.71421	1.26614	1.14297	3.54101	5.11257	4.88951		FXYD5	0.667287	3.06725	1.65451	3.14322	2.16978	2.17024	2.32704	1.8401		GABRA6	0.084354	0.067515	0.184813	0	0	0.25109	0.134408	0.162511		GABRE	0.127011	0.028513	0.252564	0.040113	0	0.147857	0.21221	0.130234		FLNB	2.64729	0.680098	1.11567	0.162047	0.162636	0.850524	1.12036	3.37846
GDNF	0	0.135844	0.225714	0	0	0	0	0		FZD3	10.5263	5.49058	12.5508	1.80473	2.1717	6.3713	11.5509	5.07853		GABRE	0.157015	0.026858	0.17972	0	0.095096	0.27602	0.555617	0.076459		GABRP	0	0	0	0	0	0	0	0		FMO3	0	0	0.366652	0.350431	0.262525	0.481615	0.159994	0.126938
GFRA1	0.615812	0.80965	1.97766	0.038452	0.178301	0.413268	0.892075	0.952998		FZD4	8.42413	3.35581	2.67467	0.792054	0.595645	1.17426	2.59104	2.08775		GABRP	0	0	0	0	0	0	0	0		GAD2	2.65766	2.83912	9.28278	2.85277	2.99974	3.22032	7.75329	7.40816		FOXP2	2.16977	0.415331	2.02275	0.039724	0.033676	0.622103	2.12672	0.537514
GFRA3	0.069923	0.231246	0	0	0.064894	0.032424	0	0		GABRA6	0.25639	0.035256	0.391794	0	0.044842	0.035152	0.185262	0.121558		GAD2	1.70507	2.97883	10.3667	2.23033	4.74428	3.13282	10.2399	7.82497		GAL3ST1	0.310952	1.7816	5.07663	2.9951	10.8145	7.6714	5.99666	11.8034		FXN	0.762904	2.80632	2.50335	0.937697	2.52956	4.22649	3.24856	2.54153
GFRA4	0	0	0	0	0.046603	0	0	0		GABRE	0.067376	0.041881	0.059104	0	0.035194	0.177952	0.243071	0.059171		GAL3ST1	0.226445	1.7732	2.31215	4.97848	10.1887	3.70079	4.68633	8.06794		GALC	4.15348	3.52589	3.29766	0.147263	0.389556	5.99652	6.15797	7.44995		FXYD2	0.127374	0.116292	0	0	0	0	0	0.001114
GH1	0	0	0	0	0	0	0	0		GABRP	0	0	0	0	0.045534	0	0	0		GALC	3.51214	5.56585	3.68061	0.763655	1.53629	3.85551	7.39217	6.49161		GC	0	0.034182	0	0.038687	0	0	0	0		FXYD5	2.52208	2.68296	1.70059	2.62005	2.40114	2.43885	2.97953	2.94238
GJA5	0.078574	0.707417	1.87522	0.21658	0.156414	0.663225	0.667288	1.11722		GAD2	1.45483	1.85395	14.069	2.79476	1.91392	3.81207	10.2878	6.70717		GC	0	0	0	0	0	0	0	0		GCLM	2.37622	2.43984	4.18953	1.06706	2.2148	4.06388	4.5206	3.78037		FZD3	3.3154	3.60653	7.45778	1.53224	1.39703	4.07841	11.3047	5.04436
GJA8	0	0	0	0	0	0	0	0		GAL3ST1	0.170838	2.05353	3.37764	4.89672	2.9528	4.26861	4.45532	9.37201		GCLM	2.19616	2.26107	3.35891	1.358	1.93467	4.22838	5.65133	4.26517		GDNF	0.251009	0	0	0	0	0	0.181099	0		FZD4	3.7005	1.33474	1.50177	0.494718	0.353157	1.27797	2.38167	2.40516
GJA9	0.432562	0	0	0.019644	0.068115	0.022154	0.109979	0.366044		GALC	4.2851	3.88076	6.05983	0.623647	1.4693	2.98389	6.78982	6.65191		GDNF	0.167972	0	0.074816	0	0.072284	0	0.089618	0.195748		GFRA1	0.489282	0.355658	0.670365	0.119538	0.232413	0.327015	0.351812	0.94892		GABRA6	0	0.199532	0.099209	0	0.030907	0.173114	0.393379	0.124382
GMPR	0.372829	1.65435	1.50738	0.377023	1.25691	0.556677	0.858249	1.42633		GC	0	0	0	0	0	0	0	0.02788		GFRA1	0.4484	1.23415	0.776634	0.155293	0.529687	0.240652	1.95119	0.81961		GFRA3	0	0.041704	0	0	0	0.035718	0	0.037481		GABRE	0.037854	0	0.140785	0	0.024257	0.132276	0.19944	0.083061
GNAL	17.6157	17.0877	19.0823	0.246012	0.595495	4.58887	7.67698	5.74454		GCLM	3.37811	2.99231	4.68525	1.32442	1.90093	3.19841	5.16372	4.19287		GFRA3	0.094236	0.373911	0.014949	0	0.162766	0	0.050278	0.147429		GFRA4	0	0.083023	0.207136	0	0	0	0	0		GABRP	0	0	0	0	0	0	0.039048	0
GNB1L	2.90529	6.02155	4.484	0.755743	4.31814	3.83076	3.50787	3.44109		GDNF	0	0.210615	0	0	0	0	0	0.243741		GFRA4	0.043221	0.027352	0	0	0	0.043504	0.059955	0		GH1	0	0	0	0	0	0	0	0		GAD2	1.25295	3.63119	13.5025	4.93479	3.76467	2.31027	8.60682	6.08138
GNB3	4.81981	0.420383	0.25659	0.160008	0.206466	0.630118	0.771171	1.19673		GFRA1	0.552771	0.270448	1.93512	0.185975	0.129803	0.324726	1.13335	0.383525		GH1	0	0	0	0	0.358648	0	0	0		GJA5	0.106941	0.281182	0.880913	0.052313	0.197176	0.48164	0.694408	0.883349		GAL3ST1	1.1422	2.60405	1.91267	2.15628	4.78208	2.2999	4.26533	11.1135
GNPAT	9.32088	18.3907	9.28903	3.01558	2.86377	8.96642	9.74231	5.50007		GFRA3	0.095271	0.267073	0.247773	0	0.050781	0	0.11638	0.105522		GJA5	0.161018	0.613191	0.492984	0.331227	0.230971	0.503542	0.448115	0.814256		GJA8	0	0	0	0	0	0	0	0.034829		GALC	3.74267	3.1266	5.14112	0.323506	0.733113	3.41112	6.67413	7.01151
GNRH1	0.552313	0	0	0.461045	0.150667	0.017074	0	0.603529		GFRA4	0	0	0	0	0	0.048648	0.047713	0.046893		GJA8	0	0	0	0	0	0	0	0		GJA9	0.181451	0.056989	0.107125	0.068775	0.186315	0.131256	0.140741	0.21941		GC	0	0	0	0	0	0	0.036685	0
GP6	0.941021	0.164058	0.083012	0	0.166342	0.125241	0.413552	0.460483		GH1	0	0	0	0	0	0	0	0		GJA9	0.179491	0.079434	0.072286	0.063419	0.220146	0.073578	0.174116	0.139106		GMPR	0.382433	0.750565	2.302	0.690078	2.45284	0.818751	0.584583	1.29814		GCLM	0.85586	1.86356	4.41858	0.547956	2.20754	3.83594	5.75056	4.90588
GPC6	0.51068	1.39313	1.64297	0.052706	0.060391	0.530765	0.979167	0.699833		GJA5	0.215572	0.771813	0.648802	0.68479	0.114128	0.611171	0.848725	1.11517		GMPR	0.4496	0.272071	1.40844	0.666161	2.18353	0.9994	1.31254	1.78537		GNAL	19.4334	7.76998	15.2061	0.187509	0.832018	3.31419	7.79623	4.4687		GDNF	0	0.06759	0	0	0	0	0.058982	0.160361
GPR158	0.650337	0.683353	8.38251	0.341282	0.525949	7.86725	17.9447	2.83445		GJA8	0	0	0	0	0	0	0	0		GNB1L	1.31546	6.12309	2.54979	1.09905	5.56632	2.55307	1.80293	3.08365		GNB1L	1.95834	7.01816	5.61319	0.780602	9.79193	2.82793	3.77189	2.59946		GFRA1	0.377615	0.163908	0.8479	0.141989	0.3542	0.338326	1.31856	1.11828
GPR78	0	0	0.142002	0	0.139933	0.245261	0.178061	0.274956		GJA9	0.321045	0.02728	0.116537	0.05258	0.138787	0.176116	0.131988	0.33952		GNB3	1.69353	0.710073	0.641246	0.225291	0.425203	0.240302	0.626623	0.486257		GNB3	3.65286	0.522667	0.539739	0.115951	0	0.143358	0.798976	0.667749		GFRA3	0.054619	0.076878	0.041989	0	0	0	0.081799	0.034856
GRIA3	13.3984	9.71509	18.3436	0.450358	0.824139	8.84534	19.3555	8.71773		GMPR	0.359207	0.633038	0.906758	0.79537	1.24822	0.7462	0.934387	1.63001		GNPAT	13.5133	18.1162	7.91359	3.67596	4.73792	9.38271	10.6354	6.82277		GNPAT	12.0086	18.3489	5.93793	3.28157	5.97536	9.70312	10.095	7.15478		GFRA4	0	0	0	0	0.085513	0	0.174175	0.046681
GRIA4	3.44159	3.4795	13.9335	0.461466	0.989376	12.6559	17.9907	6.46986		GNB1L	1.45633	5.98524	2.30249	2.26222	1.96734	3.99669	3.55032	2.981		GNRH1	0.204009	0.274358	0.024895	0	0.565233	0.310196	0	0.3843		GNRH1	0.406482	0	0	0.15526	0	0.374082	0	0		GH1	0	0.096941	0	0	0.044134	0	0	0
GRID1	7.02948	9.4895	11.5276	0.650978	1.80105	7.91427	14.3521	12.8331		GNB3	2.96652	0.569425	0.469459	0.34061	0.428583	0.217894	0.450768	0.353053		GP6	0.566414	0.199807	0.268458	0.074624	0.13292	0.232514	0.220469	0.180626		GP6	0.360109	0.188784	0.30417	0.030105	0.113471	0.148576	0.398719	0.101212		GJA5	0.321175	1.02792	0.492243	0.371154	0.393306	1.15974	0.191113	0.76888
GRIK1	0.726032	0.606835	9.90926	2.33007	1.61768	1.53791	2.59723	3.72582		GNPAT	12.4279	18.5633	7.67709	4.64242	6.18179	8.5336	10.7755	6.18838		GPC6	0.705448	0.951018	0.880329	0.222328	0.347423	0.440513	0.50583	0.69297		GPC6	1.10408	0.505881	0.942418	0	0	0.190158	1.18509	0.452963		GJA8	0	0	0	0	0	0	0	0
GRIK2	18.8765	6.17756	4.38084	0.277607	0.390808	1.42588	3.32108	2.54277		GNRH1	0.204846	0	0	0.652878	0.216899	0	0	0		GPR158	0.624021	0.545056	3.75897	0.476191	3.04879	5.10932	10.8869	7.45686		GPR158	0.705382	0.223082	6.67504	0.161304	0.783475	6.45918	16.2564	5.77547		GJA9	0.03783	0	0.114757	0	0.139284	0.13588	0.15802	0.418567
GRIK3	10.0814	4.21463	11.7107	0.173088	0.170377	1.4432	6.68345	2.29382		GP6	0.522217	0.101184	0.110298	0	0.064791	0.169584	0.238581	0.168427		GPR78	0	0	0.141204	0.102678	0.1819	0.206256	0.416759	0.107617		GPR78	0	0	0.520319	0	0.194107	0.267506	0.561967	0.196108		GMPR	0.322055	1.28624	1.42538	0.920576	1.22316	1.47936	1.34483	1.45027
GRIK4	1.43284	1.87578	3.76926	0.247283	0.762852	2.68115	3.73889	3.34491		GPC6	1.08506	0.626865	1.40987	0.134944	0.024786	0.173409	0.802802	0.435682		GRIA3	13.5018	9.85345	10.7104	0.461188	3.57747	8.1371	17.7881	13.4619		GRIA3	18.5972	5.9535	7.60748	0.359849	0.529709	8.61457	19.4086	11.0265		GNAL	11.118	2.58821	17.6399	0.42761	0.611634	2.37038	8.35201	4.17498
GRIN2B	3.12594	1.37091	9.75358	0.49764	0.478343	3.26804	5.00975	1.97965		GPR158	0.839868	0.594006	11.1584	0.362162	0.99109	6.90269	17.6939	5.32105		GRIA4	4.12168	3.3254	8.79308	0.52627	3.04605	9.55951	15.2651	10.7826		GRIA4	4.32455	1.90013	8.13302	0.308885	2.70178	10.164	19.0696	10.3035		GNB1L	4.85832	7.20925	3.01415	1.12419	2.52167	2.51994	2.73127	2.6594
GRIN2C	0.627944	0.722459	2.446	2.07815	2.11996	2.57652	2.48018	15.9174		GPR78	0.053054	0	0.117287	0	0	0.365508	0.388855	0.09816		GRID1	5.99525	10.7116	8.46405	1.47685	3.80674	8.15644	10.1966	14.0613		GRID1	7.42182	9.3004	10.2688	0.868596	4.31117	8.18573	11.6557	14.1901		GNB3	5.22887	1.02387	0.764711	0.26199	0.31705	0	0.309502	0.729261
GRIN2D	3.79545	4.87958	4.01895	0.058876	0.310453	1.25254	1.51577	1.75218		GRID1	7.56663	11.3062	11.5457	2.15123	2.45667	7.72173	12.2892	13.3128		GRIK1	1.59649	1.38765	9.47512	2.55	2.30529	2.38824	3.79288	1.42698		GRIK1	1.35396	0.897977	8.00449	2.67391	2.07734	1.65947	3.75734	2.07825		GNPAT	6.98711	14.4058	9.00577	2.38971	4.81151	9.55673	11.0533	6.66315
GRIN3A	2.20768	2.16904	13.2395	0.170665	0.165641	2.82514	5.26695	1.69303		GRIK1	1.36621	0.702134	12.0222	2.74561	3.47849	2.00422	3.35015	1.95274		GRIK2	14.9637	7.0002	3.47812	0.562143	0.83181	2.01504	3.86911	2.85496		GRIK2	16.0631	4.31018	2.60748	0.118188	0.467173	1.69003	3.44399	2.74095		GNRH1	0.236486	0	0.528208	0	0.286702	0.440732	0	0.181928
GRIP1	9.1751	9.54464	3.09805	0	0.010998	0.519828	0.997394	0.826608		GRIK3	11.626	3.14828	11.3807	0.202402	0.154991	1.67582	5.45207	2.16479		GRIK3	4.84997	5.97934	4.27466	0.441573	0.857128	1.51175	5.14781	3.56335		GRIK3	9.79159	1.4568	6.0215	0.059742	0.075058	1.50557	4.61281	2.60992		GP6	0.300955	0.247907	0.285112	0.086591	0.226034	0.13531	0.084485	0.154079
GRM2	8.45963	9.61294	5.62623	0.105725	2.40956	11.4841	13.1759	5.18186		GRIK4	1.33937	1.34868	3.91651	0.946848	0.738808	1.82122	3.0639	2.57113		GRIK4	2.85145	5.08674	2.63802	0.809815	1.12479	2.77095	3.78388	2.43878		GRIK4	0.933631	1.0022	2.68441	0.492249	1.58251	1.95298	3.09526	2.22447		GPC6	0.557513	0.308188	0.789435	0.165694	0.142997	0.29378	0.534544	0.403373
GRM4	1.10594	1.50581	2.9849	0.05981	0.434742	1.49611	1.92674	2.09629		GRIN2B	5.68221	0.502841	10.427	0.444351	0.49935	2.86064	4.2107	2.29818		GRIN2B	1.89634	1.5709	4.04684	0.51898	0.52254	3.36459	3.2387	3.88711		GRIN2B	3.42012	0.345733	2.62936	0.24617	0.047483	2.14614	3.88532	3.02268		GPR158	0.493943	0.266205	6.56964	0.458654	0.406638	3.97779	15.078	5.47197
GRM5	7.79377	14.4485	14.0341	0.298888	0.25058	5.44354	13.1821	5.1355		GRIN2C	0.164715	0.392245	1.81991	4.16643	2.09223	3.53076	1.87424	10.8698		GRIN2C	0.437445	0.817136	1.9789	2.94694	3.97619	2.43235	2.97983	10.6114		GRIN2C	0.651276	0.559309	3.02542	2.1344	5.04355	2.01423	2.13807	11.2971		GPR78	0	0	0.046449	0	0.062263	0.15431	0.277975	0.194378
GRM8	0.170256	0.393207	1.77375	0.092684	0.191647	1.52962	3.52824	1.00139		GRIN2D	2.08093	4.71688	3.7432	0.515303	0.374273	1.12939	1.17025	1.61212		GRIN2D	1.6882	5.48278	2.76982	0.139081	0.453052	0.945249	0.878974	1.33644		GRIN2D	2.4961	3.13417	4.30325	0.110024	0.512312	0.756826	1.39438	1.68565		GRIA4	5.28212	3.00047	14.8925	0.430145	1.87356	8.40895	18.7322	6.22907
GSK3B	12.6221	17.9327	15.7137	0.455263	0.910363	10.6514	13.3885	6.72839		GRIN3A	4.53614	2.17081	14.8864	0.055058	0.215275	2.22592	4.19475	1.50675		GRIN3A	2.19127	2.52592	5.90883	0.10029	0.390154	2.79462	4.65212	1.88267		GRIN3A	3.16127	0.79121	9.09376	0.110119	0.139205	2.17476	4.27438	1.27315		GRID1	15.8065	9.75328	6.92538	0.846062	2.04922	3.30979	9.76601	12.8644
GSS	13.8566	14.4821	12.7073	2.09901	8.57472	14.0582	14.5562	9.39243		GRIP1	9.37535	7.55793	3.25881	0.081808	0.071006	0.536746	1.11264	0.912374		GRIP1	6.47323	8.29705	1.55377	0.052892	0.277756	0.463275	1.20979	0.853646		GRIP1	11.3136	6.99522	1.47829	0.016274	0.062178	0.554845	1.05542	0.763698		GRIK1	1.54439	1.38928	10.249	2.34554	2.85961	2.09174	3.2875	1.69229
GSTM1	0.347673	7.63531	0	0.130599	0.576747	10.3909	4.99939	0.928306		GRM2	5.88759	11.2475	7.19213	0.859035	1.49589	8.76221	10.006	5.83574		GRM2	5.28964	12.1327	4.34075	0.174463	2.13816	8.32428	6.38765	6.8105		GRM2	6.12501	7.69613	5.94605	0.127738	4.36922	7.02551	12.2962	6.91752		GRIK2	6.56238	1.80144	4.72831	0.500092	0.310622	1.04008	4.26158	2.20113
GSTT1	6.27482	0	11.9684	10.8701	16.1147	0	9.10637	0		GRM4	0.902445	2.66174	3.69444	0.13024	0.553427	1.14858	1.67298	1.05998		GRM4	1.08248	1.55281	2.37852	0.106154	1.03748	1.28703	1.76723	1.54324		GRM4	0.896592	1.21657	3.8564	0.069478	0.923299	0.900154	2.09962	1.13682		GRIK3	12.6828	0.821698	5.05053	0.070643	0.075264	0.716839	4.60844	3.10313
GSTT2	0.659778	1.99867	0.415116	0.12741	4.83888	2.43535	0	2.816		GRM5	10.9833	7.62551	16.5905	0.389094	0.484473	3.5942	11.1114	4.40776		GRM5	6.34787	15.8856	4.71632	0.860451	1.43177	3.42224	9.4408	6.51171		GRM5	10.7527	5.6976	8.1845	0.382568	0.321285	3.82724	12.4104	5.0912		GRIK4	1.96952	0.984386	2.69405	0.343171	0.57947	1.39037	2.55915	2.37171
GTF2H4	12.6106	8.95898	3.51139	1.79012	3.00005	4.52845	5.22418	5.18031		GRM8	0.418077	0.246442	2.34039	0.230943	0.506034	2.12532	2.67237	1.32055		GRM8	0.738226	0.419823	2.43755	0.113257	0.57933	1.70186	2.59151	1.53276		GRM8	0.393877	0.202862	2.28279	0.094419	0.527548	1.51852	3.53748	1.23504		GRIN2B	5.21505	0.274529	3.7813	0.583081	0.125944	1.20092	2.19127	1.74705
HAL	0	0	0	0	0	0	0	0		GSK3B	17.4592	10.7693	17.1666	1.21407	0.945948	9.16973	17.7049	7.61942		GSK3B	13.5214	17.5809	7.07657	0.614859	3.78018	7.71136	13.8761	9.58267		GSK3B	17.5766	8.11132	8.7793	0.518233	0.318993	7.85428	16.0857	7.73617		GRIN2C	0.184992	0.072203	1.56477	1.04124	2.66519	2.90406	1.71555	11.0124
HAT1	6.76496	4.71937	6.18069	4.88455	3.91771	5.29299	6.4198	6.06539		GSS	11.5973	17.17	14.3622	4.5904	8.38912	12.7959	14.3343	10.5058		GSS	14.1059	17.9831	12.2436	2.91415	10.3683	13.4622	10.7724	10.5628		GSS	12.0974	15.1701	12.0742	2.16276	13.3252	12.3566	14.2639	10.5974		GRIN2D	6.61078	3.82007	1.88633	0.076115	0.315099	0.622949	0.81593	1.42534
HDAC10	11.9449	7.65152	5.0211	1.50715	3.40049	3.11208	4.50205	5.77693		GSTM1	0	9.53628	0.058087	0.255089	0.841651	10.3701	5.02262	0.621317		GSTM1	0	8.84687	0.338108	0.075865	1.08546	11.8297	5.48491	0.676532		GSTM1	0.12424	8.23955	0	0.033823	0.290821	10.6006	5.08359	0.559095		GRIN3A	2.95834	0.903824	8.61892	0.05948	0.100337	1.22427	4.37872	1.46279
HDAC3	14.468	14.6013	9.52728	1.2576	4.62622	7.44768	6.00363	6.31265		GSTT1	4.25866	0	11.4221	11.7858	10.5637	0	10.8695	0		GSTT2	0.07194	0.722738	0.278959	0.30016	3.78874	2.44922	0.299156	2.95155		GSTT2	0.200253	2.15784	0.764003	0.225822	5.95808	2.36787	0.641031	3.12403		GRIP1	7.5724	4.69268	2.44278	0.0775	0.038716	0.303426	1.12503	0.642612
HDAC4	2.48296	3.29616	2.97483	0.134029	0.080919	1.91216	2.87138	1.71831		GSTT2	0.521583	2.1304	0.464677	0.373289	2.05274	2.73964	0.329605	4.64866		GTF2H4	7.70718	9.49619	4.94737	1.76035	4.44021	4.18463	3.95312	4.13264		GTF2H4	9.19394	10.1717	4.80422	1.09719	5.64921	4.22318	4.96795	3.85002		GRM2	16.0869	11.8471	3.27571	0.284959	1.20258	4.67036	8.06559	4.95774
HIRA	9.7843	12.6023	16.7673	0.504323	1.5219	7.30196	11.7593	8.17428		GTF2H4	9.46718	10.4545	4.93147	2.3659	2.76323	3.48015	4.09248	3.96414		HAL	0	0	0	0	0	0	0.023819	0.008215		HAL	0	0	0	0	0	0	0	0		GRM4	0.879979	0.846319	2.30441	0.031338	0.466168	0.676946	1.65941	1.57545
HIST1H2AH	0	0	0	0	0	0	0	0		HAL	0	0	0	0	0	0	0	0		HAT1	7.33034	3.83208	6.33385	6.80401	5.90621	4.83366	7.64804	5.45472		HAT1	7.64886	4.54701	4.02885	5.03323	5.64745	6.61376	4.83037	6.21072		GRM5	8.99697	2.07272	8.70562	0.548031	0.334334	1.89898	9.06287	4.26603
HIST1H2BJ	0.027106	0.24624	1.22743	0	0.292272	0.206692	0	0		HAT1	6.1978	5.55646	7.9554	6.47532	6.35194	5.01601	7.38172	6.96665		HDAC10	5.0752	11.1251	4.73898	1.19003	5.4877	3.24569	3.18308	3.65877		HDAC10	5.89418	8.29576	9.58863	0.850689	6.43533	1.93099	4.56774	3.7792		GRM8	0.786668	0.530307	3.08888	0.133886	0.266248	1.00266	3.199	1.36042
HMBS	1.78969	2.97871	1.99615	2.76141	6.53808	2.87279	4.00967	4.36815		HDAC10	6.5367	9.95495	5.37695	2.22613	2.35195	4.0906	3.59477	3.75832		HDAC3	13.0251	14.3947	8.29101	2.06341	4.88188	6.03796	8.07142	4.98319		HDAC3	13.2374	15.5722	8.49196	1.3175	7.4796	5.76648	8.53454	5.4855		GSK3B	10.2944	4.91322	10.6868	1.51862	0.779241	6.09923	16.0945	6.2761
HMX3	0	0	0	0	0	0	0	0		HDAC3	13.131	12.371	6.24481	2.91476	4.89022	6.32341	7.87333	5.56351		HDAC4	0.913923	3.87404	1.10184	0.095159	0.563786	1.35836	2.19577	2.3269		HDAC4	2.17221	1.10485	2.4542	0.079836	0.060509	1.50136	2.56584	1.9243		GSTM1	0.367064	8.57372	0.207825	0.065616	0.719162	15.0989	5.71083	1.01641
HNMT	2.91603	5.39823	7.54044	2.93388	2.54905	4.16308	6.28049	5.378		HDAC4	1.83378	2.37338	3.73966	0.154922	0.121872	1.96548	2.95157	1.52238		HIRA	11.2898	13.952	12.0617	1.22555	2.65306	8.39415	8.4668	7.40088		HIRA	12.0584	11.3893	10.8234	0.543534	2.1306	7.42652	10.2057	8.8538		GSTT1	10.368	0	10.341	7.95062	15.5294	0	12.0392	0
HOMER2	5.02407	3.52733	11.6298	0.762661	4.23151	6.6155	6.54079	3.82826		HIRA	10.7062	14.102	16.5102	1.90558	3.09516	7.16031	9.75152	8.03962		HIST1H2AH	0	0	0	0	0.083665	0	0	0		HIST1H2AH	0	0	0	0	0	0	0	0		GSTT2	1.08043	5.53166	0.678932	0.267027	3.76227	2.36903	0.140827	3.20015
HOMER3	11.8634	15.5408	5.11248	8.81491	9.95076	6.46137	6.27051	8.36633		HIST1H2AH	0	0	0	0	0.150722	0	0.183822	0		HIST1H2BJ	0	0	0.406846	0.295842	0.177062	0.314868	0.162447	0.473101		HIST1H2BJ	0.748077	0.24609	0.999453	0.148382	0	0.646142	0	0.23893		GTF2H4	14.4519	12.6562	3.5762	1.57821	2.38343	4.19329	3.2691	3.19881
HORMAD2	0.059536	0	0	0.074033	0	0.035223	0	0.135005		HIST1H2BJ	0.2892	0.127258	0.271816	0.245279	0.161857	0.975409	0.252341	0.226261		HMBS	1.94393	2.92604	3.07144	2.75552	7.72305	3.13804	3.15581	3.19778		HMBS	1.53442	3.25563	2.19078	2.0866	7.58788	3.38944	2.98247	3.86244		HAL	0	0	0	0	0	0	0.026065	0
HP	0	0.842184	0.13656	0.057812	0	0	0	0.206672		HMBS	1.46233	2.78115	1.79443	3.68967	4.43653	3.19512	3.3242	3.32119		HMX3	0	0	0	0	0	0	0	0		HMX3	0	0	0	0	0	0	0	0		HAT1	3.5526	5.89984	7.022	4.09804	6.84456	7.88101	6.44621	5.53049
HRH1	0.404425	1.12701	2.54554	0.130215	0.11501	2.12335	5.00538	4.03803		HMX3	0	0	0	0	0	0	0	0		HNMT	4.40401	6.8126	6.00746	4.69536	3.9712	3.26195	9.07623	4.30234		HNMT	5.49244	5.15745	7.98276	3.58703	4.94438	5.66488	7.71212	4.92107		HDAC10	15.5043	11.1537	4.18705	0.691592	2.49204	2.38159	3.30965	3.52678
HRH2	1.87278	1.60232	8.07481	0.159443	0.994812	7.22312	8.8555	2.97173		HNMT	4.82141	6.65224	8.76452	4.72267	3.11643	4.6495	7.48531	3.7933		HOMER2	4.67095	4.09868	7.11563	1.12896	3.38352	5.65852	6.58681	5.17753		HOMER2	4.90359	3.11345	5.32911	0.368981	5.24201	5.56009	6.31069	5.40444		HDAC3	15.8438	12.6127	7.88021	2.19053	3.91636	5.21247	7.96315	5.45801
HS3ST2	10.6797	16.6922	18.8727	0.353358	6.57977	17.5091	18.1431	7.45278		HOMER2	5.92114	4.27026	13.5146	1.48143	3.67037	5.76186	8.97258	4.66667		HOMER3	6.91737	15.4157	5.24933	6.52366	16.6282	5.37406	6.3989	9.80635		HOMER3	11.4009	16.6547	8.48878	6.3936	18.8773	6.73136	5.90908	10.1656		HDAC4	2.35182	0.549215	1.56206	0.035016	0.02414	1.23704	1.76738	1.80184
HSD17B7	2.51509	1.63698	0.731029	0.662721	0.919581	0.671687	0.551996	0.993152		HOMER3	5.02555	14.5223	5.85969	10.7558	7.41435	7.54383	6.03947	10.6558		HORMAD2	0	0.041529	0.137415	0	0.044657	0.035288	0	0		HORMAD2	0.06217	0.224685	0	0.077909	0	0.038801	0.110372	0.040717		HIRA	18.126	11.9948	12.2526	0.528045	2.257	6.66904	8.02869	7.93523
HSPA1A	6.29338	10.8378	7.92015	5.6293	4.02747	5.56837	12.4388	8.20771		HORMAD2	0.0521	0	0.092642	0.083598	0	0.039461	0.063644	0		HP	0.070086	0.104724	0.219557	0.233805	0	0.024965	0.046118	0.350752		HP	0.04073	0.184604	0.260734	0.072865	0	0.015723	0	0.423945		HIST1H2AH	0.173723	0	0	0	0	0	0	0
HSPA1B	10.225	12.0386	2.24905	4.20526	1.52938	5.11115	7.83637	7.18069		HP	0.048675	0.469663	0.352467	0	0	0.059435	0	0.513008		HRH1	0.326388	0.698381	2.17445	0.436317	0.469561	1.6597	4.61466	3.68967		HRH1	0.550433	0.516879	1.65609	0.077971	0.289965	1.72368	6.00408	3.48448		HIST1H2BJ	0.176474	0.490075	0.133833	0	0.414572	0.111152	0.264473	0.269374
HSPA1L	2.19806	2.43774	1.20893	0.234666	0.448481	1.32545	3.25719	1.57954		HRH1	0.295062	1.11942	3.79649	0.317924	0.273299	2.34933	5.02521	3.41108		HRH2	1.29494	2.09652	4.47981	0.187812	1.63888	5.58479	6.63853	4.35347		HRH2	1.83263	0.632895	7.00086	0.033734	1.06515	5.0552	9.80888	4.24968		HMBS	3.07649	4.06642	1.94886	3.54372	7.44013	2.57862	3.67951	3.80937
HTR1A	4.44957	4.33788	6.01687	0	0.234934	2.94686	6.15319	2.49628		HRH2	1.9789	1.69656	9.89889	0.231466	0.709553	6.7199	10.1028	3.86032		HS3ST2	8.49052	16.203	17.6917	0.414857	7.61107	12.2378	13.4816	9.00239		HSD17B7	1.80459	2.56073	1.09237	0.478225	1.3968	0.876817	0.739955	1.11611		HMX3	0	0	0	0	0	0	0.049027	0
HTR1B	1.37051	1.51209	0.79453	0	0.257105	1.77684	1.90731	0.897423		HSD17B7	3.32512	2.90755	0.614024	0.767827	0.95032	0.681672	1.57729	0.839927		HSD17B7	2.85793	2.29051	0.983756	0.420566	0.560709	0.983113	1.45678	0.943191		HSPA1A	7.09348	14.1398	8.43647	5.12143	3.59388	6.46525	12.8831	8.69922		HNMT	2.90048	6.42866	11.2159	3.51549	6.06847	7.31446	9.59917	5.04834
HTR1D	0.074618	0.206107	1.92333	0	0.297075	0.35723	0.343538	0.390692		HSPA1A	3.96173	17.2969	7.65533	8.66105	3.97853	4.89414	8.44382	11.3765		HSPA1A	5.78295	12.5483	7.0551	6.76008	7.2987	5.58024	6.53746	8.05877		HSPA1B	12.1958	15.9543	2.05923	3.69868	2.22422	4.16996	7.47401	6.86747		HOMER2	7.27707	4.22607	9.71715	0.792906	3.7829	5.60508	5.7714	3.87276
HTR2C	0	0	0.583938	0	0.030505	1.12505	1.54834	0.315057		HSPA1B	6.20994	16.3213	3.22276	6.34708	2.97464	4.35521	6.29596	10.1295		HSPA1B	10.2043	13.5061	3.61509	7.21054	5.24749	4.47302	5.05466	8.76087		HSPA1L	2.3291	1.97939	1.31163	0.156021	0.771181	1.89648	2.84175	2.94193		HOMER3	15.159	17.0973	5.24877	3.89882	11.109	7.65538	3.9625	9.28579
HTR3A	0.162854	0.419843	0	0	0.135078	0.213625	0.124963	0.095178		HSPA1L	1.6712	2.24256	1.87476	0.241582	1.07585	1.78957	2.4307	2.81153		HSPA1L	2.60901	2.61264	1.85014	0.116553	0.926376	1.85347	2.24042	2.08049		HTR1A	4.46689	3.64252	3.31289	0.088772	1.17108	1.77313	5.79093	3.20415		HORMAD2	0	0	0	0	0	0	0	0
HTR3B	0	0.035032	0.805472	0.071462	0.411969	2.5853	4.75612	0.333553		HTR1A	3.68713	4.1282	5.40045	0.155665	0.296388	1.18988	6.12245	2.00165		HTR1A	2.1465	5.27908	2.15882	0	0.710788	1.85319	3.89533	2.73525		HTR1B	1.65768	1.15694	0.646956	0	0.181012	0.885305	2.33743	0.786373		HP	0	0.41739	0.178677	0.122173	0	0.088697	0	0.382369
HTR3C	0	0	0	0	0	0	0	0		HTR1B	1.98835	2.51022	1.25186	0	0.209543	1.35159	2.03362	0.732306		HTR1B	0.4328	0.849243	0.307248	0.095751	1.07049	0.803792	1.21708	1.23118		HTR1D	0.218895	0.421585	1.33849	0	0.374496	1.0693	0.919358	0.454027		HRH1	0.594723	0.285849	1.91146	0.068227	0.202437	0.83367	4.73504	2.80191
HTR3D	0	0	0	0	0	0	0	0		HTR1D	0.153538	0.085213	1.84102	0.073243	0.162572	0.510834	1.04255	0.226749		HTR1D	0.057169	0.165418	1.29527	0	0.759394	0.386538	0.597536	0.234385		HTR2C	0.083427	0.073118	0.960243	0.040811	0	0.765434	1.68982	0.21668		HRH2	4.65314	2.07273	6.26256	0	1.12453	2.09022	8.28417	3.56511
HTR3E	0	0	0	0	0.026826	0.024996	0	0.095805		HTR2C	0.389748	0	0.905195	0	0.153401	0.914745	1.81211	0.614732		HTR2C	0.100717	0.135428	0.446582	0	0.107624	1.12853	2.48934	0.434759		HTR3A	0.226641	0.138696	0.695778	0.036142	0.110452	0.137148	0.075636	0.321657		HS3ST2	6.01789	12.3246	14.9654	0.303073	4.30667	9.21116	17.9746	10.7886
HTR4	0.057072	0	0.104774	0	0.056806	0.428804	0.891254	0.296085		HTR3A	0.271703	0.462855	0.336404	0.059743	0.158229	0.066446	0.136449	0.149694		HTR3A	0.03658	0.324843	0.477629	0	0.126364	0.101567	0.0262	0.057617		HTR3B	0	0	0.849293	0.041649	0.473097	1.47342	3.51655	1.14011		HSD17B7	2.0929	1.99104	0.76363	0.754693	1.03137	0.37068	1.33528	0.830101
HTR5A	0.622317	1.76773	6.59502	0.088711	0.721055	5.11146	12.2221	3.58667		HTR3B	0.086402	0.034252	0.979306	0	0.182971	2.15802	3.97483	1.60643		HTR3B	0	0.03467	0.894808	0	0.585418	1.14006	1.81077	1.86322		HTR3C	0	0	0	0	0	0.031529	0	0		HSPA1A	6.52553	14.3293	6.13549	3.74327	3.1285	4.2039	5.68008	7.20033
HTR6	0.063845	0.259284	2.28555	0.071948	0.450838	1.6027	2.21052	0.800451		HTR3C	0	0	0	0	0	0	0	0		HTR3C	0	0	0	0	0	0	0	0		HTR3D	0	0	0	0	0	0	0	0.029458		HSPA1B	7.4101	12.2388	3.35596	3.01955	1.90709	3.02096	4.67028	6.35913
HTR7	1.7592	1.60201	0.98995	0	0.163671	0.763208	0.569512	0.630605		HTR3D	0.034128	0	0	0	0	0	0	0		HTR3D	0	0	0	0	0	0.006295	0	0		HTR3E	0	0	0	0	0	0	0	0		HSPA1L	1.62163	1.71974	1.6078	0.103688	0.906627	1.15809	2.45449	2.32906
ICAM1	0.158079	1.54949	0.558186	0.209437	0.059534	0.375099	0.865485	1.42631		HTR3E	0	0	0.131485	0	0	0.028387	0.035399	0		HTR3E	0.022391	0	0.065158	0	0	0	0	0		HTR4	0.038839	0	0.255941	0	0	0.116613	0.498704	0.376208		HTR1A	17.7749	8.33028	3.34877	0.078727	0.266964	3.51272	5.40769	2.3914
IFNG	0	0	0	0	0	0	0	0		HTR4	0	0.030386	0.257734	0.062811	0	0.38219	0.757344	0.346864		HTR4	0.074283	0	0.139384	0	0.116983	0.372286	0.621184	0.312704		HTR5A	0.611715	1.17758	7.00081	0	1.9434	3.63914	11.1986	4.5413		HTR1B	0.913865	0	0.563105	0	0.108319	1.07925	1.58811	0.371887
IGF1	0.495125	0.797627	0.811352	0.320175	0.358859	0.17104	0.845269	0.245101		HTR5A	0.777798	1.87147	7.60423	0.214249	1.06074	4.8531	12.2564	4.89719		HTR5A	0.971544	3.09172	3.17574	0	2.57981	3.71221	6.47683	5.7426		HTR6	0.043447	0.160035	1.86297	0	0.480645	1.29042	2.29381	0.939288		HTR1D	0.463094	0.62694	1.28187	0	0.456782	0.595429	0.814507	0.470301
IGF1R	10.1589	5.12813	3.64854	0.345451	0.117277	1.98558	4.47559	3.93196		HTR6	0.131372	0.398548	1.2343	0	0.620317	1.692	1.71251	0.886855		HTR6	0.103136	0.528371	0.874645	0.08475	0.412377	1.49318	1.12064	0.956947		HTR7	1.63822	1.7963	1.05299	0	0.13755	0.363613	0.704807	0.325185		HTR2C	0.194147	0.034608	1.44848	0	0.07173	1.82557	2.72026	0.216821
IGFBP3	0.80701	3.62968	4.06322	0.620334	0.299276	1.87109	1.6808	0.823306		HTR7	2.62561	2.47003	1.31535	0	0.278654	0.486034	0.640478	0.334262		HTR7	2.79146	4.64544	1.12907	0.071777	0.107126	0.792538	1.4545	0.266912		ICAM1	0.064448	0.569519	1.17512	0.350823	0.171541	0.271346	0.694328	1.17562		HTR3A	0.128372	0.343186	0.387654	0	0.215911	0	0.049342	0.027431
IL10	0.137651	0.085403	0	0	0	0	0	0		ICAM1	0.107936	0.701777	0.257064	1.46782	0.11739	0.406862	0.908644	1.81125		ICAM1	0.15419	0.94714	0.439794	0.818561	0.564314	0.319576	0.888048	1.31355		IFNG	0	0	0	0	0	0	0	0		HTR3B	0	0.034861	1.12079	0.122448	1.0166	1.2125	4.18314	1.19299
IL10RA	0.31339	0.697218	0.797993	0.054674	0.118114	0.465151	0.74255	0.856471		IFNG	0	0	0	0	0	0	0	0		IFNG	0	0	0	0	0	0	0	0		IGF1	0.547244	0.219993	1.64294	0.357302	0.095896	0.190961	0.215361	0.527247		HTR3C	0	0	0	0	0	0	0	0
IL12A	0.090898	0.652802	0.210643	0.078925	0.054877	0.080846	0.250411	0.386677		IGF1	0.442165	0.395614	1.63531	0.288914	0.386128	0.019249	0.732245	0.156871		IGF1	0.175916	0.469624	0.354868	0.077193	0.809771	0.288725	1.03545	0.603998		IGF1R	10.0304	2.21017	1.8733	0.243364	0.102845	2.09081	3.50858	3.51513		HTR3D	0.032931	0	0	0	0	0	0	0
IL12B	0	0	0	0	0.074019	0.00695	0.090241	0		IGF1R	9.60266	3.13692	3.51514	0.4992	0.284367	1.7479	4.31992	3.05253		IGF1R	5.61021	6.21392	1.71351	0.333768	0.764349	1.96565	3.01936	4.76277		IGFBP3	1.48215	1.53131	3.08573	0.842939	1.11813	1.39002	2.12034	1.05446		HTR3E	0	0	0	0	0	0	0.033117	0
IL17RA	0.273756	0.531831	1.73628	0.23712	0.195182	1.3316	1.72577	1.83981		IGFBP3	0.569904	2.0573	4.66918	1.94092	0.494063	1.60477	2.87434	1.97338		IGFBP3	1.08478	1.98993	2.11026	1.66685	1.43861	1.3578	2.74202	2.01241		IL10	0	0	0.308649	0	0.042514	0	0.171559	0.082867		HTR4	0.090383	0.030951	0.159782	0	0.057136	0.112702	0.823766	0.399859
IL18	0.144635	0	0.484401	0.828176	1.02912	0.347126	0.053992	0.15285		IL10	0	0.089482	0	0.135178	0	0	0	0.079548		IL10	0	0	0.083761	0	0.092131	0	0	0		IL10RA	0.393962	0.1439	0.595382	0.053254	0	0.385809	1.50166	0.840994		HTR5A	1.46652	1.17487	3.71787	0.092961	1.33068	3.34776	8.84138	3.89188
IL18BP	1.53049	0.875911	0.491866	0.153034	0.487688	0.643329	1.28001	0.86433		IL10RA	0.198762	0.304732	0.767636	0.165236	0.105704	0.447808	0.997572	0.493216		IL10RA	0.320212	0.299046	0.703348	0.128804	0.395084	0.208719	0.679549	0.54696		IL12A	0.319429	0.712785	0.243912	0.738132	0	0.10961	0.195345	0.204484		HTR6	0.567029	0.5056	0.662128	0.096791	0.347651	0.457402	1.26756	0.861922
IL18R1	0	0.027842	0.183792	0	0	0.023054	0.116016	0.267512		IL12A	0.227922	0.251007	0.132671	0.259117	0.193715	0	0.338351	0.41754		IL12A	0.549662	0.366683	0.091582	0.729902	0.14455	0.218948	0.345397	0.298927		IL12B	0	0	0	0	0	0	0	0		HTR7	6.4582	3.11874	1.04262	0	0.170554	0.300709	0.816991	0.447287
IL18RAP	0	0.025101	0	0	0	0	0	0		IL12B	0	0	0	0	0	0.031573	0	0		IL12B	0	0	0	0	0	0	0.034456	0		IL17RA	0.458209	0.09574	1.95433	0.056903	0.966771	0.982858	1.76308	1.7644		ICAM1	0.227226	1.14264	0.300603	0.186677	0.294767	0.260668	0.391144	1.30292
IL1A	0	0	0	0	0.021502	0.018096	0.445954	0		IL17RA	0.180922	0.489011	1.5567	0.564371	0.307831	1.18142	1.6572	1.55611		IL17RA	0.163587	0.478726	0.897583	0.298891	0.804461	0.760653	0.931921	1.50117		IL18	0.097096	0.686619	0	0.82112	0.42181	0.231629	0.878066	0.309071		IFNG	0	0	0.101041	0	0	0	0	0
IL1B	0.103895	0.156674	0.381466	0	0.088038	0.239584	1.08271	0.184657		IL18	0.09116	0.081471	0.340884	0.471085	1.09299	0.361281	0.556792	0.364117		IL18	0	0.317389	0.064224	0.062268	0.730817	0.628669	0.884705	0.021783		IL18BP	0.280986	0.709248	1.20975	0.343326	0.340779	0.35059	1.06769	1.22863		IGF1	0.578873	0.133354	1.2771	0	0.313539	0.547734	0.594994	0.509628
IL1RN	0	0.596462	0	0	0	0	0	0		IL18BP	0.75018	0.71359	0.687118	0.727077	0.322525	0.986703	0.851817	0.796459		IL18BP	0.576631	1.0496	0.410936	0.552971	1.72189	0.436431	0.868109	1.17841		IL18R1	0.033833	0	0.113005	0	0	0	0.07323	0.027015		IGF1R	9.77769	1.56554	1.77696	0.12034	0.110335	0.841764	2.77922	3.37387
IL2	0	0	0	0	0	0	0	0		IL18R1	0.017284	0	0	0	0.027698	0	0.126109	0.076748		IL18R1	0.033961	0.027554	0.030253	0	0	0	0.072477	0.079515		IL18RAP	0	0	0	0	0	0	0	0		IGFBP3	1.65305	1.65238	2.65944	1.14679	0.434626	1.23905	2.9367	1.64221
IL2RB	0	0.210795	0	0	0	0.044691	0.015092	0.10837		IL18RAP	0	0.039968	0.050174	0	0	0	0.037555	0		IL18RAP	0.061655	0	0	0	0.026713	0.021109	0	0		IL1A	0	0	0	0	0	0	0.439309	0		IL10	0	0	0	0.310101	0.068902	0	0	0
IL3	0	0	0	0	0	0	0	0		IL1A	0	0.05889	0	0	0	0	0.06189	0.000707		IL1A	0	0.165298	0	0.129503	0.068827	0.048569	0.259046	0.239642		IL1B	0.069747	0	0.557215	0	0.362893	0.210133	1.81157	0.111383		IL10RA	0.678003	0.744992	0.437801	0	0.169667	0.233139	0.840734	0.653656
IL3RA	9.54628	0.655908	0.576487	0.470713	0.462383	0.269504	0.74812	2.22186		IL1B	0.077039	0.234893	0.811654	0	0.224321	0.20998	1.04813	0.285786		IL1B	0.07097	0.227211	0.14011	0.169597	0.679319	0.068763	0.743984	0.163921		IL1RN	0	0.244415	0	0	0	0	0.203959	0		IL12A	0.099115	0.376005	0.202232	0.230522	0.408751	0.549213	0.522493	0.161141
IL3RA	0	0	0	0	0	0	0	0		IL1RN	0	0.155997	0.1666	0	0	0	0	0		IL1RN	0	0.153486	0	0	0.061606	0.129539	0	0.072493		IL2	0	0	0	0	0	0	0	0		IL12B	0	0	0	0.06127	0	0	0	0
IL4	0.30077	0	0	0	0.090791	0	0	0		IL2	0	0	0	0	0	0	0	0		IL2	0	0	0	0.081814	0	0	0	0		IL2RB	0.03257	0.028937	0.216102	0.031865	0	0.049231	0	0.051662		IL17RA	0.364487	0.378023	1.05304	0.298688	0.34833	0.700617	1.35693	1.97329
IL4R	0.697913	1.08963	0.588332	0.237172	0.110365	0.379684	0.574569	1.16468		IL2RB	0.072849	0.055031	0	0.052674	0	0.025204	0	0.050919		IL2RB	0.033141	0	0	0	0	0.045387	0.035363	0		IL3	0	0	0	0	0	0	0	0		IL18	0	0	0.199529	0.646273	2.93211	1.78387	0.536818	0.200495
IL6	0	0	0	0	0	0	0.210208	0		IL3	0	0	0	0	0	0	0	0		IL3	0	0	0.087386	0	0	0	0	0		IL3RA	4.99982	1.22602	0.585646	0.782525	0.352732	0.359006	0.770893	1.35944		IL18BP	1.47345	0.37226	0.379087	0	0.290271	0.337723	1.01262	1.13504
IL6R	0.118665	0.522209	0.656506	0	0.089186	0.314061	0.680129	0.878064		IL3RA	5.50154	0.912473	0.582389	0.959999	0.398919	0.285066	0.739205	0.816743		IL3RA	3.46475	1.48954	0.882621	1.02821	0.826376	0.356798	1.05798	1.09672		IL3RA	0	0	0	0	0	0	0	0		IL18R1	0	0	0.088339	0	0.068522	0	0.093315	0.075713
IL9	0	0	0	0	0	0	0	0		IL3RA	0	0	0	0	0	0	0	0		IL3RA	0	0	0	0	0	0	0	0		IL4	0.204678	0	0	0	0	0.089412	0	0		IL18RAP	0	0	0	0	0.022744	0	0	0.02296
IMPA2	0.606314	0.635491	0.263686	1.96099	1.21455	0.747385	0.693476	1.96096		IL4	0	0	0.021047	0	0	0.094775	0	0		IL4	0.090938	0	0	0	0	0	0	0		IL4R	0.711669	0.89994	0.73321	0.224079	0.080748	0.456236	0.965856	0.807416		IL1A	0	0	0.123865	0.120146	0	0	0.127595	0.154939
INPP4A	9.08859	12.3984	16.3152	0.191264	0.290553	9.05112	15.9056	5.92177		IL4R	0.873276	0.770947	0.915896	0.412043	0.186952	0.303644	0.961109	1.02882		IL4R	0.50822	0.872882	0.444526	0.312273	0.610733	0.271946	0.737542	0.934603		IL6	0	0.034591	0	0.060797	0	0	0.134502	0.048948		IL1B	0	0.167486	0.26895	0	0.151097	0.051816	0.51065	0.507976
INPP4B	0.198812	0.392124	2.00108	0.521553	0.311534	1.21125	1.9742	2.55768		IL6	0	0.052141	0	0.09914	0	0.047439	0.073408	0.159103		IL6	0	0	0.046555	0	0.501303	0	0.06566	0		IL6R	0.040651	0.035147	0.436222	0	0.297783	0.181847	0.764543	0.703591		IL1RN	0	0.152245	0.082028	0	0.136751	0	0	0.069026
INPP5A	5.12221	6.02355	7.36612	0.45635	1.73878	7.64349	10.0336	6.67407		IL6R	0.080838	0.198203	0.143743	0.064855	0.043383	0.124557	0.846126	0.678986		IL6R	0.120761	0.604425	0.181257	0.079296	0.279531	0.139898	0.339505	0.602334		IL9	0	0	0	0	0	0	0	0.148413		IL2	0	0	0	0	0	0	0	0
INPP5D	0.495509	1.04832	0.902802	0.190929	0.231562	0.507781	1.40306	1.01575		IL9	0	0	0	0.158106	0	0.101789	0	0		IL9	0	0	0	0	0.138205	0	0.062828	0.056833		IMPA2	0.568305	1.15689	0.815135	2.16224	2.99517	1.02004	0.954848	1.73609		IL2RB	0.038417	0.018021	0	0	0	0.120657	0.030216	0
INPPL1	2.20453	2.73609	4.1805	0.809276	0.889287	2.54905	4.15495	7.73233		IMPA2	0.241498	0.700395	0.762732	2.82301	1.44654	1.63196	1.27587	1.85954		IMPA2	0.481021	1.02429	0.670594	2.62712	2.22243	1.08407	1.29432	2.09183		INPP4A	8.67435	5.64487	8.7162	0.240791	0.308008	6.90415	14.4164	5.84621		IL3	0	0	0	0	0	0	0	0
INS	0.036236	1.00322	1.66052	0.116224	0	0.209393	0.211748	0.549912		INPP4B	0.877332	0.620092	2.2213	0.578872	0.785741	1.28879	2.13734	1.64636		INPP4A	6.66233	12.1841	7.73558	0.38339	2.0952	7.45821	13.04	6.85241		INPP4B	0.459063	0.184748	1.4	0.56478	0.183914	1.31174	1.53277	1.76177		IL3RA	5.47193	1.66546	1.23439	0.868803	0.61427	0.36394	0.361342	0.866451
IRS1	9.61179	11.737	5.53361	0.02554	0.067673	2.37539	3.85363	3.11576		INPP5A	4.22674	5.1528	10.3275	1.2945	2.50655	5.47263	11.7562	7.04082		INPP4B	0.388055	0.356587	1.45444	0.33862	0.806277	1.37199	1.68435	2.19204		INPP5A	5.39637	4.75677	6.44444	0.29534	2.3621	4.67045	9.44796	7.02122		IL3RA	0	0	0	0	0	0	0	0
ITGA3	3.80459	3.39057	4.10984	0.231629	0.4078	2.32307	2.23015	2.15659		INPP5D	0.322348	0.749932	1.03888	0.341392	0.193162	0.467928	0.92532	1.17289		INPP5A	3.71271	5.27804	6.90621	0.994055	3.66791	5.16545	10.1022	8.77841		INPP5D	0.53897	0.455284	1.26958	0.089992	0.550994	0.512589	1.42576	1.51036		IL4	0.039042	0.073185	0	0	0.091318	0	0	0.009966
JAG1	1.47613	2.49591	2.75943	0.025866	0.103115	1.4235	1.60512	2.5734		INPPL1	1.63274	3.47089	4.04863	2.17643	1.40785	2.77328	3.7533	5.85874		INPP5D	0.216999	0.807118	0.556794	0.429131	0.365469	0.31182	0.936645	1.1664		INPPL1	2.79429	2.42717	3.93605	0.795938	2.12832	1.92664	3.81848	5.88344		IL4R	0.977515	0.74128	0.620423	0.295777	0.087064	0.256338	0.56871	1.02153
JAG2	11.1523	6.53387	5.11713	0.269645	0.528414	3.09244	6.35121	4.50063		INS	0.198833	0.919158	0.747914	0.111971	0	0.188625	0.454248	0.293597		INPPL1	1.79894	4.54741	2.63451	1.1075	1.64677	2.07553	3.40062	5.76397		INS	0.070184	0	0.690634	0.137331	0.251814	0.158047	0.845773	0.340667		IL6	0	0.0502	0	0.107835	0.225454	0	0.027667	0.129701
JARID2	7.12533	4.39876	2.83442	0.095458	0.11989	1.39122	2.94499	2.68059		IRS1	7.97106	11.8631	4.51335	0.249425	0.115215	2.3712	3.25403	2.41155		INS	0	0.488941	0.249333	0	0.240076	0.013127	0.204189	0.281061		IRS1	7.30918	5.81512	4.53579	0.030178	0.338162	1.65064	3.114	2.80777		IL6R	0.187286	0.098518	0.281642	0.204956	0.059398	0.324497	0.29612	0.924747
KCNH1	0.141818	0.052724	2.23833	0.175799	0.232716	4.86109	10.2104	2.20108		ITGA3	3.52472	3.81084	3.12062	0.46034	0.432895	1.87115	2.62744	2.10306		IRS1	4.46485	11.4866	2.15043	0.090253	0.876147	1.47287	2.63037	3.16485		ITGA3	3.26118	2.1619	2.95653	0.274835	0.701482	1.6995	2.35692	2.55393		IL9	0	0	0.054898	0	0	0	0	0
KCNH2	4.99231	8.07061	6.60183	0.112432	1.65819	5.56688	8.1743	5.63396		JAG1	1.5973	2.31802	2.04773	0.547893	0.308385	1.45539	2.03697	1.95174		ITGA3	2.85299	4.76945	2.59818	0.104135	1.05896	1.83026	1.89671	2.4794		JAG1	2.05316	1.39044	1.85279	0.13609	0.087177	1.50583	2.11576	2.04589		IMPA2	0.861559	1.14109	0.645751	1.62563	2.85042	2.21879	0.383151	1.97446
KCNH5	0.705981	1.44259	3.3552	0.366397	0.283298	3.27931	5.33789	0.960943		JAG2	5.03362	6.17732	6.5613	0.337233	0.32649	3.56244	3.96179	3.40707		JAG1	0.832251	2.40306	1.03865	0.482555	0.39808	1.32619	1.67868	2.24724		JAG2	5.38173	5.19639	5.06612	0.296059	0.907566	2.58108	3.99596	2.99057		INPP4A	13.7775	5.02516	9.95095	0.347523	0.229345	5.49007	13.1038	4.83815
KCNN3	0.605686	0.369256	1.21104	0.170929	0.290937	0.823037	2.24293	5.08736		JARID2	4.38448	3.12333	4.23687	0.140169	0.224912	1.1981	2.76492	2.34753		JAG2	4.16434	7.60926	3.13058	0.358946	1.038	2.73903	2.43681	3.13441		JARID2	6.29347	2.63932	2.48128	0.071396	0.055026	1.58103	2.52856	2.97233		INPP4B	0.140753	0.178744	2.06265	0.561841	0.625877	1.80113	1.96345	1.99965
KIAA1217	1.497	0.887883	5.37097	0.064513	0.369401	4.0585	5.31616	3.16249		KCNH1	0.194281	0.08076	3.96185	0.124863	0.26723	4.06988	9.54606	3.89634		JARID2	3.68267	5.09152	1.65436	0.264361	0.388511	1.31373	2.22055	2.96696		KCNH1	0.269444	0.113846	2.05664	0.074516	0.347227	3.28636	9.51465	4.06972		INPP5A	4.72966	3.71059	7.58117	0.667125	3.48191	5.03563	11.5706	7.01604
KIF13A	1.89777	1.5356	2.14702	0.10358	0.247237	1.37817	1.98135	4.33023		KCNH2	3.26423	8.70522	6.24033	0.813121	1.49759	5.88157	6.80343	5.15657		KCNH1	0.193486	0.078598	0.774104	0.293066	1.39531	3.26263	5.60939	4.90915		KCNH2	4.3097	6.14929	7.71992	0.124989	2.4681	4.14072	7.84641	5.26794		INPP5D	0.348709	0.571679	0.786622	0.188307	0.227139	0.347314	0.75744	1.13769
KIF17	1.18864	1.88226	7.79597	0.507435	3.76483	3.28749	6.7706	4.17117		KCNH5	2.94457	1.40567	5.7599	0.297719	0.568086	2.59784	6.22287	1.19995		KCNH2	3.14141	8.77148	4.69388	0.203357	2.46144	4.54626	4.72818	5.71737		KCNH5	0.751826	0.419099	1.9964	0.090053	0.473718	1.98643	4.66213	1.62376		INPPL1	2.52773	2.18517	2.6217	0.51053	1.15143	2.16751	2.71678	5.34923
KLF5	0.557026	0.745225	1.04088	0	0	0.575108	0.424238	0.473616		KCNN3	1.21421	0.515542	1.21467	0.470802	0.247197	0.458411	1.21744	2.6251		KCNH5	1.43847	1.12098	0.757694	0.107533	0.489614	2.07094	3.0258	2.22677		KCNN3	0.991606	0.22693	0.596043	0.226276	0.68642	0.860942	1.58283	3.11109		INS	0	0.350141	0.185798	0.121792	0	0.30723	0.234359	0.208463
KLK8	0	0	0	0	0.06051	0.085148	0	0		KIAA1217	1.43079	0.833888	5.62508	0.170154	0.715979	3.71379	5.70104	2.87245		KCNN3	0.206165	0.556526	0.504033	0.451144	0.538968	0.474831	1.86037	3.05664		KIAA1217	1.51273	0.583933	3.97097	0.085823	0.729045	3.70509	5.12071	3.41979		IRS1	15.0183	5.82036	2.33698	0.060399	0.152382	1.57281	2.81704	2.47602
KMO	0.023356	0.030384	0.201941	0.09	0.357707	0.572971	0.313925	0.167387		KIF13A	2.42488	1.30258	2.31	0.318119	0.328779	1.16542	2.8219	3.40934		KIAA1217	1.03548	0.916433	3.19216	0.292595	1.27814	2.67085	4.54559	3.99976		KIF13A	2.30611	0.939141	1.1699	0.16808	0.346502	2.15445	2.91598	4.85851		ITGA3	7.0386	2.63126	2.19148	0.177999	0.455267	1.15308	1.89371	2.50885
KPNA3	11.8846	15.0215	9.91218	0.498112	0.326193	5.79421	13.8717	5.30571		KIF17	1.62624	4.40706	6.6746	0.74835	2.28176	3.58123	6.53438	4.31356		KIF13A	1.94039	1.93218	1.21047	0.363822	0.655171	2.09367	3.01391	4.16275		KIF17	0.985415	1.52568	5.79218	0.251846	6.48062	2.24476	6.46044	4.21309		JAG1	1.44048	1.40862	1.50499	0.308415	0.248571	2.04012	1.43472	1.85483
KREMEN1	3.32126	3.6101	3.40183	0.252101	0.233302	2.00107	3.10215	3.37353		KLF5	0.799418	0.577347	1.28482	0.066694	0.189306	0.163938	0.521658	0.288231		KIF17	1.81088	4.42014	5.63485	0.599579	3.89793	2.92925	4.55672	4.27836		KLF5	0.763777	0.507003	1.504	0.087326	0	0.566529	0.66273	0.721767		JAG2	14.5186	5.78604	2.52679	0.132632	0.346938	1.91469	2.04979	2.79606
LGI1	5.98596	5.65677	15.1152	6.03702	5.81759	13.2936	16.8501	13.893		KLK8	0	0	0	0	0.054964	0.081672	0	0		KLF5	0.502414	1.0177	1.41389	0.081545	0.144462	0.600095	0.488304	0.312353		KLK8	0	0	0	0	0	0.137528	0	0		JARID2	7.74298	1.73833	2.1476	0.052499	0.087357	0.634446	1.80173	2.69985
LIF	0.138698	0.057984	0	0	0	0	0	0		KMO	0	0.037428	0.344589	0.564681	0.630345	0.411053	0.6319	0.315521		KLK8	0	0	0	0	0.126189	0	0	0		KMO	0.055374	0.020221	0.46289	0.204161	0.368683	0.600001	0.341805	0.258877		KCNH1	0.692897	0.015593	1.62407	0.06699	0.137179	1.34635	7.91549	2.37187
LMOD1	0.327643	0.41027	3.46345	1.87848	1.06561	1.27796	1.90928	3.45516		KPNA3	15.0023	12.4404	11.0237	0.72612	1.05205	6.23548	9.97274	5.85085		KMO	0.019557	0	0.36081	0.285036	0.227675	0.436777	0.493155	0.280689		KPNA3	13.7188	9.86608	5.30475	0.616897	0.533793	6.83363	9.5747	6.53715		KCNH2	8.12233	6.82212	3.34408	0.218905	1.41916	3.07413	5.711	5.65637
LMX1A	0	0	0	0	0	0	0	0		KREMEN1	3.89882	2.07301	3.31879	0.252086	0.154149	1.16562	3.34954	2.5405		KPNA3	11.9724	15.3977	7.50558	0.616413	1.15772	5.39344	11.8082	7.23738		KREMEN1	3.3092	1.04509	1.96706	0.11285	0.141782	1.3237	2.39315	2.07703		KCNH5	0.906153	0.610568	1.87847	0.222925	0.095043	1.30236	3.57247	1.06561
LMX1B	0	0	0	0	0	0	0	0		LIF	0	0.074916	0	0	0	0	0	0		KREMEN1	1.58549	2.26216	1.9829	0.521955	0.57725	1.60796	3.11817	2.49922		LGI1	6.93356	6.33877	14.3138	5.83752	12.0342	12.5632	18.5061	11.8111		KCNN3	0.721029	0.186552	1.01828	0.178511	0.246301	0.509017	1.03815	3.13262
LST1	0.147186	1.81539	7.21839	14.1495	9.35648	1.62272	4.21108	4.2283		LMOD1	0.208033	0.124367	1.36246	2.58869	1.07009	1.51279	4.09687	3.39696		LIF	0	0	0	0.184112	0	0	0	0		LIF	0	0.32195	0	0	0	0	0	0		KIAA1217	2.08705	0.886114	5.00085	0.162571	0.320474	1.56139	5.16237	4.19057
LTA	0	0.065232	0	0	0	0	0	0		LMX1A	0	0	0	0	0	0	0	0		LMOD1	0.467227	0.312328	2.17903	1.94017	6.47399	1.77134	2.50508	3.91344		LMOD1	0.345703	0.225565	1.717	1.42518	1.38286	1.33445	2.21811	2.99538		KIF13A	3.24138	1.36359	1.77848	0.089388	0.289686	1.06409	1.80008	4.63516
LTB	0	0.723962	0.421375	0.129331	0.441478	0.106435	0.264188	1.35341		LMX1B	0	0	0	0	0	0	0	0		LMX1A	0	0	0	0	0	0	0.05263	0		LMX1A	0	0	0	0	0	0	0	0		KIF17	2.8596	3.24395	3.88026	0.289405	3.16215	2.5601	4.92527	3.30053
MAGI1	4.64517	2.45444	11.871	0.219944	0.480393	5.44383	10.7126	5.35902		LST1	0.459442	0.869594	1.57165	11.0945	5.56936	1.51384	3.32465	2.87266		LMX1B	0	0	0	0	0	0	0	0		LMX1B	0	0	0	0	0	0	0	0		KLF5	0.862419	0.232744	1.26072	0	0.014959	0.173889	0.671078	0.464791
MAGI2	8.57704	6.74675	11.985	0.389026	0.646343	6.81019	11.612	6.52076		LTA	0.11503	0	0	0	0	0	0	0.064283		LST1	0.045141	0.874002	2.80022	6.5512	12.9922	2.00589	4.21251	2.3258		LST1	0.574401	1.39562	2.12161	9.66948	15.3848	1.38708	4.30054	3.32656		KLK8	0	0	0	0	0.104956	0.181922	0.089634	0.070218
MAGI3	4.64241	4.22367	3.65568	0.373446	0.20813	2.90434	5.1544	2.7402		LTB	0.076589	0.868727	0.419912	0.631527	0.451653	0	0.096157	0.152725		LTA	0	0.067339	0.003124	0	0	0	0.092305	0.060849		LTA	0	0	0	0	0	0	0	0.067882		KMO	0.004176	0.199224	0.323945	0.225991	0.424274	0.566648	0.585603	0.17932
MANBA	2.69362	3.05047	1.41804	0.071247	0.294088	1.12581	1.98011	2.06313		MAGI1	3.79452	1.50993	12.8613	0.352571	0.643901	4.35171	10.4619	4.35477		LTB	0.251074	0.569006	0.320862	0.152342	0.739447	0.127082	0.083652	0.158025		LTB	0.065434	0.135973	0.358178	0.122874	2.68925	0.292325	0.335799	0.411506		KPNA3	8.97551	5.2023	11.0827	0.719526	0.596982	5.00843	11.835	6.28535
MAOA	1.94175	2.8202	8.73512	1.44267	0.989115	3.30116	4.16531	13.999		MAGI2	7.81419	5.23131	12.0227	0.727866	0.615107	6.38982	10.9898	7.57934		MAGI1	2.64667	2.84623	4.97304	0.475445	1.12631	4.60308	6.8559	6.00875		MAGI1	4.27112	1.26618	5.48798	0.088662	0.477987	4.57215	11.6963	5.25063		KREMEN1	4.16669	1.085	2.00543	0.133442	0.317972	1.95916	2.51117	2.07955
MAOB	2.15824	2.57155	9.85876	0.771789	1.86575	11.8526	15.185	18.2573		MAGI3	6.82022	3.24548	4.72017	0.452056	0.594263	2.62086	6.71858	3.6582		MAGI2	6.08404	8.51234	5.19012	0.639987	2.08109	6.02573	8.3794	8.98318		MAGI2	8.33991	4.41958	6.33707	0.401283	0.429946	6.39823	9.80791	8.81813		LIF	0.062333	0.075217	0	0	0	0	0	0
MAPK14	5.15937	7.38843	10.079	0.150235	0.565151	6.1517	8.07993	5.48778		MANBA	3.45965	2.67092	1.79551	0.483747	0.575031	1.10731	2.53579	1.89149		MAGI3	4.89797	4.45682	2.23556	0.716644	1.18402	2.74478	4.76728	4.52169		MAGI3	7.02581	2.42669	1.63505	0.254755	0.322774	2.60004	5.21534	3.62032		LMOD1	0.447715	0.304999	2.3805	1.10695	1.38231	2.1523	1.68802	2.59069
MAT1A	0.069787	0.039081	0	0	0	0	0.323499	0		MAOA	2.22903	1.86791	7.88793	1.95518	2.02308	4.4857	4.73273	8.83059		MANBA	3.9091	3.57613	1.42945	0.211807	0.801535	1.63491	2.51824	2.18521		MANBA	2.57967	2.3784	1.68281	0.172952	0.238519	1.67538	2.64102	2.50736		LMX1A	0	0.039694	0	0	0	0	0	0
MC5R	0.605808	0.43029	0.055822	0	0.019207	0.040131	0	0		MAOB	2.81498	3.69748	11.3431	2.0315	3.70431	10.9821	14.7245	16.0948		MAOA	2.40898	3.76435	5.92605	2.97152	1.71845	4.39533	5.57634	10.3302		MAOA	3.18836	2.52182	4.58801	1.23422	1.48962	4.64553	4.62563	9.17745		LMX1B	0	0	0	0	0	0	0	0
MCHR1	1.13784	1.05477	3.7332	0.075069	2.46352	11.0155	10.2845	4.34225		MAPK14	7.88179	5.8809	8.06682	0.637217	1.02543	4.85292	10.1915	4.84572		MAOB	6.26883	6.25662	12.1367	1.84035	3.10181	13.9004	18.1538	17.0959		MAOB	2.86788	3.36807	8.41924	1.04513	4.64485	9.36275	16.2961	15.6433		LST1	0.382939	1.30288	2.24031	10.5104	11.4271	3.41567	2.01106	2.57432
MCHR2	1.27619	2.70132	8.43305	0.184476	0.467746	7.05853	7.17784	1.5735		MAT1A	0	0	0	0	0	0	0	0		MAPK14	6.32938	7.46136	5.48018	0.471478	1.95141	5.03954	8.57528	5.20242		MAPK14	6.85121	4.8671	6.22724	0.423711	0.544551	4.26141	7.97784	4.74201		LTA	0.223586	0	0.076046	0.115191	0.063389	0	0.078869	0
MCTP2	0.061134	0.115428	0.052272	0	0	0.210283	0.441468	0.09526		MC5R	1.23452	0.503516	0.271011	0	0.011891	0	0	0		MAT1A	0	0	0	0	0	0	0	0		MAT1A	0	0	0	0	0	0	0	0		LTB	0.349989	0.566109	0.334339	0.05128	0.515463	0.570052	0.284935	0.213947
MED12	4.68199	4.48288	1.73761	0.185586	0.162803	1.09933	2.16935	2.82281		MCHR1	0.831066	2.33258	3.9766	0.429971	1.85341	9.55796	9.69949	4.52106		MC5R	1.08887	0.790763	0.239115	0	0.10176	0.122269	0	0.091857		MC5R	0.331082	0.412938	0.388107	0	0	0.044208	0	0.046391		MAGI1	3.13068	0.760482	6.69562	0.249064	0.265575	2.16654	7.2417	4.07091
MEGF10	0.940792	1.47226	0.917571	0.081582	0.083901	0.84691	2.36659	5.68315		MCHR2	5.3207	4.6056	11.7293	0.107852	0.848379	5.59058	8.54111	2.66417		MCHR1	0.491928	0.779289	4.15538	0.175657	3.00497	9.09459	7.42954	5.23019		MCHR1	0.135996	0.556229	4.04903	0.088702	4.5925	6.4381	10.8408	4.54452		MAGI2	10.6976	3.17069	7.70644	0.276995	0.503334	2.76438	8.08224	8.3717
MET	0.154439	0.136851	1.34672	0.021609	0.0285	2.13282	4.13676	0.4845		MCTP2	0	0.009564	0	0	0.016725	0.097024	0.415738	0.09331		MCHR2	0.670927	0.843687	4.46287	0.328168	0.834739	4.33811	5.65918	3.21615		MCHR2	2.2909	1.75279	5.94033	0.054865	1.224	5.40233	7.76834	2.89035		MAGI3	2.26765	1.46219	4.02959	0.284983	0.316811	1.62234	5.9471	3.06614
MFRP	0	0	0	0	0	0	0	0		MED12	3.86607	4.16355	1.70244	0.24557	0.135457	1.05909	1.72032	2.46145		MCTP2	0.02088	0.016941	0	0	0.016986	0.029776	0.327792	0.146885		MCTP2	0.014247	0	0.069478	0	0	0.206619	0.223266	0.187642		MANBA	1.29683	1.74772	1.28307	0.148812	0.599988	1.05791	2.79882	2.03312
MICB	0.138786	0.018255	0.311983	0.078732	0.136258	0.096754	0	0		MEGF10	0.794242	0.88903	0.724494	0.454032	0.138762	1.05999	2.02298	5.36288		MED12	3.24271	5.25886	1.19855	0.246675	0.527453	1.22971	1.50335	2.45571		MED12	4.89014	3.12712	1.19182	0.176256	0.239418	1.76369	1.79573	2.8196		MAOA	1.5296	1.69966	6.07493	1.45689	1.34784	5.53977	3.46669	8.84996
MTHFD1	5.27475	8.55885	6.33677	0.532785	1.44582	5.39224	6.12921	6.21585		MET	0.169733	0.07546	1.89938	0	0.160901	2.22266	3.23278	1.22893		MEGF10	0.471481	1.45319	0.458019	0.157092	0.412395	1.34082	3.25665	6.61513		MEGF10	2.41984	0.639584	0.92874	0.064705	0.061386	2.83766	2.51048	7.29141		MAOB	1.57238	1.07212	9.12705	0.560572	2.29449	7.98653	15.6576	12.6474
MTHFR	3.60357	2.26878	4.7607	0.093539	0.585948	2.32803	3.20813	2.9947		MFRP	0	0	0	0	0	0	0	0		MET	0.126204	0.212977	0.634181	0	1.30161	0.525097	1.39975	1.51557		MET	0.208255	0.050538	1.18703	0.004831	0	1.82399	4.024	1.5686		MAPK14	9.39276	3.12142	7.662	0.37347	0.815388	5.58941	8.86337	3.78383
MTR	2.60286	0.937949	1.25591	0.087504	0.033313	0.409732	1.30856	1.43148		MICB	0	0.277634	0.339687	0.202617	0.009599	0.036792	0.349642	0.271255		MFRP	0	0	0.028974	0	0	0	0	0		MFRP	0	0	0	0	0	0.005664	0	0		MAT1A	0	0	0	0	0	0	0	0
MUTED	4.29472	8.64087	10.1146	0.610145	0.902496	4.40723	6.93381	6.51778		MTHFD1	5.39713	7.49831	5.32228	2.1842	2.29576	4.34359	6.08506	6.78641		MICB	0.058688	0.115639	0.211991	0	0.174288	0.065359	0.404642	0.286597		MICB	0.047544	0.092349	0.156655	0.181661	0	0.208824	0.308722	0.115387		MC5R	3.79128	2.5267	0.36379	0	0	0	0	0.174929
MYB	0.578163	0.419444	0	0.034972	0.015656	0.130304	0.287715	0		MTHFR	3.21648	1.87741	4.3776	0.658661	0.628158	2.12907	3.28507	2.25378		MTHFD1	6.39458	7.9885	5.61053	1.50395	2.75392	5.69926	4.62179	7.267		MTHFD1	7.45145	7.28219	4.42474	0.765058	2.34957	5.33613	5.72063	7.65964		MCHR1	0.950163	0.512685	1.47575	0	1.07602	3.78696	8.09784	3.82194
MYLIP	8.46899	7.45648	9.42187	0.279884	0.595993	6.81818	7.44226	3.38323		MTR	2.22989	0.368769	1.03194	0.22219	0.177539	0.578968	1.10893	1.22338		MTHFR	2.36837	2.80118	2.3517	0.283528	0.931533	2.13275	2.48943	3.32565		MTHFR	3.34526	1.03869	2.79057	0.130942	0.314432	1.70059	2.97008	3.12162		MCHR2	0.633123	0.538727	5.66409	0.31167	0.796554	3.61117	6.90428	1.97292
MYO18B	0.010531	0.005979	0.05961	0	0.032246	0.029097	0	0.019237		MUTED	5.62704	7.79621	8.62232	1.1226	2.00398	3.58024	6.35571	6.17108		MTR	1.07838	0.783529	0.457997	0.135418	0.256746	0.814071	1.28732	1.55838		MTR	2.24777	0.336802	0.567357	0.02674	0.106163	0.935122	1.31292	1.83672		MCTP2	0.048408	0.016804	0.082977	0	0.002306	0.091469	0.284512	0.182602
MYO9B	12.0422	2.53698	1.85441	0.133991	0.393758	0.882085	3.74256	4.93322		MYB	0.720507	0.183757	0.152954	0	0.022847	0.065819	0.026358	0.031722		MUTED	5.55004	8.8898	6.03293	1.79536	2.53776	3.19967	5.99478	6.37492		MUTED	5.77942	5.81135	7.51203	0.560217	2.8821	4.49073	5.55644	7.20983		MED12	6.94752	3.1766	1.12561	0.071051	0.235684	0.55839	1.44993	2.99942
MYOZ1	0.093644	0.16848	0.534325	0.74013	0.384162	0.11384	0	0.330625		MYLIP	7.83664	8.06986	7.80823	0.270529	1.01428	5.78979	8.1085	5.87745		MYB	0.551457	0.249981	0.118995	0	0.018245	0.075677	0	0.066329		MYB	0.670308	0.186108	0.350787	0.020945	0	0.043431	0	0.043981		MEGF10	0.377971	0.107581	0.467681	0.057774	0.079755	0.882192	1.79215	7.59955
MYT1	2.16063	1.18574	1.045	0.088119	0.108664	0.372123	0.956462	1.39744		MYO18B	0.022171	0.012361	0.078669	0.011912	0.015615	0.056922	0.026593	0.016408		MYLIP	7.59022	5.90374	4.39671	0.662754	1.14661	5.92981	6.29513	4.90658		MYLIP	7.69014	4.95526	4.2606	0.041339	0.606174	8.04388	7.41417	6.42539		MET	1.22679	1.12479	6.39834	0.25031	0.028795	2.70953	7.29108	1.7004
NAGS	0.104993	0.115612	0.461033	0.176678	0.214654	0.142111	0.258024	0.606476		MYO9B	6.88365	1.84368	2.4693	0.620224	0.448263	0.89862	3.11173	4.95554		MYO18B	0.019283	0.011997	0.032842	0	0.006363	0.035129	0.007889	0.051463		MYO18B	0.014731	0.006368	0	0	0.054322	0.049535	0.0614	0.02305		MFRP	0	0	0.028593	0	0	0	0	0
NALCN	1.70658	2.29165	6.77901	0.162082	0.414377	3.66708	6.69115	3.2732		MYOZ1	0	0.174142	0	0.433134	0.358423	0.589777	0.312783	0.655211		MYO9B	4.51639	3.41075	1.17677	0.409667	1.2751	1.56545	3.67578	4.90771		MYO9B	7.2182	1.45283	1.59022	0.164029	0.669146	2.25393	3.88539	6.602		MICB	0.110643	0.151035	0.141737	0.081389	0	0.277341	0.172871	0.210871
NAT1	0	0	0	0.205279	0.053479	0.377377	0.22324	0.172361		MYT1	1.28356	0.851932	1.34769	0.186702	0.367682	0.360489	1.01162	0.677971		MYOZ1	0	0.186557	0.404268	0.735757	1.45968	0.131704	0.380946	0.593673		MYOZ1	0.190317	0.110194	0	0.597351	1.08605	0.193278	0.402613	0.446342		MTHFD1	6.70884	8.01031	5.39205	0.956219	1.99248	4.0935	6.25115	6.67652
NCR3	0	0	0.002919	0	0.058546	0	0	0		NAGS	0.011191	0.476369	0.199001	0.11477	0.038125	0.110209	0.276986	0.245953		MYT1	1.43086	2.17034	0.77925	0.292042	0.274854	0.635067	0.916762	0.686295		MYT1	4.47099	0.791851	0.930897	0.182434	0.184584	0.250829	0.85943	1.26314		MTHFR	4.43375	0.813796	2.69447	0.17419	0.681975	0.888855	2.73193	3.20536
NCSTN	7.34626	12.195	8.50769	0.920766	2.047	8.42659	11.7538	8.37666		NALCN	2.61758	2.369	6.98649	0.392544	0.834764	3.07717	5.79105	4.21294		NAGS	0.107579	0.058976	0.511108	0	0.314053	0.148334	0.121515	0.365942		NAGS	0.070967	0.088854	0.485158	0.034951	0.39521	0.128644	0.40125	0.190516		MTR	1.59925	0.169716	0.708274	0.057231	0.06822	0.264942	0.839625	1.61998
NDE1	0.686934	0.865115	1.63656	0.45283	0.476036	0.856938	4.16374	4.79184		NAT1	0	0.27687	0.118276	0.106729	0.211287	0.10214	0.162507	0.246134		NALCN	2.31009	2.28279	3.25958	0.155438	1.14029	3.61447	5.52719	4.81084		NALCN	2.03139	1.43999	4.12449	0.107446	0.460544	3.68498	6.81239	4.93729		MUTED	9.46815	5.32303	6.61238	0.757747	1.26992	3.61881	5.68447	6.44818
NEUROG1	0	0.196612	0	0	0	0	0.273093	0		NCR3	0	0.048111	0	0	0.085437	0.061952	0	0.100873		NAT1	0	0.053746	0.118021	0.156564	0.040834	0.01728	0.212058	0.514654		NAT1	0.197983	0	0.217447	0.193698	0	0.198149	0	0.103966		MYB	0.235636	0.240949	0.148321	0	0.025961	0.02099	0.153298	0.015682
NFKBIL1	12.2036	12.6841	9.73386	2.02984	7.37433	10.4988	4.8795	6.63626		NCSTN	7.66563	13.6363	8.00496	2.99061	2.15397	7.82185	10.5759	9.46083		NCR3	0	0	0.014511	0	0.137391	0	0.223642	0.102085		NCR3	0	0	0	0	0	0	0	0		MYLIP	14.4108	5.0915	4.78226	0	0.571356	5.25162	7.34461	4.58814
NGFR	1.48734	4.74769	0.602431	0	0	0.091301	0.151082	0		NDE1	0.598693	0.524952	1.5723	0.471796	0.49063	1.32407	3.68528	4.56346		NCSTN	7.91069	12.8664	9.01335	2.72448	3.98525	9.47166	9.7268	9.78981		NCSTN	8.8125	11.9248	7.22076	0.739111	4.06637	10.6339	11.1687	11.519		MYO18B	0.021426	0.00595	0.017654	0	0.010836	0.048437	0.026872	0.005469
NOS1	0.389515	0.346418	0.530032	0.02112	0.017645	0.292659	0.640139	0.916462		NEUROG1	0	0.06774	0	0	0	0	0	0		NDE1	0.72114	1.3322	0.793885	0.375712	1.90327	2.17839	3.23084	5.72541		NDE1	2.06319	1.00178	0.938064	0.101099	1.04466	3.15964	3.41125	6.70272		MYO9B	8.96936	1.88162	1.44606	0.145366	0.482607	0.516083	2.55628	6.35914
NOS1AP	2.49206	2.059	4.18457	0.036479	0.298651	2.61001	4.6946	2.60849		NFKBIL1	6.80998	17.0141	8.05791	3.52554	4.09498	11.6317	6.89556	8.42244		NEUROG1	0	0.516217	0	0	0	0	0	0		NEUROG1	1.00697	0.424538	0	0	0	0	0	0		MYOZ1	0.07415	0.42575	0.330563	0.657532	0.950149	0.595155	0.232497	0.207186
NOS3	0.946394	2.01172	1.14007	0.469842	0.334304	0.606092	0.983924	1.31414		NGFR	1.20204	4.44184	0.320182	0.142509	0	0.034562	0.381955	0.13281		NFKBIL1	8.11723	14.4833	7.16795	2.67239	9.28257	7.4975	5.72023	6.9005		NFKBIL1	9.24878	15.0848	8.10219	1.67959	11.0705	8.78514	8.61015	8.0192		MYT1	1.49021	0.719114	0.986878	0.086863	0.174475	0.265884	0.554266	1.07975
NOTCH1	1.72618	2.52582	1.90632	0.122634	0.178112	0.93815	2.50132	5.40898		NOS1	0.390845	0.030658	0.832443	0.020626	0.053891	0.255273	0.698765	0.658732		NGFR	0.044832	2.43164	0.11927	0.173064	0.132961	0	0.159675	0.219806		NGFR	1.3761	2.12277	0.644327	0.087392	0.162471	0	0.192034	0		NAGS	0.248849	0.293273	0.370625	0	0.21164	0.083499	0.11664	0.286425
NOTCH2	1.45995	1.66952	2.05344	0.101182	0.115106	0.589923	1.12247	8.16668		NOS1AP	2.11508	2.04146	5.73499	0.133186	0.546497	2.21559	4.81775	2.5434		NOS1	0.226455	0.333079	0.290034	0.033282	0.129389	0.302227	0.860606	0.987605		NOS1	0.498084	0.099694	0.292455	0.029002	0.078807	0.327692	0.550604	0.881468		NALCN	0.987233	0.454994	4.12655	0.364665	0.41319	2.07137	5.71717	4.30539
NOTCH3	2.96375	6.60076	8.20432	0.422153	0.431726	4.76801	5.59736	9.77624		NOS3	0.520937	2.05602	0.965431	0.493507	0.382194	0.694765	1.01793	1.33553		NOS1AP	1.60057	2.5114	2.80859	0.097178	0.969706	2.07466	3.29966	3.16201		NOS1AP	2.33811	1.47802	3.17469	0.068967	0.506141	2.43504	5.03284	2.55821		NAT1	0	0.053312	0.126701	0.343562	0.238776	0.206535	0.181191	0.211248
NOTCH4	1.16665	1.99373	0.805771	0.842606	0.705007	0.634224	1.72079	2.06755		NOTCH1	1.3243	2.51818	1.68995	0.404329	0.210499	1.13718	1.92616	3.91003		NOS3	0.602056	1.86745	0.692442	0.601431	0.803906	0.410676	0.734662	1.20317		NOS3	0.717049	1.52034	1.04991	0.237014	0.68555	0.478517	1.14662	1.08118		NCR3	0	0.062924	0.141289	0.137047	0.42414	0	0.033663	0.118894
NPAS2	2.08151	2.7376	7.62324	0.526844	1.00555	7.37822	12.7954	7.75849		NOTCH2	1.40884	1.11119	1.8211	0.275582	0.165551	0.72834	1.38297	5.56169		NOTCH1	1.00018	4.19484	0.95331	0.198575	0.548165	0.864651	1.99391	3.99162		NOTCH1	2.64086	1.42206	2.67011	0.117661	0.237738	1.95527	2.44778	5.55311		NCSTN	8.19608	10.5614	7.42969	1.10701	2.29767	5.87823	10.3964	12.0823
NPAS3	4.99108	4.50718	4.78267	0.324679	0.222606	1.38704	2.64932	8.3734		NOTCH3	2.04668	6.5091	6.07121	1.79241	0.19089	5.76558	3.81196	6.68146		NOTCH2	0.949509	2.85818	0.907206	0.248237	0.229781	0.640682	2.1556	7.93518		NOTCH2	3.96621	0.821091	1.85341	0.03403	0.029687	0.683937	1.33904	6.97171		NDE1	0.718157	0.488935	1.04894	0.24885	0.778699	1.08704	2.12687	6.35152
NPSR1	0	0.004543	0	0	0.009413	0.09953	0.249887	0.128623		NOTCH4	0.75896	1.78218	0.856825	1.2176	0.532986	0.915521	1.43706	1.35414		NOTCH3	1.60031	7.14418	3.53471	0.845743	2.18969	3.24017	3.3558	7.90356		NOTCH3	3.16226	3.54534	7.78725	0.412676	0.838516	4.27507	5.92389	7.99155		NEUROG1	0	0	0	0	0	0	0	0
NQO1	1.23243	3.73395	4.85909	8.08297	19.7976	8.38824	5.02037	19.4395		NPAS2	2.30777	2.35788	9.30811	1.10678	1.34223	6.9591	13.7672	8.18219		NOTCH4	0.54888	1.70217	0.559156	0.864406	1.32413	0.612013	1.13627	1.27632		NOTCH4	0.975727	1.8111	1.49948	0.577241	1.75264	0.726401	1.61693	1.18098		NFKBIL1	19.5265	19.0114	7.09944	1.5395	5.93672	9.98198	4.68616	6.61377
NR2E1	1.302	1.95958	2.81223	0.769218	0.262415	1.74453	0.555411	8.03072		NPAS3	3.24917	4.0217	3.39119	0.930058	0.657694	1.33966	2.58688	5.08023		NPAS2	2.1602	2.70753	7.18056	0.686439	2.41905	7.05975	9.63182	8.26535		NPAS2	2.18812	2.39668	10.8598	0.494883	2.27252	6.16504	12.4539	8.43594		NGFR	5.88509	3.32957	0.244991	0	0.032852	0.065022	0.122072	0.066329
NR3C1	0.484351	1.52767	3.8353	0.990549	0.671836	6.74127	10.9861	5.41702		NPSR1	0	0	0	0.066975	0	0.106103	0.152275	0		NPAS3	2.48733	6.25596	2.68405	0.496193	0.398156	1.64521	2.6229	5.82899		NPAS3	4.96047	3.14092	5.75691	0.096827	0.218972	1.65604	2.92777	6.40931		NOS1	0.496937	0	0.219609	0.044263	0	0.239989	0.395113	0.871398
NR3C2	0.66674	0.937376	2.03626	0	0.049504	2.46306	5.7733	3.55506		NQO1	2.46313	5.34244	4.96328	12.1299	13.4617	11.9619	8.89611	15.838		NPSR1	0.010111	0.075658	0	0	0.031426	0.141744	0.137267	0.09645		NPSR1	0.074431	0.069158	0	0	0	0.030666	0.136877	0.041878		NOS1AP	2.37354	0.895795	3.34707	0.155848	0.144085	0.995244	3.91981	2.46522
NR4A2	11.5749	12.5733	10.4413	0	0.718591	5.13273	11.9935	3.88164		NR2E1	1.16804	1.799	3.36639	3.15457	0.859554	2.45525	2.59345	5.56476		NR2E1	1.46532	3.30212	2.19316	1.40338	0.541081	2.01011	3.00247	5.77266		NR2E1	3.09992	1.71532	1.27872	1.60812	0.317042	1.61251	1.84153	5.91868		NOS3	1.21042	1.95253	0.520166	0.310216	0.409071	0.753222	0.485183	1.09215
NR4A3	1.71845	4.1819	3.77568	0.045566	0.120192	2.26542	3.29299	2.43758		NR3C1	0.935756	1.12479	5.3282	0.708466	0.770747	5.07849	12.7035	6.21705		NR3C1	0.43777	1.34959	1.57527	1.16046	2.5928	4.47294	10.9057	7.64951		NR3C1	0.81996	0.663144	3.14362	0.441933	0.441872	6.92757	10.2262	8.11015		NOTCH1	2.42904	1.31913	0.891458	0.077735	0.136995	0.750954	1.1035	4.9843
NRG1	2.70536	3.09274	4.65282	0.155485	0.969176	2.01184	1.74396	0.544444		NR3C2	0.817151	0.290795	1.89616	0.187673	0.236808	2.36559	4.68275	3.53944		NR3C2	0.740878	1.12239	0.782211	0.149378	1.11791	2.13408	3.82291	5.11208		NR3C2	0.899611	0.412781	1.42955	0.056511	0.213961	2.43448	4.32483	4.44357		NOTCH2	1.0435	0.423888	1.1401	0.081313	0.055951	0.773511	1.11469	8.39065
NRG2	2.37528	1.80521	1.73191	0.334302	0.389907	0.7293	1.75587	1.37998		NR4A2	12.3664	13.065	13.1225	0.358025	1.16516	5.58528	12.8425	5.64058		NR4A2	7.34656	10.9013	7.35821	0.215494	3.04179	4.54733	9.10524	6.2417		NR4A2	10.2957	10.0053	10.0656	0.18619	1.72977	5.0824	9.75984	3.99882		NOTCH3	4.54913	4.13917	3.33668	0.460488	0.42966	4.47033	2.3304	7.66083
NRG3	6.32299	4.92346	10.5367	0.301721	0.567569	6.10192	11.6281	5.77562		NR4A3	2.78308	3.07787	4.21574	0.088399	0.213095	1.87123	3.52837	1.91409		NR4A3	3.08859	6.13775	1.90716	0.107347	0.574372	1.82518	4.05681	1.85382		NR4A3	2.04585	1.68226	2.62312	0.049112	0.202934	2.54216	3.42051	1.9082		NOTCH4	1.51378	1.59306	0.680285	0.522288	1.04038	0.72347	0.871692	1.10972
NRG4	0.200784	0	0.232271	0	0	0.094381	0.303915	0.674614		NRG1	2.74375	2.60616	4.32	0.459375	0.959968	1.81798	1.68366	1.06871		NRG1	2.05486	2.43907	3.45148	0.1235	0.882784	1.82395	1.79293	1.12554		NRG1	3.63254	2.45836	3.0185	0.085962	1.6605	1.8748	1.68734	0.873934		NPAS2	5.22524	4.51265	7.20358	0.601236	1.63031	6.27108	10.147	7.48983
NTF3	3.66753	3.01931	1.42968	0.194848	0.155306	0.14471	0	0.184884		NRG2	1.51438	2.01515	2.05764	0.392144	0.304507	0.828021	0.845635	1.42151		NRG2	1.17366	2.15708	1.29006	0.122095	0.993321	0.697344	0.912022	1.48725		NRG2	1.54649	1.33514	2.28256	0.376807	1.67704	0.328041	1.35418	1.09801		NPAS3	6.44509	3.05882	2.92352	0.149926	0.41199	1.67823	1.97306	7.14101
NTNG1	0.418615	1.19866	7.93609	0.319778	0.676515	5.66167	6.2468	2.06622		NRG3	7.24826	5.48244	13.4414	0.647507	0.701709	4.69646	10.0784	5.1347		NRG3	6.9906	5.95609	6.71905	0.716661	1.57666	5.15738	8.13513	5.94098		NRG3	4.97872	3.8363	8.88879	0.192597	0.659595	4.72329	9.57869	5.57439		NPSR1	0	0	0.066174	0	0.03005	0.059881	0.225354	0.050698
NTRK3	4.94182	4.36399	7.71907	0.624704	0.514732	5.0065	8.72702	4.94858		NRG4	0	0	0.597111	0.242164	0.145819	0.020278	0.937937	0.445379		NRG4	0.088304	0.03506	0	0	0.150383	0.094556	0.81395	0.526939		NRG4	0	0	0	0.428507	0	0.110993	0.530718	0.330255		NR2E1	1.12823	1.00949	2.54367	0.893101	0.608246	2.90459	2.14468	5.87169
NTS	0	0	0	0	0.080677	0	0	0		NTF3	0.444482	1.7153	1.54473	0.830781	0.075546	0	0.174314	0.154843		NTF3	16.4948	17.8915	1.4456	0.414251	1.14461	0.127104	0.075822	0.276024		NTF3	1.81374	3.03086	1.16623	0.277029	0	0.15941	0.753678	0.167281		NR3C1	0.791608	0.508134	4.48604	0.789492	0.923915	5.43575	14.4719	6.45735
NTSR1	6.87499	13.6566	4.89724	0	0.06683	1.31021	1.03391	1.07081		NTNG1	0.94466	1.51337	8.49315	0.882736	1.99212	3.76348	6.41187	2.95156		NTNG1	0.41823	1.03251	5.21317	0.626946	1.51196	3.70623	4.77534	3.74209		NTNG1	1.12427	1.96461	5.08729	0.20935	1.66154	3.93717	6.84091	3.36658		NR3C2	1.78303	0.584423	1.90342	0.150577	0.06248	1.74212	4.48706	4.06357
NUP153	7.75937	11.3923	5.0599	0.124921	0.301854	4.24489	5.74936	3.2734		NTRK3	5.31061	3.47932	7.82518	0.83882	0.808707	3.40265	6.56418	4.77815		NTRK3	4.56196	5.37932	3.09617	0.838909	1.47976	4.12574	5.87435	6.35459		NTRK3	4.107	2.84567	4.59841	0.528445	1.3566	3.27719	7.34749	6.05418		NR4A3	2.18062	1.8945	2.16756	0.005807	0.122258	1.02056	3.70519	1.51226
OGG1	9.94881	16.9876	8.98536	4.65041	14.0471	7.21818	8.37197	5.94128		NTS	0	0.092566	0	0.090429	2.66754	0	0.007443	0.165707		NTS	0	0.292921	0.297287	0.21814	0.096612	0.07739	0.119781	0		NTS	0	0	0	0.138981	0.40681	0	0.242052	0.088088		NRG1	4.65597	4.02592	4.44369	0.281023	0.601928	1.41602	1.67267	0.95642
OPRM1	0.005595	0.053784	0.357465	0.049813	0.007797	0.1152	0.655612	0.382873		NTSR1	3.75832	11.1738	4.79282	0	0.092913	1.29682	0.375555	0.405312		NTSR1	2.83124	15.061	3.06152	0.089129	0.296591	1.19345	0.580676	0.859526		NTSR1	5.08111	9.42283	4.6346	0	0.375694	0.763363	0.968942	0.71448		NRG2	2.63998	1.28392	1.11363	0.28867	0.404823	0.477946	0.773333	1.11193
OXT	0	0	0	0.180356	0.43581	0	0.514398	0		NUP153	9.67917	10.0835	6.06245	0.463927	0.564634	3.60769	5.68748	3.66914		NUP153	7.90369	10.5319	3.72753	0.440776	0.815592	3.45361	5.15869	4.36893		NUP153	10.1134	8.66737	4.29706	0.157481	0.299622	4.75146	6.58184	3.90841		NRG3	6.07993	3.13344	7.6448	0.408659	0.566946	3.5951	7.84416	4.56612
OXTR	0.215791	0.039917	0.265297	0.146347	0.006803	0.009961	0.492254	2.13806		OGG1	7.72602	17.711	9.37777	5.68482	6.83223	6.82786	10.0145	5.13976		OGG1	7.42606	17.3488	8.10789	4.4237	16.2392	5.67959	7.6213	4.61067		OPRM1	0.016373	0	0.357564	0.023469	0	0.165202	0.660974	0.179957		NRG4	0	0.01512	0.122223	0.227363	0.308395	0	0.60297	0.428079
P2RX7	0.341448	0.175008	1.42452	0.065983	0.251822	1.60047	5.29067	4.08813		OPRM1	0.036459	0.041534	0.34667	0.053574	0.047544	0.230424	0.911367	0.236593		OPRM1	0.038985	0.022948	0.144021	0.018568	0.05329	0.101712	0.822205	0.210532		OXT	0.304132	0	0	0	0.560753	0	0	0		NTF3	0.378452	0.906467	2.06646	0.368526	0.208278	0	0.194356	0.145619
PADI4	0	0.240063	0	0	0.036044	0.446949	0	0		OXT	0	0	0	0	0	0.117677	0.187226	0.11343		OXT	0	0	0	0	0.497085	0	0.160676	0.084935		OXTR	0.049171	0	0.162016	0.109866	0.362642	0.258365	0.36387	0.731191		NTNG1	3.26867	2.30023	5.24521	0.292079	0.505775	1.5252	5.62302	2.54649
PAH	0	0.129431	0.896971	0.069531	0.272202	1.8887	1.89824	0.869879		OXTR	0.247797	0.082516	0.352501	0.159043	0.209901	0.038051	0.242161	0.405935		OXTR	0.098047	0.401537	0.131903	0	0.084385	0.067595	0.707443	0.26013		P2RX7	0.296112	0.305473	0.967379	0.100945	0.295409	4.3752	5.92261	6.57877		NTRK3	4.64146	2.11877	3.35121	0.774003	0.778404	2.86817	5.71103	4.90183
PAICS	3.4759	6.75044	5.21625	2.80015	2.25178	6.22393	7.17661	7.83531		P2RX7	0.395258	0.154847	2.09573	0.262505	0.629784	1.43168	4.0713	4.1		P2RX7	0.279128	0.487438	0.611313	0.130084	0.636642	1.92204	5.3792	4.49971		PADI4	0	0.216279	0	0	0.092118	0.259225	0.048955	0.019411		NTS	0.34641	4.29236	2.95647	0.243888	0.245661	0.244768	0.322251	0.08304
PALB2	2.59295	2.53113	1.31445	0.462151	0.289834	1.10143	1.27076	0.883415		PADI4	0	0.171368	0.044166	0.006551	0.052959	0.396819	0.030757	0.056405		PADI4	0	0.181453	0.022036	0	0.062119	0.260245	0	0.036593		PAH	0.114047	0	0.272954	0	0.583757	1.06221	2.26709	0.86214		NUP153	6.08021	6.33008	4.44172	0.284964	0.331917	2.3749	6.03824	4.2065
PAWR	1.00906	1.35272	1.81364	0.403697	0.249701	0.607714	0.860501	1.30701		PAH	0.041747	0	0.448454	0.202795	0.931303	1.85337	2.16424	0.60142		PAH	0.041577	0	0.254186	0.118426	0.324503	2.09717	2.11432	0.994705		PAICS	8.7919	7.44438	4.44271	2.93044	1.71731	7.22761	6.74829	11.7546		OGG1	13.7344	17.9658	9.26812	3.65263	11.7449	8.2635	8.11884	5.45067
PAX3	0	0.02847	0	0	0	0	0	0		PAICS	6.00967	6.1833	5.705	3.65037	4.20641	5.06015	9.07968	10.8842		PAICS	8.73975	9.86941	7.21163	4.42259	3.74994	7.58324	9.20608	11.0929		PALB2	3.36419	3.10731	0.927436	0.181956	0.497317	1.05739	1.35171	1.23862		OPRM1	0.032786	0.025838	0.312145	0.050878	0.044812	0.162691	0.633178	0.248248
PAX6	5.46742	2.113	2.07813	2.94555	1.34828	1.30252	1.32567	11.4849		PALB2	3.25177	2.79944	1.69856	0.28565	0.53392	1.29766	1.25338	1.275		PALB2	3.44765	2.55028	1.21545	0.40224	0.588755	1.40325	1.2954	1.35334		PAWR	1.26736	0.672164	1.64141	0.422199	0.332224	0.780264	0.468661	0.827734		OXT	0.105208	0	0	0.014264	0.110341	0	0.099675	0.061036
PCDH11X	3.40924	6.22535	3.48093	0.134858	0.089333	0.973486	2.01956	0.635206		PAWR	2.01068	0.765476	2.64588	0.410172	0.496897	0.666138	1.43735	0.713253		PAWR	1.108	1.74862	1.3228	0.462236	0.788141	0.533353	1.0477	1.02495		PAX3	0.019431	0	0.009369	0	0	0	0	0		OXTR	0.398954	0.078907	0.303729	0	0.072336	0.072073	0.142299	0.255585
PCDH11Y	0	4.82344	5.62663	0	0.153375	0	2.78462	0.915403		PAX3	0	0.029029	0	0	0	0	0	0		PAX3	0	0	0	0	0	0	0	0		PAX6	14.5223	2.25768	2.94486	3.52625	2.11593	1.26097	2.25606	5.78544		P2RX7	0.189844	0.095547	0.921572	0.03348	0.418028	0.671638	3.12491	5.87165
PCK1	0	0.124097	0.082702	0	0	0	0	0.23912		PAX6	3.09684	1.33004	2.29368	5.39383	1.83522	1.39911	1.96604	5.9429		PAX6	4.60073	4.75458	3.3034	4.52503	2.62412	1.86278	2.93829	5.38115		PCDH11X	5.17089	2.40149	2.09165	0.225745	0.050051	1.1397	1.54352	0.69464		PADI4	0	0.158442	0	0	0.033273	0.688033	0.021317	0.035094
PCK2	0.823153	1.44979	1.88479	0.793833	1.75144	3.05782	1.06067	2.57133		PCDH11X	5.03371	3.52908	3.2228	0.219506	0.05794	1.16942	1.7768	0.575308		PCDH11X	1.80778	3.56234	1.12197	0.264756	0.562838	0.661808	1.74277	0.961208		PCDH11Y	0.070099	1.4823	4.11128	0	0.103397	0	3.62541	1.34996		PAH	0	0.015126	0.476155	0.144739	0.719099	2.82186	2.15447	1.08913
PCM1	11.9489	9.74265	7.80359	1.09209	0.913976	3.99072	9.81176	8.47529		PCDH11Y	0.070652	2.9134	6.63236	0	0.338462	0.021698	3.54651	0.762987		PCDH11Y	0	2.98515	1.60903	0	0.702163	0	2.64472	1.37434		PCK1	0	0	0	0.059986	0.11152	0	0.185613	0.21472		PAICS	5.36624	9.60989	9.4928	3.85907	4.63078	4.35546	11.2724	11.1388
PCNT	6.46019	1.99838	3.80432	0.169806	0.249606	2.197	4.28084	4.05907		PCK1	0.030899	0.077169	0.041579	0	0.012821	0	0.07549	0.469401		PCK1	0	0.124498	0	0.059799	0.422323	0	0.140219	0.332765		PCK2	0.918735	1.19636	2.17911	0.755819	2.44303	1.87511	1.2008	2.31893		PALB2	2.16859	2.21143	1.46513	0.342741	0.352638	0.862765	1.83545	1.47696
PDE4B	6.92096	9.37692	10.3156	0.515562	0.573254	7.63067	11.7309	8.62953		PCK2	0.704576	1.33097	2.0527	1.59719	1.40214	2.04745	1.29127	2.17387		PCK2	0.625618	1.19253	1.84565	0.827013	2.20996	1.81737	1.21193	2.29103		PCM1	18.0841	6.01208	4.01489	1.1686	0.746432	4.92762	10.2779	9.49662		PAWR	0.454558	0.458083	2.25742	0.256187	0.364198	1.73669	0.958244	0.622893
PDE4D	5.78547	6.48713	4.103	0.186893	0.114953	1.72695	3.59539	2.14317		PCM1	17.1529	7.56162	10.2811	1.53944	1.36197	3.72007	10.2209	8.60304		PCM1	16.3367	10.5192	4.78209	1.37733	2.05713	4.96495	10.7134	9.64407		PCNT	5.13894	1.11548	1.89104	0.137434	0.176838	1.75574	3.75072	4.0281		PAX3	0.040808	0	0	0	0	0	0	0
PDE7B	0.046744	0.358384	1.8624	0.066202	0.263123	2.14971	3.88687	2.11742		PCNT	5.71385	1.69893	4.47489	0.165336	0.421602	1.98672	3.37279	3.42385		PCNT	4.14238	2.6088	2.66384	0.230549	1.00083	2.42687	2.90607	4.22566		PDE4B	9.663	5.82634	5.71651	0.518508	1.06943	12.699	11.5111	12.062		PAX6	2.08399	0.921397	3.24501	3.29677	2.51302	2.59905	1.60217	6.07154
PDGFB	1.71217	1.78804	8.55843	0.271708	0.67058	4.14877	7.94603	5.8665		PDE4B	9.47798	8.33388	10.7152	1.39831	1.83211	8.04562	12.7707	10.015		PDE4B	6.64633	7.48018	5.27615	1.1131	2.15812	8.27311	12.0557	10.6463		PDE4D	6.70789	1.95373	1.15421	0.072531	0.276199	1.60922	2.89882	1.60499		PCDH11X	6.36502	1.1812	2.52715	0.211978	0.029951	0.857346	2.16439	0.884599
PDGFRA	4.97253	8.60335	17.5163	0.057882	0.314167	2.45917	9.7123	12.8398		PDE4D	6.84689	3.09787	3.78056	0.169749	0.159323	1.46777	3.55009	1.1307		PDE4D	3.62695	4.86108	0.819407	0.210705	0.539449	1.09677	2.5451	1.8755		PDE7B	0.38903	0.082885	1.80306	0.153926	0.873424	1.7521	4.80844	2.68952		PCDH11Y	0.097878	0.874666	5.2642	0	0.144233	0	3.44295	1.04315
PDGFRB	2.80235	5.96988	5.60385	0.367409	0.212086	2.4839	4.30329	10.4747		PDE7B	0.415066	0.290355	1.63174	0.36359	0.492243	2.27502	4.57916	1.59266		PDE7B	0.177343	0.488724	1.17389	0.185311	0.539971	0.835916	2.02496	2.61882		PDGFB	1.95439	1.82485	10.9049	0.223517	1.1986	2.64017	6.83077	3.33903		PCK1	0	0.148256	0.027052	0.046729	0.085323	0.022468	0.087581	0.263633
PDLIM2	1.76668	4.45913	2.47019	2.05205	4.03734	2.46319	1.54754	2.47415		PDGFB	1.40253	3.70322	8.69343	1.68113	0.568531	6.00945	5.91852	3.04346		PDGFB	2.06393	4.19654	4.86478	0.184335	2.19352	3.72041	4.20223	2.62308		PDGFRA	6.35138	3.99097	7.70079	0.292985	0.384937	2.73469	9.22583	10.539		PCK2	1.58786	1.7591	1.79661	0.930005	2.73708	2.83455	1.4341	2.12834
PDLIM5	0.446214	0.947256	2.1199	0.177779	0.210425	1.45584	2.24439	6.8108		PDGFRA	7.61578	5.92357	17.4439	0.502644	0.728152	2.37427	7.94031	6.15967		PDGFRA	5.92164	9.41607	4.89811	0.701161	0.938756	3.00577	12.0413	7.7154		PDGFRB	3.37732	2.60942	4.21	0.362915	0.17152	2.69712	3.72097	7.28987		PCM1	8.96551	5.03949	8.24291	1.20129	1.18268	2.59254	9.69999	8.05143
PDYN	0.989054	2.00645	1.92817	0.249181	1.51606	3.19173	4.5192	1.57997		PDGFRB	2.43451	4.6734	5.00545	1.58157	0.217418	2.08713	2.71965	7.00065		PDGFRB	1.98008	5.36374	3.83491	1.02207	1.06326	2.07244	3.37829	7.84969		PDLIM2	1.36541	3.77193	2.08437	2.1058	5.23733	1.94083	1.99181	2.69366		PCNT	4.36225	1.50399	3.16719	0.163225	0.260924	0.798572	2.1237	3.53181
PEBP4	0.217656	0.607628	1.90942	1.33687	4.81235	2.94543	2.80736	2.94122		PDLIM2	1.18091	4.30449	1.23396	4.09056	2.10939	3.06104	2.15043	3.21627		PDLIM2	1.33598	4.24213	1.38285	1.9384	5.48031	2.06647	1.80523	3.47826		PDLIM5	1.12256	0.281725	2.65298	0.267466	0.357904	1.95488	2.23653	5.94279		PDE4B	4.39807	3.19375	7.26664	0.624631	1.40308	5.96888	13.696	11.102
PER1	5.03269	7.20387	10.998	1.17834	1.74622	10.4907	6.62811	6.44492		PDLIM5	0.849275	0.439661	1.7501	0.476953	0.60649	1.52293	2.38536	3.57424		PDLIM5	0.495265	1.17398	0.935676	0.530834	0.758149	2.29855	3.26914	5.00988		PDYN	0.845907	1.76079	3.97981	0.095492	3.90291	2.10102	7.36991	0.643089		PDE4D	4.0004	0.812718	2.4158	0.229446	0.11637	1.38109	2.90371	1.14697
PER2	1.72769	1.25632	4.89537	0.035325	0.053701	2.52155	3.95632	1.99498		PDYN	0.226469	0	1.73835	0.121676	0.760612	1.81512	3.64148	0.638567		PDYN	0.226564	0.856177	1.78007	0.146759	2.39089	2.3507	5.6704	0.677914		PEBP4	0.366337	0.26855	0.242157	0.921464	7.65921	3.00954	1.18938	3.96415		PDE7B	0.037014	0.231968	1.53968	0.054455	0.554282	1.89497	5.02539	2.14024
PER3	0.700433	0.723642	4.73894	0.235989	0.210143	3.34059	3.84571	3.91303		PEBP4	0.329345	0.706792	1.19761	1.16297	2.12008	2.2198	2.06866	4.02805		PEBP4	0.149812	0.539607	0.854312	0	6.05912	3.11885	2.44512	3.41237		PER1	4.17115	5.22647	11.4294	0.932393	3.53579	8.14798	6.55106	5.82713		PDGFB	2.13391	2.57709	5.9738	0.360412	0.874603	2.30071	4.89068	3.1554
PGBD1	9.67672	7.13408	1.51585	1.39047	0.91384	1.68536	2.12973	1.72605		PER1	3.37479	7.92415	10.6158	2.59511	1.57011	8.60698	6.06813	6.0785		PER1	3.2103	6.79284	6.41596	1.5797	3.38243	6.75766	4.05954	6.23257		PER2	1.5521	0.802135	3.29405	0.138065	0.055215	2.00632	3.98855	1.87871		PDGFRA	4.59253	1.9857	8.42871	0.140163	0.380788	4.07495	6.63683	8.88937
PHF21B	1.938	1.47302	0.737611	0.013457	0.077256	0.151461	0.59505	0.675411		PER2	1.19762	1.26946	4.20914	0.130366	0.341482	2.2622	3.39617	2.2387		PER2	0.835708	2.09812	1.85023	0.123632	0.459839	1.9198	2.41821	2.35394		PER3	1.35424	0.621137	3.67302	0.14962	0.592956	4.3615	3.66779	4.58355		PDGFRB	2.98616	2.19041	4.0907	0.436264	0.362657	1.91765	2.25334	7.23359
PHOX2B	0	0.049378	0	0	0	0	0	0		PER3	0.772187	0.894127	5.0772	0.490176	0.501649	3.51051	3.64139	3.28228		PER3	0.75067	0.830085	2.15579	0.461776	0.576799	3.97418	4.00528	4.11875		PGBD1	9.72128	6.66184	1.99872	1.78792	1.42219	1.65166	2.41585	1.79608		PDLIM2	2.39276	3.43375	1.10713	1.17525	3.63842	3.20255	1.51124	2.58108
PI4K2B	0.619822	0.863623	0.9403	0.065511	0.05747	0.591591	0.667298	1.19239		PGBD1	10.8748	6.52677	2.79	1.79527	1.20853	1.66941	2.78146	2.37099		PGBD1	10.0378	6.9569	2.86935	1.81972	1.90535	1.59275	2.81811	2.54803		PHF21B	1.99761	0.602447	0.612683	0.005612	0.259117	0.139936	0.515248	0.676995		PDLIM5	0.313018	0.278326	1.45873	0.275112	0.383123	2.33864	2.0764	5.38928
PIK3C2A	1.79066	1.39111	1.16343	0.155925	0.068077	1.10331	2.03962	3.98054		PHF21B	1.10474	1.04804	0.461762	0.339375	0.104067	0.270775	0.261899	0.467808		PHF21B	0.759553	1.51359	0.440679	0.068067	0.217218	0.318557	0.162303	0.328043		PHOX2B	0	0	0	0	0	0	0	0		PDYN	0.411693	0.182335	5.48623	0	2.27495	2.74133	7.37221	1.0109
PIK3C2B	8.07496	8.30724	4.16912	0.226093	0.201308	1.41046	3.8029	3.27813		PHOX2B	0	0	0	0	0	0	0	0		PHOX2B	0	0	0	0	0	0.042093	0	0		PI4K2B	1.16489	0.357028	0.391045	0.076885	0.143909	0.519664	0.79262	0.83209		PEBP4	0.280227	0.762676	0.659501	1.34598	5.07484	2.11387	1.93916	3.156
PIK3C2G	0.115319	0.010522	0.104415	0	0.100627	0.161391	0.387383	0.170181		PI4K2B	1.80289	0.395635	0.864219	0.380413	0.269857	0.371089	1.03931	1.14327		PI4K2B	1.10812	0.666571	0.385767	0.289899	0.092831	0.661479	1.27633	1.02517		PIK3C2A	2.77302	0.60803	0.789947	0.114815	0.0861	1.76833	2.2111	4.57329		PER1	8.67341	8.07334	7.44005	0.592129	1.34851	3.89269	5.8472	5.54582
PIK3C3	3.48374	3.11232	2.37514	0.685716	0.939299	1.83504	4.76485	3.16678		PIK3C2A	2.73248	0.805809	1.4597	0.177205	0.250645	1.2374	2.34509	3.06201		PIK3C2A	1.28506	1.67474	0.682017	0.280117	0.51668	1.06273	3.58787	4.30507		PIK3C2B	7.75238	3.80243	3.28443	0.037897	0.28948	2.64713	4.48405	4.05862		PER2	1.46088	0.511673	2.67064	0.026339	0.177879	1.14607	3.24658	2.3317
PIK3CB	3.84108	5.31287	9.60085	0.14288	0.441685	9.2064	13.7071	4.17547		PIK3C2B	7.16461	6.96626	4.70646	0.363005	0.34674	1.5218	3.26008	3.5046		PIK3C2B	5.05286	8.27012	2.48486	0.173813	0.651342	1.92431	3.65232	3.58231		PIK3C2G	0.013139	0.080139	0.043291	0.051417	0.048449	0.254017	0.39121	0.139433		PER3	1.33916	0.467872	3.73427	0.18787	0.400825	2.14742	3.66832	3.98497
PIK3CD	3.58418	3.69931	1.99809	0.054384	0.197585	0.936233	2.99948	1.10896		PIK3C2G	0.065854	0	0.115508	0.035605	0.069539	0.154433	0.270408	0.068073		PIK3C2G	0.039564	0.076492	0.23417	0.047101	0.066416	0.249789	0.223259	0.109245		PIK3C3	4.92455	2.35037	1.64887	0.645259	1.02969	2.69208	5.16822	3.68114		PGBD1	5.66743	4.90184	3.20239	1.58617	1.45035	0.868074	2.72083	2.13862
PIK3CG	0.097071	0.38926	0.279314	0	0.026039	0.300245	0.584792	0.135208		PIK3C3	4.60372	2.09631	3.99063	0.906445	0.980279	1.78835	6.01839	2.60369		PIK3C3	3.34549	3.4977	1.71551	0.775056	1.55567	1.97073	5.34672	3.95073		PIK3CB	5.19489	4.67411	6.3811	0.1392	0.754205	8.06028	13.2833	6.75199		PHF21B	1.80321	1.08547	0.830124	0.061383	0.19514	0.025574	0.241483	0.477763
PIK3R3	4.35394	3.87469	3.96709	0.326683	0.14843	2.27909	2.6645	4.14664		PIK3CB	5.31804	4.25241	9.51713	0.47575	2.07037	7.47495	16.2219	7.50367		PIK3CB	5.68013	6.03681	6.48839	0.414896	2.65685	7.90001	13.7361	8.21958		PIK3CD	3.19046	2.20854	1.76971	0.033497	0.396805	0.817692	2.0987	1.50423		PHOX2B	0	0	0	0	0	0	0	0
PIK3R4	3.01523	2.82149	3.76911	0.253617	0.52184	3.45874	5.82656	3.89141		PIK3CD	2.56187	2.74719	1.78912	0.138995	0.312199	0.908598	2.57002	1.31849		PIK3CD	2.30077	4.29568	1.53701	0.163559	0.423163	0.818969	1.70964	1.45837		PIK3CG	0.103772	0.281267	0.399811	0.050649	0.063922	0.219617	0.355422	0.234335		PI4K2B	0.86402	0.221977	0.820361	0.136371	0.164368	0.537935	0.813142	0.930096
PIP5K1A	4.69327	7.97342	3.56069	0.567315	0.544449	4.79202	4.07722	2.47769		PIK3CG	0.162436	0.243331	0.74477	0.111378	0.055498	0.120004	0.821396	0.103267		PIK3CG	0.103929	0.252586	0.256799	0.05666	0.089651	0.163889	0.615464	0.216839		PIK3R3	5.07935	2.65458	2.61253	0.306211	0.375972	2.72205	3.99587	3.28601		PIK3C2A	0.605691	0.381921	1.57396	0.247343	0.149181	1.47654	2.43057	4.14283
PIP5K1B	0.116318	0.640814	7.93726	0.226149	1.40328	9.39581	7.71361	4.20172		PIK3R3	3.5465	2.38543	4.22827	0.341283	0.465093	1.83635	5.92566	3.40325		PIK3R3	2.92699	3.22099	2.49079	1.17941	1.32369	1.6635	3.47781	4.13086		PIK3R4	4.23437	2.85889	2.57004	0.245831	0.771208	4.21623	5.59222	4.8627		PIK3C2B	11.5507	3.13747	3.06422	0.037571	0.29467	0.743818	2.87846	4.47327
PITX3	0	0	0	0	0.046244	0	0	0		PIK3R4	3.69226	2.60659	3.93561	0.753491	0.775298	3.27429	5.59804	4.96287		PIK3R4	3.83586	3.06197	3.09816	0.568983	1.03078	3.41031	5.17348	4.64896		PIP5K1A	5.23281	5.1885	3.32125	0.32846	1.17254	4.19172	3.18614	3.81766		PIK3C2G	0.014461	0.062965	0.292664	0.055766	0.192237	0.219123	0.5367	0.101384
PIWIL2	0.29652	0.634863	0	0	0	0	0.065221	0		PIP5K1A	5.00287	7.12339	4.30587	1.02913	0.839735	4.18089	4.17823	3.19474		PIP5K1A	4.93139	6.78159	3.35667	0.539958	1.00538	3.41348	3.38848	3.91243		PIP5K1B	1.14558	0.913311	4.84081	0.156587	3.94535	7.43883	10.1244	5.41043		PIK3C3	2.20044	1.80411	3.02436	0.686998	0.638474	1.50425	5.70402	3.42967
PLA2G1B	0.285362	0	0	0.2096	0	0	0	0		PIP5K1B	0.320001	0.71271	11.0654	0.865151	3.81948	8.73455	11.3999	5.76784		PIP5K1B	0.6304	0.660239	8.22752	0.671061	2.70342	7.92682	8.35021	6.27061		PITX3	0	0	0.301273	0	0	0	0	0		PIK3CB	3.64413	3.03477	9.3839	0.120948	0.726216	8.42927	14.8042	6.51463
PLA2G4A	0.073049	0.663792	0.513608	0.417758	0.385299	1.50149	1.8829	0.370948		PITX3	0	0	0.113332	0	0	0	0	0		PITX3	0	0.024358	0.056544	0.123349	0.16389	0	0	0		PIWIL2	0.301622	0.223844	0	0	0	0.043418	0	0.07656		PIK3CD	3.95626	1.41116	1.33903	0.029101	0.309063	0.604954	2.23306	1.37064
PLA2G4C	1.47608	0.920534	2.9573	1.05882	2.91248	4.22297	4.90233	9.1378		PIWIL2	0.288565	0.308708	0.069583	0	0	0	0	0.014382		PIWIL2	0.335902	0.60895	0.017476	0	0	0.013343	0	0.030072		PLA2G1B	0.260079	0.12157	0	0	0	0	0	0		PIK3CG	0.12102	0.097265	0.379722	0	0.063752	0.132706	0.384814	0.128544
PLA2G4D	0	0	0	0	0	0	0.074786	0		PLA2G1B	0.206212	0	0	0	0	0	0	0		PLA2G1B	0	0.012709	0.060465	0.077789	0.104854	0.088791	0	0		PLA2G4A	0.122755	0.32276	1.18221	0.507191	1.09238	1.35372	1.72227	0.574031		PIK3R3	3.20866	1.23047	3.97917	0.182688	0.405321	2.29345	5.84638	3.93967
PLA2G6	4.99486	6.71348	6.25526	0.463056	1.79678	5.16346	6.57491	6.01316		PLA2G4A	0.074984	0.465629	0.671525	0.997544	0.694356	1.25115	1.98269	0.905568		PLA2G4A	0.106586	0.232444	0.494697	1.31268	0.799317	0.819305	1.24781	1.03483		PLA2G4C	1.2215	1.51382	2.76195	0.648334	5.4334	6.50951	6.04979	10.2522		PIK3R4	3.1622	1.91928	3.18137	0.293102	0.597739	3.0827	6.22969	4.88478
PLA2G7	0.31317	0.375793	0.11467	0.12921	0.841439	1.22524	0.998646	0.459278		PLA2G4C	1.09879	1.38911	3.9035	1.4528	1.93873	3.56519	6.53693	11.2489		PLA2G4C	1.28221	1.13931	3.46203	0.91202	3.41084	4.91073	5.63541	10.5173		PLA2G4D	0	0.042157	0.089579	0	0	0	0.047852	0		PIP5K1A	3.7651	4.53557	4.37366	0.432041	0.527428	3.62771	5.25725	3.54826
PLAA	8.74379	12.458	7.74255	1.92921	2.10979	5.92378	6.68675	4.90904		PLA2G4D	0	0	0	0	0	0.053868	0.02722	0.049027		PLA2G4D	0.022192	0.018005	0.039537	0	0	0.030392	0.02048	0.042403		PLA2G6	4.60765	5.13456	4.88671	0.469812	3.50984	4.42012	5.36334	6.82762		PIP5K1B	0.38967	0.392096	10.6029	0.508685	2.57046	6.96649	11.58	4.87078
PLCB3	1.19338	0.945863	0.73138	0.349491	0.274765	0.466652	0.689728	2.11731		PLA2G6	4.06222	5.80093	5.87166	1.24449	1.47602	4.29825	5.79286	6.3994		PLA2G6	3.84347	6.52252	4.64322	0.448421	2.8378	4.15057	5.00463	6.18405		PLA2G7	0.21137	0	0	0.328708	0.779439	0.875911	1.19605	0.632037		PITX3	0	0	0	0	0	0	0	0.046956
PLCE1	0.747741	0.59692	1.32301	0.065283	0.023189	0.406008	0.73925	1.01395		PLA2G7	0.221256	0.288751	0.30577	0.218474	0.604016	0.31362	1.72204	0.631099		PLA2G7	0.427845	0.314408	0.295739	0.168102	0.628808	1.1589	1.97271	0.862325		PLAA	10.5254	11.91	7.81585	1.8839	3.53899	4.88279	7.71469	6.10555		PIWIL2	0.270135	0.192025	0	0	0	0	0.017645	0.028634
PLCG1	19.0538	11.3726	6.86707	0.444693	0.579548	4.70975	8.69901	10.5026		PLAA	11.2028	12.2295	10.7692	2.83188	3.24055	4.58584	8.28883	6.53608		PLAA	12.1786	10.6653	7.28214	2.28573	2.61321	4.64296	7.32251	6.82372		PLCB3	1.21991	0.739343	0.67654	0.165704	0.400803	0.427562	1.25411	1.70248		PLA2G1B	0.147276	0	0	0	0	0	0.192003	0.012875
PLDN	6.05767	12.3543	7.83662	1.19981	0.734154	6.80661	10.8523	4.7693		PLCB3	0.773434	1.19793	0.752093	0.527008	0.389192	0.621343	0.834374	1.46865		PLCB3	0.761249	1.03444	0.685985	0.414864	0.504799	0.514923	0.703321	1.30839		PLCE1	1.79564	0.372083	0.732067	0.057749	0.11614	0.46277	0.729691	0.967358		PLA2G4A	0.116078	0.427254	0.719163	0.680719	0.568371	2.16138	1.65234	1.00995
PLUNC	0	0	0	0	0	0	0	0		PLCE1	1.02552	0.519094	1.31649	0.126125	0.197096	0.359287	0.92696	0.851339		PLCE1	0.974121	0.995636	0.738539	0.133945	0.261725	0.627172	1.08798	0.962318		PLCG1	18.7847	7.99061	4.56564	0.469598	1.43989	4.54956	7.5789	11.2389		PLA2G4C	1.59146	1.70003	3.53036	0.627099	3.57269	3.93683	4.60969	10.3961
PLXNA2	11.8234	8.21536	6.67672	0.268386	0.346521	4.14564	8.0148	4.12529		PLCG1	13.9674	9.98847	8.18137	1.11018	1.30024	4.24053	7.48199	10.008		PLCG1	13.4113	14.1442	5.32659	0.598316	1.93947	4.22478	7.25507	10.3082		PLDN	9.40301	5.92904	5.26849	2.6843	2.18179	7.01129	11.2946	4.77587		PLA2G4D	0	0.008206	0.009491	0	0	0	0	0.016416
PMCH	0.061886	0.763528	0.197767	0.087821	0.08441	0.316729	0.168842	0		PLDN	9.43379	5.83827	8.33249	2.67224	2.29421	5.64459	10.8822	4.03047		PLDN	6.9615	9.33286	4.14712	3.36487	2.35069	5.32279	11.2441	5.4554		PLUNC	0	0	0	0	0	0	0	0		PLA2G6	7.00759	5.27973	3.88584	0.288344	1.63061	2.32677	4.51706	6.68015
PNPLA8	10.5915	18.51	15.0822	3.96983	3.08077	15.8039	19.1251	15.3339		PLUNC	0	0	0	0	0	0	0	0		PLUNC	0	0	0	0	0	0	0	0		PLXNA2	16.9662	4.34917	4.37514	0.224542	0.81374	2.6908	7.08033	5.03247		PLA2G7	0.100275	0.356552	0.220431	0.297072	1.12387	0.534285	1.68929	0.597548
PNPO	0.800457	4.15701	8.42173	0.750622	2.74393	8.70195	13.4041	10.4133		PLXNA2	12.6322	7.06562	8.33359	0.400199	0.595645	3.2067	6.69779	5.22465		PLXNA2	7.71858	9.75946	3.00661	0.235779	1.44597	2.75217	4.13608	6.28092		PMCH	0.271402	0.596033	0	0.169388	0	0.163914	0.091154	0.310842		PLAA	6.59243	9.36586	7.82702	1.86936	2.29114	4.61925	8.59377	5.8581
POM121L2	0	0.014734	0	0	0	0	0	0.047403		PMCH	0.116335	0.319339	0.058705	0	0.078236	0.102598	0	0.073299		PMCH	0.198841	0.346793	0.17713	0.879297	0.588866	0.29036	0.170408	0.180025		PNPLA8	15.3533	16.0507	11.5124	5.94156	4.91507	15.8421	17.0334	17.0163		PLCB3	1.74966	1.33933	0.69662	0.279019	0.372539	0.371334	0.520358	1.43455
PON1	0	0.077501	0.19511	0.087431	0.038611	0.143906	0	0.62902		PNPO	1.51131	3.51954	10.2261	1.82073	2.01051	7.10446	12.5709	8.50489		PNPO	1.75977	4.79503	6.67316	1.40011	3.66877	7.46166	7.83759	8.542		PNPO	1.72758	2.14837	7.49356	0.639712	6.24726	6.08677	10.5942	7.0495		PLCE1	0.492115	0.266281	1.1494	0.112654	0.106612	0.40896	0.611966	1.04087
POU3F1	7.80466	16.51	4.1368	0	0.645671	2.90059	4.59539	3.01313		POM121L2	0.018293	0.060917	0.032529	0	0	0.014045	0	0		POM121L2	0	0.029563	0	0	0	0	0	0		POM121L2	0.01815	0	0	0	0	0	0	0.028593		PLCG1	17.2401	6.93394	4.89464	0.571623	0.884468	2.82846	6.12966	10.0712
PPAPDC1A	3.23971	2.97718	3.1791	0.932465	1.66594	2.31029	2.09091	3.51136		PON1	0.012392	0	0	0.238613	0.086447	0.082834	0.046305	0.15861		PON1	0.053723	0	0.04721	0.311785	0.118717	0.137139	0.057325	0.266783		PON1	0.05352	0	0	0.522914	0.392053	0.167211	0	0.083746		PLDN	4.1822	3.77323	8.69029	1.44844	1.97051	5.67031	9.23739	3.87312
PPARA	0.394304	0.381198	1.25097	0.683272	0.229714	0.862334	1.97565	3.72235		PPAPDC1A	5.53395	7.7858	2.41283	1.13164	1.8987	1.93887	1.77612	2.6419		POU3F1	2.51418	10.9431	2.0119	0.082809	0.599696	2.42094	1.73096	2.53758		POU3F1	3.73125	10.2611	4.60467	0.083068	0.939281	2.08164	1.85388	1.60465		PLUNC	0	0	0	0	0	0	0	0
PPARG	0.351328	0.396771	1.78388	0.286497	0.65806	1.62124	1.21313	1.0091		PPARA	0.480261	0.403836	1.10589	0.642321	0.389201	0.897333	0.900655	2.33195		PPAPDC1A	4.14892	4.57915	3.45317	0.7567	3.1422	1.84491	2.66493	2.7084		PPAPDC1A	2.03042	2.77621	2.46574	0.601148	2.72911	2.5436	2.0227	3.57361		PLXNA2	15.7189	3.93796	3.00644	0.180024	0.399739	1.12391	5.57773	4.8921
PPIL2	5.87583	5.75144	2.64335	0.338295	0.687339	1.98072	3.11715	2.0778		PPARD	5.34536	5.82095	17.8536	3.33268	3.9665	10.6505	18.8335	15.1733		PPARA	0.629002	0.538955	0.664103	0.917006	0.424072	0.887556	1.75352	3.13468		PPARA	0.823089	0.265503	0.656079	0.231269	0.160987	0.822448	0.335334	3.49584		PMCH	0	0.693016	0.293171	0.124509	0.156033	0.184044	0.075657	0.079917
PPM1F	4.93141	5.64555	4.18681	0.125141	0.728586	3.1814	7.14374	7.01933		PPARG	0.250632	0.344505	1.46717	0.684399	0.717004	1.37981	1.72582	1.01924		PPARD	4.70103	8.34107	10.7419	3.4495	6.33487	11.4416	14.7607	14.1773		PPARD	6.84827	4.10618	14.6888	1.09265	7.6355	9.43047	19.2667	16.0972		PNPO	2.81103	2.90633	6.52906	1.75744	4.07977	5.43265	9.47551	7.43626
MITF	0.046334	0.203735	0.300012	0	0.088807	0.405322	0.955622	1.20633		PPIL2	4.33519	4.94712	4.37847	0.387924	0.783745	1.72041	3.19742	2.42441		PPARG	0.726038	0.545524	0.849722	0.067888	1.09941	1.56446	1.53811	1.06008		PPARG	0.43832	0.553916	0.511882	0.159887	1.12343	1.11994	0.766402	0.833554		POM121L2	0	0	0.032032	0	0	0	0	0
MLLT10	3.74407	3.39256	1.67244	0.504844	0.50728	1.14639	2.18825	1.98947		PPM1F	4.37101	3.70916	4.21235	0.884597	0.834455	3.81867	7.14969	4.62916		PPIL2	3.75888	5.90513	2.25101	0.421882	1.01748	2.11421	2.92161	2.91719		PPIL2	4.53029	5.18704	3.42879	0.300776	1.69092	1.61626	3.01125	2.98653		PON1	0.123709	0.077707	0.037655	0.328827	0.100546	0.212022	0.048319	0.15843
MMP3	0	0	0.210401	0	0	0	0	0		MITF	0.164483	0.052914	0.440628	0.050993	0.0673	0.609679	0.85827	1.25672		PPM1F	2.08627	4.62966	2.56316	0.312865	1.71075	2.65748	5.58058	5.66914		PPM1F	4.05401	2.24242	5.10527	0.249464	1.98668	2.43838	7.23696	6.14366		POU3F1	6.98901	10.9635	1.45593	0	0.398346	1.46986	1.20074	1.4816
MMP9	0.095745	1.06022	0.187553	0.090416	0.039929	0	0.142831	0		MLLT10	4.24032	2.57798	2.32547	0.866189	0.472646	0.96484	1.99604	1.5046		MITF	0.03165	0.241523	0.140972	0.061505	0.269825	0.93886	1.14508	1.48998		MITF	0.125272	0	0.310274	0	0	1.27296	0.882603	1.82315		PPAPDC1A	1.22609	2.04473	2.52408	0.884834	2.11476	3.04601	1.91864	3.14138
MOV10L1	0.310099	0.142189	0.143267	0.146353	0.583884	0.125634	0.169479	0.390986		MMP3	0	0	0.60918	0	0.041617	0	0	0		MLLT10	2.80443	2.3876	1.11673	0.773887	1.10726	1.04865	1.94691	1.74059		MLLT10	4.3046	2.53247	0.877905	0.54096	0.796176	1.0862	2.29594	1.84922		PPARA	0.182129	0.128596	0.819806	0.205101	0.837258	0.72067	0.756689	2.74244
MPZ	0.951447	0.16826	0.082541	0.212479	0.478553	0	2.62092	1.94624		MMP9	0.017977	0.425145	0.0137	0.054747	0.095172	0.02507	0.048849	0.009503		MMP3	0	0	1.0805	0	0.43387	0.039751	0.06096	0.03		MMP3	0	0	0.843876	0	0	0.028876	0	0.030302		PPARD	7.64124	4.16056	14.2694	1.3823	5.06554	7.60674	14.3989	14.7372
NEU4	0.443786	0.900874	3.84838	3.83071	5.87812	3.02138	4.1486	5.05483		MOV10L1	0.326009	0.106778	0.305294	0.191546	0.393311	0.151517	0.412306	0.36445		MMP9	0.06321	0.511958	0.087554	0.052542	0.088679	0.06776	0.076026	0.076927		MMP9	0.078623	0.295094	0.068363	0.027777	0.220131	0.020219	0.116602	0.094043		PPARG	0.376205	0.594898	1.00012	0.36762	1.15199	2.12481	1.64427	0.559565
PICK1	13.3604	10.7978	19.9353	1.44945	7.49563	11.1438	14.8184	8.13987		MPZ	0.291476	0.139132	0.260031	0.110139	0.520344	0.11686	1.18969	1.42755		MOV10L1	0.460863	0.093684	0.478458	0.086392	0.453263	0.080021	0.263164	0.331481		MOV10L1	0.304616	0.077458	0.336104	0.086858	0.515087	0.081533	0.344411	0.306875		PPIL2	6.07097	4.3156	2.36077	0.230322	0.717797	1.1658	3.44065	2.42533
PPP3R2	0	0	0	0	0	0	0	0		NEU4	0.295795	1.10623	3.08265	5.45526	3.08074	3.49898	3.22658	4.02844		MPZ	0.065388	0.118162	0.259471	0.388905	2.47023	0.320341	1.56673	1.25463		MPZ	0.501397	0.060553	0	0	0.858952	0.094832	1.28606	1.54402		PPM1F	5.92964	2.29237	2.62519	0.383596	0.785	3.90282	4.44787	4.16315
PRKCA	3.38511	3.31842	9.56021	0.268315	0.439532	6.31243	12.7668	13.7218		PPP3R2	0.111414	0	0	0	0	0	0	0		NEU4	0.395934	1.51008	2.13347	4.65848	8.7847	2.26197	2.32007	3.50824		NEU4	0.354505	1.07015	6.02962	2.48666	10.1801	2.3033	3.12071	4.20452		MITF	0.110066	0.025127	0.539932	0.054716	0.023193	0.422821	0.972158	1.67849
PROZ	0.094897	0	0.12162	0.005044	0	0.06144	0	0.117746		PRKCA	6.23186	1.60531	12.2841	0.785517	0.773968	4.17073	15.6389	9.11654		PICK1	10.0732	11.8125	15.4984	1.66659	8.85382	9.67828	8.61794	9.76854		PICK1	11.9232	10.8984	17.2096	0.954476	11.1933	8.16293	13.6971	10.1575		MLLT10	3.51887	1.63334	1.65151	0.568889	1.03858	0.83586	1.75926	1.57766
PRSS16	0.054042	0	0.496052	0.121801	0.332547	0.479519	0.679175	0.201186		PROZ	0.045439	0.082813	0	0	0.048113	0.11975	0	0.133606		PPP3R2	0	0.079076	0.098843	0	0	0.152993	0	0		PPP3R2	0	0	0	0	0	0	0	0		MMP3	0	0	0.689163	0	0.096906	0	0.071378	0.086089
PRX	2.33602	1.45102	1.66197	0.335535	0.295205	0.76092	1.19001	1.78786		PRSS16	0	0	0.453359	0	0.273671	0.559955	0.881723	0.355506		PRKCA	3.18098	4.62878	4.05736	0.293636	2.31685	5.26126	10.854	11.7714		PRKCA	5.10518	0.565429	4.24532	0.213659	0.202353	4.24929	11.9214	11.3747		MMP9	0.067343	0.274933	0.06681	0	0.048193	0.279837	0.014991	0.048111
PSEN1	9.3206	13.5946	7.38073	1.31488	1.73084	8.92017	14.3318	11.1748		PRX	1.27216	1.68342	1.35301	0.566108	0.124895	0.875368	0.954007	1.314		PROZ	0.021404	0.073432	0	0	0	0.13407	0.144212	0.094546		PROZ	0.099914	0	0	0	0	0.091004	0	0.057586		MOV10L1	0.510446	0.087746	0.236085	0.256651	0.454166	0.107658	0.2874	0.218902
PSEN2	5.35318	9.13076	7.50858	0.989065	2.24605	8.92164	4.06248	4.09374		PSEN1	9.56228	9.7033	12.1909	2.6097	2.9724	9.05854	12.8716	16.0202		PRSS16	0.036915	0.029546	0.081767	0	0.375676	0.522068	0.313528	0.33718		PRSS16	0.036776	0	0.604237	0.037925	0.894319	0.48421	0.992848	0.149147		MPZ	0.546663	0.230427	0.479026	0.491561	0.508195	0.427501	0.948453	1.3698
PTAR1	0.456049	0.601824	0.531158	0.219688	0.193596	2.0133	2.39002	4.33496		PSEN2	4.99466	9.86301	6.03867	2.40532	2.97722	8.14635	5.66194	5.41754		PRX	2.13328	2.36073	1.2681	0.453841	0.704867	0.597379	0.556408	1.30129		PRX	1.48821	1.11633	1.05726	0.169696	0.634455	0.693727	0.910016	1.17996		NEU4	1.29596	0.925111	1.5467	2.30886	4.1774	3.07101	2.09036	4.63835
PTEN	9.64044	15.418	13.2852	1.07615	1.42854	9.79378	14.9264	7.7818		PTAR1	0.698202	0.480514	1.47606	0.226199	0.428578	2.1336	2.68139	3.39587		PSEN1	9.09772	13.1885	6.65264	1.92379	4.41514	10.1803	15.9314	15.4388		PSEN1	11.7353	11.2106	7.69447	1.17851	4.10574	19.0137	14.0295	19.3957		PPP3R2	0	0	0.195087	0	0	0	0	0
PTGFRN	6.34611	6.948	6.84319	0.160425	0.218764	2.6535	8.36145	4.30358		PTEN	14.8707	10.036	19.9529	3.08178	3.07767	9.13503	15.8532	6.66847		PSEN2	5.69067	11.0111	6.90845	1.30677	3.75501	5.92556	5.46861	4.47322		PSEN2	4.14723	9.009	6.36156	0.415521	4.10746	6.0841	4.74898	4.53421		PRKCA	4.96352	0.619408	7.54772	0.420789	0.29536	3.2741	10.0325	10.0949
PTGS1	0	0.371844	0.822321	0.050072	0.112356	0.16511	0.81551	0.19743		PTGFRN	6.17241	5.223	6.13731	0.868345	0.493121	2.5271	5.53764	3.31728		PTAR1	0.707399	0.877051	0.39291	0.430904	0.490593	2.38447	3.12415	4.38311		PTAR1	2.27989	0	1.02258	0.137427	0	2.29081	2.46865	5.32891		PROZ	0.058838	0.072839	0	0.065547	0.012996	0	0	0.006333
PTGS2	0.147849	3.98384	1.59289	0.052243	0.114734	1.14953	3.46837	0.407528		PTGS1	0.056834	0.167313	0.648103	0.237897	0.096371	0.116996	0.667599	0.320643		PTEN	14.1141	12.6236	10.6758	1.9481	3.07599	8.13819	14.1746	9.24607		PTEN	13.4143	9.49305	13.4779	1.55923	1.13588	9.0586	14.1377	7.25938		PRSS16	0.111027	0.029307	0.240321	0.033634	0.140737	0.725165	0.368861	0.095579
RANBP1	12.2395	15.9611	8.50306	4.05321	13.6171	9.105	7.29817	6.18832		PTGS2	0.253091	1.04383	3.06699	0.051021	0.280721	1.0841	8.31551	0.971517		PTGFRN	4.42128	7.79957	3.74822	0.464979	0.764141	2.59021	4.28291	4.2369		PTGFRN	8.1417	4.45781	4.0258	0.254468	0.15805	2.3629	6.16533	3.86514		PRX	3.06291	1.46806	0.740469	0.160346	0.284971	0.666825	0.601385	1.08056
RAPGEF6	1.53039	0.625036	0.458657	0.053376	0.102781	0.334893	1.28237	0.94573		RANBP1	10.4785	15.8757	8.14692	5.92199	12.3588	9.22729	7.64563	10.8237		PTGS1	0	0.024626	0.200589	0.117963	0.338533	0.18691	0.484928	0.448665		PTGS1	0.090303	0.290079	0.375631	0.029583	0.223003	0.103056	0.7606	0.636639		PSEN1	8.76648	6.0902	8.66415	1.12214	3.2795	6.62256	13.4374	17.7818
RBM24	8.9855	17.7584	5.53451	0.295276	0.394192	4.87472	4.17712	3.16086		RAPGEF6	2.00951	0.268991	0.709601	0.069034	0.054387	0.459649	1.36145	0.894894		PTGS2	0.220389	2.29365	0.741079	0	1.83493	0.563507	3.10879	1.10846		PTGS2	0.188437	1.61342	2.90638	0	0.463773	1.10213	4.21058	0.857336		PSEN2	11.3103	9.77493	5.01306	1.08466	2.69528	5.6043	5.72817	4.51002
RELN	4.01197	10.0656	7.41706	0.17044	0.101002	0.87817	1.32868	2.93358		RBM24	8.78858	15.2494	4.52905	0.112696	0.681329	4.48847	4.53962	2.00272		RANBP1	15.9629	13.7696	11.3437	3.56526	11.7376	7.65291	7.38969	10.0999		RANBP1	16.5328	19.3756	7.45394	4.16679	10.8825	8.8808	6.75961	8.95347		PTAR1	0.461694	0.035885	0.935465	0.231254	0.166462	2.49972	2.98364	5.73362
RET	0.28208	1.28811	0.470264	0.047417	0.125472	0.596106	1.08018	0.796894		RELN	3.69028	7.70864	8.92515	0.265093	0.457122	0.79132	1.80624	3.2806		RAPGEF6	1.25729	0.627053	0.257056	0.084397	0.311449	0.592203	1.27069	1.17076		RAPGEF6	1.61917	0.253992	0.334876	0.07628	0.01285	0.684095	1.36891	1.10752		PTEN	8.6235	6.70049	19.8204	2.23771	1.33786	13.2649	16.4736	7.40361
RGS10	0.721017	2.16631	8.09701	4.10027	9.56505	2.84874	7.56622	7.83209		RET	0.400803	1.0431	0.330895	0.050012	0.139832	0.495988	1.2009	0.826316		RBM24	4.01579	8.44343	2.50247	0	0.619716	3.54864	2.99759	2.42944		RBM24	7.49511	10.9941	4.4604	0.220569	0.861583	3.43071	3.77956	1.84606		PTGFRN	7.24636	2.84626	3.93469	0.148752	0.392564	1.63598	5.13339	3.55646
RGS9	3.19605	2.77002	1.85543	0.37822	0.432482	0.435061	0.373759	0.638154		RGS10	1.66014	3.15114	6.68755	6.28114	7.43647	3.19797	8.17279	4.04691		RELN	1.58686	7.89325	5.29784	0.209776	0.343449	1.30262	1.4775	2.43917		RELN	2.4284	2.71256	4.07051	0.097254	0.143003	0.851213	1.73031	3.61004		PTGS1	0.069891	0.194421	0.192544	0.104233	0.134348	0.067978	0.525033	0.244553
RHO	0	0	0	0	0.080145	0.994013	1.34762	0		RGS9	2.24857	3.3643	1.50378	0.347786	0.510835	0.408293	0.519043	0.775499		RET	0.640366	1.3932	0.411499	0.06613	0.744484	0.483806	0.972826	1.39391		RET	0.354597	0.589844	0.492107	0	0.153736	0.420062	1.18944	0.761256		PTGS2	0.03274	1.13755	1.74558	0.054746	0.292891	1.60504	3.86502	1.16024
RORB	5.59852	6.58571	4.86892	0.39274	0.222767	3.99532	11.3697	5.02068		RHO	0	0	0	0	0.115376	0.715711	0.402971	0.214311		RGS10	0.998453	1.69313	6.96723	5.85995	9.94815	3.61385	6.88793	3.25088		RGS10	1.52279	1.41665	6.29941	4.30077	10.7476	4.80001	9.21955	5.03701		RANBP1	12.6711	17.5441	13.1695	4.24237	14.5548	9.68375	9.60074	9.41655
RPGRIP1L	2.64335	1.89474	2.37569	0.057659	0.093985	1.12764	2.18426	1.01411		RORB	8.70188	2.69561	4.14133	0.489119	0.537553	3.60663	10.8536	4.02018		RGS9	2.92008	3.11836	1.63746	0.265429	0.609564	0.483662	0.589345	0.905606		RGS9	1.76933	2.26562	0.93336	0.199149	0.50178	0.643461	0.630781	1.05549		RAPGEF6	0.804832	0.172884	0.492494	0.055933	0.056495	0.438398	1.05756	1.15607
RSRC1	5.26206	4.58787	5.43296	1.30485	1.53664	7.2724	10.7805	5.98875		RPGRIP1L	3.48749	1.62654	2.91119	0.190443	0.338393	1.23097	2.24824	1.20916		RHO	0	0	0	0	0.33969	0.150143	0.058692	0.426747		RHO	0.054055	0	0	0	0	0.533598	0.471207	0.13707		RBM24	15.9554	11.2783	2.99045	0	0.223115	2.60682	4.42382	1.46405
RUNX1	0.047215	0.183991	0.260032	0	0.006986	0.027811	0.108688	0		RSRC1	6.96718	4.68633	8.25656	2.11423	3.58264	6.3223	12.5771	6.9535		RORB	4.37356	5.13797	1.76756	0.716213	3.26133	2.6369	5.39514	6.43812		RORB	7.80143	1.76824	1.31913	0.626913	0.443298	2.87736	9.64499	4.5992		RELN	2.84362	2.27636	5.60832	0.380237	0.207599	0.932895	1.24137	1.19153
RYR3	1.41864	0.210461	0.753038	0.051091	0.063544	0.276878	0.738724	1.87031		RUNX1	0.032384	0.215677	0.057584	0.05126	0.034289	0.09912	0.117609	0.047933		RPGRIP1L	2.16299	1.71144	1.28297	0.265568	0.314324	1.13059	2.15551	1.45361		RPGRIP1L	2.56094	1.10648	1.10729	0.186019	0.157249	1.3231	3.06449	1.26177		RET	0.425395	0.340672	0.338173	0.029415	0.084751	0.330218	0.857007	0.645343
SCGB1A1	0.827135	0.169067	0	0	0.60922	0.141914	0	0.536584		RYR3	1.95266	0.142469	1.07476	0.146718	0.069715	0.27079	0.584263	0.875615		RSRC1	6.11331	4.0509	6.03963	2.92122	3.0098	6.29201	9.66103	7.16207		RSRC1	7.93111	4.03962	3.05113	1.46298	1.50786	5.80714	10.1846	7.04956		RGS10	0.651816	3.92157	6.78364	4.50087	11.7556	9.5092	5.55985	3.40219
SCRT2	7.17392	10.1104	0.168002	0	0.182172	0.466793	1.11595	0.813251		SCGB1A1	0	0.51244	0	0.050067	0.44452	0.019601	0.973698	0.15535		RUNX1	0.032252	0.151346	0	0.061827	0.076897	0.041165	0.034414	0.108353		RUNX1	0.031696	0.055559	0.406301	0.039931	0.118482	0.026399	0.21991	0.075584		RGS9	1.21402	0.726935	0.932464	0.334572	1.34644	0.585854	0.41296	1.04594
SELENBP1	0.617557	2.74248	3.3051	6.91276	5.0929	5.18516	3.80385	18.5594		SCRT2	1.21889	8.72859	0.665151	0	0	0.259198	0.613405	0.451351		RYR3	1.78984	0.513986	0.538945	0.164476	0.095012	0.427777	0.748648	1.25105		RYR3	0.754942	0.15401	0.373262	0.090862	0.032506	0.253644	0.675851	1.19503		RHO	0	0	0	0	0.070807	0.676188	1.09852	0.227639
SEMA3A	6.67476	4.71443	2.15934	0.081154	0.115074	0.250111	1.68144	1.15107		SELENBP1	0.938424	2.22825	3.45238	8.93933	4.2307	7.2381	4.30665	11.0711		SCGB1A1	0.991582	0	0.186226	0	0.532475	0.177234	0.533561	0		SCGB1A1	1.06384	0.012333	0	0.335924	0	0.219706	0	0.164048		RORB	8.11486	1.1381	4.18898	0.471024	0.44012	1.38453	8.05076	4.85388
SEMA3D	0.177719	0.190769	1.12732	0	0.017737	0.15209	0.629737	0.062488		SEMA3A	7.93793	3.3338	2.44013	0.199487	0.12986	0.371499	1.83394	1.24039		SCRT2	1.1987	8.70165	0.334117	0	0.927712	0.133949	0.200111	0.485659		SCRT2	5.13947	8.8783	1.54452	0	0.459295	0.17372	1.07835	0.520375		RPGRIP1L	1.67474	1.01654	2.25328	0.040055	0.210212	0.821447	2.36521	1.02286
SEPSECS	1.0276	1.03068	0.419372	0.062459	0.054793	0.407741	0.632762	0.684231		SEMA3D	0.144689	0.020351	0.763621	0	0.051067	0.223449	0.916423	0.192404		SELENBP1	0.520686	1.65904	3.5326	8.50633	8.99158	4.33564	6.82969	11.2266		SELENBP1	1.1113	1.45482	6.673	5.6483	9.60955	5.17764	4.21129	13.2967		RSRC1	3.42258	2.67152	9.37298	0.326303	2.46819	3.36645	12.4743	5.34019
SERPINA1	0.131221	3.13997	0.806844	0.559091	0.932149	0.595983	1.96967	0.469643		SEPSECS	1.74921	0.597453	0.706119	0	0.162095	0.935974	1.30278	1.00256		SEMA3A	7.02036	5.44697	1.72629	0.349209	0.32718	0.449876	2.27745	1.41275		SEMA3A	6.81324	2.38627	1.2083	0.146773	0	0.763492	1.29524	1.1402		RUNX1	0.074772	0.278497	0.028353	0	0	0	0.14027	0.087696
SERPINA3	0	0.355254	0.114949	0.986906	1.14538	0	0	1.17453		SERPINA1	0.182473	1.28865	0.805688	0.581623	0.96539	0.312386	1.06858	0.972682		SEMA3D	0.073036	0.097694	0.108142	0	0.080414	0.083013	0.672967	0.284989		SEMA3D	0.144866	0.06061	0.319656	0	0	0.339507	0.729264	0.39009		RYR3	2.42094	0.341426	0.773137	0.13494	0.047587	0.098943	0.398134	1.21838
SFRP1	3.55726	3.46875	2.84498	0.086785	0.095551	1.66176	3.259	2.6981		SERPINA3	0	0.106776	0.224972	1.72091	0.265467	0	0.132574	1.34738		SEPSECS	1.20384	0.750084	0.347286	0.219722	0.22633	0.656058	1.39594	1.07876		SEPSECS	1.80125	0.664262	0.977412	0.106713	0.452964	0.891051	0.725907	1.29598		SCGB1A1	0.111342	0	0	0	0.304309	0.185634	0	0.280038
SH2D1B	0	0.11508	0	0	0	0.09792	0.959074	0		SFRP1	2.44785	2.26673	1.86048	0.257747	0.170084	2.59609	2.99817	3.33242		SERPINA1	0.317408	1.0321	0.605972	1.17278	1.05045	0.373318	1.58603	0.596222		SERPINA1	0.269729	1.7336	1.0681	0.70012	1.11643	0.453598	1.88251	1.30802		SCRT2	5.37305	9.37775	0.38468	0	0	0.228205	0.741696	0.793014
SHMT1	0.700242	0.908214	0.920258	0.556894	0.545231	1.02056	1.09298	1.29164		SH2D1B	0	0	0	0	0	0	1.13569	0.259287		SERPINA3	0	0.13834	0.270826	2.3924	1.9933	0.117949	0.363881	0.903029		SERPINA3	0	0.261415	0.698193	0.309279	0.312131	0.159922	0	0.942049		SELENBP1	0.703321	2.87717	3.93111	6.75877	5.81089	8.08653	3.3738	13.5819
SIL1	3.13898	4.4249	9.17377	2.11983	8.4331	11.8115	9.13242	7.38621		SHMT1	0.809047	1.07816	0.305688	0.79554	0.579856	0.941971	0.799954	1.66282		SFRP1	1.94062	6.87336	1.41675	0.417307	0.517873	1.6489	3.19572	3.67712		SFRP1	14.1398	3.47316	1.20874	0.206495	0	3.66437	3.35168	4.8366		SEMA3A	5.26472	1.84316	2.60792	0.05843	0.159882	0.197659	1.93648	1.1724
SIPA1L3	3.54906	4.13348	3.9538	0	0.179643	1.4362	3.11412	2.88062		SIL1	2.58719	4.26411	9.79199	5.2767	6.92177	11.7181	7.88389	10.3428		SH2D1B	0	0	0	0	0	0.374937	0.305758	0.222617		SH2D1B	0	0	0.211151	0	0	0	0	0.110134		SEMA3D	0.126231	0.038656	0.943134	0	0.010125	0	1.00754	0.44878
SIRT1	10.0401	11.0914	3.49645	0.166703	0.325563	4.29604	4.83759	3.43658		SIPA1L3	2.68127	3.59462	3.93942	0.290457	0.169875	1.52894	3.1885	2.31376		SHMT1	0.882961	1.15173	0.565248	0.739159	0.791074	0.684175	0.941702	1.11005		SHMT1	0.85326	1.41244	0.566343	0.197839	0.958037	1.00774	0.962907	1.36118		SEPSECS	1.02363	0.261044	0.640016	0.316642	0.313796	0.439286	1.29163	1.17213
SIRT5	2.86003	4.36057	3.53814	2.19817	3.17392	6.05964	6.14628	5.75463		SIRT1	11.8025	9.47088	4.68232	0.491711	0.868893	3.63269	4.76679	3.71544		SIL1	2.77434	4.61506	7.12035	3.57136	10.6826	9.93106	6.35949	9.07293		SIL1	3.24156	3.68174	6.53826	1.91409	10.0398	10.0973	7.52591	8.98003		SERPINA1	0.208522	1.77971	0.784211	0.338577	0.786852	0.329016	1.21579	0.876546
SLC12A6	4.59469	3.3285	3.5193	0.037938	0.081873	1.6066	4.47365	2.55031		SIRT5	3.91053	4.00647	5.12063	1.60397	3.20411	4.9912	5.82616	6.0569		SIPA1L3	2.30379	4.40268	1.99552	0.041531	0.744765	1.23676	2.33169	2.93754		SIPA1L3	3.36721	2.03844	2.7441	0.052289	0.155958	1.25528	3.80773	2.61251		SERPINA3	0	0.377706	0.169201	0.872314	0.737384	0.062456	0.155984	1.07235
SLC15A1	0	0	0.060056	0	0	0	0	0		SLC12A6	5.54591	2.26486	4.24111	0.0748	0.237112	1.78893	4.52188	2.98202		SIRT1	10.4076	10.6156	2.46263	0.581796	0.971927	3.28293	4.11116	3.78813		SIRT1	13.2993	8.66487	2.98859	0.334728	0.321052	4.16954	4.43729	4.29933		SFRP1	1.39751	1.52872	1.71107	0.092188	0.117228	2.29079	1.83044	3.92988
SLC17A6	0.720708	0.787322	3.52227	0.054145	0.023588	1.55207	2.84432	0.622006		SLC15A1	0.039115	0	0	0	0	0	0	0		SIRT5	2.94441	4.01149	3.55586	2.18534	4.39585	5.75046	6.40439	6.41773		SIRT5	3.5641	4.31561	5.05607	2.08115	3.86794	5.3548	7.90494	5.66919		SH2D1B	0	0.338847	0	0	0	0.304564	0.623804	0.089403
SLC18A1	0	0.001576	0	0	0	0	0	0		SLC17A6	1.3997	1.00842	4.96118	0.104328	0.374875	1.14203	3.3707	1.23727		SLC12A6	2.93203	3.72209	2.15947	0.12479	1.01201	1.85149	4.5667	3.58738		SLC12A6	4.91263	1.29585	2.05878	0.077814	0	2.42944	4.50634	3.63402		SHMT1	0.647567	0.816063	0.485667	0.503475	0.66254	1.07058	0.945035	1.27894
SLC18A2	0.084307	0.108538	0.076713	0.069397	0.026998	0.055072	0	0.040392		SLC18A1	0.034252	0	0	0.009422	0	0	0	0		SLC15A1	0	0	0	0	0	0	0	0		SLC15A1	0.022262	0	0.072361	0	0	0	0	0		SIL1	3.51793	5.0443	5.08124	1.86116	6.91743	7.85171	6.1881	8.5823
SLC1A5	1.19171	2.06914	0.283243	0.11565	0.103883	0.102623	0.591411	0.555885		SLC18A2	0.174985	0.036419	0.067059	0	0.024491	0.057138	0.167073	0.007071		SLC17A6	0.781923	1.23068	1.73248	0.063779	1.46581	0.946971	1.46001	2.73592		SLC17A6	2.84816	0.600242	2.46623	0	0.241143	1.13164	3.69155	1.07197		SIPA1L3	5.14896	1.68744	2.29022	0.018599	0.114314	0.737101	2.16951	2.79298
SLC22A4	1.14556	0.990416	0.888344	0.396027	0.348417	0.868586	0.262286	0.566044		SLC1A5	0.803017	2.52734	0.126016	0.284284	0.037519	0.083089	0.208823	0.288111		SLC18A1	0	0.091333	0.013023	0.010417	0	0	0	0		SLC18A1	0	0	0	0	0	0	0	0		SIRT1	7.35491	5.1565	4.45388	0.165837	0.309943	3.04604	4.08014	4.15953
SLC24A5	10.9235	9.61449	4.61868	2.94429	1.85588	3.22631	4.18779	3.09889		SLC22A4	0.928847	0.998226	0.815361	0.345972	0.363391	0.645204	0.864359	0.646656		SLC18A2	0.163252	0.164552	0.113308	0	0.040945	0.095978	0.099925	0.106602		SLC18A2	0.199556	0.048534	0	0.028797	0.053351	0.038197	0	0.040869		SIRT5	2.32282	4.32068	5.19228	2.01296	5.23091	5.65208	7.09654	5.47454
SLC25A12	8.45196	12.3665	12.0128	0.94725	2.06019	16.5237	19.7276	7.81295		SLC24A5	14.1499	7.38453	6.57231	3.92353	3.02582	2.58049	3.56564	3.4542		SLC1A5	0.643317	1.8692	0.220054	0.146422	0.636998	0.030247	0.119583	0.3805		SLC1A5	0.923572	1.57061	0.158104	0.034396	0.376662	0.170106	0.273529	0.248859		SLC12A6	3.76873	0.625923	3.04826	0.193152	0.070108	0.600008	4.6269	3.67405
SLC25A14	5.54658	6.74423	7.32838	0.924241	4.5434	9.27499	8.55673	5.91901		SLC25A12	12.5344	11.399	15.8505	1.95728	3.89081	16.0855	19.4844	9.18915		SLC22A4	1.03805	1.09784	1.10137	0.624116	0.414018	0.699486	0.710922	0.479		SLC22A4	0.756218	0.894074	0.766438	0.223921	0.857765	0.52171	0.890685	0.749459		SLC15A1	0.031505	0	0	0	0	0	0	0
SLC25A27	8.48144	6.10013	5.3936	0	0.970141	7.15843	13.6544	7.32284		SLC25A14	6.53364	7.29315	10.5248	0.864238	6.413	9.25703	10.7672	6.19005		SLC24A5	11.6062	8.76139	5.42953	3.44909	2.71806	3.23417	5.20974	3.8682		SLC24A5	12.3465	8.68515	4.79486	3.07962	2.88147	3.5212	4.04666	2.91898		SLC17A6	2.17475	1.44202	3.69975	0	0.071826	1.57572	4.33084	2.09391
SLC35B3	2.98261	3.16116	2.06382	0.65837	0.833423	2.07929	2.53265	1.7888		SLC25A27	11.1302	5.80639	7.00671	0.470812	1.57288	6.58237	13.9988	6.79373		SLC25A12	9.99101	11.5258	12.1188	1.08507	5.90042	12.8329	15.0878	11.8472		SLC25A12	9.98418	10.6796	15.4343	0.518663	5.50305	14.014	15.8219	8.88854		SLC18A1	0.030504	0	0	0.0615	0.00857	0	0	0
SLC39A14	0.978659	1.75862	2.77856	0	0.095158	3.51009	3.88861	1.775		SLC35B3	4.12286	2.79763	2.91691	1.46092	1.32842	2.2966	2.88797	2.23237		SLC25A14	8.03097	4.78441	8.54773	0.881055	4.72541	8.26176	8.48633	6.44407		SLC25A14	7.17937	8.05223	4.17563	0.711406	7.22992	8.09599	8.51538	5.45288		SLC18A2	0.015093	0.087454	0.092449	0	0	0.047531	0.058898	0.018152
SLC44A4	0	0	0.006819	0	0	0	0.090396	0		SLC39A14	1.37441	1.28693	2.9907	0.105219	0.297434	3.08717	4.48797	2.22321		SLC25A27	11.0508	6.68202	4.93568	0.525705	2.913	6.01349	14.2539	7.70792		SLC25A27	9.73799	4.76079	4.40441	0.202215	2.23671	4.88052	14.8362	7.11561		SLC1A5	2.84914	2.7368	0.339577	0	0.17892	0.180707	0.170004	0.297746
SLC6A2	0.042002	0.023204	0.035428	0	0	0	0	0.074652		SLC44A4	0	0	0	0	0	0	0	0		SLC35B3	4.46922	3.14809	2.59483	1.06023	1.74115	2.45356	3.51766	2.6308		SLC35B3	3.67919	3.15704	2.21804	1.15691	1.50371	2.40007	1.99169	1.91999		SLC22A4	1.2033	0.929356	0.509033	0.224522	0.779559	0.901671	0.808352	0.653099
SLC6A3	0	0	0	0	0	0	0	0		SLC6A2	0	0	0	0.046226	0	0	0	0.021033		SLC39A14	0.923556	2.18818	1.32389	0.062597	0.96767	2.07108	3.30584	2.89271		SLC39A14	0.935465	0.935075	1.28477	0.043869	0.35663	2.4273	3.60043	2.21161		SLC24A5	6.94734	9.03276	6.51284	3.17021	2.945	3.15574	4.3294	3.35833
SLC6A4	0	0.15842	0.07329	0	0.040855	0	0	0		SLC6A3	0	0	0	0	0	0	0	0		SLC44A4	0	0	0	0	0	0	0	0		SLC44A4	0	0	0.08805	0.051583	0	0	0	0		SLC25A14	6.26238	7.82161	10.4187	0.620302	5.48184	7.14339	9.93729	4.39111
SLC6A5	0	0	0	0	0	0.007477	0	0		SLC6A4	0.094874	0.669425	0	0	0	0	0.032036	0		SLC6A2	0	0	0.025213	0.055002	0	0	0	0		SLC6A2	0	0	0	0	0	0	0	0		SLC25A27	6.30324	3.43703	5.54493	0.352809	1.48851	5.56606	15.2297	6.44906
SLC6A9	1.62642	3.2141	2.17202	0.218846	0.953589	2.7133	5.60506	7.29705		SLC6A5	0.012685	0	0	0	0	0.012237	0	0		SLC6A3	0	0	0	0	0	0	0	0		SLC6A3	0	0	0	0	0.113108	0	0	0		SLC35B3	2.88252	2.73673	2.31078	0.913978	1.87361	2.46189	3.33492	1.97671
SLIT3	0.923773	1.16578	6.65522	0.20963	0.47027	3.45016	5.10667	2.24684		SLC6A9	1.61395	3.22117	2.30157	0.806704	0.764966	2.70373	4.48783	7.01777		SLC6A4	0.017668	0.091619	0	0	0.003636	0.038661	0	0		SLC6A4	0.034438	0.024482	0	0.008236	0	0	0	0.022003		SLC39A14	0.881325	0.591983	1.5598	0.126632	0.181398	2.0284	4.40815	1.8714
SMARCC1	10.5745	7.21549	3.75532	1.20859	1.11215	1.77425	2.39416	4.89311		SLIT3	0.57432	0.905911	5.51867	0.258856	0.544099	2.52854	3.13249	2.0539		SLC6A5	0	0	0	0	0.041262	0	0	0		SLC6A5	0.047762	0	0	0	0	0	0	0.037113		SLC44A4	0	0	0	0	0.024437	0	0	0
SNAP29	8.71543	8.95433	12.2232	4.59044	8.49313	9.10137	14.5918	9.21132		SMARCC1	9.05904	5.09208	3.94947	1.26036	0.835416	2.32513	3.30625	4.37878		SLC6A9	1.21516	3.18879	1.54071	0.66828	2.25426	3.14276	4.17882	6.4959		SLC6A9	1.71622	2.30266	2.16183	0.299697	2.15855	5.52579	3.33924	9.60271		SLC6A2	0.033259	0	0	0	0	0.104457	0.051964	0
SORBS3	3.56722	4.59088	4.31621	3.00968	3.31638	2.99471	4.52318	10.9972		SNAP29	8.08433	9.47948	10.1256	4.82656	6.44766	10.6802	16.3737	9.61422		SLIT3	0.544031	1.5876	3.58457	0.340336	1.35702	2.95443	3.08998	2.48882		SLIT3	0.959033	1.07303	3.75941	0.091429	0.772309	2.15205	4.49011	2.15716		SLC6A3	0	0	0	0	0	0	0	0
SP4	6.02817	9.42547	3.35118	0.120558	0.035654	1.70866	2.22087	1.75514		SORBS3	1.52897	4.30411	3.5606	6.48154	2.08237	3.36082	4.01002	9.13672		SMARCC1	7.48219	6.95645	2.61332	1.45717	1.19218	2.13185	2.97108	4.37424		SMARCC1	12.3386	4.42055	2.20417	1.05276	1.12845	2.67726	3.4893	5.65239		SLC6A4	0.032948	0.088715	0.049635	0	0.020546	0	0	0
SRD5A2	0	0	0	0	0	0	0	0		SP4	7.62387	4.98776	3.0901	0.176341	0.181754	1.6965	2.8971	1.64879		SNAP29	7.54783	9.83754	7.88102	4.57474	9.41816	8.84291	16.2479	10.2256		SNAP29	7.93422	7.18719	11.726	3.46518	10.4942	10.0311	14.5661	8.92178		SLC6A5	0	0	0	0	0	0	0	0
SREBF1	5.2355	6.65431	2.0982	1.30132	2.36074	4.09209	5.57471	15.019		SRD5A2	0	0	0	0	0	0	0	0		SORBS3	2.67448	5.7057	3.7618	5.22722	7.02107	3.03453	4.1537	7.92165		SORBS3	3.55194	3.65416	4.53587	3.5373	5.11276	3.26984	3.27078	7.46291		SLC6A9	4.46943	3.61731	1.53725	0.183838	0.875392	1.41464	2.72524	9.02444
ST6GAL2	5.93579	10.9226	9.64449	0.113792	0.458723	1.74103	4.57199	2.03358		SREBF1	3.6474	7.12736	1.88049	2.44113	1.07055	6.00529	4.46696	12.0596		SP4	4.04105	7.75632	1.13199	0.189559	0.336101	1.3564	2.5729	1.76591		SP4	9.55546	4.77997	1.06805	0.071548	0.269675	2.15547	2.29804	1.84024		SLIT3	0.683465	0.811005	3.07177	0.123925	0.315903	1.73224	3.50622	2.51855
ST8SIA4	4.02299	5.57969	1.71431	0	0.112772	1.10063	2.13022	1.62411		ST6GAL2	8.27784	7.3537	8.23968	0.271069	0.365182	2.03758	4.39829	1.74932		SRD5A2	0	0	0	0	0	0	0	0		SRD5A2	0	0	0	0	0	0	0	0		SMARCC1	7.73515	2.53607	3.16702	0.57982	0.989747	1.46211	2.25132	4.87834
STK4	3.66272	2.51947	3.99901	0.120309	0.331882	2.0348	5.62552	2.62006		ST8SIA4	8.41172	3.25101	2.39865	0.599695	0.445485	1.34319	2.74372	0.873666		SREBF1	2.30293	7.08107	1.72805	2.16888	4.32199	5.88874	4.81702	11.471		SREBF1	3.30666	4.44905	3.64502	0.74065	4.73065	10.7424	5.17113	14.2779		SNAP29	7.42325	7.46147	11.8417	4.08535	8.99941	7.6827	13.339	9.89435
SULT6B1	0	0	0	0	0	0	0	0		STK4	4.96375	1.7219	5.45352	0.239818	0.336155	1.7005	6.51694	3.10306		ST6GAL2	4.1255	13.2349	1.67021	0.400307	0.909727	1.83401	3.8944	2.2869		ST6GAL2	8.16282	4.75251	4.28659	0.258468	0.755047	1.83319	3.35955	1.60991		SORBS3	4.61953	3.8255	3.27206	2.11611	3.36549	2.90854	2.88871	7.64924
SYN3	7.0883	3.6669	3.85268	0.0543	0.166237	1.79714	3.5989	1.62136		SULT6B1	0	0	0	0	0	0	0	0		ST8SIA4	4.02164	5.70109	0.996642	0.521852	0.498186	0.972345	2.40226	1.30829		ST8SIA4	5.32407	1.99648	1.67555	0.138238	0.19572	0.857102	2.67794	1.07851		SP4	4.65408	1.81862	2.40806	0.042302	0.089653	0.970284	2.60599	1.96325
TAAR1	0	0	0.152324	0	0	0	0	0		SYN3	6.82195	2.17503	3.41325	0	0.13761	1.55094	2.91494	2.00431		STK4	2.8511	2.36307	2.25324	0.088329	0.732109	1.55203	5.15612	3.74517		STK4	4.60887	1.38077	1.43629	0.146052	0.401858	2.23851	4.72719	3.36697		SRD5A2	0	0	0	0	0	0	0	0
TAAR2	0	0	0	0	0	0	0	0		TAAR1	0	0	0	0	0	0	0.06952	0		SULT6B1	0	0	0	0	0	0	0	0		SULT6B1	0	0	0	0	0	0	0	0		SREBF1	6.78073	5.12083	1.59356	0.639197	2.06144	3.5364	3.77451	14.9153
TAAR5	0	0	0	0	0	0	0	0		TAAR2	0	0	0	0	0	0	0	0		SYN3	4.53501	4.05044	1.04562	0.126194	0.912234	1.50715	1.35739	2.50252		SYN3	4.21574	2.02373	2.55941	0.03208	0.171569	1.32512	2.82547	2.25301		ST6GAL2	13.4089	3.4034	4.81531	0.295693	0.344248	1.59588	4.49223	2.26891
TAAR6	0	0	0.149677	0	0	0	0	0		TAAR5	0	0	0	0	0	0	0	0		TAAR1	0	0	0	0	0	0	0	0		TAAR1	0	0	0	0	0	0	0	0		ST8SIA4	2.17654	1.2799	1.64051	0.258884	0.2105	0.918835	2.42608	1.15093
TACC2	6.27333	6.76729	4.99812	0.131055	0.447326	2.73412	3.36625	1.68046		TAAR6	0	0	0	0	0	0	0	0		TAAR2	0	0	0	0	0	0	0	0		TAAR2	0	0	0	0	0	0	0	0		STK4	5.02231	1.07611	3.77191	0.19429	0.326489	1.20858	5.31458	3.15186
TACR3	0.759877	1.00937	0.110761	0	0.030026	0.055576	0.313435	0		TACC2	5.12971	5.41934	4.76741	0.370483	0.958473	2.58321	3.13681	2.34532		TAAR5	0	0	0	0	0	0	0	0		TAAR5	0	0	0	0	0	0	0	0		SULT6B1	0	0	0.063245	0.060506	0	0	0	0
TAP2	1.58196	1.35094	3.02964	0.531281	0.525084	2.41782	5.26796	5.63317		TACR3	0.552508	0.405026	0.147169	0	0	0.031343	0.302624	0.144853		TAAR6	0	0	0.049612	0	0	0.038396	0	0.05087		TAAR6	0	0	0	0	0	0	0	0		SYN3	9.75447	1.73716	2.12241	0.063053	0.176328	1.04568	2.59375	2.0094
TBP	10.098	9.9291	4.02931	0.551457	1.62706	3.68597	4.18774	3.50471		TAP2	1.19051	1.73251	2.67165	1.92906	1.0124	1.94387	3.52372	4.38802		TACC2	5.45076	6.05513	3.52026	0.257622	0.843315	2.4938	2.66278	2.37998		TACC2	6.14106	5.57035	3.63415	0.164347	0.900298	2.22974	3.34248	2.0311		TAAR1	0	0	0	0	0	0	0	0
TBX1	0.221007	0.104096	0	0	0.163392	0.159056	0.217619	0.388263		TBP	9.49656	10.5161	5.41222	1.26604	1.96314	3.10532	6.0838	3.0023		TACR3	0.437192	0.624025	0	0	0.035471	0	0.348843	0.182161		TACR3	0.600332	0.249947	0.270566	0	0	0.184082	0.35427	0.225512		TAAR2	0	0	0	0	0	0	0	0
TCERG1L	1.51935	1.10084	4.98654	0.106103	1.00998	2.10494	4.45356	3.19783		TBX1	0.067907	0.014589	0.034278	0	0.078861	0.076694	0.124163	0.182221		TAP2	1.28973	2.02221	2.22111	1.96693	1.75394	2.12365	2.80562	3.99626		TAP2	1.47844	0.782688	2.14216	0.830667	0.833128	2.86816	3.31427	4.05354		TAAR5	0	0	0	0	0	0	0	0
TDO2	0	0.039475	0.497465	0	0	0.189343	0.311894	0.240809		TCERG1L	1.08943	1.70895	5.21306	0.180272	0.584493	2.89108	3.95247	3.55995		TBP	9.49581	9.84192	3.90289	0.707286	2.10363	3.1607	4.55321	4.60532		TBP	8.03168	9.80231	4.16904	0.592976	2.5399	3.79335	4.09484	3.28215		TAAR6	0	0	0	0	0	0	0	0
TFAP2A	0.090243	0.024927	0.081715	0	0.074952	0.0803	0.102465	0.080196		TDO2	0.047102	0	0.284087	0.134815	0.292498	0.531221	0.283802	0.138494		TBX1	0.064139	0.253823	0	0	0.279767	0.086332	0.1285	0.269152		TBX1	0.192128	0.112767	0.210539	0	0	0.024145	0	0.30199		TACC2	5.98154	4.45639	3.78758	0.12301	0.478029	1.6905	2.89698	1.93695
TFAP2B	0	0.131908	0	0	0	0	0	0		TFAP2A	0.092426	0.102709	0	0	0	0.045597	0	0.141139		TCERG1L	1.98759	1.43427	5.19712	0.178912	1.00773	2.9732	3.49014	2.79985		TCERG1L	0.929052	1.06349	5.23883	0.062686	1.19592	1.82398	3.77956	3.13118		TACR3	0.047774	0.033168	0.072461	0	0	0.03009	0.318376	0.085695
TFRC	6.39488	7.57035	12.4918	0.795492	0.965958	4.65881	11.2577	11.7764		TFAP2B	0	0.034085	0	0	0	0	0	0		TDO2	0.046275	0	0.203289	0.24514	0.079655	0.415177	0.178574	0.143807		TDO2	0	0.081363	0.60968	0.082792	0.17	0.070158	0.2023	0.073124		TAP2	1.96671	1.305	2.03914	0.527834	0.815893	1.70945	2.92436	3.77366
TGFBR2	0.31697	2.43654	4.1521	0.243214	0.151306	2.86629	4.2575	3.99475		TFRC	8.55301	4.69919	18.3508	2.74869	1.77302	4.3228	12.5894	10.1978		TFAP2A	0.030822	0.09969	0.054542	0	0.012547	0.021249	0.061777	0.047568		TFAP2A	0.030291	0.053459	0	0.023546	0	0.091571	0.215549	0.160808		TBP	11.7763	9.76539	4.44534	0.571295	2.18722	2.64904	5.03661	2.98649
TGM2	1.58008	9.08983	3.78581	0.096133	0.482875	3.5854	7.25567	8.88181		TGFBR2	0.932549	2.08693	3.35591	1.53	0.418115	2.57816	4.47884	3.85051		TFAP2B	0	0	0	0	0	0	0	0		TFAP2B	0.040623	0	0	0	0	0	0	0		TBX1	0.12594	0.270732	0.028384	0	0.086007	0.046511	0.058478	0.170424
TH	0	0	0.594027	0.073251	0.351925	0.29446	0.481782	0.875985		TGM2	1.09395	5.17988	3.2575	2.15873	0.60474	2.99104	6.16293	9.53348		TFRC	5.30672	6.41926	6.73445	2.59565	1.44235	5.18164	9.96747	11.5204		TFRC	7.31412	3.88025	8.38349	0.733103	1.10623	3.76405	9.06491	9.89445		TCERG1L	0.364596	0.817161	3.84351	0.188102	0.90384	0.913419	2.72186	1.69095
TIMELESS	1.60903	0.954669	0.826259	0.154273	0.068596	0.30871	0.687838	0.634395		TH	0.035765	0.090138	0.625505	0.167445	0.113607	0.505937	0.386619	0.543153		TGFBR2	0.296457	2.13836	1.68973	0.915671	0.936932	1.91339	4.16211	3.79249		TGFBR2	0.739552	0.855109	3.36771	0.413847	0.513553	2.65159	5.04817	4.0989		TDO2	0	0.149476	0.325446	0	0.045058	0.382759	0.469302	0.137399
TNF	0	0	0	0	0	0	0	0		TIMELESS	0.904887	1.03101	0.795563	0.07602	0.057656	0.374457	0.628242	0.520709		TGM2	1.15302	6.5747	3.21666	1.12726	4.78708	2.48193	6.60981	9.29555		TGM2	1.7041	4.72089	4.17107	0.59397	1.40595	3.42081	8.61798	8.44797		TFAP2A	0.068077	0.04961	0.057486	0	0.044866	0.022504	0.027722	0.022801
TNFRSF1B	0.561205	2.41251	0.792622	0.125285	0.056086	0.393355	1.29014	1.44542		TNF	0	0	0	0	0	0	0	0		TH	0	0.260091	0.508976	0.138434	0.781509	0.261708	0.498259	0.469674		TH	0	0.062626	0.898516	0.012365	0.652463	0.425442	0.462931	0.560166		TFAP2B	0	0.032816	0	0	0	0	0	0
TNXB	0.541547	0.931633	0.866631	0.036433	0.064227	0.180063	0.357191	0.669288		TNFRSF1B	0.215182	1.01352	0.340838	0.493608	0.117239	0.761508	0.751572	1.38069		TIMELESS	0.937697	1.22711	0.61336	0.068872	0.337553	0.402128	0.505302	0.45797		TIMELESS	2.33244	0.511152	0.889346	0.082821	0.229025	0.450072	0.653269	0.475813		TFRC	3.79898	2.37271	10.8238	1.24757	0.869653	3.40178	12.0528	10.3127
TP53	3.1199	4.45939	1.22897	0.373929	0.382695	0.624696	0.56333	2.67745		TNXB	0.200834	0.445851	0.692544	0.128053	0.036842	0.237942	0.304868	0.517993		TNF	0	0	0	0	0.063869	0	0	0		TNF	0	0	0	0	0	0	0	0		TGFBR2	0.718502	0.59549	2.99321	0.507648	0.181327	3.96383	2.95526	4.0961
TPH1	0.114145	0.034395	0	0.029684	0.032574	0	0	0.204292		TP53	1.81616	4.58558	1.07345	1.4799	0.278331	0.568779	0.741606	1.77571		TNFRSF1B	0.270998	0.942797	0.347981	0.107145	0.328593	0.492719	0.744298	1.37761		TNFRSF1B	0.305215	0.86518	1.04664	0.223577	0.424212	0.656971	0.957848	1.04085		TGM2	2.71411	4.7646	3.17637	0.570632	1.21158	4.29017	4.19301	7.90825
TPH2	0	0	0.093161	0	0.051201	0.260137	0.118418	0.08278		TPH1	0.191073	0	0.071067	0	0	0	0.04414	0		TNXB	0.248311	1.0523	0.382313	0.068502	0.27233	0.265925	0.282717	0.609342		TNXB	0.323932	0.497424	0.581309	0.070933	0.09762	0.197548	0.227518	0.557236		TH	0.041289	0.029058	0.371031	0.061577	0.201655	0.28927	0.412386	0.667031
TPP2	5.3429	6.73952	3.10479	0.085957	0.212277	2.31194	4.43717	2.30837		TPH2	0	0	0.248415	0	0.111068	0.224774	0.551574	0.15491		TP53	2.05749	4.86779	0.683466	1.56915	1.03537	0.81452	1.62892	1.90137		TP53	4.58554	3.54545	1.35783	0.563342	0.455887	1.05766	1.49434	1.69594		TIMELESS	0.821417	0.625433	0.489495	0.076772	0.104509	0.316595	0.345322	0.527833
TRAF3IP1	6.65357	3.02628	8.88993	0.585298	1.52746	3.07906	4.93173	5.23032		TPP2	7.72668	5.19825	4.20488	0.622517	0.550039	1.67777	4.22147	3.04571		TPH1	0.106324	0.032736	0.035457	0	0.082123	0	0	0.030923		TPH1	0.280289	0.022376	0	0.029761	0	0.030173	0	0		TNF	0	0	0	0	0	0	0	0.055649
TREM2	0.462783	0.88909	4.61813	8.82794	8.40504	0.936315	2.93113	3.77027		TRAF3IP1	4.44833	2.53948	8.98498	1.3163	1.73173	3.40057	5.02865	5.65503		TPH2	0	0	0	0	0.09032	0.19184	0.565472	0.108462		TPH2	0.035007	0	0.113786	0	0.383779	0.181454	0.506842	0.109553		TNFRSF1B	0.469703	0.61996	0.511681	0.132186	0.112442	0.678653	0.576203	1.391
TSC2	14.2473	14.5617	7.74559	1.36987	2.26437	7.67947	9.49111	8.81959		TREM2	0.727934	1.08726	3.72236	7.18312	4.37673	1.2274	3.52656	3.2724		TPP2	7.23435	5.90619	2.52037	0.509431	0.815618	2.25991	3.57783	3.40519		TPP2	6.97709	4.67151	2.06309	0.245553	0.270976	2.30217	4.44244	2.90551		TNXB	0.147216	0.207543	0.354191	0.044697	0.054074	0.164124	0.253405	0.547972
TSPAN8	0	0.121905	0	0.121654	0.173024	0.207597	0.26678	0.047967		TSC2	10.1031	14.8613	7.29101	2.0848	2.17529	7.426	8.13665	8.54285		TRAF3IP1	4.52835	2.33036	4.88206	0.900361	1.1661	3.96948	4.38963	5.37785		TRAF3IP1	5.93905	2.41436	2.54608	0.555216	0.800183	3.06441	5.73164	4.57008		TP53	2.46058	2.90307	0.904625	0.515274	0.810113	0.571761	0.800266	1.89177
TTC13	4.06325	5.3244	2.45372	0.105752	0.3184	0.999223	3.6098	1.12776		TSPAN8	0	0.030821	0.089066	0	0.084165	0.122896	0.552009	0.631793		TREM2	0.454755	0.880497	2.60366	9.7329	11.2295	0.871151	4.37857	2.74479		TREM2	0.31581	1.44253	4.50723	6.68041	10.5882	1.46064	5.19236	4.67449		TPH1	0.013905	0.081179	0.03547	0	0	0	0	0.034688
TTR	0.15003	0.215045	1.21709	4.18338	0.143275	0	0.723407	2.58726		TTC13	5.06257	3.99047	3.52447	0.612429	0.690754	0.647753	2.39112	1.19578		TSC2	8.60159	15.1562	5.92117	1.3189	4.15716	5.75503	6.76963	8.50436		TSC2	12.1211	12.9081	7.49661	0.899202	3.17344	5.70039	9.48749	7.99208		TPH2	0	0	0.123146	0	0.000696	0.094995	0.507839	0
TXNDC5	5.5132	10.3156	12.3707	0.590956	1.15047	5.28732	8.45822	7.76386		TTR	0.158528	0.201434	0.36349	5.07846	3.23931	0	1.30121	0.257288		TSPAN8	0.159411	0.065109	0.462725	0.309781	0.481598	0.164478	0.860922	0.527408		TSPAN8	0	0	0	0.382622	0.290821	0.295993	0.675786	0.195726		TPP2	3.47629	3.50006	3.46278	0.287179	0.467895	1.20703	4.24614	3.01426
TXNRD2	2.02486	5.40997	6.57192	1.55261	4.24572	6.82768	5.15672	5.17863		TXNDC5	6.38554	9.50402	10.2129	1.38224	2.57387	4.63855	7.87433	7.65747		TTC13	5.7452	5.08397	2.44581	0.268345	0.586505	1.29915	2.00088	1.32951		TTC13	3.99546	3.94325	2.22805	0.25838	0.874832	1.30031	2.31491	1.47029		TRAF3IP1	2.35672	1.37829	5.60525	0.712902	0.699316	2.10299	3.99437	3.9316
TYR	0	0	0	0	0	0	0	0		TXNRD2	1.84991	5.34712	6.2344	2.85771	4.50829	5.72284	5.00602	4.78937		TXNDC5	6.38929	10.8232	7.35948	1.89341	3.33785	4.09126	7.43124	8.01173		TTR	0.201436	0	2.30029	2.0504	10.4502	0.076638	2.73245	0.079335		TREM2	0.829109	0.920278	2.31017	6.37638	11.3514	1.95089	3.18974	3.01462
TYRP1	0.051372	0.057148	0.347525	0.058685	0.219237	0.936227	1.85001	0.398992		TYR	0	0	0	0	0	0	0	0		TXNRD2	2.32103	5.51323	5.96397	2.12631	6.34018	4.93095	4.25846	4.70699		TXNDC5	6.18264	7.15142	9.99071	0.685476	3.46753	5.57396	7.23491	8.66436		TSPAN8	0	0.179783	0.349871	0.082489	0.301174	0.116389	0.350995	0.463682
UBE2L3	11.7631	18.7046	12.5548	2.78949	10.7169	13.2073	13.6794	12.1695		TYRP1	0.035718	0.029334	0.315849	0	0.226919	0.773803	2.30426	0.693008		TYR	0	0	0	0	0	0	0	0		TXNRD2	2.37005	5.31065	8.79578	0.95074	8.23362	4.96422	4.7978	4.17343		TTC13	3.55907	3.54246	3.06224	0.171923	0.338907	0.987435	2.04909	1.63643
UCP2	1.79964	5.23857	1.5587	2.36996	2.31545	2.55743	3.60767	1.5047		UBE2L3	11.2156	16.3956	16.144	6.62868	9.29903	13.3066	17.1555	15.1515		TYRP1	0	0.171998	0.284766	0	0.796424	0.464303	1.77427	0.55609		TYR	0	0	0	0	0	0	0	0		TXNDC5	12.5533	6.68719	7.69312	0.83498	1.51982	4.0281	6.62552	8.03625
UFD1L	7.82135	13.3237	6.16912	7.69426	12.5092	6.49098	6.81153	6.40213		UCP2	1.0959	7.45165	0.832599	3.63269	1.90761	2.79743	2.4468	2.30647		UBE2L3	14.583	14.3039	16.7368	3.3011	10.8337	16.519	16.6674	16.2945		TYRP1	0.141753	0.091919	0.467068	0	0.520958	1.12731	2.63076	0.6873		TXNRD2	5.26276	6.23724	5.52676	1.48506	4.3421	4.89051	4.22854	4.26986
UGT1A1	0	0	0	0	0	0	0	0		UFD1L	8.60443	15.4639	7.16289	8.12207	7.06618	7.72445	7.58655	7.73462		UCP2	2.36419	6.91532	2.26759	3.12132	3.44882	2.85653	2.33368	1.94454		UBE2L3	14.7844	15.3639	8.44162	4.23672	9.58372	13.7365	13.2419	15.3281		TYR	0	0	0	0	0	0	0	0
UHMK1	1.04558	1.32995	6.86214	0.368528	0.509645	10.4331	19.3296	6.63239		UGT1A1	0	0	0	0	0	0	0	0		UFD1L	11.42	13.5311	9.12361	6.80178	15.5842	7.04922	8.59654	7.02429		UCP2	2.80986	5.07929	3.84049	2.26847	2.06616	2.78597	3.00576	2.9314		TYRP1	0.101416	0.028628	0.679526	0.122993	0.220159	0.607184	2.38073	0.672097
UHRF1	0.238798	0.419865	0.178284	0	0	0.04438	0.431994	0.122574		UHMK1	2.37453	0.390344	7.28962	0.507816	0.635716	9.0081	19.1552	5.24109		UGT1A1	0	0	0	0	0	0	0	0		UFD1L	10.0321	15.5367	7.69166	6.0697	18.7852	6.92232	5.66605	6.94667		UCP2	2.70181	7.02081	2.15036	1.38117	2.84453	3.52245	2.21952	3.02431
UNC5C	0.861656	1.2174	1.25671	0.113024	0.134487	1.30295	2.37107	1.36663		UHRF1	0.279954	0.37504	0.04177	0.010843	0	0.054848	0.088444	0.123122		UHRF1	0.161197	0.591529	0.024837	0	0.014894	0.016129	0.059159	0.121501		UGT1A1	0	0	0	0	0	0	0	0.028228		UFD1L	8.86039	16.4949	7.90448	7.33171	14.6208	8.87786	6.95961	6.55971
USP46	7.86754	13.2415	15.5379	0.325999	0.181544	12.5022	18.6573	8.42516		UNC5C	1.61386	0.934017	1.11303	0.058256	0.188166	1.01777	1.92575	1.84087		UNC5C	0.438788	1.01024	0.234914	0.038567	0.474752	1.35904	2.04575	2.45198		UHMK1	1.85961	0.189702	3.62817	0.174182	0.332754	7.26179	16.1662	6.88553		UGT1A1	0	0	0	0	0	0	0.032353	0
VDR	0	0	0	0	0.032171	0	0.150848	0		VDR	0	0	0	0	0	0.068551	0.156551	0.066527		VDR	0	0	0	0	0.038525	0.078401	0.094237	0		UHRF1	1.22119	0.225811	0	0.011869	0	0.070457	0.103655	0.128004		UHMK1	0.364654	0.204404	5.13813	0.05396	0.205401	7.86087	16.6635	5.42431
VIPR1	0.173196	0.066976	6.35307	0.055765	3.06069	7.71691	8.71627	4.8197		VIPR1	0.165745	0.034378	7.49885	0.372148	1.8538	7.45258	9.47942	5.2055		VIPR1	0.082252	0.09736	4.64921	0.382082	3.04597	5.41506	6.56036	5.53458		UNC5C	1.17653	0.574684	0.496176	0.134079	0.317599	2.77546	1.58924	2.59356		UHRF1	0.619271	0.208133	0.03747	0.040998	0	0	0.094376	0.108816
VIPR2	0.01938	0.02004	0.842938	0.299599	0.393213	1.0298	0.928869	0.16516		VIPR2	0.054875	0.067248	1.59881	0.339078	0.334547	0.965381	1.09086	0.275959		VIPR2	0	0.060865	0.539752	0.275069	0.700279	0.714932	0.543313	0.473111		VDR	0	0	0	0	0	0.033021	0.151302	0		UNC5C	2.79312	0.654187	0.524359	0.114208	0.097417	0.785636	1.62999	2.75264
VLDLR	11.5761	11.5092	7.91006	0.207751	0.494902	4.67181	6.63957	2.8356		VLDLR	14.2731	11.138	8.46477	0.326235	1.13478	4.2813	6.40134	4.41042		VLDLR	11.1788	10.2973	5.00803	0.273823	1.53645	4.50822	5.32227	4.6071		VIPR1	0.158834	0.035909	6.73694	0.179008	5.6998	5.41696	7.49895	4.29669		VDR	0	0	0	0.077384	0	0	0.08052	0
WNT2	0.07785	0.353355	0.285836	0	0.129841	1.74693	3.29358	0.499236		WNT2	0.150087	0.133357	0.282277	0	0.168086	1.4011	2.67432	0.794622		WNT2	0.106356	0.129437	0.136354	0	0.090918	0.701037	1.12338	1.16295		VIPR2	0.006425	0.016301	0.62286	0.119436	0.456406	0.478739	1.59638	0.305262		VIPR1	0.042449	0.009068	3.98636	0.24933	2.33042	3.4202	6.69437	3.78917
WNT2B	1.14669	0.172721	1.89027	0.072829	0.580226	0.766209	0.964995	0.86613		WNT2B	0.80447	0.58644	0.939455	0.212415	0.814381	0.830142	1.43858	1.4656		WNT2B	0.728401	0.183443	0.269432	0	0.431289	0.272679	0.825628	1.59945		VLDLR	11.1746	9.07599	3.62833	0.259267	1.06587	5.07793	6.21853	5.1691		VIPR2	0.038955	0.054909	0.900893	0.128515	0.391019	0.453044	0.75793	0.294298
WNT5A	0.653616	1.09482	0.734644	0	0.035089	0.1701	0.223719	1.32934		WNT5A	0.386225	0.631093	0.38464	0	0.10241	0.410438	1.25813	1.0529		WNT5A	0.095023	1.07195	0.213357	0	0.247588	0.198775	0.86394	1.05983		WNT2	0.103808	0.278591	0.174559	0	0.475198	1.90504	1.45659	0.541929		VLDLR	10.4405	5.40056	4.84175	0.400882	1.2104	3.06612	6.04874	4.41039
WNT7B	0.974729	3.13299	3.16323	0.382158	0.300292	1.11438	1.61799	6.67882		WNT7B	1.34231	2.86507	2.28172	0.959112	0.05022	1.60827	1.54528	4.02175		WNT7B	0.709823	3.3279	2.67914	0.558294	0.817529	1.10899	1.07089	3.79493		WNT2B	0.758941	0.451603	0.928202	0.085474	1.22071	0.626339	1.13072	1.56264		WNT2	0.179933	0.191429	0.365148	0	0.506058	0.662147	1.95904	0.442298
WNT8A	0.209103	0	0.144448	0	0.039694	0.017993	0	0		WNT8A	0.025136	0	0.290522	0	0	0	0.200486	0		WNT8A	0.054484	0.044205	0.096414	0	0.093784	0.075124	0.058137	0.084658		WNT5A	0.517414	0.751824	0.882334	0	0	0.251624	1.34587	0.959152		WNT2B	1.82495	0.293343	0.970213	0.145417	0.96654	0.986982	1.02309	1.77098
XBP1	3.90261	9.83187	13.3677	3.24885	10.7422	14.282	13.3856	6.44801		XBP1	4.82731	10.7658	10.53	5.50235	10.4254	12.8559	12.9088	8.50797		XBP1	5.20958	9.33544	11.2576	5.12615	13.2922	8.95572	10.7796	8.56322		WNT7B	0.948884	1.84576	2.88226	0.326688	0.61091	0.732099	1.6171	3.02424		WNT5A	0.200684	0.277082	0.703751	0	0	0.175821	1.14703	0.608571
XRCC1	13.0395	9.31933	6.37643	1.31027	2.82177	5.28231	6.45822	5.28016		XRCC1	8.31306	9.45449	7.64417	2.18751	2.47275	4.53395	7.19382	6.73173		XRCC1	11.0599	9.56541	5.85876	2.38684	4.59504	4.50586	4.89942	6.2049		WNT8A	0.108557	0.140787	0	0	0	0.216929	0.117483	0.042177		WNT7B	14.9428	9.7733	2.80548	0.577209	0.74869	1.38705	1.16338	4.92022
ZBED4	11.1819	10.1493	3.26547	0.081264	0.038636	0.747858	1.7288	1.63037		ZBED4	9.81596	7.93601	3.16619	0.158727	0.192026	1.08007	1.61255	1.32239		ZBED4	7.73515	10.6815	1.45338	0.223355	0.325029	0.846854	1.26812	1.72213		XRCC1	13.4345	9.64271	6.18336	1.34615	4.58776	4.90735	7.43225	6.02201		WNT8A	0.063157	0.087695	0.14369	0	0	0	0.148353	0.040305
ZBTB20	0.375186	0.230201	0.20889	0	0.094378	0.343914	0.61118	1.3537		ZBTB20	0.181752	0.139602	0.508847	0.041743	0.19654	0.25966	0.265826	1.05762		ZBTB20	0.103634	0.310198	0.069239	0.050348	0.179593	0.322237	0.448686	1.91439		ZBED4	12.1832	6.04729	1.34016	0.032007	0.06032	0.90065	2.0229	1.36945		XBP1	3.03459	9.96612	12.1543	4.24853	12.7274	11.9637	13.9996	7.89184
ZBTB9	7.26667	5.32614	3.28637	0.053445	0.700869	2.4564	3.90809	3.72315		ZBTB9	3.92225	5.3578	3.73035	1.11291	0.661424	1.68098	3.15401	2.51677		ZBTB9	4.68812	4.93882	2.18447	0.233681	0.837885	1.84431	2.27919	2.81295		ZBTB20	0.639693	0.022622	0.337883	0.025252	0	0.406602	0.445422	1.85452		ZBED4	14.6835	4.95799	1.73896	0.056772	0.12032	0.53947	1.77823	1.6424
ZCCHC4	1.61839	1.29029	0.411565	0.235302	0.16225	0.557157	0.597029	0.846389		ZCCHC4	1.74772	0.9902	0.72377	0.414442	0.473012	0.677884	1.08221	0.798086		ZCCHC4	1.04044	1.0484	0.489499	0.855819	0.297198	0.634496	1.11075	0.830103		ZBTB9	6.44446	4.41363	1.71048	0.10329	0.623306	2.20416	3.16365	2.61116		ZBTB20	0.150165	0.208226	0.301324	0	0.094927	0.235943	0.167906	1.87516
ZDHHC8	8.19921	7.60298	13.3639	1.02994	5.82912	13.4433	18.3226	11.1144		ZDHHC8	4.45631	9.48491	16.0764	2.97896	3.73132	13.0203	13.5391	10.3725		ZDHHC8	2.34271	9.49815	9.35831	1.12068	7.84326	9.40641	8.76213	11.1933		ZCCHC4	1.44934	0.874365	0.520753	0.355103	0.255552	0.879465	1.02193	1.327		ZBTB9	6.42739	3.07163	2.46759	0.324645	0.546007	1.30293	2.04806	2.70443
ZIC2	0.818458	4.79259	2.53072	0.273173	0.241606	0.940016	2.68432	5.02685		ZIC2	0.546755	5.14112	2.64702	1.17707	0.650987	1.16644	1.40722	2.33759		ZIC2	0.459908	3.79714	1.56096	0.991857	1.15577	1.03212	1.90281	2.27779		ZIC2	1.08902	2.0523	4.24677	0.223909	0.474612	1.66654	2.19037	2.30463		ZCCHC4	0.66134	0.541708	0.523541	0.102956	0.389461	0.992766	0.974619	1.04623
ZNF181	3.42434	3.53838	1.17234	0.485323	0.440934	1.75098	2.12907	1.75019		ZNF181	4.85444	3.94618	2.24398	1.0919	1.32142	1.60739	3.47758	2.65653		ZNF181	4.67107	4.1448	1.7124	1.17857	0.73273	2.13681	3.77545	2.15389		ZNF181	5.38449	2.86999	1.27002	0.902913	0.837639	2.91691	2.44649	2.81487		ZDHHC8	11.6526	9.47435	8.66727	0.984038	4.42735	5.98879	9.99147	10.7354
ZNF471	7.20288	1.95438	0.886294	0	0.089042	0.747825	1.32637	2.06754		ZNF471	10.5929	1.21834	1.62145	0.148184	0.129939	0.674887	1.82839	1.37526		ZNF471	7.05795	2.55095	0.892018	0.210935	0.288465	1.65576	2.47962	2.4253		ZNF471	6.90013	1.21074	1.10291	0.123564	0	1.51064	1.84208	2.08948		ZIC2	0.517304	2.55574	1.54165	0.557579	0.482019	0.983782	0.836973	2.87253
ZNF490	3.3757	2.40575	1.85784	0.098327	0.137743	0.987628	1.49819	1.17707		ZNF490	4.19512	1.31088	1.89806	0.173164	0.204126	1.05419	1.92533	1.0648		ZNF490	2.01229	2.0655	1.26555	0.351266	0.280031	1.08014	1.40803	1.67495		ZNF490	3.43512	0.73539	0.971806	0.095709	0.13281	1.17673	1.88775	1.54766		ZNF181	2.42373	2.54661	2.46796	0.518046	0.974394	2.59099	3.62092	2.25542
ZNF74	18.8718	17.4941	7.95473	0.559573	1.52468	2.9718	4.95412	4.76088		ZNF74	12.8873	18.6271	8.0642	0.97395	1.16985	3.4665	3.56552	3.05485		ZNF74	12.0278	19.9018	4.75106	0.767365	2.22357	2.96263	3.46375	3.39539		ZNF74	15.5127	14.3986	8.66848	0.410514	2.77487	3.08713	4.48925	3.09691		ZNF471	3.59083	0.6465	1.61782	0.129637	0.044628	0.467946	2.0303	1.86677
ZNF804A	6.5472	9.31223	3.49844	0.433613	0.170057	2.78892	3.02851	1.90134		ZNF804A	5.74426	6.40045	4.73581	0.375035	0.650893	2.80522	4.64174	2.00265		ZNF804A	3.39347	4.72881	3.11189	0.328827	0.5757	3.2192	3.68909	2.45791		ZNF804A	10.4493	7.88543	3.82748	0.256389	0.288726	2.7236	3.47045	2.18337		ZNF490	0.874383	0.515835	1.49071	0.124997	0.100954	0.3945	1.51041	1.23057
CD38	0	0.152088	0.796192	0.297496	0.142014	0.104927	0	3.72679		CD38	0.012933	0.104799	0.449226	0.33481	0.18807	0.101288	0.568768	1.73058		CD38	0.070414	0.459827	0.693041	0.632441	0.162593	0.043809	1.1362	1.81929		CD38	0.250654	0.110216	0.242411	0.185805	0.233441	0.188148	0.766575	2.31737		ZNF804A	3.93668	5.33621	4.05225	0.419862	0.362074	1.61	4.24125	2.00838
ENKUR	1.14439	0.909656	3.71509	2.88632	2.5339	2.50376	1.87831	3.99464		ENKUR	1.62339	1.38259	5.24343	4.40733	3.6956	3.42747	2.64576	3.4032		ENKUR	2.92868	1.11911	4.14771	4.5964	3.49473	2.95199	4.80946	3.7651		ENKUR	1.30798	0.795866	2.32824	3.30852	3.54075	2.07346	2.22363	3.31586		CD38	0.146325	0	0.455955	0.261275	0.368739	0.392476	0.36249	1.64018
GATC	8.68552	8.09034	14.0174	0.827363	2.98643	4.8639	12.7872	4.79608		GATC	4.75064	3.8315	10.0559	2.0124	1.61367	3.9743	13.7513	5.81662		GATC	2.31452	6.18024	3.62627	1.40854	4.21859	3.86197	8.13213	7.60731		GATC	7.35669	3.46509	7.38626	0.542301	4.72067	4.13666	13.6829	7.64522		ENKUR	0.802369	0.95865	5.92134	1.89233	6.251	3.42816	2.13083	3.1132
GJC2	0.448611	1.23244	2.85069	0.250822	4.41343	4.26974	12.1352	9.40327		GJC2	0.263741	1.1715	5.3045	1.92819	3.70709	6.59255	8.72853	15.572		GJC2	0.227759	1.07179	1.73116	1.52439	10.2936	5.2902	8.47396	14.5824		GJC2	0.303518	0.915812	5.83343	0.469353	10.1601	14.0392	10.8582	18.0716		GATC	4.19229	0.79503	6.10243	0.402419	3.75819	4.30137	9.67808	6.89493
GPR109A	0.154985	0.14347	0	0	0.038565	0	0.178388	0		GPR109A	0.053151	0.088497	0.039593	0	0	0	0.064928	0		GPR109A	0	0.085896	0.047154	0	0.041249	0.036494	0.112968	0		GPR109A	0	0.046219	0	0	0	0	0	0.041539		GJC2	0.960064	0.861734	1.49674	0.302724	3.67653	4.18882	6.51665	18.5025
GSC2	0	0.222436	0	0	0.0671	0	0	0		GSC2	0	0	0	0	0	0.061278	0	0		GSC2	0	0	0	0	0	0	0	0		GSC2	0	0	0	0	0	0	0	0		GPR109A	0	0.042601	0.138346	0	0.038789	0	0	0
HTT	4.61148	4.07001	9.21236	0.204472	0.65973	7.03495	8.88978	5.18028		HTT	5.38195	2.56924	8.26559	0.485791	0.886428	6.48318	8.47175	5.20812		HTT	3.45163	4.10074	4.14518	0.220742	1.68575	5.94668	7.33456	6.98498		HTT	4.94456	1.82206	4.83141	0.106873	0.951979	5.05167	10.1096	6.22174		GSC2	0	0	0.082076	0	0	0	0	0
INPP5J	2.80861	2.64567	6.26018	0.314895	2.56928	6.08581	6.27035	4.1592		INPP5J	1.96643	3.69836	5.2048	1.46677	2.05396	5.69434	5.92093	4.14707		INPP5J	1.83441	3.61012	4.39727	0.484901	3.80454	4.78434	3.60329	4.61026		INPP5J	1.76907	3.05558	7.79222	0.276554	5.08993	4.06492	4.29611	4.03348		HTT	6.22018	1.50987	5.58145	0.258711	0.593926	5.0937	7.16804	5.43783
MED15	7.53806	8.3239	7.65708	0.614104	1.78168	7.90101	9.20555	7.18718		MED15	4.60442	9.76823	7.8463	1.47234	2.42792	7.87147	7.91848	7.2414		MED15	4.63457	8.66747	5.66961	0.985436	3.50752	6.1939	6.34009	7.68785		MED15	5.10861	7.37431	8.25235	0.429593	2.77576	6.32064	8.00169	7.4214		INPP5J	4.92262	3.51799	4.11944	0.278393	2.33726	3.25978	4.84464	3.86096
NGF	0.583336	0.708962	2.0376	0.110154	0.679471	0.900686	1.48801	1.56078		NGF	0.400104	1.27202	2.50355	0.865825	0.76256	0.675829	0.768797	0.456967		NGF	0.239081	0.375722	1.20687	0.173703	2.81773	0.759541	0.758447	0.495319		NGF	0.762823	1.60042	2.37558	0.543728	1.58649	0.773932	0.171844	0.192684		MED15	11.4573	7.45752	5.90834	0.337402	1.99709	3.6642	6.46992	7.32504
TRMT2A	7.46773	6.15733	5.53973	1.6066	5.81399	4.67192	7.42191	6.41341		TRMT2A	3.95991	7.00781	5.50611	3.49515	3.41615	4.2138	4.9366	5.67146		TRMT2A	3.85805	8.01477	4.21224	2.3209	7.06343	3.37157	3.75152	5.68543		TRMT2A	5.71184	5.27475	5.96249	1.52643	10.5104	3.36791	5.63026	6.0615		NGF	1.48558	1.20212	0.925915	0.277408	1.1072	0.635327	0.494872	0.49394
TSKU	8.19257	12.6817	2.28329	1.29481	0.758301	1.97538	0.917181	1.6249		TSKU	5.42421	14.1298	1.49195	1.68761	0.231486	1.13927	1.17201	1.19435		TSKU	3.10926	10.2865	1.83865	1.64956	1.30858	0.905204	0.947374	1.31153		TSKU	4.93615	9.18553	3.24514	0.46888	1.1998	1.11333	1.40847	1.39745		TRMT2A	13.9447	7.27122	4.2733	2.46896	4.50317	3.67793	4.99162	5.68392
ZNF831	0	0	0.275043	0.037803	0	0.266016	0.491501	0.326708		ZNF831	0	0	0.441471	0	0.012016	0.256031	0.370699	0.182591		ZNF831	0	0.018466	0.183711	0	0.019722	0.323316	0.415501	0.213147		ZNF831	0.009717	0	0.312557	0	0	0.17969	0.481415	0.133281		ZNF831	0	0	0.133659	0	0.016791	0.132937	0.344575	0.203298
[truncated: 52 more columns]

## Sheet: Highly expressed genes
Supplementary Table S3b. List of 212 highly expressed Schizophrenia genes identified.
2011-09-05
ADRA2A
AGPAT1
AGT
AK1
AKT1
APC
APOD
APOE
APP
AQP4
ATF4
ATN1
ATP2B2
ATP6V1G2
AZIN1
BASP1
BAT1
BLOC1S1
BSG
CALM1
CALY
CANX
CAP2
CCK
CDK5
CHGA
CHGB
CHRM1
CLDN5
CLU
CNP
CNTN1
COX6A1
CPLX1
CPLX2
CSNK1E
CSPG5
DBI
DGCR6L
DLG4
DPYSL2
DYNLL1
EGR1
ENO1
ENO2
ESD
FABP3
FABP7
FEZ1
FKBP1A
FXYD1
FXYD6
FYN
GABBR1
GABRA1
GABRA5
GAP43
GAPDH
GFAP
GLUL
GNAO1
GNAS
GNAZ
GPM6A
GPX1
GRB2
GRIA2
GRIN1
GRM3
GSTO1
GSTP1
HK1
HSPA5
INA
KIF5A
L1CAM
MAG
MAL
MAP1A
MAPK8IP2
MAPT
MBP
MDH1
MIF
MLC1
MOBP
MPPED1
MT-ATP8
MT-CYB
NCAM1
NDRG1
NDUFV2
NEFL
NEFM
NPTN
NPY
NRGN
NRN1
NTRK2
PAFAH1B1
PCDHGC3
PEA15
PENK
PGD
PHGDH
PIK3R2
PIP5K2B
PLP1
PPP1R1B
PPP2R2B
PPP3CA
PPP3CB
PRNP
PSAP
PTGDS
QKI
RASL10A
RGS4
RTN4
S100B
SHISA5
SLC17A7
SLC1A2
SLC1A3
SNAP25
SNCG
SPARCL1
SPP1
SPTAN1
SREBF2
SST
STX1A
SULT4A1
SYN2
SYNGAP1
SYNGR1
SYP
SYT11
TCP1
TF
TMEM108
TSPO
TUBA1A
VAMP2
VGF
YWHAB
YWHAE
YWHAG
YWHAH
YWHAZ
CHL1
CLDN11
OMG
PMP22
SAT1
KCNJ10
MSRB2
PLLP
RBP1
TTR
GSN
LSM2
MOG
MRPL38
PIP5K2A
PTPRZ1
RPP21
CAPZA2
DDR1
NR4A2
NTNG2
PPP3R1
RTN4R
CNTN2
COMT
FGF1
NTS
UGT8
CNR1
CTNNA1
DLX1
GABRG2
HSPA1A
HSPA1B
PRKCG
SFRP1
ADORA2A
BAT2
DRD2
PDYN
SOX10
ALDH1A1
C1QTNF3
CHN2
CYP26B1
DBP
DGCR6
EGR4
GABRA6
GRIA1
GRM4
HOMER3
INPP5A
NGFR
NR1D1
PAX6
RELN
SLC1A6
TECR
WNT7B
ZIC2
