# Supplementary material for: Expression Profiling of Autism Candidate Genes during Human Brain Development Implicates Central Immune Signaling Pathways
Source: PLoS One. 2011 Sep 15;6(9):e24691. doi: 10.1371/journal.pone.0024691 (PMC3174192; doi:10.1371/journal.pone.0024691)
Supplement: Table S4 — Expression heat map of CarpeDB genes. (XLSX) [file pone.0024691.s013.xlsx]

## Sheet: "Heatmap"
Supplementary Table S4a. Epilepsy gene expression "heat map" of all genes in CarpeDB.
	Dorsolateral Prefrontal Cortex										Ventrolateral Prefrontal Cortex										Medial Prefrontal Cortex										Orbitofrontal Cortex										Posterior Superior Temporal Cortex
	21wg	24wg	4mo	6mo	4yr	11yr	15yr	23yr			21wg	24wg	4mo	6mo	4yr	11yr	15yr	23yr			21wg	24wg	4mo	6mo	4yr	11yr	15yr	23yr			21wg	24wg	4mo	6mo	4yr	11yr	15yr	23yr			21wg	24wg	4mo	6mo	4yr	11yr	15yr	23yr
IDS	40.3513	89.5976	249.722	15.6965	28.2663	221.742	333.849	189.498		PRNP	72.0932	63.3191	269.96	31.6983	57.3182	151.941	340.976	175.397		S100B	15.8136	10.1252	150.981	402.691	703.306	141.105	290.678	298.97		IDS	46.3193	42.4304	191.69	10.7988	45.2142	174.335	333.263	139.423		IDS	50.0961	26.487	244.033	15.7854	57.663	273.727	369.34	119.573
S100B	9.43453	9.29633	130.931	373.718	494.527	100.365	128.492	356.986		S100B	8.56789	7.99768	112.413	374.457	394.456	107.954	191.341	364.085		PRNP	64.1527	86.5573	171.617	22.131	61.8484	145.621	290.289	204.32		S100B	13.2176	11.8217	65.8928	360.039	588.159	162.685	148.412	340.684		S100B	10.5019	11.66	184.004	334.777	761.806	154.661	180.141	285.544
APOE	16.9447	63.6002	344.492	841.132	664.72	214.342	178.583	1056.36		TUBA1A	2792.42	9078.28	813.642	372.453	691.718	844.781	421.113	461.726		APOE	9.79926	66.7741	233.958	771.341	1050.56	174.741	202.419	542.435		APOE	16.697	57.1058	534.87	614.423	1257.25	228.999	204.086	609.146		PRNP	129.118	46.883	176.868	11.6087	36.7041	100.596	289.474	191.988
PRNP	61.5532	73.7165	235.295	10.4364	26.6529	178.968	375.455	192.898		AF347015.2	1418.98	1012.63	7960.26	27049.7	10556.7	18799.8	10507.1	15696.8		TUBA1A	4024.01	7433.67	1341.93	222.188	975.817	759.046	466.814	413.725		TUBA1A	3127.1	8920.97	709.328	194.726	1032.76	919.989	357.952	471.926		APOE	20.6463	74.376	222.62	525.846	771.352	372.72	104.257	578.881
TUBA1A	2550.68	8566.39	828.879	220.461	987.563	909.414	348.265	206.187		ATP6AP2	41.7557	65.6834	109.164	10.7568	33.1738	73.8158	106.399	65.5854		AF347015.2	1949.2	1021.85	10978.6	30521.1	9837.44	18421.2	12602.7	13588.3		DPYSL2	195.05	228.101	68.3859	1.80422	5.97606	114.502	148.153	132.682		TUBA1A	4055.93	7164.51	1069.68	269.578	878.651	682.198	599.916	477.757
AF347015.2	1304.18	1010.73	9517.27	24245.5	7358.54	18251	10204.8	13299.1		ATP1A2	7.6866	10.7196	30.1482	15.9273	5.43819	29.2478	30.0545	141.22		ATP1A2	6.16416	15.9239	23.7317	11.1964	5.76635	26.7883	47.2598	163.525		AF347015.2	1711.16	1005.84	11229.1	34270.3	8489.2	19157.8	10224.1	12930.5		AF347015.2	1612.23	1211.64	9120.99	20872.3	13022.9	24318.4	16148	16820
ATP6AP2	29.5531	62.5765	89.157	4.68196	11.3355	77.7264	114.147	53.9467		ZEB2	110.307	76.1914	29.2255	3.09497	4.02023	16.7852	30.0247	31.2473		SLC1A3	11.4382	30.7935	31.8035	34.1634	6.15034	27.3914	78.2177	237.854		ATP6AP2	41.195	56.7579	70.3029	4.67029	30.0922	77.4444	105.873	62.2191		ATP6AP2	35.4983	50.3691	95.2551	5.39993	18.3057	52.8019	116.48	65.5543
ATP1A2	6.73471	13.5881	34.7133	2.73467	2.43849	24.8259	29.3172	200.107		GABRA1	3.86904	4.93109	51.67	1.13854	5.48793	32.2829	109.036	27.3653		PCMT1	58.3386	50.0712	85.3081	9.90687	42.6483	93.3689	113.504	84.6782		ATP1A2	13.7717	7.08149	29.1653	3.3554	4.0431	23.817	32.825	159.888		ATP1A2	8.03074	4.20373	29.7866	3.86228	4.09315	28.5078	25.7742	157.947
ZEB2	103.162	116.417	29.4736	1.80892	2.04559	15.2569	31.5469	29.016		SLC1A3	13.3658	16.1109	38.7247	47.5698	6.79131	33.7699	43.7612	198.114		NPY	21.3756	24.207	148.905	26.0932	313.074	22.2441	69.6469	24.317		HAX1	24.2584	40.2005	28.0044	20.5922	108.683	40.0315	31.4902	28.1927		GABRA1	1.06005	1.23175	41.2047	0.785075	2.79827	22.6595	105.639	23.4953
SLC1A3	12.095	19.1454	40.1702	6.89977	3.09652	24.1736	37.1537	369.267		GABBR1	41.9469	62.0628	109.35	30.7781	16.833	94.7106	84.8863	66.7345		DPYSL2	171.297	348.373	51.8673	4.77811	22.7827	96.3073	122.427	127.056		ZEB2	112.886	58.4017	16.11	1.60575	1.80615	35.4797	30.8195	44.0972		SLC1A3	10.0267	7.94118	37.919	11.7887	5.52557	35.8067	38.7117	209.914
GABBR1	47.5685	55.2435	100.483	13.3798	17.3127	105.529	97.234	80.8588		PCMT1	54.9666	53.5173	104.224	13.5235	48.4667	101.44	142.872	71.4383		GRIN1	31.0885	48.1039	106.576	2.91221	37.8043	93.0388	79.7032	106.371		SLC1A3	35.8872	18.3901	31.8523	9.75812	5.22673	27.4555	41.5638	238.457		PCMT1	67.8008	55.7766	91.5164	7.97647	35.1309	85.5033	125.945	60.122
PCMT1	42.2806	52.3854	80.3701	7.37016	38.4651	111.001	140.632	59.205		NPY	30.773	52.5625	142.614	48.8006	82.4881	10.3374	59.2853	16.6867		STXBP1	61.2737	76.4405	95.121	2.69067	29.3841	75.0301	112.117	96.1726		GABBR1	46.0695	55.4431	104.133	15.0345	35.1503	79.5388	89.6072	68.5748		NPY	283.474	299.499	123.545	25.1661	141.049	7.23991	34.6232	41.7215
NPY	20.2626	29.3175	85.8365	36.4325	178.032	13.7708	41.2551	38.3044		DPYSL2	211.974	339.103	101.668	6.91377	11.868	83.7123	140.287	105.178		ATN1	49.4077	117.095	46.9133	11.4827	24.8181	43.5651	42.0762	57.3491		PCMT1	53.7528	55.8209	63.1878	5.26226	52.9436	93.9505	117.884	71.3369		DPYSL2	355.131	156.986	51.1284	2.46767	5.06356	44.8515	113.666	123.054
DPYSL2	203.344	385.101	91.142	3.12602	5.13975	90.0606	171.307	90.1116		GRIN1	29.8069	41.679	159.877	7.36531	20.8263	102.922	129.903	106.168		CHGA	38.3508	50.3529	126.446	6.04815	64.1361	81.0577	59.4039	140.772		CDK5	19.6263	42.7274	42.3699	12.22	101.32	36.9818	30.7888	24.3379		GRIN1	78.0988	32.5885	81.4868	2.18633	14.7573	39.3301	101.951	77.4356
GRIN1	42.3406	38.8087	152.626	2.11415	24.5196	123.96	172.732	70.6643		STXBP1	65.4463	72.1409	137.25	3.64365	12.8106	78.6898	157.678	79.8211		AQP4	1.51788	4.30493	24.5913	19.8954	14.2407	24.109	61.8175	111.627		NPY	26.1565	32.0064	152.398	26.8028	240.248	16.8831	44.228	29.958		STXBP1	118.984	44.1656	109.354	1.85139	9.47631	41.4085	156.758	70.0906
STXBP1	57.4598	74.1245	101.727	1.36246	9.48437	99.7362	156.142	55.4941		NDUFV1	40.6541	83.9561	81.2555	37.0919	64.4367	103.695	79.1293	92.1042		CSTB	55.7634	54.7751	49.4876	71.6271	113.146	46.6795	66.4306	61.5531		GRIN1	29.1893	30.3604	105.502	1.12684	35.653	82.6068	143.28	87.8031		NDUFV1	115.746	91.1058	61.9597	18.8	58.2767	85.8189	67.1384	65.2917
NDUFV1	61.8945	81.4832	78.9005	22.049	78.5891	109.579	93.9114	73.4308		ATN1	52.1876	128.707	54.5572	14.8792	11.8731	52.9344	48.546	57.0856		IDS	35.9981	86.3796	125.56	16.281	74.5347	223.456	426.633	140.65		STXBP1	61.5105	50.8842	95.1714	0.937508	21.2721	70.1073	146.118	73.4489		ATN1	124.785	114.595	40.3436	4.28373	11.2552	29.4019	43.9462	56.7308
ATN1	85.4433	117.357	58.1993	6.04018	10.2198	56.5642	58.8027	59.9266		CHGA	34.1256	66.8077	185.334	18.0352	33.3307	108.221	94.1562	148.18												NDUFV1	51.0042	85.0356	79.9642	17.3349	112.7	81.6559	80.3873	75.1893		AQP4	2.1374	3.09837	30.6789	9.34617	11.2727	37.3841	28.0669	110.356
CHGA	62.6838	50.4912	196.91	4.7261	38.0303	108.693	141.366	90.6629		CACNG3	24.1934	37.0806	116.751	17.1967	31.6362	81.378	92.1635	53.033		ZEB2	72.5266	93.2899	14.2238	3.90986	5.31399	24.2538	35.2707	33.0227		CHGA	46.9856	51.7017	121.152	4.22551	61.3587	76.331	120.698	99.4892
CACNG3	17.7147	19.8209	103.123	3.6109	41.4268	88.5246	110.392	43.5504		APOE	8.93949	78.0153	224.481	1178.14	377.971	361.41	140.015	599.546		GABBR1	49.2472	64.9623	84.6953	27.7768	28.7484	94.3097	80.9271	71.4211		AQP4	1.62224	2.509	39.3043	9.71143	10.473	15.0537	29.0448	111.241		SYN2	11.8107	6.95984	41.701	0.771442	5.05851	42.8623	85.2332	33.3667
AQP4	1.0577	2.83537	42.9648	14.0693	8.01844	16.2349	21.3034	202.606		IDS	61.0279	61.9231	270.511	25.5311	33.727	224.514	404.279	108.744		NDUFV1	47.4124	74.8295	72.9543	25.2308	86.8354	77.7802	63.2006	80.7153		PRNP	76.3622	63.5576	154.317	7.86187	64.4277	179.857	365.826	207.371		CHGA	72.5773	62.5157	99.7674	3.91697	19.5578	46.386	64.0386	97.0953
SYN1	19.2544	43.4143	84.7263	1.4598	18.7621	132.666	117.988	71.2258		SYN1	18.2375	54.5211	91.8054	5.77404	9.9075	118.485	88.8752	94.6497		CACNG3	19.2125	25.0298	85.6211	2.96332	37.2621	77.3294	63.8347	50.7008		CSTB	53.2859	69.5804	84.1589	48.9163	136.266	43.8458	58.8505	67.2402		SEZ6	98.1288	52.4539	13.3287	0.197455	0.782481	4.99429	10.0167	6.03132
																				SYN1	24.5076	44.2878	88.2464	1.22896	33.8837	97.9225	72.1817	97.6007		SYN1	18.4647	39.3815	117.123	0.658179	47.3418	81.3438	104.167	76.3367		CSTB	82.0934	84.4118	45.073	49.2157	78.7702	43.1636	52.2778	72.2566
GABRD	1.11469	0.93824	41.8345	2.8233	34.2636	80.305	74.2177	32.6767		SEZ6	49.911	87.0361	33.2809	0.751001	1.01194	9.23514	9.76882	5.87709		ATXN10	71.4018	80.7042	60.5479	9.49664	27.7212	53.09	50.8098	29.5428												U2AF1	97.2743	65.2216	35.7618	11.3508	21.5077	17.3337	22.3644	25.505
GABRA1	2.29118	3.92587	42.3662	0.286782	2.58286	38.1357	92.1893	16.5864		AQP4	3.44715	2.80358	34.0284	19.2121	8.22304	18.4917	35.5367	91.5395		ATP6AP2	43.7641	58.973	79.4175	9.7064	20.7745	68.2975	90.6657	66.2194		GABRA1	3.0817	2.44531	32.566	0.431582	4.46819	28.8324	81.638	27.6712		SYN1	38.2523	38.038	63.5213	1.36378	10.9207	55.5073	95.9004	77.3165
GLUD1	10.8842	19.4626	22.2114	13.5476	7.17729	30.1738	22.9486	80.7983		DCX	85.1906	28.7262	6.91723	0.033624	0	0.593508	0.951395	0.475592												ATN1	65.7715	97.481	66.0176	5.77221	20.8662	39.1513	54.1195	56.9414		ATXN10	55.5002	83.4659	57.8214	8.49303	23.6353	48.1159	58.6088	26.6379
DCX	58.2969	83.6241	8.42245	0.13963	0.030831	0.537564	1.73285	0.669707		ATXN10	53.8808	89.9863	67.324	15.568	30.0439	55.8345	53.6427	30.4634		HAX1	23.4126	31.2827	30.8054	22.4084	74.2109	36.6481	30.1051	28.7345		CACNG3	18.2439	24.271	82.783	2.46887	64.8577	68.2108	87.0457	44.1709
ATXN10	45.2719	81.1892	63.7947	7.47258	22.4394	60.3011	50.1616	26.9273												KCNJ10	1.30727	3.17806	3.73591	3.39919	5.09726	15.5094	28.8639	62.6654		U2AF1	83.9009	54.4991	22.0347	11.892	27.9637	23.8244	31.5641	31.2999		HAX1	31.5259	44.8047	28.2549	21.8383	74.8361	49.7063	36.2357	23.7867
FKBP1A	26.6841	66.8259	41.3188	3.85337	27.7941	81.5351	54.0739	24.9169		GABRD	0.759964	0.8695	49.4388	9.8225	25.9993	69.2734	62.352	50.383		GABRA1	3.59446	3.71848	23.9897	0.377422	18.6509	23.1113	74.738	34.3788		DCX	81.2738	15.1611	3.72589	0.083624	0	0.350273	0.967518	0.624593		KCNJ10	0.587729	0.390944	4.25902	1.08143	1.73465	10.7533	18.1295	75.187
										SYN2	10.2281	13.9332	55.5514	0.905291	7.25066	63.8417	65.8467	32.2455		SYN2	10.0697	15.6694	42.532	0.618999	9.81048	58.2332	68.0625	40.5957		ATXN10	54.5544	80.0827	44.1457	6.06262	35.7666	53.7907	50.7617	29.0527		ZEB2	69.9436	33.8932	22.6642	1.67142	2.02095	12.3638	26.5923	40.9427
HAX1	20.4336	36.4391	28.0893	23.9004	66.193	44.6838	30.7463	23.6313		GABRB3	31.1077	21.3666	60.0161	1.25623	2.60667	19.1764	61.2757	16.568		CDK5	24.2893	36.0958	45.48	13.7049	61.3567	34.967	31.408	26.7714		MED31	7.91053	16.6459	10.4633	17.8332	84.1494	12.616	21.2807	9.85288		BRD2	70.245	50.4676	49.4469	4.48813	13.4869	18.7162	29.7838	26.7317
SYN2	8.87972	12.4396	51.0247	0.528677	4.96645	67.397	67.3254	29.9821		SCN1B	0.394153	0.329415	10.6845	3.41347	14.4159	20.2747	66.963	56.9902		SEZ6	29.662	70.6057	20.7338	0.311936	2.43806	7.88582	8.27958	7.47719												PAQR8	1.05056	2.62407	5.96233	2.44705	3.23256	18.2174	21.0418	74.3749
CDK5	16.4489	35.7215	33.9968	14.5662	72.9419	45.3245	32.8317	18.1285		ADNP	62.4351	40.7719	27.3064	1.71977	3.07212	12.7715	18.5497	13.3351		U2AF1	68.8541	48.4535	32.7688	15.1709	26.8915	21.9455	25.5922	31.4927		GABRD	0.694256	0.928169	57.7995	1.55945	60.6347	51.6272	63.832	41.3574		GABBR1	67.7908	50.3248	69.5687	9.38124	18.2729	66.8074	79.4656	71.5454
SLC25A22	14.3358	29.4455	62.8667	1.17978	15.4769	50.1319	60.0614	40.3029		CSTB	34.4189	73.6474	36.1066	74.4727	57.9888	39.4544	55.5501	76.738		DCX	32.1732	65.8475	2.01555	0.317683	0.136708	0.179448	0.976742	0.99534		KCNJ10	2.23611	1.21023	7.2644	1.10321	2.43649	25.1759	17.0359	72.0936		CCM2	18.9518	17.9051	19.683	4.80931	30.2942	69.2515	32.2484	39.1796
SEZ6	59.0784	77.7915	28.3855	0.286461	1.04503	11.5229	15.7587	7.0266		ARHGEF9	20.772	16.2777	54.5996	5.43735	8.05598	33.0112	60.1126	27.8826		SCN1B	0.676769	0.521047	7.54106	0.991217	40.609	16.3678	22.2597	61.9279		SYN2	9.95975	9.92447	54.162	0.423661	12.8632	48.0201	76.2094	33.7178		CACNG3	28.4407	26.6107	75.1155	3.10921	28.2692	48.6238	76.3347	43.998
CSTB	51.6149	62.4121	33.0409	58.7027	76.2152	41.1392	48.8274	73.4032		PAFAH1B1	69.2461	41.1286	69.0776	2.57242	8.79434	35.3387	62.7764	33.6766		MED31	9.86318	14.1214	20.9439	16.98	61.339	10.9608	23.2916	12.6294		BRD2	63.4463	48.8456	48.4852	5.4543	18.8733	26.2709	33.6902	28.8075		PAFAH1B1	42.2	14.4294	54.9786	1.89007	4.79573	25.079	74.1932	31.939
U2AF1	69.72	50.9752	27.9021	11.4362	20.283	20.6347	28.5999	29.832		FKBP1A	23.6128	69.8352	34.5046	14.0719	24.3224	76.1084	56.1604	34.7295												PAQR8	3.1813	4.67775	18.7278	1.83574	4.81206	33.2397	24.4144	66.6287		FKBP1A	41.4978	52.666	35.5553	6.35959	28.0051	64.3458	59.676	31.4359
PAFAH1B1	38.6555	57.8165	55.9747	2.54344	4.41644	42.503	64.1747	21.6112												GABRD	0.911085	1.11367	37.1105	2.14458	42.7225	55.7179	38.6142	47.4282		SURF1	8.06764	15.8551	20.9962	13.0882	61.4157	23.0802	17.6562	17.2531		MED31	4.9927	17.6062	16.3867	20.983	66.8472	17.6806	31.7733	13.3709
										KCNAB2	2.39782	3.44351	18.7756	2.15865	7.87095	29.1893	42.6224	44.5057		KCNAB2	2.1213	3.97996	12.7228	0.496713	16.0811	29.0534	35.6723	44.8585		SEZ6	59.89	67.3223	31.7862	0.184536	2.02142	8.38435	14.1697	6.57215
KCNAB2	2.95904	4.18358	17.7364	0.829431	8.96875	31.471	49.8915	36.1898		KCNJ10	1.11519	1.05955	6.16799	5.39251	2.21301	13.6902	22.0344	46.9039		BRD2	59.0788	57.0711	43.4565	7.65162	14.9258	29.6667	33.047	27.9423		ADNP	66.4949	34.4098	12.2448	0.64995	1.44648	14.5716	17.4119	14.3761		GABRD	2.70222	1.18741	24.6644	2.89141	20.4068	38.4903	50.9064	37.1578
KCNJ10	0.865613	1.90835	5.35472	1.63785	1.05175	9.96553	17.9152	58.8439		PPT1	11.1956	15.188	27.0223	9.30937	10.8053	20.2954	41.6905	25.3944		PAQR8	1.66284	9.71099	4.08431	4.03816	8.51717	17.9554	31.013	56.5291		FKBP1A	33.3843	65.1166	56.3014	5.01969	53.628	55.8163	51.3429	34.8452		NRXN1	40.3772	7.95426	21.8401	0.908417	0.472963	6.01105	22.0989	14.5647
PPT1	9.94814	14.3056	21.6661	5.34316	10.7565	23.9503	47.5444	27.1304		GAD1	11.427	8.71344	42.476	1.9773	5.81642	13.9521	27.6085	16.4019		CNR1	24.3321	46.2114	9.83085	0.71215	2.28787	7.57418	18.7918	9.64302												GABRG2	6.90101	6.03606	18.6482	0.84755	1.41266	12.2852	45.2422	15.0175
BRD2	56.2996	54.0044	56.7616	5.29598	9.67616	26.894	33.8469	28.5573		NRXN1	34.6126	20.7845	40.9958	1.07615	1.3832	9.61482	26.4381	13.1131		CCM2	12.7004	18.4196	25.6299	6.95776	29.5256	47.2364	33.957	37.4231		KCNAB2	2.89451	3.28945	15.2003	0.329287	16.1738	22.1512	41.4013	40.38		CDK5	24.2591	43.7693	41.9731	15.1639	58.876	38.7596	40.7829	23.1152
PAQR8	1.42522	9.3159	8.7124	2.21824	1.70838	15.4155	24.9256	58.0635		GABRG2	9.70173	11.3475	22.9501	0.848642	3.82386	16.8103	40.8126	17.9515		LGI3	1.59859	3.45026	4.88933	1.39687	19.6323	31.4405	33.1735	54.5878		CNR1	58.4491	20.2214	22.5488	0.238124	0.299174	9.45045	23.1369	10.9301		LGI3	0.282311	0.084324	5.00431	0.660099	7.44354	17.8637	36.0664	55.9152
CNR1	39.5454	43.0473	23.5457	0.311366	0.385653	10.6951	22.3633	9.20302		BRD2	50.0052	53.209	58.195	12.2775	16.6342	26.4011	35.9567	29.1271		SURF1	7.94717	15.555	19.3334	13.64	54.9992	21.1653	21.2575	15.6952		CCM2	11.8319	16.0958	24.1049	5.32261	30.3123	43.3504	38.2726	36.5638		SURF1	8.51729	22.6733	17.2997	11.4019	49.1108	35.45	18.4839	16.0506
CCM2	11.0668	16.5054	26.2348	6.86497	21.1655	57.6077	39.6658	39.5834		PAQR8	2.14246	8.24745	7.34425	8.6118	3.2359	19.9224	24.8506	42.7523		GLUD1	12.6055	21.5425	23.8874	25.0518	14.3275	30.3587	42.7063	55.1413		LGI3	0.783823	1.88495	11.4399	0.442083	16.4095	51.6448	45.8312	59.5833		GLUD1	14.1203	11.2808	30.0744	21.8883	20.7066	47.6693	33.117	57.8799
KCNV1	9.6852	18.2644	32.6843	0.780519	4.73569	35.4028	47.3965	6.52757		CNR1	42.5465	25.5675	30.0494	0.131208	0.920817	9.21342	24.0531	7.59655		SLC25A22	11.4652	34.6474	42.4249	2.07448	21.6971	41.0732	40.8842	37.1781		GLUD1	15.6173	14.196	22.651	17.8935	15.423	27.668	25.9994	59.2263		SLC25A22	29.0474	27.5847	32.5578	1.59603	13.9766	28.1112	42.0231	35.2564
LGI3	1.5954	2.10357	7.53461	0.327029	8.52841	42.9998	57.4318	29.6057		CCM2	9.5126	20.2879	24.177	11.9804	26.3345	54.4157	39.0699	39.7493		GABRB3	21.0505	31.7961	20.4026	0.665719	7.04729	18.4432	40.8212	22.3642		SLC25A22	11.4308	25.6675	57.9034	1.3039	29.3351	33.9764	52.412	34.0049		GABRB3	31.3604	7.16691	30.4393	0.80394	1.83561	16.3853	54.0591	12.4578
SURF1	7.34594	17.2163	15.4499	18.6622	40.0108	27.5119	17.7544	18.0845		CDK5	17.7462	40.3069	37.4735	25.4255	41.4531	44.3926	38.2506	29.0371		HCN2	4.55319	8.63189	27.8711	3.63192	33.5981	34.7362	34.8221	56.5983		GABRB3	24.9987	14.1504	28.3061	0.693985	2.20381	20.1736	59.5635	17.9161		HCN2	9.83605	9.41547	25.5448	2.46207	25.0698	24.967	40.1443	58.5411
GABRB3	22.7102	32.334	47.3157	0.947048	2.01059	25.1219	56.2261	13.4012		KCNV1	12.7609	16.4429	33.768	1.85634	5.86897	26.4247	42.9381	12.0917		PRKCG	2.48942	3.70816	30.8822	0.415139	9.55062	47.0173	30.3483	25.0122		HCN2	2.92646	9.28139	37.2162	2.41056	30.9375	30.3406	39.2326	47.6948		SCN1B	0.758684	0.523015	11.3453	0.885789	15.4891	16.4339	54.5584	49.8981
A2BP1	20.3642	21.9761	30.323	0.457105	1.55027	18.3012	48.7649	13.3014		LGI3	0.698549	3.2683	9.55622	2.47215	5.87504	36.0565	49.1444	53.4616		ADNP	57.1129	48.1818	17.4075	1.73544	3.11805	13.5276	18.1937	14.839		SCN1B	0.344381	0.490303	12.4037	1.0587	28.5535	18.8885	32.1978	41.6815		ADNP	48.3781	26.2888	21.2839	1.11697	1.45921	9.70303	19.5732	13.605
HCN2	4.46252	10.5819	28.5785	2.94242	21.8563	41.6004	46.4619	46.7564		GLUD1	12.9951	18.0719	22.1626	32.0831	15.3029	33.7134	30.9106	50.6507		SCARB2	30.8313	45.8157	14.3516	5.53264	10.4642	20.7062	42.5496	40.607		SCARB2	40.9513	29.5244	20.608	1.81633	6.21409	36.6207	38.9229	46.9187		SCARB2	20.8713	14.0991	21.6004	2.55232	5.62861	17.3547	38.855	43.4307
PRKCG	2.20649	2.60503	38.4948	0.621633	10.1888	58.5569	39.9932	20.9862		SLC25A22	10.1281	35.1821	49.8793	5.84698	13.3381	55.4726	44.2269	36.3957		ARHGEF9	18.1404	18.8293	29.7356	3.92215	11.569	33.6707	50.289	34.0544		ARHGEF9	21.7486	12.9764	26.2417	2.96155	6.40863	32.0311	58.1733	30.3926		ARHGEF9	17.2507	8.09922	37.9289	2.22248	8.42647	28.8967	55.5529	26.8512
SCN1B	0.526302	0.590815	9.62271	1.07087	16.7999	25.1618	49.2591	22.6758		A2BP1	19.0145	21.0829	33.3255	0.581997	1.87279	17.7556	43.6442	15.5795		SMS	45.67	35.7715	19.1082	2.2738	7.21236	17.6786	16.309	15.3201		SMS	42.5744	42.6667	9.63309	2.05025	5.5842	19.4907	14.0001	14.3728		DCX	52.6957	7.1763	4.75121	0.369807	0	0.4368	1.10201	0.335784
ADNP	51.2385	47.1754	22.3373	0.99049	1.00461	14.7171	19.7868	13.2612		HCN2	3.59347	12.0522	26.4684	9.62294	15.6274	34.257	45.9066	51.7533		PAFAH1B1	53.7704	57.5998	32.3943	3.33982	13.2396	33.8602	59.7981	41.2387		PAFAH1B1	56.2289	32.3194	31.6001	1.7667	5.24689	37.5343	59.175	37.2289
SCARB2	25.1813	46.9665	27.4992	1.07994	4.23135	16.7465	39.5903	29.5737		PRKCG	1.8991	4.19678	36.6237	1.57575	7.7733	46.9823	32.8888	26.0335		FKBP1A	30.2174	59.2582	37.9709	6.23824	32.0364	58.1399	49.1941	41.9631												KCNAB2	6.09494	3.4895	14.1567	0.424209	7.52112	19.7258	36.9731	34.9164
ARHGEF9	19.7374	18.9043	41.3782	2.92985	4.70255	36.6026	54.6952	24.1541		U2AF1	49.922	51.1457	27.3111	21.7488	25.2617	20.9488	28.8498	31.3829												PPT1	12.9168	15.0317	21.1816	3.81441	16.9439	22.7009	38.5013	27.5823		PPT1	9.97951	10.9697	22.3065	4.5817	16.148	20.8723	37.3537	23.7451
SMS	31.1985	41.458	14.172	1.9892	6.27461	18.7527	14.8956	9.68084		SCARB2	40.0143	32.2534	35.9338	3.72264	7.2939	17.7048	39.3766	36.4921		PPT1	11.179	14.814	20.2548	6.5969	15.8468	19.8473	33.4213	26.5277		SLC2A1	10.878	19.26	14.6887	5.48326	14.3646	21.0548	23.8523	34.087		SLC2A1	14.8011	20.7637	8.87203	7.80241	7.81822	21.5972	19.3386	34.4658
MED31	9.95387	15.9566	15.3335	23.1407	59.0678	14.8804	17.7247	8.304												SLC2A1	6.41786	21.2414	9.31517	15.7324	13.8728	14.9367	20.7285	34.3893		GAD1	15.6128	9.671	25.2561	0.399506	3.34276	14.7055	24.1332	18.7364		GAD1	12.1135	6.80474	30.7604	0.748086	3.13306	12.3782	26.7175	14.5678
										HAX1	16.2428	37.9592	27.3399	26.3182	39.758	39.9933	36.8821	31.4718		GAD1	11.3879	12.7465	30.6575	0.2367	8.05277	16.5584	25.4365	18.0023		NRXN1	35.0137	14.2572	16.7179	0.243588	0.400751	9.35592	29.727	16.9489		ALDH7A1	3.41475	3.40043	6.66608	2.59642	4.82506	6.28996	6.42735	20.2094
SLC2A1	8.99849	24.5814	13.6728	7.13254	5.24555	21.8288	23.5081	37.3028		SLC2A1	7.91109	26.0332	13.1864	17.0717	4.74858	23.0665	22.4185	34.8034		NRXN1	22.832	28.855	13.878	0.701991	3.54759	9.24767	20.9781	19.1911		SCN2A	15.9389	7.8535	14.1794	1.87202	0.84101	14.332	29.7083	11.716		SCN2A	11.1731	4.24341	20.9521	2.52733	1.03289	9.28535	30.7825	8.98479
GAD1	11.4209	10.7172	35.984	0.368841	1.3603	16.6128	26.0654	20.9993		SCN2A	25.3815	11.4209	33.186	2.31462	1.72659	14.4577	29.4586	10.8389		SCN2A	17.4004	15.9226	12.0028	3.00172	4.229	14.0256	24.1195	15.0489		SLC4A3	15.2776	19.8612	34.92	1.81808	15.1712	16.5387	20.6592	14.4472		SLC4A3	33.3032	25.0328	21.0405	1.41874	6.6506	16.5312	14.4646	12.1596
NRXN1	25.7467	27.8334	37.9919	0.77469	0.760014	12.592	28.0353	14.7036		SLC4A3	13.8571	25.6318	30.7629	4.40852	8.10293	24.1671	18.3194	14.6678		SLC4A3	14.4443	27.0486	25.3715	2.49703	9.60606	22.3037	16.0322	13.9925		GABRG2	9.86116	10.4186	17.884	0.362657	1.70778	17.1164	39.1015	16.8679		CNR1	32.1731	9.47575	19.9339	0.633541	0.502809	6.74015	19.3018	5.40078
SCN2A	14.3834	15.4775	23.9197	3.25542	0.830136	18.2035	32.4565	7.38863		HCN1	4.67288	4.25255	13.2087	0.207808	1.08806	9.43588	24.155	10.011		GABRG2	8.03157	11.4143	14.8377	0.714983	10.8626	18.0929	28.8681	21.2433		HCN1	3.69966	2.05864	7.53105	0.167713	1.36695	6.33927	20.5175	9.87102		KCNV1	14.0824	10.1656	17.4562	0.893246	4.14623	18.1851	34.641	10.4855
SLC4A3	21.4315	21.07	31.4218	1.47524	7.52416	26.4747	21.2484	16.745		KCNQ3	9.47931	3.95172	22.2855	0.646086	1.63726	9.39785	16.3906	5.25127		KCNV1	8.14671	17.2215	14.8882	0.763139	6.79949	18.691	24.176	16.5414		NEU1	6.25762	11.9419	10.5282	3.14736	22.8143	13.9148	14.6826	9.92468		DAPK1	21.1838	7.79111	4.89611	0.118394	0.30309	2.8522	6.02533	4.46638
GABRG2	7.40555	13.3944	20.6149	0.296256	1.01907	22.5571	38.6097	8.50529		MLLT3	29.3761	19.3337	5.63269	0.607238	0.818818	2.30032	4.89618	3.31903		MLLT3	21.2676	17.6592	3.01845	0.634348	0.699237	2.24045	5.65804	3.64234		KCNV1	11.4764	11.1028	20.2999	0.529393	8.45785	26.7047	39.655	14.722		LGI1	12.3721	12.8948	23.9113	7.00945	8.23719	12.2688	20.3029	11.7265
HCN1	2.97083	4.05871	10.6597	0.085498	0.609207	11.591	26.1818	6.99753		SLC1A1	18.0671	21.2782	18.1558	0.656628	2.11371	8.12327	11.0019	7.51921		SLC1A1	15.3655	21.4318	12.2347	0.730845	2.28864	7.03485	10.721	8.64528		MLLT3	39.4418	18.3452	2.59523	0.368237	0.369113	2.28637	5.3899	3.51951		TPP1	2.18199	2.16061	4.15702	0.719444	1.35991	4.61543	10.902	29.1729
KCNQ3	7.49854	6.39851	20.1116	0.262831	1.57205	10.3039	15.8986	5.26086		SURF1	6.27617	16.401	12.2337	18.6679	26.8106	26.0175	21.1801	17.6431		LGI1	10.6066	6.75149	20.0334	8.13546	8.1423	13.2161	20.0015	13.2643		TPP1	2.47689	2.38818	6.95379	0.610302	3.15507	12.0352	13.2732	26.7901		EIF2S1	15.6917	17.1357	28.8475	4.04382	16.3357	16.7063	27.2779	14.3655
MLLT3	25.605	24.3913	3.89161	0.092255	0.393168	2.10578	4.47075	2.93367		LGI1	8.80687	7.44815	20.5007	10.4568	8.87328	13.3049	18.1779	12.6943		TPP1	1.45206	3.65651	4.27792	2.0305	3.62183	8.02808	12.6287	25.4822		HSPB2	0.657703	3.77292	5.05343	3.46835	20.6832	6.51694	4.71249	6.27599		UBE3A	10.7883	9.37563	18.2668	2.56054	1.59368	10.2464	24.1131	9.04863
SLC1A1	10.9819	24.1269	15.0172	0.422554	1.02257	9.92453	11.1118	5.82524		TPP1	1.51857	4.54842	6.04737	1.83163	0.749392	6.95608	12.3851	24.4205		EIF2S1	20.9698	19.3676	18.2437	5.81884	14.3699	12.9969	29.1361	17.4036		EIF2S1	27.9006	20.2184	15.3995	4.13755	18.2722	14.305	32.5628	16.3201		A2BP1	31.944	12.7756	17.673	0.675949	1.5039	10.9174	32.3412	11.7133
TPP1	1.86714	4.15149	7.35661	0.618814	1.12427	7.75774	16.5411	28.5302		EIF2S1	24.841	21.215	29.5859	8.02883	14.1815	12.314	33.2114	16.3896		UBE3A	20.0818	20.5136	9.273	1.39582	3.58696	10.1078	19.6663	12.6644		UBE3A	24.8359	15.9448	9.11127	1.14286	0.871176	11.7857	16.8954	10.9701		ABAT	19.2758	5.97963	30.3766	1.39421	2.5909	17.5184	27.6181	23.7239
EIF2S1	20.1155	23.2889	22.5612	6.10129	11.0949	14.5965	30.0444	15.4892		UBE3A	26.2166	15.9674	18.5993	1.58122	4.21289	9.89523	20.8145	9.63556		A2BP1	10.7075	17.9444	11.4008	0.53065	8.443	13.9039	24.5023	17.773		A2BP1	16.1953	12.0323	21.7869	0.150653	2.58047	15.8383	38.9484	14.8166		GRIN2A	2.45188	0.473613	12.5218	0.81966	0.684226	4.62597	23.2125	6.32483
UBE3A	16.9092	23.3405	15.2312	1.99098	1.21708	11.4471	18.9536	9.08728		ABAT	15.4855	13.7069	33.4904	3.67415	2.91753	18.3101	34.3455	24.5992		ABAT	12.0157	20.2978	20.7459	3.08939	5.63428	20.624	30.1764	28.949		ABAT	16.0809	9.28975	28.564	1.65636	4.54898	14.4346	28.635	29.3024		TSC2	20.0019	15.1101	4.72052	0.941547	1.95286	5.30539	6.55256	8.79097
ABAT	13.3304	17.5208	34.3286	0.723393	1.80278	19.5988	33.3298	37.0193		GRIN2A	1.20387	0.352374	30.004	0.620412	1.93106	11.1553	28.9887	7.82522		TCF4	16.032	28.6917	4.2643	0.542801	2.2249	6.39542	13.3672	10.1534		GRIN2A	1.48352	0.332357	12.2862	0.378254	1.31707	9.74081	26.4489	8.71519		TCF4	32.4186	8.02954	12.548	0.686	0.559023	4.74895	12.3474	10.1362
GRIN2A	0.803211	0.834467	23.766	0.504712	0.938505	15.3272	30.1804	5.11421		TCF4	26.0403	15.6245	15.0229	0.695123	0.599445	6.41753	14.0605	8.6248		CSNK1G2	9.399	20.1502	18.398	2.911	12.8524	13.1635	18.9106	18.6713		TCF4	30.0474	11.6031	11.06	0.435028	0.456589	7.72073	13.7748	10.588		CSNK1G2	21.4181	18.295	15.9987	1.98606	11.6545	15.7094	17.922	18.3976
TCF4	23.9325	33.0697	16.429	0.454936	0.398512	7.26232	13.5645	12.1185		CSNK1G2	10.6781	18.86	21.3818	6.22446	9.47872	17.1625	23.0277	20.0734		KCNQ2	8.54143	19.6522	13.3169	4.99761	10.1054	13.748	21.022	16.2534		CSNK1G2	13.2328	14.5455	22.4332	2.02758	14.4569	12.4859	22.8983	20.9765		PRKCG	3.9045	4.44791	26.7843	0.410818	6.72446	26.3804	29.1305	21.1159
CSNK1G2	16.5421	17.1975	19.7681	2.6376	9.11835	14.9665	27.2173	24.2068		KCNQ2	10.7396	13.9938	26.3998	5.95182	3.8505	17.2641	27.8524	13.2634		SLC9A6	14.6551	21.438	13.1578	0.542007	3.0665	14.5381	18.8944	16.8067		PRKCG	1.63465	2.49653	34.6954	0.572089	18.9566	35.4159	36.574	22.9712		CHRNA4	24.7031	7.27806	8.89696	0.224431	2.6829	5.35145	8.39477	6.75209
CHRNA4	11.3622	14.0845	20.3688	0.286639	2.2185	11.3339	10.9902	8.67619		SLC9A6	18.179	19.3435	26.6399	0.630189	1.51045	16.5683	22.8577	12.9822												KCNQ2	10.8135	8.86048	25.6775	3.23707	10.3798	10.8916	30.8052	15.2238		PCDH19	21.8777	2.60292	7.34933	0.257476	0.141431	3.22938	6.52101	2.19533
KCNQ2	15.5843	15.148	26.3729	3.57836	6.18694	18.5381	34.8759	17.443		SMS	29.8921	34.3932	16.4705	2.19037	11.7802	19.0222	15.4352	15.0234		PCDH19	6.99114	15.6581	4.94011	0.547225	0.689348	3.49684	5.61752	3.65055		SLC9A6	15.3393	14.5543	16.9737	0.2428	1.23822	15.997	25.2708	13.9266		SLC9A6	18.1423	6.61668	17.4806	0.368314	0.485612	14.1129	25.2739	11.9347
PRODH	0.800984	1.28614	4.39115	6.01784	5.71202	3.96006	4.00282	26.8147		MED31	7.7837	14.6492	14.0266	27.232	34.8585	16.8915	24.0466	8.98745		AFF2	6.20258	8.32312	1.86801	0.140859	0.354416	1.28713	2.20708	1.39249												SMS	36.9628	27.3328	23.8092	1.82235	8.45653	20.807	20.3268	12.4131
SLC9A6	14.6104	23.2944	23.7742	0.307162	0.690568	21.3119	27.8595	13.4247												SLC5A11	0.056567	0.045275	0.119507	0.217623	4.63955	2.32172	4.51846	5.70752		PCDH19	13.6531	6.27866	8.17008	0.226005	0.122048	3.55857	10.1471	3.52606		PCDH19	21.8777	2.60292	7.34933	0.257476	0.141431	3.22938	6.52101	2.19533
										PCDH19	11.8303	8.87819	14.0465	0.45916	0.194868	5.00172	7.15893	2.66177		KISS1R	0.048122	0.116603	0.09848	0	0.378348	0.184262	0.153353	0.076794		AFF2	9.07533	2.80544	1.98901	0.125832	0	1.11163	2.35675	1.03693
PCDH19	12.8385	15.6803	16.6752	0.392233	0.121021	6.3048	8.84854	2.5415		AFF2	11.1265	4.87957	4.54055	0.209582	0.292639	1.35158	2.50964	0.977285		TRAPPC10	3.44596	5.2148	2.48273	0.117739	1.28398	4.46904	7.06575	7.0013		SLC5A11	0.084531	0	0.092841	0.019744	1.7748	5.36478	2.99499	7.53722		AFF2	6.88093	1.02512	2.79791	0.200498	0	0.860354	2.08712	0.96229
AFF2	8.15302	10.0097	3.6155	0.071749	0.158142	1.24691	2.99005	0.975116		SLC5A11	0.086734	0.023643	0.457905	0.413816	1.08497	1.64921	3.60937	5.9546		ALG6	2.21346	2.43013	0.958913	1.85549	1.27915	0.812753	1.45128	0.974315		KISS1R	0.047941	0.039178	0.125943	0.046903	0.203063	0.091423	0.259414	0.206163		SLC5A11	0.140891	0.032605	0.123312	0.048235	1.66085	1.30041	2.97318	8.38048
SLC5A11	0.076656	0.026274	0	0.04666	1.27228	1.59387	3.81904	3.08586		KISS1R	0	0	0	0	0.094028	0.037099	0.136397	0.249838		CABC1	4.63396	7.74794	3.63771	0.516947	2.48997	7.62736	4.63618	5.51103		TRAPPC10	3.99666	2.76254	4.03164	0.069619	0.314314	6.06082	8.35882	7.60399		KISS1R	0.167348	0.038728	0.137775	0	0.088158	0.061723	0.129252	0.106796
KISS1R	0	0.085199	0	0	0.045482	0.050767	0	0		TRAPPC10	4.84282	4.27532	6.00888	0.193362	0.571717	4.64186	8.50763	5.82375		CASQ2	0	0	0.580726	0.262148	0.191098	0.389364	0.831305	1.09719		ALG6	2.17797	3.52601	1.15629	1.99163	0.826871	1.30652	0.659454	1.32113		TRAPPC10	5.61506	2.18689	3.8186	0.067932	0.215748	2.73983	6.69202	6.89661
TRAPPC10	4.01065	5.2766	5.29854	0.122309	0.197297	4.53807	8.97546	5.36143		ALG6	2.49668	2.1772	0.973147	1.49202	0.971155	1.05592	1.14146	1.1907		CHRNB2	4.92524	10.3075	7.01094	0	2.28526	7.7272	10.7543	9.0115		CABC1	5.72346	7.3783	4.82949	0.143051	2.55817	7.22406	4.76521	6.2885		ALG6	0.7763	1.91701	0.551016	1.53901	1.64085	1.86664	1.24831	1.33652
ALG6	1.67264	2.30762	0.824631	0.860874	0.918082	0.982887	0.755116	1.26714		CABC1	3.48563	5.75855	4.56024	0.767231	1.99207	7.94259	5.43787	5.51108		PTGS2	0.220389	2.29365	0.741079	0	1.83493	0.563507	3.10879	1.10846		CASQ2	0	0	0.358063	0.091849	0	0.404478	1.12596	0.451801		CABC1	9.5672	7.24427	3.25366	0.417827	1.49575	6.07366	5.78747	5.78122
CABC1	5.13738	7.21726	4.9402	0.290161	1.73846	7.51605	4.9622	4.67386		CASQ2	0	0.039387	0.787113	0.377492	0.157834	0.507556	0.467103	0.586607		CACNB4	1.32661	1.24386	1.11016	0.261209	2.81704	5.13979	12.717	5.23582		CHRNB2	5.77851	4.56381	12.1132	0.037194	2.3832	6.14225	15.8721	8.36607		CASQ2	0.054619	0.229077	1.02306	0.246602	0.084663	1.25826	0.503153	0.675632
CASQ2	0	0.13833	0.508259	0.21829	0	0.585822	0.511164	0.34428		CHRNB2	5.44306	7.00865	12.5201	0.182784	1.12558	8.08154	14.3399	7.99796		KCNIP3	0.986584	0.676336	7.80754	1.10979	5.2735	7.34584	10.3253	9.38626		PTGS2	0.188437	1.61342	2.90638	0	0.463773	1.10213	4.21058	0.857336		CHRNB2	11.818	3.06526	6.76784	0.19702	0.742158	4.70897	11.1382	6.04337
CHRNB2	5.22785	9.55371	12.1668	0.062955	0.781829	10.2499	15.8664	5.68635		PTGS2	0.253091	1.04383	3.06699	0.051021	0.280721	1.0841	8.31551	0.971517		DGKD	9.97518	13.1134	5.03735	0.14415	0.475969	1.14723	2.09447	1.61477		CACNB4	2.59951	0.492847	3.31904	0.230509	0.748338	6.2241	13.6843	3.91834		PTGS2	0.03274	1.13755	1.74558	0.054746	0.292891	1.60504	3.86502	1.16024
PTGS2	0.147849	3.98384	1.59289	0.052243	0.114734	1.14953	3.46837	0.407528		CACNB4	3.21325	1.09657	8.23821	0.261962	0.501408	5.81805	17.3564	3.25645		SCN1A	1.0457	0.410644	0.925331	0.398668	3.47244	2.16862	4.5411	7.70892		KCNIP3	0.791491	0.337739	9.53572	0.483764	8.02475	7.86197	12.8523	10.5004		CACNB4	0.992715	0.086987	6.80976	0.348963	0.223059	5.26347	15.135	3.15358
CACNB4	1.98063	1.26563	8.57187	0.060201	0.199223	7.84636	12.8936	2.19939		KCNIP3	0.80909	0.716435	13.2742	1.14839	2.6283	7.59793	18.3609	9.96304		IL1B	0.07097	0.227211	0.14011	0.169597	0.679319	0.068763	0.743984	0.163921		DGKD	10.7495	5.57405	5.32218	0.044228	0.336449	0.780934	1.58075	2.19198		KCNIP3	1.48019	0.644983	10.0448	0.797945	4.5683	6.99889	13.6995	9.6171
KCNIP3	0.599355	0.32759	13.255	1.20171	4.13978	8.06577	16.6415	9.34754		DGKD	10.691	7.92252	7.7709	0.241698	0.292111	0.959246	1.66063	1.57517		KCNAB1	3.23466	3.59187	5.08575	0.628505	1.76592	4.69936	7.48705	5.24542		SCN1A	1.2077	0.218095	1.26999	0.129125	0.139864	2.27061	5.70615	4.44579		DGKD	13.502	3.56486	5.82945	0.147224	0.288183	0.895445	1.45427	1.97655
DGKD	9.41155	9.67463	7.99325	0.100841	0.227192	0.964357	1.32811	1.95379		SCN1A	1.21659	0.170629	2.49791	0.250126	0.377015	2.24378	9.02165	4.88228		CASR	0	0.014316	0.061173	0	0.015186	0.019398	0	0.013708		IL1B	0.069747	0	0.557215	0	0.362893	0.210133	1.81157	0.111383		SCN1A	0.791859	0.127114	2.0466	0.225027	0.112348	1.92993	8.17779	4.04422
SCN1A	0.826805	0.235191	1.56418	0.317441	0.082463	3.65646	8.12814	2.44907		IL1B	0.077039	0.234893	0.811654	0	0.224321	0.20998	1.04813	0.285786		CLCN2	1.03559	1.39463	0.476336	0.214066	0.515026	0.856748	0.882501	1.45935		KCNAB1	3.6605	2.4897	5.21694	0.613471	0.877008	4.99705	7.68125	4.97825		IL1B	0	0.167486	0.26895	0	0.151097	0.051816	0.51065	0.507976
IL1B	0.103895	0.156674	0.381466	0	0.088038	0.239584	1.08271	0.184657		KCNAB1	5.1831	4.01333	8.8421	0.48229	1.9581	5.6004	8.39754	4.59827		PLD1	0.144055	0.345043	0.139126	0.102091	0.604981	1.09394	2.50866	2.56784		CASR	0	0	0.115839	0	0	0.105558	0.417492	0		KCNAB1	2.15225	1.24196	9.22354	0.525395	1.20873	4.68488	9.69276	4.60729
KCNAB1	2.99219	4.28173	9.13511	0.405484	0.479732	6.696	8.27596	4.01533		CASR	0	0	0.128571	0	0.056279	0.190258	0.139508	0.013112		SCN5A	0.776674	1.49027	0.41834	0	0.065334	0.260456	0.109441	0.13022		CLCN2	1.36035	0.929261	0.580999	0.180064	0.380443	1.06853	0.897549	1.44567		CASR	0	0	0.336014	0	0.02586	0.115945	0.048262	0
CASR	0	0	0.047421	0	0.012855	0.131596	0.23785	0		CLCN2	1.27345	1.41192	0.83385	0.421053	0.310482	0.605529	0.607321	1.19783		HTT	3.45163	4.10074	4.14518	0.220742	1.68575	5.94668	7.33456	6.98498		PLD1	0.346705	0.109798	0.319146	0.026877	0.064623	2.84298	2.68441	3.29693		CLCN2	2.14086	1.05575	0.611804	0.218706	0.299762	0.345589	0.511327	1.49207
CLCN2	2.25265	0.919183	0.892778	0.242308	0.31705	0.633679	0.511406	1.29053		PLD1	0.074233	0.130552	0.162558	0.028342	0.160234	0.853644	2.03521	3.0329		LGI2	0.836653	1.18783	3.31686	0.272974	1.5827	1.79879	3.6789	2.60039		SCN5A	0.083679	0.065179	0.473074	0.00911	0.137349	0.186547	0.507135	0.201903		PLD1	0.2221	0.139082	0.206469	0.03	0.145104	0.486317	1.75446	3.67917
PLD1	0.153469	0.213204	0.186549	0	0.107896	0.5364	1.6078	1.66875		SCN5A	0.191636	0.054692	0.825407	0.015059	0.049687	0.174888	0.504447	0.184533		ALDH7A1	6.24151	6.7302	4.80577	4.82007	4.39	7.53273	8.25029	18.5308		HTT	4.94456	1.82206	4.83141	0.106873	0.951979	5.05167	10.1096	6.22174		SCN5A	0.218015	0.090267	0.425501	0	0.032858	0.075068	0.281338	0.116891
SCN5A	0.095598	0.090608	0.728141	0.003126	0.020337	0.305164	0.406931	0.256672		HTT	5.38195	2.56924	8.26559	0.485791	0.886428	6.48318	8.47175	5.20812		HCN1	2.13968	2.74045	5.19969	0.163514	4.69545	6.29397	13.9668	13.4385		LGI2	0.416515	1.12664	5.87745	0.046717	0.258021	1.88689	4.01338	2.72858		HTT	6.22018	1.50987	5.58145	0.258711	0.593926	5.0937	7.16804	5.43783
HTT	4.61148	4.07001	9.21236	0.204472	0.65973	7.03495	8.88978	5.18028		LGI2	1.73021	2.50551	7.53773	0.571152	0.75026	1.29221	4.29815	2.83111		KCNN2	4.98386	2.78566	3.59585	1.87033	1.7863	2.90613	3.69081	2.71742		ALDH7A1	8.58297	5.91718	4.12099	2.34683	2.33441	6.55725	5.32992	18.1976		LGI2	0.976446	1.45359	5.34086	0.361803	0.352968	1.38803	3.92178	2.17869
LGI2	0.840627	1.22738	5.90638	0.23174	0.433908	1.81147	4.91935	2.69551		ALDH7A1	5.5476	6.16307	4.32054	4.66243	4.57531	5.31827	6.59981	18.1041		GPR98	1.35366	0.849443	0.560012	0.290455	0.12836	0.655366	0.892665	3.05292		KCNN2	2.30093	2.65996	2.48901	1.30042	1.99768	3.01992	4.21525	2.97197		HCN1	7.68493	2.81248	7.69088	0.118788	0.642402	4.47069	19.3843	9.55157
ALDH7A1	4.82538	7.14224	4.4356	3.42616	2.68607	5.63022	4.46084	18.9713		KCNN2	3.33397	3.37387	4.41576	1.66873	2.45223	3.18121	4.19269	3.68466		ZNF354A	9.21973	5.1287	1.67476	0.92544	0.925619	2.23115	3.97747	2.2219		GPR98	2.7538	0.438708	0.520266	0.165501	0.1908	0.424153	0.591092	2.772		KCNN2	3.38587	3.02456	4.27763	1.33635	1.78676	2.16913	3.49822	2.5607
KCNN2	1.78968	1.33342	3.04776	0.847715	1.25493	3.02838	4.64987	2.57864		GPR98	1.47691	0.428267	0.997177	0.339826	0.192292	0.410907	0.459953	2.34246		ALDH5A1	4.19298	7.57642	6.8794	0.767208	2.16525	6.14587	11.2407	11.624		ZNF354A	7.21555	5.93923	1.06232	0.419043	0.998362	2.32169	2.33937	2.09491		GPR98	1.19387	0.612373	1.10534	0.166286	0.176673	0.545641	0.376896	2.81456
GPR98	0.971875	0.254815	0.731359	0.169755	0.145518	0.44672	0.466008	4.86838		ZNF354A	8.0675	5.49863	2.1988	0.52832	1.71308	1.65825	3.13305	2.14086		EFHC1	6.09713	4.2932	2.45855	1.02843	2.00465	2.26258	3.82057	2.27709		ALDH5A1	4.86807	3.29206	7.66276	0.300769	0.761528	5.96983	10.2238	11.4334		ZNF354A	4.13854	4.75399	3.5542	0.877384	1.04974	2.22078	4.37241	1.72563
ZNF354A	5.79571	5.6672	2.01254	0.348627	0.787284	1.44677	2.61893	2.04434		ALDH5A1	5.22158	4.09806	12.8582	1.22435	0.487865	6.95213	10.7374	10.2194		EPM2A	1.24636	2.00774	2.35969	0.699028	1.51227	2.76279	3.3342	2.66223		EFHC1	4.87821	3.06589	2.19593	0.929666	2.09569	1.79517	3.07192	2.42225		ALDH5A1	2.72132	1.57992	9.25161	0.825053	0.429812	7.30465	10.5813	10.192
ALDH5A1	3.86092	6.43034	8.98336	0.634997	0.32882	7.63471	9.23232	13.777		EFHC1	6.93113	3.00413	3.32696	1.00092	1.45293	1.9664	3.89387	2.12129		GRM1	3.06754	4.03543	2.15814	0.05398	0.647341	1.89371	2.88519	2.45741		EPM2A	2.41554	1.78205	2.47644	0.459892	0.78098	3.22165	2.46252	3.05165		EFHC1	3.71669	2.70296	3.74073	0.701695	1.99891	2.20268	3.85453	2.14165
EFHC1	5.16166	3.64758	2.51417	0.581425	1.59707	1.56094	2.36252	3.08184		EPM2A	2.35067	2.08804	3.56772	1.18313	0.975744	2.85563	3.96938	3.01747		NEU1	5.37131	13.0021	9.52801	5.76281	15.3562	13.1052	11.4138	11.9395		GRM1	2.97936	1.26867	3.28536	0.076433	0.232354	1.69056	5.38249	1.94657		EPM2A	1.66642	1.39582	2.3754	0.386566	1.08904	3.43271	2.90383	3.1822
EPM2A	2.60834	3.21525	2.78004	0.37317	0.753631	2.36623	2.79578	4.27332		GRM1	4.42989	2.43399	5.59794	0.050607	0.151073	1.89063	4.075	1.87987		NHLRC1	1.80069	1.6306	2.3086	0.09454	1.24537	2.00469	1.87584	2.19627		NHLRC1	1.37474	1.49647	3.45499	0.189669	1.42978	2.30965	1.83438	1.81596		GRM1	6.21189	1.39342	3.74185	0	0.069364	0.944013	4.60041	1.60551
GRM1	3.54884	3.65471	4.94038	0.103991	0.092004	2.02117	6.04514	2.1894		NEU1	4.89958	12.8994	10.8756	7.11762	9.5845	14.1382	17.9295	11.8615		OPRM1	0.038985	0.022948	0.144021	0.018568	0.05329	0.101712	0.822205	0.210532		OPRM1	0.016373	0	0.357564	0.023469	0	0.165202	0.660974	0.179957		NEU1	10.4876	13.0615	8.98691	5.55662	12.0113	12.4349	14.8803	9.23286
NEU1	6.87696	14.9912	13.5562	4.14788	11.3707	16.9719	17.9164	10.1193		NHLRC1	0.928133	2.57739	2.35936	0.548673	0.346685	2.2397	1.87646	1.70892		TBP	9.49581	9.84192	3.90289	0.707286	2.10363	3.1607	4.55321	4.60532		TBP	8.03168	9.80231	4.16904	0.592976	2.5399	3.79335	4.09484	3.28215		NHLRC1	2.58651	2.26977	2.42563	0.252313	1.01505	1.5816	1.75145	2.07471
NHLRC1	1.44269	2.09589	1.45942	0.160518	1.14138	2.15335	2.42156	2.84467		OPRM1	0.036459	0.041534	0.34667	0.053574	0.047544	0.230424	0.911367	0.236593		ABCB10	3.30683	3.47382	1.34485	0.205472	0.288073	1.47167	1.44469	1.57928		ABCB10	3.10708	2.17229	2.21578	0.032077	0.203221	1.36145	2.24146	1.60038		OPRM1	0.032786	0.025838	0.312145	0.050878	0.044812	0.162691	0.633178	0.248248
OPRM1	0.005595	0.053784	0.357465	0.049813	0.007797	0.1152	0.655612	0.382873		TBP	9.49656	10.5161	5.41222	1.26604	1.96314	3.10532	6.0838	3.0023		ADAM22	1.97774	2.17713	2.05732	0.428284	1.61848	2.2311	5.06434	4.69447		ADAM22	2.77036	0.618735	2.43706	0.260841	0.364001	1.89722	6.23292	3.64679		TBP	11.7763	9.76539	4.44534	0.571295	2.18722	2.64904	5.03661	2.98649
TBP	10.098	9.9291	4.02931	0.551457	1.62706	3.68597	4.18774	3.50471		ABCB10	3.83649	2.49351	1.67157	0.221123	0.393081	0.936613	2.0055	1.36072		KRIT1	4.82465	3.37904	2.56205	1.1626	1.46965	2.61262	5.11904	2.69137		KRIT1	4.3183	2.52314	1.8431	0.41173	0.813249	2.53658	5.04686	3.34651		ABCB10	2.38235	1.42658	1.55802	0.131949	0.24604	1.44352	1.8923	1.67107
ABCB10	3.86872	3.47595	1.37472	0.169237	0.13264	1.22164	1.30141	2.00504		ADAM22	3.5068	0.950751	6.84331	0.21708	0.38298	1.99821	6.93739	3.34934		CNTNAP2	2.04599	5.3475	4.43264	0.334128	2.06463	3.80642	10.355	7.88076		CNTNAP2	7.99047	2.9844	7.62269	0.115786	0.646513	4.27248	16.7747	7.32466		ADAM22	1.46524	0.305736	3.67937	0.190104	0.143348	1.61217	6.22703	2.73926
ADAM22	1.90772	1.92337	6.64794	0.146658	0.328892	2.5434	7.15959	2.39496		KRIT1	4.78396	3.49512	3.6342	0.791209	1.2874	2.00909	5.297	2.78487		EN2	0	0.046766	0	0	0	0	0	0.219672		EN2	0	0	0	0	0	0	0.12429	0.135696		KRIT1	1.38864	2.77947	3.33884	0.776307	1.15991	2.38197	5.97548	3.17937
KRIT1	4.01814	2.64156	1.64269	0.342093	0.494051	2.26676	4.83143	3.0194		CNTNAP2	5.14687	3.82237	12.4751	0.347833	0.52534	4.55423	14.9684	5.81448		IL6	0	0	0.046555	0	0.501303	0	0.06566	0		IL6	0	0.034591	0	0.060797	0	0	0.134502	0.048948		CNTNAP2	2.85645	0.486604	6.41535	0.349066	0.188386	1.56431	10.2323	3.9626
CNTNAP2	4.85572	7.28017	11.6097	0.299432	0.299971	5.38025	16.3519	5.01345		EN2	0	0	0	0	0	0	0.063058	0.09435		KCNH2	3.14141	8.77148	4.69388	0.203357	2.46144	4.54626	4.72818	5.71737		KCNH2	4.3097	6.14929	7.71992	0.124989	2.4681	4.14072	7.84641	5.26794		EN2	0	0	0	0	0	0	0.052553	0.103143
EN2	0	0	0	0	0	0	0	0		IL6	0	0.052141	0	0.09914	0	0.047439	0.073408	0.159103		RELN	1.58686	7.89325	5.29784	0.209776	0.343449	1.30262	1.4775	2.43917		RELN	2.4284	2.71256	4.07051	0.097254	0.143003	0.851213	1.73031	3.61004		IL6	0	0.0502	0	0.107835	0.225454	0	0.027667	0.129701
IL6	0	0	0	0	0	0	0.210208	0		KCNH2	3.26423	8.70522	6.24033	0.813121	1.49759	5.88157	6.80343	5.15657		SGCE	6.50241	8.27991	8.85027	9.34603	5.83303	10.3178	13.9469	12.7727		SGCE	9.04635	9.61844	8.58877	6.44142	4.03156	12.6927	12.3912	13.1951		KCNH2	8.12233	6.82212	3.34408	0.218905	1.41916	3.07413	5.711	5.65637
KCNH2	4.99231	8.07061	6.60183	0.112432	1.65819	5.56688	8.1743	5.63396		RELN	3.69028	7.70864	8.92515	0.265093	0.457122	0.79132	1.80624	3.2806		CHRNA2	0.217319	0.176321	3.68912	0.176915	1.50516	2.42216	1.83529	1.49292		CHRNA2	0.707041	0.346592	7.8164	0.105908	1.37016	2.78686	4.0813	3.0347		RELN	2.84362	2.27636	5.60832	0.380237	0.207599	0.932895	1.24137	1.19153
RELN	4.01197	10.0656	7.41706	0.17044	0.101002	0.87817	1.32868	2.93358		SGCE	6.44812	9.84391	9.66172	9.77431	5.98872	9.73604	13.7855	13.4972		CHRNA6	0	0.006153	0.301051	0	0.079957	0.180053	0.170951	0.152821		CHRNA6	0	0	0	0.027257	0	0.12193	0.225874	0.174072		SGCE	5.87124	8.04053	9.15119	4.8887	6.39349	10.2864	12.4022	12.9285
SGCE	6.60332	8.11851	8.8402	4.81186	2.7702	7.61828	10.5284	13.6348		CHRNA2	0.818783	0.455787	5.17618	1.04015	2.35161	3.29986	3.20652	2.08559		CLN8	1.49685	3.23441	2.38012	0.644836	2.21139	4.21597	7.08162	8.47643		CLN8	2.2716	1.79697	2.1874	0.522251	1.23235	6.56967	6.78377	9.9832		CHRNA2	1.4888	0.318277	4.13202	0.368928	0.915676	2.58909	3.8878	1.94365
CHRNA2	1.26254	0.805933	5.90366	0.226094	0.774525	3.77986	4.38593	1.66068		CHRNA6	0.035219	0	0.762504	0	0.136566	0.027041	0.185461	0.345534		CSMD3	1.84278	1.46938	0.486527	0.138712	0.175594	0.372043	0.755235	0.682		CSMD3	3.03914	1.04481	0.704059	0.097469	0.083251	0.412671	0.982677	0.578954		CHRNA6	0	0.004959	0.458767	0	0.032996	0.123199	0.127917	0.103087
CHRNA6	0	0	0	0	0.025554	0.119052	0.118202	0.229388		CLN8	2.41791	2.10384	5.2351	0.853066	1.22225	3.65416	5.5503	7.24804		JRK	2.00012	3.74736	1.29196	0.319254	0.705104	1.38221	2.05958	1.94695		JRK	2.4693	1.524	1.59642	0.083451	0.352859	1.08813	2.19954	1.89013		CLN8	2.16499	0.914245	2.59591	0.811899	1.25167	2.05205	3.63958	12.6982
CLN8	3.17481	3.32738	4.83667	0.566876	1.32767	3.93651	6.27874	5.81491		CSMD3	3.19307	1.0816	1.2934	0.104955	0.159074	0.377408	0.903501	0.382841		KCNQ3	4.5069	6.64079	7.70041	0.510251	3.17759	8.32405	13.3064	6.39427		KCNQ3	9.59821	2.59654	10.5005	0.416221	1.96493	8.2733	14.125	5.41939		CSMD3	1.43106	0.411098	0.974887	0.094647	0.07069	0.250258	0.867838	0.5021
CSMD3	2.00867	1.8521	0.928636	0.085175	0.065788	0.387554	1.06076	0.613434		JRK	2.65813	1.88337	2.24807	0.123242	0.248598	1.38382	2.59724	1.434		PLAT	1.76132	4.16602	2.23176	1.6958	2.25356	2.48571	4.24937	5.04813		PLAT	2.1547	3.30121	4.0157	0.786288	1.47677	2.65239	4.67659	4.59772		JRK	3.09288	1.0049	0.828721	0.100682	0.278034	0.978309	1.59653	1.77764
JRK	3.36517	2.41193	2.08731	0.159176	0.251414	1.59144	3.2823	1.94279		PLAT	1.46467	4.22672	3.75952	2.90489	1.2583	2.95753	4.44211	4.79554		DAPK1	10.7041	16.0161	5.23512	0.382748	1.15317	4.89931	5.22257	6.31929		DAPK1	14.5053	9.48878	5.57791	0.062875	0.889519	3.61623	6.56148	6.00327		KCNQ3	8.25418	2.91166	12.4612	0.364923	1.57008	8.69998	11.5367	4.22714
PLAT	1.54293	4.49771	5.21595	1.29387	1.03905	2.73414	5.19811	4.83178		DAPK1	15.1735	13.0808	8.31187	0.649221	0.907351	4.44317	6.81407	5.74242		IFNA1	0	0	0	0	0	0	0	0		IFNA1	0	0	0	0	0	0	0	0		PLAT	2.92856	4.31988	2.86735	0.945062	1.24437	3.26591	3.41752	4.50191
DAPK1	16.1538	14.5062	8.10464	0.227453	0.387042	5.16567	7.51439	6.30576		IFNA1	0	0	0	0	0	0	0	0		TSC1	6.16886	4.07683	1.81671	0.347707	1.05025	2.21411	4.92437	4.11891		SLC1A1	13.7718	15.1954	9.75028	0.303792	1.62002	7.65376	11.2241	7.00007		IFNA1	0	0	0	0	0	0	0	0
IFNA1	0	0	0	0	0	0	0	0		TSC1	9.2233	2.24334	5.51221	0.348251	0.663962	1.74072	6.04848	3.38346		EMX2	2.43465	4.68249	2.57147	9.72197	6.03604	2.52908	3.10107	6.4415		TSC1	7.86789	1.23443	2.27717	0.170789	0.294275	2.10275	5.88214	4.13284		MLLT3	18.376	13.1134	6.56786	0.631921	0.464081	1.24644	4.77849	3.20449
TSC1	8.49361	4.39924	4.80113	0.159084	0.184594	2.16788	5.50681	3.68253		EMX2	2.8624	3.63839	2.42662	12.9496	4.22785	1.51425	2.01607	7.93619		WNT8B	0.013989	0	0.054438	0	0	0.037562	0	0.016016		EMX2	5.38213	4.36908	9.0945	8.90524	5.91747	1.69312	2.1531	7.82272		SLC1A1	10.2755	8.65911	13.9794	0.623826	1.02995	5.77929	12.978	5.97015
EMX2	5.82002	4.20383	3.98667	8.3924	4.55568	2.46518	2.00445	12.87		WNT8B	0	0.045544	0	0	0	0	0	0		FDXACB1	4.38049	4.53003	1.93935	0.914278	1.47052	1.71492	2.10114	1.67714		LGI1	6.93356	6.33877	14.3138	5.83752	12.0342	12.5632	18.5061	11.8111		TSC1	5.92814	1.20734	3.19337	0.179876	0.176415	0.856143	4.86885	3.38219
LGI1	5.98596	5.65677	15.1152	6.03702	5.81759	13.2936	16.8501	13.893		FDXACB1	4.87249	4.58105	2.16747	1.34543	1.34373	1.71439	2.20857	1.72747		BDNF	4.09997	3.61172	5.63299	1.06421	5.29996	6.84023	10.9328	7.30603		WNT8B	0.053545	0	0	0	0	0.040743	0	0.042755		EMX2	2.09822	1.50053	3.76316	5.91211	5.33341	2.58463	1.58943	9.96357
WNT8B	0	0	0.146427	0	0	0.017993	0	0		BDNF	4.66052	5.10593	11.9248	2.6519	3.47141	6.28386	10.6206	5.67687		DPAGT1	3.68485	6.6004	4.53486	1.24107	3.12788	4.93597	4.82683	5.124		FDXACB1	4.34915	4.61049	1.7935	0.773891	1.39706	2.07242	1.36308	1.67664		WNT8B	0	0	0	0	0.039925	0	0.027523	0
FDXACB1	4.16674	4.95326	1.96239	0.875146	0.972574	1.94145	1.98512	1.43577		ELP4	2.38076	2.53852	3.18475	2.86668	3.33661	2.62108	3.35791	3.99198		ELP4	2.17378	2.45492	2.53939	2.61002	1.72745	2.57587	3.83502	3.76199		BDNF	2.02891	1.26795	6.92901	0.643502	5.41363	7.65833	7.87625	7.03453		FDXACB1	3.95791	4.65542	1.56202	0.854774	1.49544	1.60083	1.92489	1.87469
BDNF	1.11566	1.21222	9.85578	0.681065	4.44289	8.51143	11.6693	5.69758		GAL	0.305626	0	1.45542	0.45681	1.0218	1.27293	0.406586	1.07826		GAL	0.143849	0.49391	1.51914	0.648209	2.34693	2.55837	0.551696	0.71266		DPAGT1	3.82752	6.41606	4.78668	0.520949	3.36948	4.48116	8.46544	4.07795		BDNF	0.394205	0.105404	8.26302	0.981163	3.78509	6.24585	12.3309	6.27618
DPAGT1	4.21551	6.84102	4.62446	0.541038	1.25449	5.69623	5.91712	3.69663		HSPB2	1.20865	6.58308	4.44316	3.99104	6.13104	7.54125	5.34731	6.77849		HSPB2	0.916297	3.90764	3.92407	3.41747	19.0825	5.65108	5.61292	7.37083		ELP4	2.52859	2.50139	2.00504	2.00683	2.6071	3.27697	2.99171	4.31499		DPAGT1	5.25947	4.50216	3.89028	0.255183	1.19025	2.91897	6.82995	5.30122
ELP4	1.58725	1.98135	2.81741	2.43076	1.44872	2.35341	3.25649	4.10013		KCNA4	1.32015	0.959693	4.73541	0.379432	0.796402	4.74935	5.47475	2.43885		KCNA4	1.71774	1.45242	3.38816	0.263612	0.810755	4.24249	3.72062	3.33292		GAL	0	0.138342	0.499564	0.148334	4.64122	1.31736	2.26119	0.914511		ELP4	1.62834	2.03053	3.05117	1.90198	3.14262	4.73805	3.74479	3.58996
GAL	0	0.12308	1.933	0	2.28286	1.58224	1.17329	0.791964		KCNJ11	2.64757	6.07518	6.99637	0.421603	2.52655	9.22859	9.56209	7.76194		KCNJ11	3.10018	7.10836	5.74578	0.287252	4.21034	6.89764	5.59588	7.45226		KCNA4	1.29633	1.10142	3.06215	0.286923	0.21629	3.97526	6.45063	2.8854		GAL	0.045917	0.177846	0.668948	0.720824	1.15341	0.33487	0.834438	0.564456
HSPB2	0.866499	4.96981	4.26362	3.79557	11.1973	7.76757	6.33885	9.31809		KCNQ1	0.265961	0.36679	0.359241	0.216308	0.090517	0.143054	0.288295	0.224951		KCNQ1	0.243408	0.18568	0.213914	0.103935	0.18037	0.119649	0.265943	0.264014		KCNJ11	2.94854	4.86204	7.1952	0.144074	2.57574	5.65838	7.13719	7.71899		HSPB2	1.20071	3.83825	4.50166	2.88774	11.9516	8.12468	5.547	6.81943
KCNA4	0.682538	0.964844	5.1767	0	0.476182	4.41938	5.77	2.38479		PHOX2A	0	0	0	0	0	0	0	0		PHOX2A	0	0	0	0	0	0	0	0		KCNQ1	0.228355	0.18902	0.274692	0.025888	0.195147	0.154541	0.189075	0.244971		KCNA4	2.04838	1.24571	3.80071	0.101783	0.591179	3.16995	4.91601	2.6044
KCNJ11	5.05024	4.57234	7.84867	0.081287	2.63169	9.0573	9.59489	5.03977		UCP2	1.0959	7.45165	0.832599	3.63269	1.90761	2.79743	2.4468	2.30647		UCP2	2.36419	6.91532	2.26759	3.12132	3.44882	2.85653	2.33368	1.94454		PHOX2A	0	0	0	0.071996	0	0	0	0		KCNJ11	10.3759	6.7106	5.04687	0.170363	1.73651	5.36755	6.78531	7.39144
KCNQ1	0.690833	0.252171	0.399931	0.088235	0.056461	0.17808	0.594674	0.343644		KCNA10	0	0	0	0	0	0	0	0.027951		KCNA10	0	0	0	0	0	0	0	0		UCP2	2.80986	5.07929	3.84049	2.26847	2.06616	2.78597	3.00576	2.9314		KCNQ1	0.539853	0.203504	0.179757	0.182409	0.139973	0.160716	0.107147	0.229049
PHOX2A	0	0	0	0	0	0	0	0		PRICKLE1	6.17744	6.43268	12.3878	1.06679	1.97063	11.6201	18.6692	8.61632		PRICKLE1	5.19191	3.98368	5.75299	1.13639	3.16662	10.7004	13.3691	10.7569		KCNA10	0	0	0	0	0	0	0.072337	0		PHOX2A	0	0	0	0	0	0	0	0
UCP2	1.79964	5.23857	1.5587	2.36996	2.31545	2.55743	3.60767	1.5047		ATXN2	8.98581	9.80313	9.66488	1.22859	1.06267	4.66773	7.96615	8.17957		ATXN2	8.44951	9.0456	6.79474	1.28256	2.38264	5.37739	6.83518	8.52489		PRICKLE1	4.99401	4.22308	8.84122	0.282401	1.94778	11.6042	16.2842	7.44971		UCP2	2.70181	7.02081	2.15036	1.38117	2.84453	3.52245	2.21952	3.02431
KCNA10	0	0	0	0	0	0	0	0.097866		SLC6A12	0.606583	1.66629	2.55701	2.24307	1.00629	3.68372	3.09224	5.54406		SLC6A12	0.803651	2.80005	2.6256	1.4907	2.56133	2.5933	3.74173	5.21718		ATXN2	8.74768	8.73949	7.24382	0.551962	1.99316	4.63253	7.83324	8.42233		KCNA10	0	0	0	0	0	0	0	0.027824
PRICKLE1	4.61007	5.81844	9.56547	0.25469	1.07135	13.455	18.06	6.4043		SYT10	0.140088	0.080644	0.61392	0.040652	0	0.270421	1.13782	0.420221		SYT10	0.036611	0.032514	0.200967	0.030765	0.21503	0.690008	1.97915	0.299806		SLC6A12	0.781374	1.44631	4.59894	0.760778	1.4646	3.93821	4.49217	5.42329		PRICKLE1	4.19414	2.62594	7.62294	0.238316	1.11803	6.51847	17.8385	7.70712
ATXN2	9.77432	9.4969	7.03224	0.606148	0.910868	5.54856	8.41328	6.89749		CLN5	4.52615	3.52646	3.53092	4.61984	2.55728	2.82201	4.6507	4.33873		CLN5	4.47265	5.3444	3.40368	3.50287	3.6243	2.50781	4.75629	4.76302		SYT10	0.312482	0	0.357278	0	0	0.202001	0.825705	0.365716		ATXN2	13.0527	8.26333	6.9827	0.56414	1.27574	2.90874	6.89609	9.32451
SLC6A12	0.765679	1.4334	2.18581	1.12483	1.00206	3.1912	3.6087	7.19456		L2HGDH	2.05647	1.24634	2.93744	0.495251	0.435928	1.03688	2.30419	1.3364		L2HGDH	1.26734	2.04366	1.58018	0.487202	0.836743	1.54786	1.78494	1.6947		CLN5	5.43041	5.26515	4.19952	3.06403	5.56743	4.08623	4.33702	4.63262		SLC6A12	1.27004	1.12685	2.75248	1.10101	0.995255	3.93189	3.8735	5.34156
SYT10	0.183964	0.206857	0.401546	0.060398	0.026673	0.364061	1.05537	0.095258		L2HGDH	2.05647	1.24634	2.93744	0.495251	0.435928	1.03688	2.30419	1.3364		L2HGDH	1.26734	2.04366	1.58018	0.487202	0.836743	1.54786	1.78494	1.6947		L2HGDH	2.17313	1.1886	1.44648	0.197579	0.57963	1.34292	2.78892	2.48308		SYT10	0	0	0.338372	0.036778	0.073957	0.319316	0.972058	0.400023
CLN5	4.3347	4.50617	3.51699	3.40952	1.91331	2.12584	4.29425	5.3575		PSEN1	9.56228	9.7033	12.1909	2.6097	2.9724	9.05854	12.8716	16.0202		PSEN1	9.09772	13.1885	6.65264	1.92379	4.41514	10.1803	15.9314	15.4388		L2HGDH	2.17313	1.1886	1.44648	0.197579	0.57963	1.34292	2.78892	2.48308		CLN5	3.02507	2.78659	4.08412	3.25816	3.56899	3.42357	4.69186	4.55314
L2HGDH	1.01362	1.30368	1.7332	0.309154	0.305791	1.51823	2.44864	1.84672		ATP10A	0.365299	0.561223	1.78876	1.52437	0.639412	1.21016	1.97559	2.62249		ATP10A	0.350223	0.670693	1.32007	1.26995	1.12328	0.89812	1.61574	2.27318		PSEN1	11.7353	11.2106	7.69447	1.17851	4.10574	19.0137	14.0295	19.3957		L2HGDH	1.09738	0.855152	2.08191	0.378694	0.526456	1.17919	2.38778	2.1168
L2HGDH	1.01362	1.30368	1.7332	0.309154	0.305791	1.51823	2.44864	1.84672		CHRNA7	0.263482	0.204701	0.599611	0.045705	0.065643	0.402989	0.770625	0.662185		CHRNA7	0.030454	0.373338	0.613928	0	0.207172	0.652589	0.556888	0.71369		ATP10A	0.290839	0.488337	1.9324	0.872068	1.55757	1.38136	2.3753	2.08058		L2HGDH	1.09738	0.855152	2.08191	0.378694	0.526456	1.17919	2.38778	2.1168
PSEN1	9.3206	13.5946	7.38073	1.31488	1.73084	8.92017	14.3318	11.1748		CLN6	1.56415	2.58349	3.31596	0.892723	1.57769	4.30494	5.25903	4.54284		CLN6	0.943942	1.86082	2.85587	0.83013	2.49151	4.401	3.81212	4.38146		CHRNA7	0.213622	0.214181	0.549129	0	0.433719	0.501643	0.908557	0.755244		PSEN1	8.76648	6.0902	8.66415	1.12214	3.2795	6.62256	13.4374	17.7818
ATP10A	0.315376	0.511969	1.72629	0.921836	0.621167	1.0677	1.96128	3.91297		NEDD4	0.200429	0.114323	0.086059	0.019208	0.013219	0.106224	0.199923	0.12011		NEDD4	0.098783	0.135836	0.043847	0.024161	0.021255	0.060236	0.145935	0.248497		CLN6	1.10896	2.85425	7.89333	0.658092	3.12035	5.19426	5.52855	5.01006		ATP10A	0.722866	0.550148	1.50843	0.585247	0.666099	0.915616	1.63089	2.13051
CHRNA7	0.416515	0.464244	1.42614	0	0.088749	0.644845	0.826661	0.080324		POLG	4.9933	4.75952	5.86159	1.30495	1.33646	5.52458	6.60099	5.17767		POLG	4.43988	5.53649	4.06284	1.09941	2.34469	5.18754	5.16285	5.80277		NEDD4	0.192581	0.074503	0.163807	0	0	0.046615	0.184361	0.141938		CHRNA7	0.391225	0.099043	0.485201	0	0.27024	0.5641	0.390627	0.341633
CLN6	1.89553	2.46662	3.54672	0.874421	1.61775	5.28061	5.82824	2.72799		SLC12A6	5.54591	2.26486	4.24111	0.0748	0.237112	1.78893	4.52188	2.98202		SLC12A6	2.93203	3.72209	2.15947	0.12479	1.01201	1.85149	4.5667	3.58738		POLG	6.01701	4.10513	5.26804	0.521544	2.39478	4.48785	6.85013	5.5373		CLN6	3.00187	1.60812	2.67468	0.10468	1.37186	3.22793	5.04277	4.66897
NEDD4	0.073304	0.196555	0.067286	0	0	0.1066	0.123976	0.195871		ABCC1	2.02143	1.10233	1.78451	0.03994	0.079068	0.712417	1.37488	0.85636		ABCC1	1.3425	1.66857	0.61549	0.048174	0.326955	0.549438	0.814299	1.1203		SLC12A6	4.91263	1.29585	2.05878	0.077814	0	2.42944	4.50634	3.63402		NEDD4	0.083118	0.050304	0.187456	0	0.009236	0.100724	0.222521	0.231322
POLG	7.45252	5.2377	6.72079	0.245979	1.04252	5.87028	8.62491	5.75955		CACNA1H	5.45099	8.17768	2.38827	0.268104	0.289683	1.94804	2.85712	2.04575		CACNA1H	4.49292	9.87948	1.94429	0.079027	0.55509	2.02553	2.25919	2.29761		ABCC1	2.58478	0.765761	0.437106	0.012081	0	0.62891	1.72101	0.8541		POLG	7.35949	3.95058	4.07782	0.375289	1.31798	2.82203	5.04447	4.82199
SLC12A6	4.59469	3.3285	3.5193	0.037938	0.081873	1.6066	4.47365	2.55031		CLN3	5.37376	10.8002	2.45868	2.6962	1.48326	2.03009	2.46607	3.09216		CLN3	5.4698	10.059	2.73352	2.46424	4.66392	2.44289	2.41465	2.69456		CACNA1H	4.93108	5.04288	2.92236	0.055492	0.915763	1.51693	3.8823	2.35289		SLC12A6	3.76873	0.625923	3.04826	0.193152	0.070108	0.600008	4.6269	3.67405
ABCC1	2.72623	1.75166	1.4306	0.020448	0.062846	0.817202	1.26836	0.591404		QPRT	0.337215	1.24856	1.44945	2.95768	2.00667	3.38816	3.13798	5.13734		GRIN2A	0.755097	1.29381	9.29375	0.492333	4.44755	10.0682	19.7895	10.7849		CLN3	6.82725	10.1359	3.52683	1.27779	4.79126	2.92884	2.64549	2.87984		ABCC1	3.1969	0.678719	0.792787	0.064284	0.05376	0.297419	0.917664	0.809247
CACNA1H	7.96534	7.28406	2.99081	0.063282	0.406544	2.09161	3.52878	2.44254		TSC2	10.1031	14.8613	7.29101	2.0848	2.17529	7.426	8.13665	8.54285		QPRT	0.07437	1.15026	1.39402	1.49541	4.96965	2.30561	2.80255	3.89548		QPRT	0.559181	1.03212	2.28959	1.33527	4.06651	2.61502	3.75925	4.93109		CACNA1H	13.0417	6.89121	1.24083	0.052443	0.510709	1.01177	1.9575	2.04439
CLN3	7.06358	9.5431	2.38378	2.23266	2.39398	2.085	2.5534	2.9645		CACNA1G	3.27013	2.50947	10.2771	0.526456	1.00395	4.50995	6.03597	3.62396		TSC2	8.60159	15.1562	5.92117	1.3189	4.15716	5.75503	6.76963	8.50436		TSC2	12.1211	12.9081	7.49661	0.899202	3.17344	5.70039	9.48749	7.99208		CLN3	6.24697	10.5847	2.37597	1.22886	2.10463	1.92673	2.37821	3.00509
QPRT	0.168466	1.9506	3.24842	1.36251	2.7496	2.20701	3.5958	6.683		NF1	6.29537	2.5752	5.90446	0.291793	0.378299	3.407	7.20125	3.88531		CACNA1G	1.60148	1.72855	4.78827	0.283346	1.48297	3.42074	3.32238	3.81378		CACNA1G	1.99601	1.4343	6.89315	0.198859	1.51177	3.55943	6.31459	3.94409		QPRT	1.06445	1.66513	1.28486	1.02584	3.32144	2.91955	2.52522	5.37762
TSC2	14.2473	14.5617	7.74559	1.36987	2.26437	7.67947	9.49111	8.81959		TRPV1	3.21274	1.5677	1.19138	0.100117	0.256398	0.404007	1.02062	1.14035		NF1	3.73031	4.62561	1.98009	0.267498	1.15681	3.55726	6.88741	5.66622		NF1	5.19296	1.81115	3.52174	0.137371	0.220362	3.8429	6.21177	4.95363		CACNA1G	10.6343	4.73521	5.18845	0.179713	0.695266	2.16997	4.73367	3.1589
CACNA1G	4.48148	2.38326	8.88262	0.181188	0.888347	5.18874	7.80715	2.7561		ME2	13.495	12.1991	11.4625	2.96532	4.15282	6.84859	8.0147	6.55585		TRPV1	2.12045	1.99987	0.815034	0.267961	0.248816	0.72645	1.08017	0.791053		TRPV1	3.40541	1.29596	0.815903	0.09604	0.156536	0.487475	0.791191	1.01984		NF1	3.06802	0.946964	3.91079	0.34121	0.16117	2.10647	6.77523	4.81755
NF1	3.6373	4.48331	4.74887	0.153056	0.22168	3.71583	6.76186	3.9985		CACNA1A	7.77107	7.9791	11.0187	0.948187	1.25076	4.61278	6.71256	5.94552		ME2	14.6732	11.1643	9.1674	1.46117	2.16548	5.43385	8.63399	7.76588		ME2	13.5985	12.4611	5.90967	0.913069	1.88528	7.49968	7.1552	7.9465		TRPV1	4.11269	1.38144	0.846723	0.174951	0.302699	0.063517	0.554682	0.97672
TRPV1	4.58614	1.73115	0.673577	0.097633	0.206311	0.481693	0.650169	1.64454		FOSB	0.056911	2.12176	1.91317	0.449182	0.060259	0.843792	2.93958	1.71262		CACNA1A	6.04924	7.90384	5.93978	0.511449	2.86012	4.33695	5.00471	6.38664		CACNA1A	8.28932	5.52231	10.2785	0.485675	1.7907	3.35773	7.74398	5.77113		ME2	8.49867	10.2434	11.1804	1.64926	2.10435	7.15996	9.71748	7.54664
ME2	10.6923	13.5743	8.57168	0.592564	1.50646	6.04336	6.85228	7.96681		LGI4	5.00118	8.7904	5.62356	5.6745	4.37457	7.7279	6.91622	9.61086		FOSB	0	1.50509	0.653634	0.550707	1.96507	0.92671	0.782139	1.36802		FOSB	0.055702	1.95276	1.4205	0.147065	0	0.789832	3.65489	1.10711		CACNA1A	9.5596	3.82956	5.06352	0.446387	1.07441	1.70289	5.06147	5.48087
CACNA1A	12.7884	7.38063	10.505	0.405608	1.01307	5.20363	8.41604	5.79263		CHRNA4	9.00499	16.0276	18.9599	1.11089	2.02739	10.0764	11.4043	7.55946		LGI4	4.23321	7.1124	4.80425	3.1215	9.79453	6.93134	7.38051	9.93899		LGI4	3.40478	4.56402	12.3368	2.48824	10.1774	5.1589	7.82846	10.1432		FOSB	0	1.57552	1.58971	0.292627	0.152661	0.867339	2.00627	0.841961
FOSB	0	5.87525	2.20458	0.077078	0.080912	1.17559	3.53358	1.60425		MC3R	0	0	0	0	0	0	0	0.039664		CHRNA4	7.6186	17.8369	10.5859	0.41843	2.74637	8.19701	7.80433	6.98423		CHRNA4	8.42256	8.06435	18.9857	0.280206	4.6467	7.16632	8.07658	6.02345		LGI4	17.362	14.6455	4.00313	1.61101	4.55872	5.44205	6.00608	10.3857
LGI4	7.06404	4.11956	5.03361	1.24915	5.8564	6.06291	6.97182	15.3028		PDYN	0.226469	0	1.73835	0.121676	0.760612	1.81512	3.64148	0.638567		MC3R	0	0	0.095094	0	0	0	0	0		MC3R	0	0	0	0	0	0	0	0		KCNQ2	19.0488	10.7894	12.8612	2.84399	5.88476	11.7557	18.068	11.9918
MC3R	0	0	0	0	0	0	0	0.277754		COL18A1	0.606051	6.28039	2.10133	1.06851	0.524575	1.40706	1.72303	1.74016		PDYN	0.226564	0.856177	1.78007	0.146759	2.39089	2.3507	5.6704	0.677914		PDYN	0.845907	1.76079	3.97981	0.095492	3.90291	2.10102	7.36991	0.643089		MC3R	0	0	0	0	0	0	0	0
PDYN	0.989054	2.00645	1.92817	0.249181	1.51606	3.19173	4.5192	1.57997		ADSL	9.67263	14.7337	8.53604	7.07711	8.58331	8.2186	9.36635	5.3148		COL18A1	0.557344	4.2696	1.64265	0.796216	3.34206	1.13982	1.33804	1.84168		COL18A1	0.813499	2.37773	3.50394	0.30025	1.24437	1.51108	1.69308	1.77149		PDYN	0.411693	0.182335	5.48623	0	2.27495	2.74133	7.37221	1.0109
COL18A1	1.32171	6.31588	3.42461	0.614409	0.863731	1.22548	1.75254	2.23595		CACNG2	5.15205	3.54419	14.4408	0.947658	1.17146	2.86714	14.898	6.523		ADSL	11.2816	15.7654	9.23156	4.59124	10.5729	7.74999	8.04791	5.82549		ADSL	11.3607	18.4074	6.742	4.39499	12.5568	7.84284	8.07112	5.47797		COL18A1	1.1479	4.34715	1.47052	0.432964	0.563124	1.15654	0.651538	1.47299
ADSL	9.10841	14.765	7.77577	5.22207	9.62402	9.6535	8.12347	4.61845		PRODH	0.530291	1.42408	4.00806	11.1222	5.34323	5.53518	2.83802	17.4354		CACNG2	5.21674	5.39117	5.41523	0.246043	2.99944	3.6153	8.7013	6.4959		CACNG2	5.87088	3.24722	8.26481	0.172611	2.16374	2.56358	10.4385	5.72742		ADSL	11.2599	12.3975	9.42056	5.65666	10.9793	7.2828	9.91905	6.19327
CACNG2	6.90147	4.71538	10.9512	0.317282	1.39124	3.84653	14.0697	5.85892		AGTR2	0	0	0	0	0	0	0	0		PRODH	0.889055	2.00166	5.23964	8.43594	8.5813	5.00288	4.38699	16.6113		PRODH	0.459036	0.962031	6.00447	4.34157	8.32098	3.83586	3.89309	17.0356		CACNG2	10.5692	4.35248	7.88646	0.102515	1.06285	0.717888	9.51918	5.89599
AGTR2	0	0	0	0	0	0	0	0		ARX	3.6747	8.90157	8.60065	0.9509	1.20889	5.17143	2.96187	4.43348		AGTR2	0	0	0	0	0	0	0	0.041125		AGTR2	0	0	0	0	0	0	0	0		PRODH	1.60467	1.4412	3.82322	4.75478	5.44298	5.63435	2.49894	17.3979
ARX	12.643	10.5136	9.36958	0.225162	1.1996	4.21499	4.84809	6.93199		CDKL5	5.79451	1.06651	14.1587	0.443921	0.489918	4.57536	11.4577	2.78714		ARX	3.96216	11.1659	6.47294	0.515218	2.50885	3.07554	3.22022	4.14862		ARX	10.8514	8.24799	10.4495	0.232347	3.66899	3.36048	2.89626	4.77472		AGTR2	0	0	0	0	0	0	0	0
CDKL5	3.24523	3.67416	11.6822	0.66177	0.305764	5.83506	13.0755	2.7065		FLNA	8.67215	6.28858	7.36392	2.53304	0.721531	5.18038	8.44004	8.77063		CDKL5	2.21226	3.50296	2.84104	0.705952	1.2528	3.95743	9.36193	4.30363		CDKL5	3.98475	0.487498	4.14525	0.367273	0.136312	4.49355	11.0035	3.679		ARX	11.1367	11.3001	4.39275	0.176165	1.05993	2.57438	3.01003	3.57606
FLNA	13.827	7.09714	11.6603	0.814862	1.08817	5.55892	6.29886	11.7765		FMR1	10.7992	5.30013	15.1617	1.60862	2.95242	8.49011	16.0313	11.3213		FLNA	5.98876	7.97244	7.68298	1.15679	14.6747	4.7381	5.83246	12.2237		FLNA	13.0174	4.32059	8.49741	0.748162	2.15367	4.61482	8.39667	10.6298		CDKL5	2.12328	0.348249	6.23775	0.664868	0.119232	2.14385	9.45573	2.93034
FMR1	8.48228	6.95795	12.7177	0.87269	1.16415	9.45617	14.1904	12.2788		OPHN1	2.10891	0.992542	1.62025	0.340304	0.170981	0.733503	1.72336	1.85536		FMR1	9.20539	7.24134	10.7346	1.69701	2.4866	9.71824	14.1162	12.6345		FMR1	12.9485	4.31002	6.57735	0.976695	1.0907	9.01678	18.2137	11.7686		FLNA	19.2503	6.8324	6.27665	0.84377	1.25463	7.28329	3.86071	8.77307
OPHN1	2.16541	2.01685	1.30698	0.18323	0.175164	0.718226	1.3284	2.70776		PCDH19	11.8303	8.87819	14.0465	0.45916	0.194868	5.00172	7.15893	2.66177		OPHN1	1.9154	2.21974	0.746042	0.147215	0.193667	0.849581	1.89314	2.20383		OPHN1	2.40066	0.930796	0.921977	0.117639	0	0.958015	1.43071	2.49629		FMR1	7.1945	3.43998	14.0628	0.499263	1.20118	6.48002	13.4537	10.4743
PCDH19	12.8385	15.6803	16.6752	0.392233	0.121021	6.3048	8.84854	2.5415		PHF6	11.5931	5.95284	4.69314	0.380927	0.429251	1.93828	5.40307	3.12604		PCDH19	6.99114	15.6581	4.94011	0.547225	0.689348	3.49684	5.61752	3.65055		PCDH19	13.6531	6.27866	8.17008	0.226005	0.122048	3.55857	10.1471	3.52606		OPHN1	1.50663	0.33816	1.5862	0.04051	0.06892	0.650838	1.98457	2.6477
PHF6	8.74573	11.4016	3.65278	0.078863	0.172723	2.16149	4.93519	4.19024		SLC6A8	3.0811	5.73719	6.36394	1.81794	2.72184	8.05958	9.17423	14.7363		PHF6	8.51152	8.71347	1.30398	0.233492	0.445338	2.13771	4.59009	3.17887		PHF6	15.4704	5.78136	1.7918	0.153629	0.12815	2.7023	5.13717	2.82761		PHF6	6.57992	2.70389	4.17115	0.163048	0.092307	3.24918	3.79238	2.54946
SLC6A8	3.3307	5.15992	5.10825	0.659007	2.37777	8.13566	8.70073	11.4494		ABCB1	1.17345	2.30655	3.41105	1.73669	0.933582	3.48026	3.85492	4.69433		SLC6A8	2.46376	5.36263	5.38563	1.19191	5.25384	9.00195	8.83143	14.6084		SLC6A8	3.99467	4.22889	7.56287	0.706732	3.12538	9.8227	7.77729	16.901		SLC6A8	6.05133	4.64069	5.81004	0.763571	3.49594	6.55722	9.27566	16.0255
ABCB1	0.693959	2.92393	2.89856	1.04914	0.520461	3.06342	3.51162	4.33341		FGFR4	0.922394	0.174283	0.242652	0.082951	0.036246	0.038083	0.112079	0.07583
FGFR4	1.55396	0.217194	0.184492	0.028313	0.055251	0.041563	0.062525	0.133358		HTR2C	0.389748	0	0.905195	0	0.153401	0.914745	1.81211	0.614732
HTR2C	0	0	0.583938	0	0.030505	1.12505	1.54834	0.315057		KCNA1	0.610624	0.100002	5.11794	0.317861	0.330249	4.16608	12.651	3.54081
KCNA1	0.397893	0.230419	5.48126	0.289118	0.271031	5.10421	12.7525	1.15498
										110
110
[truncated: 52 more columns]

## Sheet: Highly Expressed Genes
Supplementary Table S4b. List of 42 highly expressed Epilepsy genes identified.
AF347015.2
APOE
AQP4
ATN1
ATP1A2
ATP6AP2
ATXN10
BRD2
CACNG3
CCM2
CDK5
CHGA
CNR1
CSTB
DCX
DPYSL2
FKBP1A
GABBR1
GABRA1
GABRD
GLUD1
GRIN1
HAX1
IDS
KCNJ10
MED31
NDUFV1
NPY
PAFAH1B1
PAQR8
PCMT1
PRNP
S100B
SCN1B
SEZ6
SLC1A3
STXBP1
SYN1
SYN2
TUBA1A
U2AF1
ZEB2
