# Supplementary material for: Expression Profiling of Autism Candidate Genes during Human Brain Development Implicates Central Immune Signaling Pathways
Source: PLoS One. 2011 Sep 15;6(9):e24691. doi: 10.1371/journal.pone.0024691 (PMC3174192; doi:10.1371/journal.pone.0024691)
Supplement: Table S5 — Temporal Expression Profiles by Region for all 32 Highly Expressed ASD genes. (XLSX) [file pone.0024691.s014.xlsx]

## Sheet: Sheet1
Supplementary Table S5. Temporal Expression Profiles by Region for all 32 Highly Expressed ASD genes.
NLGN3	21wg	24wg	4mo	6mo	4yr	11yr	15yr	23yr		CADPS2	21wg	24wg	4mo	6mo	4yr	11yr	15yr	23yr		FABP7	21wg	24wg	4mo	6mo	4yr	11yr	15yr	23yr		RPL10	21wg	24wg	4mo	6mo	4yr	11yr	15yr	23yr
DLPC	23.9632	41.2202	34.014	3.1878	5.47636	14.8797	23.393	32.3404		DLPC	0.115092	0.718415	6.62156	0.385539	0.927716	10.7205	12.0366	2.13841		DLPC	768.631	501.437	109.457	186.958	74.057	40.8956	30.9531	84.1628		DLPC	66.8165	302.496	20.4269	41.3247	85.4097	41.5991	12.9326	18.5288
VLPC	20.8816	46.0667	33.2646	8.87091	3.86896	13.8488	24.0731	27.0098		VLPC	0.333675	0.469855	8.54747	0.561938	2.65199	8.33658	15.4239	5.54091		VLPC	546.417	448.412	106.805	191.91	100.54	36.9145	45.4781	48.6811		VLPC	55.6717	335.815	16.0553	37.7838	33.6997	40.6512	15.0324	23.1832
MPC	22.2043	49.2988	21.8323	6.82578	7.61557	14.5192	22.6011	28.5895		MPC	0.256634	0.648199	3.85009	0.388989	3.2745	6.31064	7.32246	7.26441		MPC	686.184	356.16	129.598	191.707	117.418	58.7937	68.7847	44.1545		MPC	89.3403	287.556	40.0337	27.2412	94.9258	36.1109	17.5658	23.3487
OFC	24.0622	33.6349	27.6498	3.58977	8.88285	16.7293	25.7807	30.6503		OFC	0.243949	0.27081	4.14191	0.265995	1.07315	7.56344	10.3549	4.79577		OFC	932.008	623.448	61.0023	164.983	86.3117	36.9346	40.4455	39.9119		OFC	91.1535	371.55	20.7594	42.1073	75.6242	46.9965	8.61575	24.4949
Motor	21.946	45.1288	24.2449	5.49515	14.0457	17.1375	22.3744	27.1867		Motor	0.643124	1.27048	7.30516	0.362926	2.88457	10.1155	14.7057	5.61163		Motor	321.616	445.958	123.836	142.596	63.8265	35.7742	27.4007	40.0458		Motor	78.3805	361.651	29.0673	44.5741	62.9797	50.5897	19.7577	21.1761
Sensory	26.0014	49.3145	22.6247	1.37523	9.54594	13.3909	17.7898	25.909		Sensory	1.65251	1.75644	6.36182	0.384226	2.47739	9.99147	17.376	6.03566		Sensory	725.459	531.981	147.563	116.419	45.1658	39.7025	31.1334	45.7275		Sensory	53.997	244.427	32.9953	51.7477	30.2716	47.5407	20.7219	20.1999
PI Parietal	19.9478	35.6131	30.0157	3.12373	12.3167	13.4272	24.5337	26.8915		PI Parietal	0.603735	1.38314	4.19637	0.25494	3.93037	10.8674	15.7285	8.60843		PI Parietal	562.185	772.088	52.5832	183.694	54.4846	32.8482	29.2909	34.5744		PI Parietal	84.0085	267.767	22.1813	44.8398	30.8369	39.0095	14.0704	19.6918
Auditory	19.5974	46.6589	20.5455	4.24356	10.8051	14.4635	21.9352	28.7357		Auditory	0.828508	2.15183	8.5533	0.285136	3.44525	13.5546	11.8722	5.39194		Auditory	508.716	820.574	209.191	123.603	64.6897	28.7883	33.6119	43.2838		Auditory	69.2984	303.069	31.6691	40.903	46.7048	28.3991	21.0108	23.0797
PS Temp	52.5172	29.2637	19.7776	2.8359	5.29025	8.23523	19.9952	30.3564		PS Temp	0.734519	1.20781	8.72771	0.466373	1.21325	7.38201	15.6842	4.62436		PS Temp	1067.47	827.161	145.02	169.919	144.848	81.3634	33.9417	35.4204		PS Temp	162.129	424.579	33.9717	34.3972	92.7555	58.5983	22.616	22.7528
IL Temp	44.2243	44.5441	16.6368	2.56303	12.8653	7.07341	25.7053	33.7663		IL Temp	0.201278	0.701919	5.70814	0.392036	3.94664	6.74909	9.54655	3.20666		IL Temp	634.771	561.527	198.754	177.717	59.1036	117.073	37.3239	70.3101		IL Temp	167.762	278.184	34.757	27.6503	40.5476	55.1599	23.4361	23.5531
Visual	21.5256	41.6587	12.7448	0.762185	4.31128	14.8861	21.3515	25.8031		Visual	1.03052	1.80234	13.3662	0.189132	1.65261	14.8684	21.6676	2.26054		Visual	700.14	832.103	29.108	118.257	62.2564	13.7033	13.9197	26.6716		Visual	90.469	349.277	25.7981	38.7422	56.8413	40.9614	16.2034	21.159
Hippo	30.6777	51.8998	5.43292	6.44452	19.929	5.65632		31.343		Hippo	4.58071	3.14451	7.12387	0.480647	2.76631	5.67658		2.20337		Hippo	188.235	358.671	29.1938	102.679	120.423	188.622		47.3147		Hippo	78.3861	302.247	59.8711	24.9565	25.6004	83.0631		29.5313
Amygdala	25.0081	43.585	10.3552	4.45205	8.8991	12.1828	34.7785	31.4788		Amygdala	1.35841	0.345657	17.4056	0.277283	1.3841	6.4885	4.24936	1.58834		Amygdala	315.491	1075.54	18.1956	88.324	125.074	72.4433	40.0548	70.8847		Amygdala	107.067	501.901	22.1074	25.6847	88.3043	30.8326	19.8011	29.5681
Striatum	28.21	52.0413	11.6161	1.01467	11.2454		29.1949	26.0513		Striatum	0.528948	0.826446	17.4444	0.131744	0.490999		0.678041	1.37279		Striatum	201.412	211.142	15.6313	57.4789	42.8588		23.1904	19.7075		Striatum	97.6414	300.673	28.6496	29.4017	61.0986		21.6439	27.589
Thalamus	32.441	53.808	6.28238	3.6906	17.3888		25.2759	22.0854		Thalamus	0.877706	0.860564	4.70268	0.362235	0.758583		1.40392	0.842671		Thalamus	410.88	466.894	55.0023	61.5431	53.3242		11.1	16.8883		Thalamus	37.0154	129.102	36.5038	24.5537	43.0853		12.5803	21.6869
Cerebellum	35.2607	60.269	1.29078	4.83985	18.0521	21.273	20.856	32.1751		Cerebellum	8.98036	4.53805	0.868294	4.21057	34.6675	68.3244	65.9318	41.1366		Cerebellum	326.037	523.823	70.178	171.036	199.09	72.9779	117.711	108.55		Cerebellum	88.2365	272.763	80.6876	187.222	135.505	42.6984	53.1978	57.5367
RELN	21wg	24wg	4mo	6mo	4yr	11yr	15yr	23yr		CDH22	21wg	24wg	4mo	6mo	4yr	11yr	15yr	23yr		GNAS	21wg	24wg	4mo	6mo	4yr	11yr	15yr	23yr		SEZ6L2	21wg	24wg	4mo	6mo	4yr	11yr	15yr	23yr
DLPC	4.01197	10.0656	7.41706	0.17044	0.101002	0.87817	1.32868	2.93358		DLPC	6.22511	6.71468	13.4464	0.417601	4.18358	18.6436	27.8484	11.7634		DLPC	159.286	252.743	208.306	35.3449	77.2107	124.933	181.109	162.483		DLPC	38.989	80.0677	81.7968	2.0257	17.2516	82.8356	72.4499	28.4765
VLPC	3.69028	7.70864	8.92515	0.265093	0.457122	0.79132	1.80624	3.2806		VLPC	2.49965	6.01924	12.0511	1.07799	4.21495	15.7589	18.899	16.2342		VLPC	137.799	289.662	192.336	80.0852	83.175	113.244	174.188	185.13		VLPC	27.0037	96.8562	79.1652	6.1396	10.8991	75.9117	53.0922	45.2977
MPC	1.58686	7.89325	5.29784	0.209776	0.343449	1.30262	1.4775	2.43917		MPC	2.46006	4.96428	6.63197	0.26903	6.71091	11.6329	11.0924	15.4116		MPC	170.258	251.678	203.763	52.5154	112.193	143.062	148.47	178.517		MPC	27.9821	81.6663	60.0157	2.16487	26.8541	49.5816	34.3807	47.6963
OFC	2.4284	2.71256	4.07051	0.097254	0.143003	0.851213	1.73031	3.61004		OFC	3.08466	4.49403	11.7671	0.114222	9.35661	10.9572	21.7279	15.7572		OFC	174.605	270.911	148.26	33.7042	102.175	110.276	165.843	160.904		OFC	30.8715	78.5911	82.9893	1.2816	31.8279	54.6129	67.2132	40.1717
Motor	3.55481	6.2232	6.95792	0.232633	0.356839	0.56729	1.41994	1.52212		Motor	5.32545	8.29564	7.84277	0.210105	8.20922	12.9911	19.1621	15.4228		Motor	135.649	268.577	193.361	42.4454	124.367	124.793	180.804	178.193		Motor	52.3049	82.1458	51.5682	1.91712	36.548	65.0764	56.4476	43.2189
Sensory	2.66607	9.46079	4.35895	0.055422	0.287189	0.635261	0.983249	2.01884		Sensory	3.09838	4.57102	8.29155	0.164973	12.2488	11.517	11.1304	11.9128		Sensory	168.793	266.519	214.18	23.5167	97.0292	100.763	182.706	186.453		Sensory	52.6219	89.393	41.0063	1.9679	39.664	52.9841	41.6449	36.3541
PI Parietal	1.99924	3.86366	8.89044	0.184311	1.47694	0.697897	1.19236	1.41532		PI Parietal	1.17988	1.82751	13.1946	0.072133	9.77049	14.7888	16.9116	10.3052		PI Parietal	120.126	251.023	133.192	33.9449	91.6835	103.143	164.924	193.782		PI Parietal	45.7135	88.4897	88.4017	2.01686	54.1279	58.4748	56.4312	41.706
Auditory	4.25107	7.80801	9.05851	0.133736	1.06226	0.947875	1.01833	2.60281		Auditory	1.58689	2.82767	4.02849	0.049388	10.0727	11.9484	24.9565	9.92345		Auditory	98.432	259.555	175.393	40.6584	87.9905	136.507	189.825	177.736		Auditory	35.1825	80.5745	35.2232	1.96721	44.4011	55.9846	63.6024	33.8128
PS Temp	2.84362	2.27636	5.60832	0.380237	0.207599	0.932895	1.24137	1.19153		PS Temp	3.30487	2.053	5.87035	0.119937	4.10552	11.2774	12.947	11.2437		PS Temp	297.779	286.81	186.424	36.1834	76.197	65.0129	162.138	159.263		PS Temp	71.0926	75.2494	40.403	3.14858	9.99596	32.3018	45.3405	39.9683
IL Temp	4.78386	11.4423	4.74502	0.282141	1.26579	0.325117	1.49062	4.88204		IL Temp	1.66254	1.46313	3.5638	0.087747	8.70059	6.85788	17.3673	14.6806		IL Temp	268.526	262.744	170.403	29.747	103.749	38.971	152.553	132.749		IL Temp	58.6039	73.8451	24.8636	2.07902	56.542	22.0932	51.3965	28.5241
Visual	1.16593	5.08672	1.69004	0.211453	0.172212	0.525665	1.35562	0.382598		Visual	0.905984	2.21357	19.6223	0	5.39534	11.1888	14.8803	1.35468		Visual	111.66	234.278	213.834	12.6684	69.1661	183.975	206.781	98.3923		Visual	28.3831	72.3646	70.6781	1.17959	19.9157	63.5142	69.0342	13.9481
Hippo	4.54657	8.95804	0.344491	0.304273	0.518119	0.409872		1.01878		Hippo	1.06921	2.77738	19.0768	0.05881	3.14997	2.43877		2.7218		Hippo	163.396	259.873	256.684	35.4924	121.424	32.7981		91.9404		Hippo	47.9457	64.8308	38.2995	2.33024	34.1845	17.7862		17.7834
Amygdala	4.95755	0.43175	1.15329	0.082737	0.329478	4.03588	2.78034	1.04394		Amygdala	2.20907	0.680455	21.53	0.3327	5.1607	9.58456	23.1417	2.17472		Amygdala	168.04	305.763	244.031	34.7974	106.965	167.603	136.416	88.6526		Amygdala	37.5373	30.0636	72.4312	1.51336	17.0191	30.295	48.9501	12.0335
Striatum	6.76805	9.94777	1.18493	0.030905	0.411626		2.97026	0.842133		Striatum	1.81194	2.8198	20.0909	0	4.18521		7.20914	2.02334		Striatum	164.852	256.696	259.519	11.9399	54.4804		59.656	49.7107		Striatum	49.2455	57.5049	78.5621	0.182377	12.6521		35.077	14.8816
Thalamus	3.68845	4.10153	1.82657	0.009844	0.489093		0.850884	0.275827		Thalamus	6.78189	6.34574	15.1192	0.412428	7.19543		13.8337	1.05296		Thalamus	211.328	314.194	170.371	46.8838	189.09		220.793	70.8486		Thalamus	56.8503	115.863	29.6857	5.26513	43.3584		84.6615	9.97639
Cerebellum	45.8942	26.1778	0.098539	2.62411	11.0462	91.6299	74.732	38.7152		Cerebellum	8.32892	11.3838	4.03335	12.9551	42.1	43.0948	62.1769	62.3126		Cerebellum	125.838	208.131	94.5614	96.9388	179.951	167.515	181.018	206.718		Cerebellum	18.4395	37.552	8.2037	32.8064	49.5227	63.051	101.208	85.1599
CADM1	21wg	24wg	4mo	6mo	4yr	11yr	15yr	23yr		DHCR7	21wg	24wg	4mo	6mo	4yr	11yr	15yr	23yr		GPX1	21wg	24wg	4mo	6mo	4yr	11yr	15yr	23yr		TSPAN7	21wg	24wg	4mo	6mo	4yr	11yr	15yr	23yr
DLPC	23.5759	22.6314	29.5484	4.21011	2.54499	7.69246	20.9638	31.2215		DLPC	20.7597	47.7788	12.09	4.38174	6.60365	16.511	18.6061	21.2889		DLPC	25.7603	118.122	41.6915	71.2556	181.384	84.7673	45.0796	44.194		DLPC	44.165	88.2341	164.036	17.2682	27.1202	190.628	189.04	158.182
VLPC	24.6501	19.7636	32.7096	6.02181	2.7715	7.22181	18.0345	20.7717		VLPC	20.3217	51.3817	9.80234	10.8586	4.13674	18.3858	13.7345	24.9216		VLPC	18.261	137.036	31.5737	76.3144	69.4785	102.368	52.227	59.2597		VLPC	47.1927	98.7941	164.792	54.0993	65.7009	178.171	195.192	203.227
MPC	23.7481	31.0339	16.9102	5.72304	4.72204	7.84204	21.9081	24.5413		MPC	18.2801	47.4719	9.23751	5.6026	10.4596	16.6796	14.3217	24.9635		MPC	21.6264	104.663	49.1252	55.6954	205.257	49.8352	42.4151	56.9675		MPC	59.5428	96.5092	155.943	34.4799	54.1626	175.053	175.891	219.694
OFC	29.7607	14.926	16.7577	3.39225	4.1434	8.26716	23.2198	25.1231		OFC	17.2142	45.94	16.6451	2.94749	12.0576	20.8837	15.2748	25.3715		OFC	26.8265	130.599	66.7484	60.8584	251.232	66.0508	47.2329	50.2705		OFC	54.4339	82.9883	144.476	20.2096	60.8054	165.616	185.206	191.648
Motor	15.7112	21.3745	21.4673	4.53163	3.61419	7.20818	17.8619	25.0355		Motor	28.4895	57.7782	11.2752	7.63242	12.3309	23.5371	15.9876	24.6188		Motor	37.1184	148.802	31.8698	47.0993	153.816	70.6148	57.8715	55.6381		Motor	56.7984	112.659	165.979	40.2276	88.7786	185.067	167.213	202.588
Sensory	24.5258	20.0859	20.6	2.86841	3.4898	7.24215	13.2974	21.7047		Sensory	23.553	53.2171	10.1556	3.26898	9.78327	15.8181	11.1922	22.8207		Sensory	36.3703	120.052	36.8946	73.2358	170.659	66.2548	60.9122	48.1137		Sensory	43.4922	91.1309	174.006	10.7608	82.7308	157.726	190.358	198.724
PI Parietal	14.1265	25.0859	13.0895	3.20395	5.04188	5.83331	18.336	23.4448		PI Parietal	19.2367	43.5276	18.6177	3.21662	12.1021	16.8749	13.3972	21.5733		PI Parietal	32.84	130.036	46.6446	56.6263	118.626	73.7301	37.457	44.5374		PI Parietal	32.0175	118.826	134.415	23.3827	107.158	143.454	216.805	209.424
Auditory	15.6423	26.9816	18.0936	3.79305	3.89604	6.06262	16.9992	23.2287		Auditory	21.985	51.9661	9.45553	7.02876	10.4657	14.6023	16.577	21.9352		Auditory	25.0935	124.225	28.1118	59.7947	149.226	46.7885	106.128	49.5482		Auditory	36.923	100.236	150.204	27.7077	89.0627	159.976	187.036	178.14
PS Temp	37.7669	9.09609	19.8178	3.203	2.84396	4.56658	16.0856	21.0696		PS Temp	32.2205	34.7458	6.64956	3.01875	6.14647	12.936	11.3817	24.5617		PS Temp	46.8927	155.924	38.9264	56.2894	191.858	116.533	48.373	56.2882		PS Temp	78.8918	68.971	154.828	25.5269	41.3762	114.901	232.772	195.814
IL Temp	54.4792	35.52	20.7785	3.49842	5.73748	8.05839	21.3314	28.5489		IL Temp	26.6291	40.9058	6.3914	3.4595	11.4415	11.3742	12.2545	20.1862		IL Temp	47.8704	99.7	31.1211	46.9735	149.951	116.207	47.1694	45.4453		IL Temp	69.5007	76.1649	122.372	13.6584	98.0899	120.136	201.155	204.488
Visual	13.7818	13.4025	12.493	3.24844	1.95356	4.77289	13.6402	19.6825		Visual	14.499	37.2052	8.29539	2.34746	6.48091	16.3209	10.4775	22.0262		Visual	25.6271	112.842	63.2805	64.2495	251.038	64.0544	41.6326	33.5839		Visual	50.2389	113.511	228.562	3.78559	35.7482	177.847	188.577	130.497
Hippo	34.9734	58.7076	2.69786	3.49687	4.54805	9.41928		16.6678		Hippo	19.3796	49.885	8.14206	5.44054	18.0242	17.315		22.4558		Hippo	27.5318	112.637	168.327	36.0912	59.4387	117.492		43.8213		Hippo	119.343	186.418	120.742	21.2639	70.3104	95.3566		119.382
Amygdala	36.8368	54.9592	8.52045	2.81129	4.08566	7.57684	37.7263	17.0914		Amygdala	19.1649	40.5307	7.9853	4.57348	11.7679	11.7783	20.7374	22.959		Amygdala	31.3363	129.404	58.416	38.0141	147.46	40.8852	27.5402	38.7046		Amygdala	48.0955	83.2926	223.393	14.0679	45.6799	82.5915	181.569	88.7382
Striatum	39.241	55.0699	8.46317	2.29699	3.91781		23.5905	24.2394		Striatum	15.1619	30.8398	10.8815	0.733759	9.26014		12.8126	13.9205		Striatum	35.5803	80.8497	65.0003	59.4081	59.2697		45.8637	34.6743		Striatum	85.4145	178.116	219.38	3.15727	116.232		175.871	145.223
Thalamus	29.4528	22.3275	6.77811	1.75963	8.34757		20.5114	6.54108		Thalamus	35.0444	77.2409	7.92786	5.62461	17.7527		14.145	24.0229		Thalamus	47.6586	217.294	59.1949	49.9209	93.6979		35.8766	34.5043		Thalamus	81.5675	167.508	131.717	11.3621	116.388		166.835	42.3096
Cerebellum	14.9931	14.8786	1.86771	5.68178	18.4801	43.8729	74.5791	48.3674		Cerebellum	43.1982	125.532	2.5164	8.13946	26.6252	14.2245	10.505	17.4242		Cerebellum	30.3891	104.162	149.702	160.216	112.142	24.6797	46.9602	48.9387		Cerebellum	101.873	165.488	24.5974	28.1498	160.799	214.412	242.568	243.047
CNR1	21wg	24wg	4mo	6mo	4yr	11yr	15yr	23yr		ADORA2A	21wg	24wg	4mo	6mo	4yr	11yr	15yr	23yr		HNRNPH2	21wg	24wg	4mo	6mo	4yr	11yr	15yr	23yr		PDZD4	21wg	24wg	4mo	6mo	4yr	11yr	15yr	23yr
DLPC	39.5454	43.0473	23.5457	0.311366	0.385653	10.6951	22.3633	9.20302		DLPC	4.99823	6.48286	2.62582	1.19004	1.67962	2.32344	2.66207	2.72219		DLPC	39.9244	58.1219	63.9574	1.43613	8.13526	52.5577	57.0548	38.9447		DLPC	203.206	169.879	321.056	12.6773	65.1429	161.85	238.858	192.517
VLPC	42.5465	25.5675	30.0494	0.131208	0.920817	9.21342	24.0531	7.59655		VLPC	3.09659	5.96045	3.18925	2.15575	1.38993	2.05934	2.21752	2.37085		VLPC	56.677	58.5855	69.1661	5.43775	22.0919	50.2258	50.7133	64.8434		VLPC	114.167	167.018	276.062	36.5706	85.9808	189.041	199.804	148.828
MPC	24.3321	46.2114	9.83085	0.71215	2.28787	7.57418	18.7918	9.64302		MPC	2.33009	7.12419	2.22574	1.54676	2.76814	1.18459	1.99075	1.61723		MPC	65.434	55.5463	60.3226	5.67409	10.4742	51.9432	47.3681	65.7269		MPC	121.998	182.697	213.03	12.3618	100.016	144.319	148.655	151.26
OFC	58.4491	20.2214	22.5488	0.238124	0.299174	9.45045	23.1369	10.9301		OFC	2.84097	5.13849	4.08399	0.99686	2.35162	2.03803	3.05511	1.89175		OFC	60.0234	51.3012	29.9648	2.32442	6.49799	52.2982	54.1228	59.8475		OFC	153.969	133.312	244.61	8.71982	117.809	138.051	220.363	159.728
Motor	35.9036	24.9908	20.7156	0.1235	1.52478	8.43923	15.5052	5.14825		Motor	3.30714	9.51918	2.55643	1.50845	3.86678	2.29888	3.5878	2.57554		Motor	40.6352	59.1175	63.9412	4.77184	12.1827	50.3399	49.2537	53.3184		Motor	156.122	150.178	223.864	9.8433	122.692	138.461	204.06	160.572
Sensory	29.2806	35.349	20.116	0.159521	1.32562	6.53342	12.9373	5.23866		Sensory	3.15158	5.9429	2.31825	1.12073	3.02529	1.79595	2.37935	1.93561		Sensory	30.0878	52.0632	71.6956	1.14208	10.4358	49.1708	50.7508	60.9442		Sensory	256.388	221.693	215.12	4.00615	105.902	137.451	149.532	118.814
PI Parietal	27.9372	33.5965	30.3942	0.068534	5.988	7.95518	17.5261	5.08948		PI Parietal	2.12403	4.47781	4.94259	1.29655	2.91325	1.94914	1.70343	1.90019		PI Parietal	28.4589	64.0283	33.5678	2.94978	13.5628	49.0086	61.7108	70.3679		PI Parietal	167.96	191.399	222.288	6.14307	89.5592	148.484	151.212	118.974
Auditory	39.8764	29.87	16.8113	0.284385	2.77526	8.59945	20.3327	5.56943		Auditory	3.447	4.75326	4.01724	1.26109	2.90202	1.2086	4.53412	2.43551		Auditory	27.9881	61.6597	61.8364	2.54286	11.7753	53.0483	44.756	59.9627		Auditory	117.644	176.021	148.13	8.97969	97.4184	159.515	266.666	133.605
PS Temp	32.1731	9.47575	19.9339	0.633541	0.502809	6.74015	19.3018	5.40078		PS Temp	8.55013	4.86163	2.93481	0.769657	5.69681	3.23338	1.76296	2.53282		PS Temp	50.2753	41.768	71.4167	2.79788	7.49629	35.6247	57.4627	50.9021		PS Temp	287.967	155.34	213.613	8.43084	88.8288	184.918	131.446	134.323
IL Temp	50.7814	46.0872	15.7965	0.309003	4.89739	6.52479	19.8722	13.2275		IL Temp	7.25448	3.66803	1.5227	1.17107	2.90786	1.882	1.81055	1.48281		IL Temp	53.041	57.7396	65.9859	2.24631	14.6262	39.991	55.7572	46.1719		IL Temp	262.417	178.353	179.072	7.73039	104.274	101.107	165.707	157.588
Visual	35.1663	38.2617	12.3889	0.075832	0.143732	4.20805	12.2589	1.95077		Visual	3.75215	7.79514	1.37426	0.662175	2.04084	2.21547	3.39524	4.62375		Visual	35.4688	58.2703	81.7959	0.963025	3.6241	45.4151	50.6395	33.6888		Visual	121.65	149.132	217.777	2.54814	71.7785	202.898	175.549	35.6955
Hippo	34.3943	39.4741	1.01738	0.629817	1.33366	3.14637		3.43633		Hippo	4.18998	5.3312	2.00339	1.26247	5.15492	0.871621		2.59862		Hippo	46.6008	63.984	33.3694	3.39676	14.5653	35.5154		39.3063		Hippo	130.491	85.771	241.06	9.54955	215.933	48.4032		68.472
Amygdala	28.2012	73.9285	8.76872	0.492028	0.482255	3.92649	16.6819	2.63222		Amygdala	5.74979	5.94915	1.55501	1.08126	2.79608	2.98183	18.1513	3.49704		Amygdala	30.3793	49.2839	83.9492	3.35037	9.96728	42.9161	55.143	35.3108		Amygdala	140.305	78.2523	193.601	7.74332	86.3698	91.5914	117.004	44.0734
Striatum	10.6062	21.5838	6.74742	0.520475	2.26558		24.3095	3.38739		Striatum	17.448	31.6378	1.84991	1.42377	142.26		180.674	46.0699		Striatum	28.644	51.8992	82.9076	1.1819	18.4815		27.853	35.2597		Striatum	253.376	173.962	215.332	2.04503	122.426		206.007	68.5192
Thalamus	4.42979	3.88825	5.38584	0	0.112556		0.688262	0.224884		Thalamus	5.26362	6.82434	1.11478	0.563404	2.55485		2.58184	4.24829		Thalamus	33.9055	51.5341	55.1256	3.10572	31.7484		42.101	25.478		Thalamus	118.902	76.5395	227.006	4.86744	28.7012		49.3632	14.8031
Cerebellum	92.8696	94.6277	0.221869	1.49914	8.30113	46.623	37.28	39.5126		Cerebellum	5.81651	6.37557	0.839084	1.48437	2.94531	3.88934	4.29336	2.82568		Cerebellum	36.4859	51.1092	8.16155	5.79934	35.7027	60.409	63.2251	59.2711		Cerebellum	136.216	114.099	64.0408	43.4161	99.3661	119.819	127.773	122.001
MAP2	21wg	24wg	4mo	6mo	4yr	11yr	15yr	23yr		PCDH10	21wg	24wg	4mo	6mo	4yr	11yr	15yr	23yr		HRAS	21wg	24wg	4mo	6mo	4yr	11yr	15yr	23yr
DLPC	63.1754	86.3204	175.588	3.46169	3.56332	82.5126	164.434	71.6167		DLPC	37.7541	48.0946	37.2962	1.20121	2.7223	25.0347	39.4809	23.8486		DLPC	48.8474	67.4486	54.9402	21.847	75.6027	68.6465	55.7741	65.4779
VLPC	99.9782	45.5837	192.423	4.35603	5.61481	74.9497	176.88	51.5358		VLPC	33.5912	46.3546	37.9075	3.67558	4.0958	23.1699	35.0989	23.1431		VLPC	31.5875	76.9219	47.8989	37.5437	67.1727	64.3564	48.8522	49.5434
MPC	61.6825	85.3587	52.8584	4.97548	21.0487	80.0605	165.461	77.6821		MPC	21.1128	42.7714	18.6664	2.32772	6.69314	19.964	30.2942	26.755		MPC	42.0178	63.5954	52.5434	21.6202	83.4509	60.3138	47.4987	46.6877
OFC	90.1058	29.3565	73.4003	2.81505	1.99017	63.6365	166.419	67.8886		OFC	40.6653	37.0847	30.4532	0.929161	5.90278	24.7568	36.1427	27.2204		OFC	45.3624	71.4614	44.3887	16.2598	85.5871	56.5851	51.5211	49.8091
Motor	56.4216	66.4628	187.261	2.83172	3.03131	69.69	146.633	58.8629		Motor	32.4958	31.7395	27.2532	1.97022	8.32216	24.0794	33.7178	22.3353		Motor	48.7465	73.7027	46.6747	16.8347	80.1228	64.5225	53.1665	49.1981
Sensory	59.3261	86.0467	168.864	1.07794	2.39417	71.0058	139.066	47.739		Sensory	22.5417	28.4415	25.5908	0.650707	6.3473	20.6324	21.6957	21.2214		Sensory	61.0711	63.9409	51.815	11.9478	75.7155	63.7628	36.5506	47.4031
PI Parietal	40.8899	78.6678	97.9246	1.61445	10.2313	66.544	151.012	61.102		PI Parietal	13.451	22.0761	31.1915	0.870544	13.8593	19.0014	28.456	17.783		PI Parietal	42.9138	70.5403	49.9838	13.2824	77.6206	49.0269	43.7585	34.4184
Auditory	53.7891	81.9017	111.928	3.18337	3.9231	115.263	108.208	39.8512		Auditory	11.4864	18.8959	22.4805	1.15143	9.6823	18.9237	30.3563	19.8831		Auditory	36.0172	58.4422	35.9208	17.8071	58.8786	46.3742	65.2064	42.0101
PS Temp	59.5741	14.2601	130.211	4.5476	2.26514	59.5003	140.976	47.8224		PS Temp	20.6153	11.0187	19.9186	1.02853	3.11883	13.6133	24.5403	23.8168		PS Temp	97.3735	76.2188	48.7304	18.3124	76.8157	73.1712	45.2438	43.9641
IL Temp	69.7459	92.939	133.959	4.27651	10.723	37.3327	147.571	78.194		IL Temp	29.021	26.6696	16.2402	0.762209	13.9683	10.758	28.593	21.0697		IL Temp	85.2779	53.3867	41.6449	11.614	64.3746	68.9371	44.5126	40.7254
Visual	57.069	50.8704	144.617	3.36268	2.00773	93.8223	157.821	9.86765		Visual	13.9687	28.2357	23.3368	0.579169	3.52963	19.5367	25.5168	12.9073		Visual	27.2983	57.723	50.9841	10.9296	46.8017	50.0734	36.6884	24.281
Hippo	61.1268	53.9447	10.7389	4.2242	5.34	15.7643		24.2476		Hippo	12.9769	24.5206	7.72104	1.61237	6.22624	7.89501		18.3561		Hippo	39.5269	56.2056	76.3807	14.9957	82.9909	81.3373		37.9857
Amygdala	41.437	64.929	130.836	3.98134	2.75096	37.9935	127.104	14.0697		Amygdala	15.0328	12.799	18.48	1.12251	4.98658	9.18206	35.939	18.5134		Amygdala	39.077	39.1105	44.1578	13.4838	85.0996	47.6893	37.8277	27.5526
Striatum	34.9552	95.1246	112.741	2.38808	2.81537		42.3813	17.0737		Striatum	63.6648	108.495	18.2826	0.579199	10.3767		44.1735	24.7759		Striatum	48.232	55.6626	50.0401	11.5298	130.338		88.8977	51.14
Thalamus	57.37	28.4026	72.9582	2.36384	6.5258		57.9651	6.11265		Thalamus	42.9445	48.3421	10.2641	1.38808	11.8302		19.068	14.5774		Thalamus	60.2705	130.48	60.5541	24.2576	71.4584		52.5843	23.8746
Cerebellum	46.9578	42.0707	2.7049	1.90534	4.00076	45.314	51.3569	30.3954		Cerebellum	6.69073	12.2623	1.83278	0.97156	1.35939	2.32287	3.17683	4.25013		Cerebellum	46.5913	73.6117	61.3265	63.2312	78.4675	46.6399	49.5435	46.2397
PRKCB	21wg	24wg	4mo	6mo	4yr	11yr	15yr	23yr		HLA-A	21wg	24wg	4mo	6mo	4yr	11yr	15yr	23yr
DLPC	10.4249	11.4824	79.0583	4.11833	9.4702	68.9374	97.7979	24.8986		DLPC	7.58894	40.8625	40.7526	28.5089	36.7463	42.4913	29.0021	31.287
VLPC	24.5873	11.8149	88.4229	7.21972	21.5445	59.6804	105.557	42.0745		VLPC	5.87144	47.8668	38.7042	48.9312	27.0661	44.529	26.4031	32.6213
MPC	17.2034	12.4789	42.1672	2.8842	20.5603	58.8743	79.3384	49.5381		MPC	7.95286	39.0114	47.3287	35.0981	52.719	31.8882	29.2697	30.8095
OFC	10.856	7.80091	48.0542	2.512	15.7783	55.39	92.7334	37.2054		OFC	10.8138	39.3899	48.6128	23.2733	46.5763	37.633	29.9826	29.9296
Motor	28.8325	19.2954	77.8764	3.23389	22.4761	71.1658	87.0213	44.1187		Motor	7.53034	59.3777	36.4006	35.3091	41.8936	41.6989	37.0353	38.4028
Sensory	31.5193	28.794	71.5078	4.89792	22.1581	64.1659	78.4783	41.5469		Sensory	10.6261	44.3756	42.5385	28.482	34.2766	34.4393	28.7818	29.5627
PI Parietal	14.7389	19.6613	66.5204	4.67106	28.2497	62.6729	89.9405	42.647		PI Parietal	8.10469	43.1133	38.3162	31.1434	37.0871	37.3476	25.9768	25.1162
Auditory	15.1637	15.4822	45.4674	3.55421	25.3911	77.8978	76.5697	29.4195		Auditory	4.57139	38.5418	39.4291	32.9842	39.2606	25.5354	40.6107	34.0854
PS Temp	13.8959	7.12337	61.2868	5.47189	16.9278	52.2919	91.8742	30.3813		PS Temp	15.8997	42.9971	43.477	27.043	39.3145	49.6938	26.8641	28.7234
IL Temp	10.4622	12.1739	52.4548	2.63654	27.4236	38.8526	88.0094	34.6434		IL Temp	20.0971	37.0635	33.6941	19.5166	45.8484	40.0378	30.5949	34.5599
Visual	15.3263	13.4397	66.9315	1.33987	17.1756	62.5588	84.8588	11.2095		Visual	11.2755	47.7254	32.1569	21.3447	36.4694	37.8148	24.0506	36.3224
Hippo	13.4573	9.00611	38.3398	1.31796	14.4451	19.6581		13.4306		Hippo	26.1049	72.0308	55.0487	23.5322	40.8264	67.6696		43.2096
Amygdala	7.44977	1.33038	72.226	1.18364	8.573	12.4725	30.1744	5.98729		Amygdala	14.7014	60.3936	20.7388	22.2223	52.6385	35.3913	41.3321	45.6339
Striatum	10.3995	20.6534	69.1694	0.89124	31.312		64.1263	19.6245		Striatum	17.2323	58.6242	31.088	18.2906	41.9783		59.2926	39.8082
Thalamus	5.41145	5.5089	32.0667	0.768286	7.73721		17.9325	2.07703		Thalamus	14.848	76.1205	29.4239	27.7556	47.6796		29.0948	42.1754
Cerebellum	39.7422	49.3185	9.4382	9.32011	12.0349	13.4701	20.0842	6.39046		Cerebellum	26.9458	58.039	38.4074	74.5291	98.0879	53.1473	67.6927	35.4113
MEF2C	21wg	24wg	4mo	6mo	4yr	11yr	15yr	23yr		DLX1	21wg	24wg	4mo	6mo	4yr	11yr	15yr	23yr
DLPC	171.963	267.865	162.698	4.82204	5.02882	73.3029	112.509	31.73		DLPC	14.4311	17.2006	11.3114	0.244464	0.741582	3.84835	2.45243	6.03774
VLPC	239.85	158.605	191.22	7.6271	6.33252	58.3713	93.4269	36.1586		VLPC	7.10068	12.5729	7.76136	0.628739	1.93179	3.7137	3.78647	3.9377
MPC	128.848	216.023	65.2427	6.6792	18.4376	46.4061	69.8423	46.5281		MPC	7.25165	15.9777	8.01556	0.111566	1.49704	3.24987	3.7419	3.44892
OFC	217.875	123.063	78.834	4.00772	4.12303	53.4629	106.756	39.4939		OFC	15.1126	10.7382	7.29877	0.188288	1.52767	2.90721	3.72558	2.40785
Motor	139.24	139.021	129.637	2.83794	7.44494	48.4143	67.4472	30.6988		Motor	8.61394	11.2036	6.1729	0.174129	2.82994	2.10511	3.47361	3.41865
Sensory	201.335	278.83	136.352	2.99032	5.53307	49.8045	72.0964	30.2384		Sensory	13.841	14.4328	6.22767	0.224916	2.92475	2.41614	3.10674	2.84942
PI Parietal	150.769	284.551	106.377	3.29957	21.8032	56.5856	93.0358	44.4515		PI Parietal	8.02706	10.6893	7.8779	0.196806	3.61372	2.85426	4.11405	2.60258
Auditory	169.653	317.132	81.6851	4.68173	10.7834	61.5028	74.7846	29.7987		Auditory	10.548	12.849	5.45869	0.246877	2.73686	3.18015	5.10672	2.59342
PS Temp	310.061	78.6858	127.811	4.31031	3.67519	36.2251	96.0986	29.3264		PS Temp	18.2601	15.1286	7.72606	0.197161	1.31156	4.15149	3.34153	2.45869
IL Temp	192.48	286.392	97.8852	5.51228	20.9693	34.8693	97.279	28.6917		IL Temp	26.1962	21.8685	5.727	0.207536	4.07646	2.03133	3.32369	3.20052
Visual	196.349	174.725	84.0987	5.38695	3.44736	41.7563	110.536	11.1441		Visual	10.1815	15.0145	4.10175	0	1.06531	3.40884	4.00144	1.36574
Hippo	5.7644	18.427	10.5046	3.06118	2.30591	4.1962		4.30907		Hippo	11.6179	48.4546	2.37086	0.148002	1.44646	0.855874		0.724448
Amygdala	17.7889	12.5412	80.8901	2.95623	2.37051	7.53901	54.3452	6.1573		Amygdala	70.6283	107.087	2.56379	0	0.999555	1.38693	2.18344	1.26458
Striatum	9.71386	23.287	76.7262	0.260601	1.5468		4.22644	3.05857		Striatum	69.1693	90.2499	4.09331	0.20967	0.840471		1.55475	0.756377
Thalamus	10.4082	13.0424	25.2407	1.2343	2.31063		7.87686	1.97868		Thalamus	0.453794	1.06489	3.28152	0	0		0	0.040967
Cerebellum	18.227	19.0665	1.76014	0.087634	0.990161	1.72413	5.15249	4.56789		Cerebellum	0.096556	0.366762	0.839398	0	0	0	0	0.043774
GLO1	21wg	24wg	4mo	6mo	4yr	11yr	15yr	23yr		DLX2	21wg	24wg	4mo	6mo	4yr	11yr	15yr	23yr
DLPC	13.5398	32.6475	26.7794	9.95857	11.015	39.6529	41.2788	22.9123		DLPC	5.16849	11.3036	2.05966	0	0.159682	0.857033	0.968195	1.45652
VLPC	17.0626	26.0228	35.5345	20.0749	20.696	42.3812	50.2284	23.0103		VLPC	3.28776	7.68193	1.62086	0.088282	0.406218	1.17938	0.480457	0.622331
MPC	20.3338	25.5448	27.3285	13.8784	17.7303	31.4492	49.274	26.3756		MPC	2.85152	10.7508	1.06989	0	0.658956	1.01077	0.639205	0.916408
OFC	15.6857	26.613	26.7316	10.0933	24.4859	36.1595	41.4867	24.2681		OFC	6.26063	7.56757	4.02262	0.052685	0.402592	0.655604	0.739253	0.484603
Motor	17.9174	34.1517	34.1871	14.986	30.0774	34.1434	43.2907	20.6869		Motor	3.61348	7.99579	0.84756	0.055397	0.891072	0.697364	0.584073	0.843932
Sensory	13.0847	24.5324	46.4365	4.72287	19.1348	37.4809	55.4475	28.957		Sensory	7.99442	9.76049	1.01372	0.053666	0.744228	0.337069	0.654928	0.591011
PI Parietal	15.4261	36.0662	23.0144	12.9012	36.7656	41.6031	40.199	30.0275		PI Parietal	6.0077	6.098	2.62962	0.044844	0.675409	0.639623	0.31209	0.390656
Auditory	8.67124	31.4403	38.9839	9.80158	34.505	37.3062	53.1119	23.5944		Auditory	6.10476	7.50593	0.864933	0	1.19451	0.658645	0.800374	0.901012
PS Temp	6.87268	20.9918	36.6134	13.4722	21.1688	52.7664	56.2634	22.3534		PS Temp	9.65975	13.2674	0.869659	0.094727	0.352689	0.681188	0.793926	0.621711
IL Temp	5.85546	23.7699	39.4666	7.86812	31.4355	64.4775	38.4758	23.2359		IL Temp	10.0105	15.0541	1.35524	0	1.00784	0.322746	0.614373	0.569974
Visual	16.5144	25.1992	41.2715	3.07851	16.5334	24.0245	33.8077	17.6124		Visual	5.23721	9.78512	0.523403	0	0.757986	0.332124	0.810202	0.151216
Hippo	25.9442	47.9716	31.8477	8.52279	19.5277	50.978		17.6904		Hippo	5.18853	40.2019	0.379506	0.28251	1.08679	0.12541		0.188475
Amygdala	20.8571	42.759	36.2058	4.44428	14.7045	25.404	38.7048	16.8916		Amygdala	52.1188	111.308	0.494923	0	0.353652	0.440232	0.82771	0.344607
Striatum	18.768	43.7095	35.3986	2.128	22.9672		32.8926	14.5517		Striatum	64.721	100.164	0.792048	0	0.274949		0.226407	0.207525
Thalamus	38.3086	50.9142	28.005	10.2739	33.3618		35.9305	10.3441		Thalamus	0.511401	0.942998	0.511414	0	0		0	0
Cerebellum	23.0188	44.0664	9.66903	6.5457	50.0903	22.1048	30.0522	28.2853		Cerebellum	0	0.563414	0.392249	0	0	0.043336	0	0
RAPGEF4	21wg	24wg	4mo	6mo	4yr	11yr	15yr	23yr		HSD11B1L	21wg	24wg	4mo	6mo	4yr	11yr	15yr	23yr
DLPC	0.893705	1.02169	40.1356	2.31868	5.14502	32.8132	73.1706	73.0506		DLPC	15.3954	22.9104	30.9892	14.5673	52.9091	35.1097	35.0168	35.2996
VLPC	1.85179	1.5087	45.2638	9.9864	19.1636	37.7181	76.9942	32.0022		VLPC	8.81019	26.4407	30.4514	25.0924	27.7729	39.405	33.3907	26.0493
MPC	1.77477	1.8962	32.616	9.09406	11.2063	39.3242	89.7483	37.1589		MPC	9.0527	25.113	28.4579	14.1366	66.7209	25.9057	28.297	22.6042
OFC	1.35398	1.33247	29.6126	4.68975	7.81121	40.2653	82.3498	47.9899		OFC	10.049	24.4934	41.6335	11.1752	82.1832	26.0436	31.9042	25.9655
Motor	1.18357	2.364	51.7025	6.03991	15.5021	32.0166	62.7413	39.2105		Motor	13.6062	27.9707	22.8025	10.1604	54.9508	26.3366	32.1683	27.3004
Sensory	1.73627	1.71045	58.9963	0.965492	6.96175	45.5343	60.3911	38.2338		Sensory	20.0268	26.7257	28.6153	11.1026	54.9624	27.6857	23.371	22.3218
PI Parietal	0.61219	1.75164	24.6991	4.56331	17.2527	33.194	70.1606	29.7953		PI Parietal	13.4642	23.4837	38.3038	9.55053	56.6442	26.7556	25.7629	15.6959
Auditory	0.784185	1.76666	44.8246	3.82322	12.8127	55.8277	72.1517	33.5963		Auditory	11.6525	22.8426	13.6898	9.82853	48.7381	22.963	50.4935	19.6309
PS Temp	1.68095	1.03305	58.0041	4.71216	17.1157	63.3131	80.6869	46.191		PS Temp	19.6423	32.4623	19.5325	9.59531	50.3641	43.0215	25.8429	21.6822
IL Temp	2.87737	2.32796	68.7656	3.57683	17.3331	56.0426	95.2251	61.1544		IL Temp	22.0427	21.7775	19.342	9.42407	62.7937	31.5271	29.8658	24.5323
Visual	0.90153	1.26395	66.815	0.781601	5.90544	34.1064	37.6064	13.7174		Visual	9.92515	21.5345	27.5936	6.36166	56.4885	21.1684	20.0158	9.57917
Hippo	3.53364	3.79998	35.3924	5.04703	16.685	27.4974		38.7477		Hippo	15.1813	23.0632	53.7641	7.7505	50.9875	31.9186		16.1521
Amygdala	3.6231	1.38386	59.4791	3.65072	13.315	24.5069	49.2203	30.3537		Amygdala	33.3345	17.0893	23.7067	9.71747	57.4135	23.1953	24.6828	15.2864
Striatum	3.35546	4.92891	62.9231	0.140546	7.32897		19.5727	7.16795		Striatum	28.5226	24.3629	25.546	4.17664	25.1413		29.2123	13.217
Thalamus	3.7885	3.18457	118.347	1.47759	9.62454		15.7189	9.51187		Thalamus	27.2624	47.5901	30.5523	13.1202	26.1967		17.5254	7.83593
Cerebellum	2.78595	2.91632	16.0712	0.111055	5.21177	15.662	12.8362	12.5702		Cerebellum	14.8973	21.6303	43.5185	19.2639	15.9466	7.01826	9.27804	11.7591
APC	21wg	24wg	4mo	6mo	4yr	11yr	15yr	23yr		ROBO1	21wg	24wg	4mo	6mo	4yr	11yr	15yr	23yr
DLPC	31.2281	32.6477	97.1129	4.32882	1.86666	22.3265	53.2858	40.255		DLPC	42.4739	39.9064	11.8182	0.233608	0.052666	1.90213	5.23164	5.24521
VLPC	48.9785	24.3217	142.322	9.73356	7.83378	23.0712	56.905	22.7227		VLPC	42.7471	30.4654	12.1763	1.01754	0.486913	1.89654	5.23597	4.2775
MPC	43.7028	34.3189	52.6151	8.34188	7.53919	31.8587	59.646	30.8687		MPC	40.809	45.429	5.83999	0.688223	0.468286	2.93034	5.17814	5.18098
OFC	43.9538	19.1953	58.2883	4.01353	1.88277	25.4143	61.7857	29.4802		OFC	60.4692	24.6032	5.76819	0.268639	0.316929	2.74615	4.69777	5.59004
Motor	37.1154	48.4323	150.433	5.45094	6.70397	23.4121	44.9651	29.0607		Motor	27.7411	22.246	9.62065	0.493846	0.52433	2.15887	4.90998	4.88699
Sensory	34.0414	37.5089	152.22	1.40271	3.09851	27.4269	44.8473	27.0155		Sensory	19.2294	25.1854	8.02863	0.10824	0.441136	1.92452	3.06082	4.69452
PI Parietal	31.571	29.532	61.2375	3.92709	11.0623	22.2134	51.2635	30.4589		PI Parietal	18.272	21.5256	6.0936	0.163165	0.710817	1.99205	4.57876	4.51863
Auditory	28.7078	31.1166	106.094	4.04319	6.17974	49.1727	37.5959	23.9792		Auditory	25.0927	30.7588	7.1902	0.321632	0.715345	2.88375	3.64105	4.94501
PS Temp	21.5312	13.1508	164.276	4.94829	3.74531	19.1996	49.4529	30.2129		PS Temp	43.6198	11.6429	6.39049	0.300857	0.112593	1.30026	3.87178	5.41408
IL Temp	27.4276	36.1855	179.262	4.49332	10.9212	11.0496	55.0928	41.1492		IL Temp	58.3751	44.6608	8.01427	0.108644	0.852369	1.1344	4.69712	6.55758
Visual	33.4024	24.3033	32.348	4.17422	2.137	45.5629	47.5105	13.4697		Visual	16.7684	16.4432	3.31527	0.100831	0.038853	1.62166	2.99863	3.21215
Hippo	78.6172	36.6504	8.87965	4.72064	7.11914	6.44665		24.9802		Hippo	25.0662	17.3628	0.647166	0.477007	0.813065	1.14193		4.99841
Amygdala	29.2974	34.3729	31.8412	4.25985	2.96976	28.6961	48.1742	21.2844		Amygdala	31.5431	56.2362	2.42919	0.387817	0.403627	3.78819	9.23708	4.59068
Striatum	18.1312	28.6867	31.3501	1.51942	2.72399		14.9404	15.2464		Striatum	50.306	68.5134	2.46784	0.205064	0.943268		7.19138	6.62668
Thalamus	33.0791	17.8712	32.2384	3.12821	7.19021		21.4012	10.0172		Thalamus	25.5974	19.7883	2.44352	0.454449	3.15237		14.0095	3.12988
Cerebellum	32.9006	26.1176	2.23261	1.18403	4.52412	23.3566	16.1646	13.3452		Cerebellum	18.3861	13.2962	0.165415	0.52887	1.38013	10.4167	6.39827	5.97703
DCX	21wg	24wg	4mo	6mo	4yr	11yr	15yr	23yr		GABRB3	21wg	24wg	4mo	6mo	4yr	11yr	15yr	23yr
DLPC	58.2969	83.6241	8.42245	0.13963	0.030831	0.537564	1.73285	0.669707		DLPC	22.7102	32.334	47.3157	0.947048	2.01059	25.1219	56.2261	13.4012
VLPC	85.1906	28.7262	6.91723	0.033624	0	0.593508	0.951395	0.475592		VLPC	31.1077	21.3666	60.0161	1.25623	2.60667	19.1764	61.2757	16.568
MPC	32.1732	65.8475	2.01555	0.317683	0.136708	0.179448	0.976742	0.99534		MPC	21.0505	31.7961	20.4026	0.665719	7.04729	18.4432	40.8212	22.3642
OFC	81.2738	15.1611	3.72589	0.083624	0	0.350273	0.967518	0.624593		OFC	24.9987	14.1504	28.3061	0.693985	2.20381	20.1736	59.5635	17.9161
Motor	45.3982	40.8433	5.93381	0.019927	0	0.467399	0.582668	0.456284		Motor	24.533	29.0608	42.1713	0.487913	5.8328	21.898	39.4074	14.9833
Sensory	45.1741	72.2775	4.50122	0.026685	0	0.383996	1.21659	0.364448		Sensory	25.2812	38.6069	39.6286	0.321857	4.31445	22.4193	41.0536	12.7636
PI Parietal	33.6987	69.7376	3.4877	0.090088	0.083915	0.357109	1.30702	0.485656		PI Parietal	17.8926	35.3419	33.6778	1.09819	11.2315	21.8401	53.2953	16.5729
Auditory	58.8849	67.0024	2.65184	0.182613	0.135841	0.604778	0.818474	0.486634		Auditory	24.7065	41.8866	27.9603	0.822658	6.33724	23.8393	46.6084	11.0746
PS Temp	52.6957	7.1763	4.75121	0.369807	0	0.4368	1.10201	0.335784		PS Temp	31.3604	7.16691	30.4393	0.80394	1.83561	16.3853	54.0591	12.4578
IL Temp	64.2097	85.0674	3.01083	0.108882	0.086486	0.388973	1.41277	0.716087		IL Temp	29.2065	41.2717	27.3893	1.05773	10.9284	17.6986	54.7818	18.156
Visual	61.1089	52.4068	0.47874	0.078812	0	0.527676	1.16158	0.058404		Visual	23.0698	24.4623	35.6916	1.2577	1.30774	12.2714	33.5648	1.62642
Hippo	25.6926	28.1239	0.075039	0.179333	0	0.096857		0.272919		Hippo	26.535	28.4712	6.69321	1.35866	5.02169	8.46429		5.81217
Amygdala	28.7062	124.598	0.323053	0.093665	0.058901	0.284529	1.34918	0.220083		Amygdala	14.1867	15.5486	34.7168	0.745653	2.14391	8.37566	46.399	4.35877
Striatum	23.984	90.7566	0.443451	0.078334	0.093884		1.23599	0.375334		Striatum	17.999	46.2803	30.9698	0.207574	3.82708		26.2071	5.24078
Thalamus	18.3945	6.33557	0.187526	0	0.059291		0.145205	0.062061		Thalamus	20.2447	19.7973	12.0113	0.748236	6.5766		20.0714	1.77423
Cerebellum	37.3693	34.5121	0.025363	0.510817	0.083862	0.168722	0.060901	0.09503		Cerebellum	19.2602	22.548	1.67743	0.850306	5.3977	15.5694	23.0656	14.2667
RIMS3	21wg	24wg	4mo	6mo	4yr	11yr	15yr	23yr
DLPC	9.78698	6.58171	17.9738	0.390044	1.57346	31.8251	62.7347	29.8267
VLPC	7.50159	2.92314	21.7533	0.972563	1.70964	26.5986	58.7192	25.0917
MPC	4.20119	6.30638	6.79634	0.270453	10.0818	24.7085	39.6575	31.228
OFC	7.28827	2.59579	14.7648	0.06047	2.22067	19.6481	46.745	31.2481
Motor	4.10777	4.0205	16.8685	0.253439	4.51518	24.0415	48.0638	29.2085
Sensory	8.13367	8.4269	17.0697	0.026276	3.10098	25.7057	41.6323	17.2196
PI Parietal	4.47259	4.70528	15.3693	0.210762	4.68817	26.2706	39.5213	21.5248
Auditory	7.27123	6.72792	6.1863	0.111012	3.31975	21.9793	64.456	16.5161
PS Temp	12.9831	1.03908	11.3879	0	1.88732	28.7957	34.339	15.989
IL Temp	10.7408	6.45744	8.92179	0.221092	6.48187	15.0595	34.7163	18.5007
Visual	5.03842	4.04488	74.0079	0.220154	0.920384	35.5309	60.0317	2.89925
Hippo	2.87389	2.07465	26.3778	0.335004	0.718363	3.95927		1.8909
Amygdala	2.26488	1.94398	63.3198	0.274636	2.5341	4.31389	16.1168	3.95775
Striatum	5.64265	7.13749	66.6726	0.140846	1.53271		9.08314	3.85002
Thalamus	9.68616	7.66718	23.8568	0.269794	8.43639		60.5241	3.45921
Cerebellum	14.0912	11.025	1.79634	1.13809	11.8852	29.6468	39.365	29.7119
